# Supplementary material for: Mapping 123 million neonatal, infant and child deaths between 2000 and 2017
Source: Springer Nature journal article supplement (doi:10.1038/s41586-019-1545-0), 2019-10-16
Supplement: MOESM1 [file 41586_2019_1545_MOESM1_ESM.pdf]

## **Mapping 123 million neonatal, infant and child deaths between 2000 and 2017**

BURSTEIN, Roy, HENRY, Nathaniel J., COLLISON, Michael L., MARCZAK, Laurie B., SLIGAR, Amber, WATSON, Stefanie, MARQUEZ, Neal, ABBASALIZAD-FARHANGI, Mahdieh, ABBASI, Masoumeh, ABD-ALLAH, Foad, ABDOLI, Amir, ABDOLLAHI, Mohammad, ABDOLLAHPOUR, Ibrahim, ABDULKADER, Rizwan Suliankatchi, ABRIGO, Michael R. M., ACHARYA, Dilaram, ADEBAYO, Oladimeji M., ADEKANMBI, Victor, ADHAM, Davoud, AFSHARI, Mahdi, AGHAALI, Mohammad, AHMADI, Keivan, AHMADI, Mehdi, AHMADPOUR, Ehsan, AHMED, Rushdia, AKAL, Chalachew Genet, AKINYEMI, Joshua O., ALAHDAB, Fares, ALAM, Noore, ALAMENE, Genet Melak, ALENE, Kefyalew Addis, ALIJANZADEH, Mehran, ALINIA, Cyrus, ALIPOUR, Vahid, ALJUNID, Syed Mohamed, ALMALKI, Mohammed J., AL-MEKHLAFI, Hesham M., ALTIRKAWI, Khalid, ALVIS-GUZMAN, Nelson, AMEGAH, Adeladza Kofi, AMINI, Saeed, AMIT, Arianna Maeve Loreche, ANBARI, Zohreh, ANDROUDI, Sofia, ANJOMSHOA, Mina, ANSARI, Fereshteh, ANTONIO, Carl Abelardo T., ARABLOO, Jalal, AREFI, Zohreh, AREMU, Olatunde, ARMOON, Bahram, ARORA, Amit, ARTAMAN, Al, ASADI, Anvar, ASADI-ALIABADI, Mehran, ASHRAF-GANJOU EI, Amir, ASSADI, Reza, ATAEINIA, Bahar, ATRE, Sachin R., QUINTANILLA, Beatriz Paulina Ayala, AYANORE, Martin Amogre, AZARI, Samad, BABAEE, Ebrahim, BABAZADEH, Arefeh, BADAWI, Alaa, BAGHERI, Soghra, BAGHERZADEH, Mojtaba, BAHEIRAEI, Nafiseh, BALOUCHI, Abbas, BARAC, Aleksandra, BASSAT, Quique, BAUNE, Bernhard T., BAYATI, Mohsen, BEDI, Neeraj, BEGHI, Ettore, BEHZADIFAR, Masoud, BEHZADIFAR, Meysam, BELAY, Yared Belete, BELL, Brent, BELL, Michelle L., BERBADA, Dessalegn Ajema, BERNSTEIN, Robert S., BHATTACHARJEE, Natalia V., BHATTARAI, Suraj, BHUTTA, Zulfiqar A., BIJANI, Ali, BOHLOULI, Somayeh, BREITBORDE, Nicholas J. K., BRITTON, Gabrielle, BROWNE, Annie J., NAGARAJA, Sharath Burugina, BUSSE, Reinhard, BUTT, Zahid A., CAR, Josip, CÁRDENAS, Rosario, CASTAÑEDA-ORJUELA, Carlos A., CERIN, Ester, CHANIE, Wagaye Fentahun, CHATTERJEE, Pranab, CHU, Dinh-Toi, COOPER, Cyrus, COSTA, Vera M., DALAL, Koustuv, DANDONA, Lalit, DANDONA, Rakhi, DAOUD, Farah, DARYANI, Ahmad, DAS GUPTA, Rajat, DAVIS, Ian, DAVIS WEAVER, Nicole, DAVITOIU, Dragos Virgil, DE NEVE, Jan-Walter, DEMEKE, Feleke Mekonnen, DEMOZ, Gebre Teklemariam, DERIBE, Kebede, DESAI, Rupak, DESHPANDE, Aniruddha, DESYIBELEW, Hanna Demelash, DEY, Sagnik, DHARMARATNE, Samath Dhamminda, DHIMAL, Meghnath, DIAZ, Daniel, DOSHMANGIR, Leila, DURAES, Andre R., DWYER-LINDGREN, Laura, EARL, Lucas, EBRAHIMI, Roya, EBRAHIMPOUR, Soheil, EFFIONG, Andem,

EFTEKHARI, Aziz, EHSANI-CHIMEH, Elham, EL SAYED, Iman, EL SAYED ZAKI, Maysaa, EL TANTAWI, Maha, EL-KHATIB, Ziad, EMAMIAN, Mohammad Hassan, ENANY, Shymaa, ESKANDARIEH, Sharareh, EYAWO, Oghenowede, EZALARAB, Maha, FARAMARZI, Mahbobeh, FAREED, Mohammad, FARIDNIA, Roghiyeh, FARO, Andre, FAZAELI, Ali Akbar, FAZLZADEH, Mehdi, FENTAHUN, Netsanet, FERESHTEHNEJAD, Seyed-Mohammad, FERNANDES, João C., FILIP, Irina, FISCHER, Florian, FOIGT, Nataliya A., FOROUTAN, Masoud, FRANCIS, Joel Msafiri, FUKUMOTO, Takeshi, FULLMAN, Nancy, GALLUS, Silvano, GEBRE, Destallem Gebremedhin, GEBREHIWOT, Tsegaye Tewelde, GEBREMESKEL, Gebreamlak Gebremedhn, GESSNER, Bradford D., GETA, Birhanu, GETHING, Peter W., GHADIMI, Reza, GHADIRI, Keyghobad, GHAJARZADEH, Mahsa, GHASHGHAEI, Ahmad, GILL, Paramjit Singh, GILL, Tiffany K., GOLDING, Nick, GOMES, Nelson G. M., GONA, Philimon N., GOPALANI, Sameer Vali, GORINI, Giuseppe, GOULART, Bárbara Niegia Garcia, GRAETZ, Nicholas, GREAVES, Felix, GREEN, Manfred S., GUO, Yuming, HAJ-MIRZAIAN, Arvin, HAJ-MIRZAIAN, Arya, HALL, Brian James, HAMIDI, Samer, HARIRIAN, Hamidreza, HARO, Josep Maria, HASANKHANI, Milad, HASANPOOR, Edris, HASANZADEH, Amir, HASSANKHANI, Hadi, HASSEN, Hamid Yimam, HEGAZY, Mohamed I., HENDRIE, Delia, HEYDARPOUR, Fatemeh, HIRD, Thomas R., HOANG, Chi Linh, HOLLERICH, Gillian, RAD, Enayatollah Homaie, HOSEINI-GHAHFAROKHI, Mojtaba, HOSSAIN, Naznin, HOSSEINI, Mostafa, HOSSEINZADEH, Mehdi, HOSTIUC, Mihaela, HOSTIUC, Sorin, HOUSEH, Mowafa, HSAIRI, Mohamed, ILESANMI, Olayinka Stephen, IMANI-NASAB, Mohammad Hasan, IQBAL, Usman, IRVANI, Seyed Sina Naghibi, ISLAM, Nazrul, ISLAM, Sheikh Mohammed Shariful, JÜRISSE, Mikko, BALALAMI, Nader Jafari, JALALI, Amir, JAVIDNIA, Javad, JAYATILLEKE, Achala Upendra, JENABI, Ensiyeh, Ji, John S., JOBANPUTRA, Yash B., JOHNSON, Kimberly, JONAS, Jost B., SHUSHTARI, Zahra Jorjoran, JOZWIAK, Jacek Jerzy, KABIR, Ali, KAHSAY, Amaha, KALANI, Hamed, KALHOR, Rohollah, KARAMI, Manoochehr, KARKI, Surendra, KASAEIAN, Amir, KASSEBAUM, Nicholas J., KEIYORO, Peter Njenga, KEMP, Grant Rodgers, KHABIRI, Roghayeh, KHADER, Yousef Saleh, KHAFAIE, Morteza Abdullatif, KHAN, Ejaz Ahmad, KHAN, Junaid, KHAN, Muhammad Shahzeb, KHANG, Young-Ho, KHATAB, Khaled <<http://orcid.org/0000-0002-8755-3964>>, KHATER, Amir, KHATER, Mona M., KHATONY, Alireza, KHAZAEI, Mohammad, KHAZAEI, Salman, KHAZAEI-POOL, Maryam, KHUBCHANDANI, Jagdish, KIANIPOUR, Neda, KIM, Yun Jin, KIMOKOTI, Ruth W., KINYOKI, Damaris K., KISA, Adnan, KISA, Sezer, KOLOLA, Tufa, KOSEN, Soewarta, KOUL, Parvaiz A., KOYANAGI, Ai, KRAEMER, Moritz U. G., KRISHAN, Kewal, KROHN, Kris J., KUGBEY, Nuworza, KUMAR, G. Anil, KUMAR, Manasi, KUMAR, Pushpendra, KUUPIEL, Desmond, LACEY, Ben, LAD, Sheetal D., LAMI, Faris Hasan, LARSSON, Anders O., LEE, Paul H., LEILI, Mostafa, LEVINE, Aubrey J., LI, Shanshan, LIM, Lee-Ling, LISTL, Stefan, LONGBOTTOM, Joshua, LOPEZ, Jaifred Christian F., LORKOWSKI, Stefan, MAGDELDIN, Sameh, ABD EL RAZEK, Hassan Magdy, ABD EL RAZEK, Muhammed Magdy, MAJEED, Azeem, MALEKI, Afshin, MALEKZADEH, Reza, MALTA, Deborah Carvalho,

MAMUN, Abdullah A., MANAFI, Navid, MANDA, Ana-Laura, MANSOURIAN, Morteza, MARTINS-MELO, Francisco Rogerlândio, MASAKA, Anthony, MASSENBURG, Benjamin Ballard, MAULIK, Pallab K., MAYALA, Benjamin K., MAZIDI, Mohsen, MCKEE, Martin, MEHROTRA, Ravi, MEHTA, Kala M., MELES, Gebrekiros Gebremichael, MENDOZA, Walter, MENEZES, Ritesh G., MERETOJA, Atte, MERETOJA, Tuomo J., MESTROVIC, Tomislav, MILLER, Ted R., MILLER-PETRIE, Molly K., MILLS, Edward J., MILNE, George J., MINI, G. K., MIR, Seyed Mostafa, MIRJALALI, Hamed, MIRRAKHIMOV, Erkin M., MOHAMADI, Efat, MOHAMMAD, Dara K., DARWESH, Aso Mohammad, MEZERJI, Naser Mohammad Gholi, MOHAMMED, Ammas Siraj, MOHAMMED, Shafiu, MOKDAD, Ali H., MOLOKHIA, Mariam, MONASTA, Lorenzo, MOODLEY, Yoshan, MOOSAZADEH, Mahmood, MORADI, Ghobad, MORADI, Masoud, MORADI, Yousef, MORADI-LAKEH, Maziar, MORADINAZAR, Mehdi, MORAGA, Paula, MORAWSKA, Lidia, MOSAPOUR, Abbas, MOUSAVI, Seyyed Meysam, MUELLER, Ulrich Otto, MULUNEH, Atalay Goshu, MUSTAFA, Ghulam, NABAVIZADEH, Behnam, NADERI, Mehdi, NAGARAJAN, Ahamarshan Jayaraman, NAHVIJOU, Azin, NAJAFI, Farid, NANGIA, Vinay, NDWANDWE, Duduzile Edith, NEAMATI, Nahid, NEGOI, Ionut, NEGOI, Ruxandra Irina, NGUNJIRI, Josephine W., THI NGUYEN, Huong Lan, NGUYEN, Long Hoang, NGUYEN, Son Hoang, NIELSEN, Katie R., NINGRUM, Dina Nur Anggraini, NIRAYO, Yirga Legesse, NIXON, Molly R., NNAJI, Chukwudi A., NOJOMI, Marzieh, NOROOZI, Mehdi, NOSRATNEJAD, Shirin, NOUBIAP, Jean Jacques, MOTLAGH, Soraya Nouraei, OFORI-ASENSO, Richard, OGBO, Felix Akpojene, OLADIMEJI, Kelechi E., OLAGUNJU, Andrew T., OLFATIFAR, Meysam, OLUM, Solomon, OLUSANYA, Bolajoko Olubukunola, OLUWASANU, Mojisola Morenike, ONWUJEKWE, Obinna E., OREN, Eyal, ORTEGA-ALTAMIRANO, Doris D. V., ORTIZ, Alberto, OSARENOTOR, Osayomwanbo, OSEI, Frank B., OSGOOD-ZIMMERMAN, Aaron E., OTSTAVNOV, Stanislav S., OWOLABI, Mayowa Ojo, P. A., Mahesh, PAGHEH, Abdol Sattar, PAKHALE, Smita, PANDA-JONAS, Songhomitra, PANDEY, Animika, PARK, Eun-Kee, PARSIAN, Hadi, PASHAEI, Tahereh, PATEL, Sangram Kishor, PEPITO, Veincent Christian Filipino, PEREIRA, Alexandre, PERKINS, Samantha, PICKERING, Brandon V., PILGRIM, Thomas, PIRESTANI, Majid, PIROOZI, Bakhtiar, PIRSAHEB, Meghdad, PLANA-RIPOLL, Oleguer, POURJAFAR, Hadi, PURI, Parul, QORBANI, Mostafa, QUINTANA, Hedley, RABIEE, Mohammad, RABIEE, Navid, RADFAR, Amir, RAFIEI, Alireza, RAHIM, Fakher, RAHIMI, Zohreh, RAHIMI-MOVAGHAR, Vafa, RAHIMZADEH, Shadi, RAJATI, Fatemeh, RAJU, Sree Bhushan, RAMEZANKHANI, Azra, RANABHAT, Chhabi Lal, RASELLA, Davide, RASHEDI, Vahid, RAWAL, Lal, REINER JR, Robert C., RENZAHO, Andre M. N., REZAEI, Satar, REZAPOUR, Aziz, RIAHI, Seyed Mohammad, RIBEIRO, Ana Isabel, ROEVER, Leonardo, RORO, Elias Merdassa, ROSER, Max, ROSHANDEL, Gholamreza, ROSHANI, Daem, ROSTAMI, Ali, RUBAGOTTI, Enrico, RUBINO, Salvatore, SABOUR, Siamak, SADAT, Nafis, SADEGHI, Ehsan, SAEEDI, Reza, SAFARI, Yahya, SAFARI-FARAMANI, Roya, SAFDARIAN, Mahdi, SAHEBKAR, Amirhossein, SALAHSHOOR, Mohammad Reza, SALAM, Nasir, SALAMATI, Payman, SALEHI, Farkhonde, ZAHABI, Saleh Salehi, SALIMI, Yahya, SALIMZADEH, Hamideh, SALOMON,

Joshua A., SAMBALA, Evanson Zondani, SAMY, Abdallah M., SANTRIC MILICEVIC, Milena M., JOSE, Bruno Piassi Sao, SARASWATHY, Sivan Yegnanarayana Iyer, SARMIENTO-SUÁREZ, Rodrigo, SARTORIUS, Benn, SATHIAN, Brijesh, SAXENA, Sonia, SBARRA, Alyssa N., SCHAEFFER, Lauren E., SCHWEBEL, David C., SEPANLOU, Sadaf G., SEYEDMOUSAVI, Seyedmojtaba, SHAAHMADI, Famararz, SHAIKH, Masood Ali, SHAMS-BEYRANVAND, Mehran, SHAMSHIRIAN, Amir, SHAMSIZADEH, Morteza, SHARAFI, Kiomars, SHARIF, Mehdi, SHARIF-ALHOSEINI, Mahdi, SHARIFI, Hamid, SHARMA, Jayendra, SHARMA, Rajesh, SHEIKH, Aziz, SHIELDS, Chloe, SHIGEMATSU, Mika, SHIRI, Rahman, SHIUE, Ivy, SHUVAL, Kerem, SIDDIQI, Tariq J., SILVA, João Pedro, SINGH, Jasvinder A., SINHA, Dhirendra Narain, SISAY, Malede Mequanent, SISAY, Solomon, SLIWA, Karen, SMITH, David L., SOMAYAJI, Ranjani, SOOFI, Moslem, SORIANO, Joan B., SREERAMAREDDY, Chandrashekhar T., SUDARYANTO, Agus, SUFIYAN, Mu'awiyah Babale, SYKES, Bryan L., SYLAJA, P. N., TABARÉS-SEISDEDOS, Rafael, TABB, Karen M., TABUCHI, Takahiro, TAVEIRA, Nuno, TEMSAH, Mohamad-Hani, TERKAWI, Abdullah Sulieman, TESSEMA, Zemenu Tadesse, THANKAPPAN, Kavumpurathu Raman, THIRUNAVUKKARASU, Sathish, TO, Quyen G., TOVANI-PALONE, Marcos Roberto, TRAN, Bach Xuan, TRAN, Khanh Bao, ULLAH, Irfan, USMAN, Muhammad Shariq, UTHMAN, Olalekan A., VAHEDIAN-AZIMI, Amir, VALDEZ, Pascual R., VAN BOVEN, Job F. M., VASANKARI, Tommi Juhani, VASSEGHIAN, Yasser, VEISANI, Yousef, VENKETASUBRAMANIAN, Narayanaswamy, VIOLANTE, Francesco S., VLADIMIROV, Sergey Konstantinovitch, VLASSOV, Vasily, VOS, Theo, VU, Giang Thu, VUJCIC, Isidora S., WAHEED, Yasir, WAKEFIELD, Jon, WANG, Haidong, WANG, Yafeng, WANG, Yuan-Pang, WARD, Joseph L., WEINTRAUB, Robert G., WELDEGWERGS, Kidu Gidey, WELDESAMUEL, Girmay Teklay, WESTERMAN, Ronny, WIYSONGE, Charles Shey, WONDAFRASH, Dawit Zewdu, WOYCZYNSKI, Lauren, WU, Ai-Min, XU, Gelin, YADEGAR, Abbas, YAMADA, Tomohide, YAZDI-FEYZABADI, Vahid, YILGWAN, Christopher Sabo, YIP, Paul, YONEMOTO, Naohiro, LEBNI, Javad Yoosefi, YOUNIS, Mustafa Z., YOUSEFIFARD, Mahmoud, YOUSOF, Hebat-Allah Salah A., YU, Chuanhua, YUSEFZADEH, Hasan, ZABEH, Erfan, MOGHADAM, Telma Zahirian, BIN ZAMAN, Sojib, ZAMANI, Mohammad, ZANDIAN, Hamed, ZANGENEH, Alireza, ZERFU, Taddese Alemu, ZHANG, Yunquan, ZIAPOUR, Arash, ZODPEY, Sanjay, MURRAY, Christopher J. L. and HAY, Simon I.

Available from Sheffield Hallam University Research Archive (SHURA) at:

<https://shura.shu.ac.uk/27399/>



**Citation:**

BURSTEIN, Roy, HENRY, Nathaniel J., COLLISON, Michael L., MARCZAK, Laurie B., SLIGAR, Amber, WATSON, Stefanie, MARQUEZ, Neal, ABBASALIZAD-FARHANGI, Mahdiah, ABBASI, Masoumeh, ABD-ALLAH, Foad, ABDOLI, Amir, ABDOLLAHI, Mohammad, ABDOLLAHPOUR, Ibrahim, ABDULKADER, Rizwan Suliankatchi, ABRIGO, Michael R. M., ACHARYA, Dilaram, ADEBAYO, Oladimeji M., ADEKANMBI, Victor, ADHAM, Davoud, AFSHARI, Mahdi, AGHAALI, Mohammad, AHMADI, Keivan, AHMADI, Mehdi, AHMADPOUR, Ehsan, AHMED, Rushdia, AKAL, Chalachew Genet, AKINYEMI, Joshua O., ALAHDAB, Fares, ALAM, Noore, ALAMENE, Genet Melak, ALENE, Kefyalew Addis, ALIJANZADEH, Mehran, ALINIA, Cyrus, ALIPOUR, Vahid, ALJUNID, Syed Mohamed, ALMALKI, Mohammed J., AL-MEKHLAFI, Hesham M., ALTIRKAWI, Khalid, ALVIS-GUZMAN, Nelson, AMEGAH, Adeladza Kofi, AMINI, Saeed, AMIT, Arianna Maeve Loreche, ANBARI, Zohreh, ANDROUDI, Sofia, ANJOMSHOA, Mina, ANSARI, Fereshteh, ANTONIO, Carl Abelardo T., ARABLOO, Jalal, AREFI, Zohreh, AREMU, Olatunde, ARMOON, Bahram, ARORA, Amit, ARTAMAN, Al, ASADI, Anvar, ASADI-ALIABADI, Mehran, ASHRAF-GANJOU EI, Amir, ASSADI, Reza, ATAEINIA, Bahar, ATRE, Sachin R., QUINTANILLA, Beatriz Paulina Ayala, AYANORE, Martin Amogre, AZARI, Samad, BABAEI, Ebrahim, BABAZADEH, Arefeh, BADAWI, Alaa, BAGHERI, Soghra, BAGHERZADEH, Mojtaba, BAHEIRAEI, Nafiseh, BALOUCHI, Abbas, BARAC, Aleksandra, BASSAT, Quique, BAUNE, Bernhard T., BAYATI, Mohsen, BEDI, Neeraj, BEGHI, Ettore, BEHZADIFAR, Masoud, BEHZADIFAR, Meysam, BELAY, Yared Belete, BELL, Brent, BELL, Michelle L., BERBADA, Dessalegn Ajema, BERNSTEIN, Robert S., BHATTACHARJEE, Natalia V., BHATTARAI, Suraj, BHUTTA, Zulfiqar A., BIJANI, Ali, BOHLOULI, Somayeh, BREITBORDE, Nicholas J. K., BRITTON, Gabrielle, BROWNE, Annie J., NAGARAJA, Sharath Burugina, BUSSE, Reinhard, BUTT, Zahid A., CAR, Josip, CÁRDENAS, Rosario, CASTAÑEDA-ORJUELA, Carlos A., CERIN, Ester, CHANIE, Wagaye Fentahun, CHATTERJEE, Pranab, CHU, Dinh-Toi, COOPER, Cyrus, COSTA, Vera M., DALAL, Koustuv, DANDONA, Lalit, DANDONA, Rakhi, DAOUD, Farah, DARYANI, Ahmad, DAS GUPTA, Rajat, DAVIS, Ian, DAVIS WEAVER, Nicole, DAVITOIU, Dragos Virgil, DE NEVE, Jan-Walter, DEMEKE, Feleke Mekonnen, DEMOZ, Gebre Teklemariam, DERIBE, Kebede, DESAI, Rupak, DESHPANDE, Aniruddha, DESYIBELEW, Hanna Demelash, DEY, Sagnik, DHARMARATNE, Samath Dhamminda, DHIMAL, Meghnath, DIAZ, Daniel, DOSHMANGIR, Leila, DURAES, Andre R., DWYER-LINDGREN, Laura, EARL, Lucas, EBRAHIMI, Roya, EBRAHIMPOUR, Soheil, EFFIONG, Andem, EFTEKHARI, Aziz, EHSANI-CHIMEH, Elham, EL SAYED, Iman, EL SAYED ZAKI, Maysaa, EL TANTAWI, Maha, EL-KHATIB, Ziad, EMAMIAN, Mohammad Hassan, ENANY, Shymaa, ESKANDARIEH, Sharareh, EYAWO, Oghenowede, EZALARAB, Maha, FARAMARZI, Mahbobeh, FAREED, Mohammad, FARIDNIA, Roghiyeh, FARO, Andre, FAZAEI, Ali Akbar, FAZLZADEH, Mehdi, FENTAHUN, Netsanet, FERESHTEHNEJAD, Seyed-Mohammad, FERNANDES, João C., FILIP, Irina, FISCHER, Florian, FOIGT, Nataliya A., FOROUTAN, Masoud, FRANCIS, Joel Msafiri, FUKUMOTO, Takeshi, FULLMAN, Nancy, GALLUS, Silvano, GEBRE, Destallem Gebremedhin, GEBREHIWOT, Tsegaye Tewelde, GEBREMESKEL, Gebreamlak Gebremedhn, GESSNER, Bradford D., GETA, Birhanu, GETHING, Peter W., GHADIMI, Reza, GHADIRI, Keyghobad, GHAJARZADEH, Mahsa, GHASHGHAEI, Ahmad, GILL, Paramjit Singh, GILL, Tiffany K., GOLDING, Nick, GOMES, Nelson G. M., GONA, Philimon N., GOPALANI, Sameer Vali, GORINI, Giuseppe, GOULART, Bárbara Niegia Garcia, GRAETZ, Nicholas, GREAVES, Felix,

GREEN, Manfred S., GUO, Yuming, HAJ-MIRZAIAN, Arvin, HAJ-MIRZAIAN, Arya, HALL, Brian James, HAMIDI, Samer, HARIRIAN, Hamidreza, HARO, Josep Maria, HASANKHANI, Milad, HASANPOOR, Edris, HASANZADEH, Amir, HASSANKHANI, Hadi, HASSEN, Hamid Yimam, HEGAZY, Mohamed I., HENDRIE, Delia, HEYDARPOUR, Fatemeh, HIRD, Thomas R., HOANG, Chi Linh, HOLLERICH, Gillian, RAD, Enayatollah Homaie, HOSEINI-GHAHFAROKHI, Mojtaba, HOSSAIN, Naznin, HOSSEINI, Mostafa, HOSSEINZADEH, Mehdi, HOSTIUC, Mihaela, HOSTIUC, Sorin, HOUSEH, Mowafa, HSAIRI, Mohamed, ILESANMI, Olayinka Stephen, IMANI-NASAB, Mohammad Hasan, IQBAL, Usman, IRVANI, Seyed Sina Naghibi, ISLAM, Nazrul, ISLAM, Sheikh Mohammed Shariful, JÜRISSEON, Mikk, BALALAMI, Nader Jafari, JALALI, Amir, JAVIDNIA, Javad, JAYATILLEKE, Achala Upendra, JENABI, Ensiyeh, JI, John S., JOBANPUTRA, Yash B., JOHNSON, Kimberly, JONAS, Jost B., SHUSHTARI, Zahra Jorjoran, JOZWIAK, Jacek Jerzy, KABIR, Ali, KAHSAY, Amaha, KALANI, Hamed, KALHOR, Rohollah, KARAMI, Manoochehr, KARKI, Surendra, KASAEIAN, Amir, KASSEBAUM, Nicholas J., KEIYORO, Peter Njenga, KEMP, Grant Rodgers, KHABIRI, Roghayeh, KHADER, Yousef Saleh, KHAFAIE, Morteza Abdullatif, KHAN, Ejaz Ahmad, KHAN, Junaid, KHAN, Muhammad Shahzeb, KHANG, Young-Ho, KHATAB, Khaled, KHATER, Amir, KHATER, Mona M., KHATONY, Alireza, KHAZAEI, Mohammad, KHAZAEI, Salman, KHAZAEI-POOL, Maryam, KHUBCHANDANI, Jagdish, KIANIPOUR, Neda, KIM, Yun Jin, KIMOKOTI, Ruth W., KINYOKI, Damaris K., KISA, Adnan, KISA, Sezer, KOLOLA, Tufa, KOSEN, Soewarta, KOUL, Parvaiz A., KOYANAGI, Ai, KRAEMER, Moritz U. G., KRISHAN, Kewal, KROHN, Kris J., KUGBEY, Nuworza, KUMAR, G. Anil, KUMAR, Manasi, KUMAR, Pushpendra, KUUPIEL, Desmond, LACEY, Ben, LAD, Sheetal D., LAMI, Faris Hasan, LARSSON, Anders O., LEE, Paul H., LEILI, Mostafa, LEVINE, Aubrey J., LI, Shanshan, LIM, Lee-Ling, LISTL, Stefan, LONGBOTTOM, Joshua, LOPEZ, Jaifred Christian F., LORKOWSKI, Stefan, MAGDELDIN, Sameh, ABD EL RAZEK, Hassan Magdy, ABD EL RAZEK, Muhammed Magdy, MAJEED, Azeem, MALEKI, Afshin, MALEKZADEH, Reza, MALTA, Deborah Carvalho, MAMUN, Abdullah A., MANAFI, Navid, MANDA, Ana-Laura, MANSOURIAN, Morteza, MARTINS-MELO, Francisco Rogerlândio, MASAKA, Anthony, MASSENBURG, Benjamin Ballard, MAULIK, Pallab K., MAYALA, Benjamin K., MAZIDI, Mohsen, MCKEE, Martin, MEHROTRA, Ravi, MEHTA, Kala M., MELES, Gebrekiros Gebremichael, MENDOZA, Walter, MENEZES, Ritesh G., MERETOJA, Atte, MERETOJA, Tuomo J., MESTROVIC, Tomislav, MILLER, Ted R., MILLER-PETRIE, Molly K., MILLS, Edward J., MILNE, George J., MINI, G. K., MIR, Seyed Mostafa, MIRJALALI, Hamed, MIRRAKHIMOV, Erkin M., MOHAMADI, Efat, MOHAMMAD, Dara K., DARWESH, Aso Mohammad, MEZERJI, Naser Mohammad Gholi, MOHAMMED, Ammas Siraj, MOHAMMED, Shafiu, MOKDAD, Ali H., MOLOKHIA, Mariam, MONASTA, Lorenzo, MOODLEY, Yoshan, MOOSAZADEH, Mahmood, MORADI, Ghobad, MORADI, Masoud, MORADI, Yousef, MORADI-LAKEH, Maziar, MORADINAZAR, Mehdi, MORAGA, Paula, MORAWSKA, Lidia, MOSAPOUR, Abbas, MOUSAVI, Seyyed Meysam, MUELLER, Ulrich Otto, MULUNEH, Atalay Goshu, MUSTAFA, Ghulam, NABAVIZADEH, Behnam, NADERI, Mehdi, NAGARAJAN, Ahamarshan Jayaraman, NAHVIJOU, Azin, NAJAFI, Farid, NANGIA, Vinay, NDWANDWE, Duduzile Edith, NEAMATI, Nahid, NEGOI, Ionut, NEGOI, Ruxandra Irina, NGUNJIRI, Josephine W., THI NGUYEN, Huong Lan, NGUYEN, Long Hoang, NGUYEN, Son Hoang, NIELSEN, Katie R., NINGRUM, Dina Nur Anggraini, NIRAYO, Yirga Legesse, NIXON, Molly R., NNAJI, Chukwudi A., NOJOMI, Marzieh, NOROOZI, Mehdi, NOSRATNEJAD, Shirin, NOUBIAP, Jean Jacques, MOTLAGH, Soraya Nouraei, OFORI-ASENSO, Richard, OGBO, Felix Akpojene, OLADIMEJI, Kelechi E.,

OLAGUNJU, Andrew T., OLFATIFAR, Meysam, OLUM, Solomon, OLUSANYA, Bolajoko Olubukunola, OLUWASANU, Mojisola Morenike, ONWUJEKWE, Obinna E., OREN, Eyal, ORTEGA-ALTAMIRANO, Doris D. V., ORTIZ, Alberto, OSARENOTOR, Osayomwanbo, OSEI, Frank B., OSGOOD-ZIMMERMAN, Aaron E., OTSTAVNOV, Stanislav S., OWOLABI, Mayowa Ojo, P. A., Mahesh, PAGHEH, Abdol Sattar, PAKHALE, Smita, PANDA-JONAS, Songhomitra, PANDEY, Animika, PARK, Eun-Kee, PARSIAN, Hadi, PASHAEI, Tahereh, PATEL, Sangram Kishor, PEPITO, Veincent Christian Filipino, PEREIRA, Alexandre, PERKINS, Samantha, PICKERING, Brandon V., PILGRIM, Thomas, PIRESTANI, Majid, PIROOZI, Bakhtiar, PIRSAHEB, Meghdad, PLANA-RIPOLL, Oleguer, POURJAFAR, Hadi, PURI, Parul, QORBANI, Mostafa, QUINTANA, Hedley, RABIEE, Mohammad, RABIEE, Navid, RADFAR, Amir, RAFIEI, Alireza, RAHIM, Fakher, RAHIMI, Zohreh, RAHIMI-MOVAGHAR, Vafa, RAHIMZADEH, Shadi, RAJATI, Fatemeh, RAJU, Sree Bhushan, RAMEZANKHANI, Azra, RANABHAT, Chhabi Lal, RASELLA, Davide, RASHEDI, Vahid, RAWAL, Lal, REINER JR, Robert C., RENZAHO, Andre M. N., REZAEI, Satar, REZAPOUR, Aziz, RIAHI, Seyed Mohammad, RIBEIRO, Ana Isabel, ROEVER, Leonardo, RORO, Elias Merdassa, ROSER, Max, ROSHANDEL, Gholamreza, ROSHANI, Daem, ROSTAMI, Ali, RUBAGOTTI, Enrico, RUBINO, Salvatore, SABOUR, Siamak, SADAT, Nafis, SADEGHI, Ehsan, SAEEDI, Reza, SAFARI, Yahya, SAFARI-FARAMANI, Roya, SAFDARIAN, Mahdi, SAHEBKAR, Amirhossein, SALAHSHOOR, Mohammad Reza, SALAM, Nasir, SALAMATI, Payman, SALEHI, Farkhonde, ZAHABI, Saleh Salehi, SALIMI, Yahya, SALIMZADEH, Hamideh, SALOMON, Joshua A., SAMBALA, Evanson Zondani, SAMY, Abdallah M., SANTRIC MILICEVIC, Milena M., JOSE, Bruno Piassi Sao, SARASWATHY, Sivan Yegnanarayana Iyer, SARMIENTO-SUÁREZ, Rodrigo, SARTORIUS, Benn, SATHIAN, Brijesh, SAXENA, Sonia, SBARRA, Alyssa N., SCHAEFFER, Lauren E., SCHWEBEL, David C., SEPANLOU, Sadaf G., SEYEDMOUSAVI, Seyedmojtaba, SHAAHMADI, Faramarz, SHAIKH, Masood Ali, SHAMS-BEYRANVAND, Mehran, SHAMSHIRIAN, Amir, SHAMSIZADEH, Morteza, SHARAFI, Kiomars, SHARIF, Mehdi, SHARIF-ALHOSEINI, Mahdi, SHARIFI, Hamid, SHARMA, Jayendra, SHARMA, Rajesh, SHEIKH, Aziz, SHIELDS, Chloe, SHIGEMATSU, Mika, SHIRI, Rahman, SHIUE, Ivy, SHUVAL, Kerem, SIDDIQI, Tariq J., SILVA, João Pedro, SINGH, Jasvinder A., SINHA, Dharendra Narain, SISAY, Malede Mequanent, SISAY, Solomon, SLIWA, Karen, SMITH, David L., SOMAYAJI, Ranjani, SOOFI, Moslem, SORIANO, Joan B., SREERAMAREDDY, Chandrashekhar T., SUDARYANTO, Agus, SUFIYAN, Mu'awiyah Babale, SYKES, Bryan L., SYLAJA, P. N., TABARÉS-SEISDEDOS, Rafael, TABB, Karen M., TABUCHI, Takahiro, TAVEIRA, Nuno, TEMSAH, Mohamad-Hani, TERKAWI, Abdullah Sulieman, TESSEMA, Zemenu Tadesse, THANKAPPAN, Kavumpurathu Raman, THIRUNAVUKKARASU, Sathish, TO, Quyen G., TOVANI-PALONE, Marcos Roberto, TRAN, Bach Xuan, TRAN, Khanh Bao, ULLAH, Irfan, USMAN, Muhammad Shariq, UTHMAN, Olalekan A., VAHEDIAN-AZIMI, Amir, VALDEZ, Pascual R., VAN BOVEN, Job F. M., VASANKARI, Tommi Juhani, VASSEGHIAN, Yasser, VEISANI, Yousef, VENKETASUBRAMANIAN, Narayanaswamy, VIOLANTE, Francesco S., VLADIMIROV, Sergey Konstantinovitch, VLASSOV, Vasily, VOS, Theo, VU, Giang Thu, VUJCIC, Isidora S., WAHEED, Yasir, WAKEFIELD, Jon, WANG, Haidong, WANG, Yafeng, WANG, Yuan-Pang, WARD, Joseph L., WEINTRAUB, Robert G., WELDEGWERGS, Kidu Gidey, WELDESAMUEL, Girmay Teklay, WESTERMAN, Ronny, WIYSONGE, Charles Shey, WONDAFRASH, Dawit Zewdu, WOYCZYNSKI, Lauren, WU, Ai-Min, XU, Gelin, YADEGAR, Abbas, YAMADA, Tomohide, YAZDI-FEYZABADI, Vahid, YILGWAN, Christopher Sabo, YIP, Paul, YONEMOTO, Naohiro, LEBNI, Javad Yoosefi, YOUNIS, Mustafa Z., YOUSEFIFARD, Mahmoud, YOUSOF,

Hebat-Allah Salah A., YU, Chuanhua, YUSEFZADEH, Hasan, ZABEH, Erfan, MOGHADAM, Telma Zahirian, BIN ZAMAN, Sojib, ZAMANI, Mohammad, ZANDIAN, Hamed, ZANGENEH, Alireza, ZERFU, Taddese Alemu, ZHANG, Yunquan, ZIAPOUR, Arash, ZODPEY, Sanjay, MURRAY, Christopher J. L. and HAY, Simon I. (2019). Mapping 123 million neonatal, infant and child deaths between 2000 and 2017. *Nature*, 574 (7778), 353-358. [Article]

---

### **Copyright and re-use policy**

See <http://shura.shu.ac.uk/information.html>



In the format provided by the authors and unedited.

# Mapping 123 million neonatal, infant and child deaths between 2000 and 2017

A list of authors and their affiliations appears in the online version of the paper

# Supplementary Information

## Table of Contents

|                                                                                     |    |
|-------------------------------------------------------------------------------------|----|
| Supplementary Figures .....                                                         | 3  |
| Supplementary Tables .....                                                          | 5  |
| 1 Guidelines for Accurate and Transparent Health Estimates Reporting (GATHER) ..... | 6  |
| 2 Methods overview .....                                                            | 8  |
| 3 Data .....                                                                        | 10 |
| 3.1 Geographic inclusion .....                                                      | 10 |
| 3.2 Sources and inclusion .....                                                     | 13 |
| 3.3 Data preparation .....                                                          | 14 |
| 3.3.1 Complete birth histories .....                                                | 14 |
| 3.3.2 Summary birth histories .....                                                 | 14 |
| 3.4 Polygon resampling .....                                                        | 22 |
| 4 Covariates and auxiliary data .....                                               | 22 |
| 4.1 Description of layers and justification .....                                   | 22 |
| 4.2 Spatial and temporal standardization .....                                      | 24 |
| 4.3 Administrative boundaries .....                                                 | 26 |
| 4.4 Gridded population data .....                                                   | 26 |
| 5 Statistical model .....                                                           | 26 |
| 5.1 Geostatistical model .....                                                      | 26 |
| 5.1.1 Model results .....                                                           | 28 |
| 5.2 Post-estimation .....                                                           | 31 |
| 5.2.1 Combining age groups .....                                                    | 31 |
| 5.2.2 Calculating numbers of deaths .....                                           | 32 |
| 5.2.3 Masking grid-cell-level estimates .....                                       | 32 |
| 5.2.4 Summarizing results and aggregating to administrative subdivisions .....      | 32 |
| 5.2.5 Calibration with Global Burden of Disease 2017 .....                          | 33 |
| 5.3 Validation .....                                                                | 40 |
| 5.3.1 Validation results .....                                                      | 40 |
| 5.4 Other diagnostics .....                                                         | 66 |
| 5.4.1 Comparison with previous analysis .....                                       | 66 |

|    |       |                                                            |     |
|----|-------|------------------------------------------------------------|-----|
| 33 | 5.4.2 | Covariates out of range.....                               | 73  |
| 34 | 5.4.3 | National-level time series plots .....                     | 75  |
| 35 | 5.4.4 | Migration sensitivity analysis.....                        | 81  |
| 36 | 5.4.5 | Sources of reductions in deaths.....                       | 92  |
| 37 | 5.4.6 | Incorporating uncertainty into estimates of progress ..... | 95  |
| 38 | 6     | Additional results .....                                   | 96  |
| 39 | 7     | References .....                                           | 110 |
| 40 | 8     | Data sources.....                                          | 113 |
| 41 |       |                                                            |     |
| 42 |       |                                                            |     |
| 43 |       |                                                            |     |

## Supplementary Figures

|    |                                                                                                             |    |
|----|-------------------------------------------------------------------------------------------------------------|----|
| 44 |                                                                                                             |    |
| 45 |                                                                                                             |    |
| 46 | Supplementary Figure 3.1: Countries included in this analysis and modelling regions .....                   | 10 |
| 47 | Supplementary Figure 3.2: Survey data coverage for Africa (with Yemen), 2000–2017.....                      | 17 |
| 48 | Supplementary Figure 3.3: Survey data coverage for Latin America, 2000–2017 .....                           | 18 |
| 49 | Supplementary Figure 3.4: Survey data coverage for Western and Central Asia, 2000–2017 .....                | 19 |
| 50 | Supplementary Figure 3.5: Survey data coverage for Southeast Asia and Oceania, 2000–2017.....               | 20 |
| 51 | Supplementary Figure 3.6: Survey data coverage for South Asia, 2000–2017.....                               | 21 |
| 52 | Supplementary Figure 4.1: Maps of the covariates used .....                                                 | 23 |
| 53 | Supplementary Figure 5.1: Fitted estimates of covariate coefficients across the 12 model regions.....       | 30 |
| 54 | Supplementary Figure 5.2: Posterior hyper-parameter fits across the 12 model regions .....                  | 31 |
| 55 | Supplementary Figure 5.3: Pre- and post-calibration comparisons, national level GBD, under-5.....           | 34 |
| 56 | Supplementary Figure 5.4: Pre- and post-calibration comparisons, national-level GBD, infant.....            | 35 |
| 57 | Supplementary Figure 5.5: Pre- and post-calibration comparisons, national level GBD, neonatal .....         | 36 |
| 58 | Supplementary Figure 5.6: Pre- and post-calibration comparisons, subnational level GBD, under-5 .....       | 37 |
| 59 | Supplementary Figure 5.7: Pre- and post-calibration comparisons, subnational-level GBD, infant .....        | 38 |
| 60 | Supplementary Figure 5.8: Pre- and post-calibration comparisons, subnational-level GBD, neonatal .....      | 39 |
| 61 | Supplementary Figure 5.9: In-sample predictions versus aggregated data at the country level .....           | 42 |
| 62 | Supplementary Figure 5.10: Out-of-sample predictions vs. aggregated data at the country level .....         | 46 |
| 63 | Supplementary Figure 5.11: In-sample predictions vs. aggregated data at the first administrative level..... | 50 |
| 64 | Supplementary Figure 5.12: Out-of-sample predictions vs. aggregated data at the first administrative        |    |
| 65 | level.....                                                                                                  | 54 |
| 66 | Supplementary Figure 5.13: In-sample predictions vs. aggregated data at the second administrative level     |    |
| 67 | .....                                                                                                       | 58 |
| 68 | Supplementary Figure 5.14: Out-of-sample predictions vs. aggregated data at the second administrative       |    |
| 69 | level.....                                                                                                  | 62 |
| 70 | Supplementary Figure 5.15: Comparison between mean second administrative level estimates of under-          |    |
| 71 | 5 mortality probability between current and previous analysis.....                                          | 67 |
| 72 | Supplementary Figure 5.16: Comparison between mean second administrative level estimates of                 |    |
| 73 | neonatal mortality probability between current and previous analysis .....                                  | 68 |
| 74 | Supplementary Figure 5.17: Relative difference between current and previous estimates of under-5            |    |
| 75 | mortality probability, 2015 .....                                                                           | 69 |
| 76 | Supplementary Figure 5.18: Difference between current and previous estimates of under-5 mortality           |    |
| 77 | probability, 2015 .....                                                                                     | 70 |
| 78 | Supplementary Figure 5.19: Second administration units with significant difference between current and      |    |
| 79 | previous estimates of under-5 mortality probability, 2015.....                                              | 71 |
| 80 | Supplementary Figure 5.20: Percentage of the population living outside of the training data range of at     |    |
| 81 | least one covariate.....                                                                                    | 74 |
| 82 | Supplementary Figure 5.21: Grid cells with covariate values outside the range of values observed in the     |    |
| 83 | model training data.....                                                                                    | 75 |
| 84 | Supplementary Figure 5.22: Raw data aggregates and estimated trends before calibration to GBD,              |    |
| 85 | under-5 mortality probability, 2000 to 2017 .....                                                           | 76 |



|     |                                                                                                                                                                                                                                     |     |
|-----|-------------------------------------------------------------------------------------------------------------------------------------------------------------------------------------------------------------------------------------|-----|
| 86  | Supplementary Figure 5.23: Raw data aggregates and estimated trends after calibration to GBD, under-5 mortality probability, 2000 to 2017 .....                                                                                     | 77  |
| 87  |                                                                                                                                                                                                                                     |     |
| 88  | Supplementary Figure 5.24: Raw data aggregates and estimated trends before calibration to GBD, infant mortality probability, 2000 to 2017 .....                                                                                     | 78  |
| 89  |                                                                                                                                                                                                                                     |     |
| 90  | Supplementary Figure 5.25: Raw data aggregates and estimated trends after calibration to GBD, infant mortality probability, 2000 to 2017 .....                                                                                      | 79  |
| 91  |                                                                                                                                                                                                                                     |     |
| 92  | Supplementary Figure 5.26: Raw data aggregates and estimated trends before calibration to GBD, neonatal mortality probability, 2000 to 2017 .....                                                                                   | 80  |
| 93  |                                                                                                                                                                                                                                     |     |
| 94  | Supplementary Figure 5.27: Raw data aggregates and estimated trends after calibration to GBD, neonatal mortality probability, 2000 to 2017 .....                                                                                    | 81  |
| 95  |                                                                                                                                                                                                                                     |     |
| 96  | Supplementary Figure 5.28: National-level trends, comparing estimates made using the full survey of respondents, versus keeping only those children born in current residence .....                                                 | 82  |
| 97  |                                                                                                                                                                                                                                     |     |
| 98  | Supplementary Figure 5.29: Map and scatterplot comparisons between full data and a subset of those who did not move, Bangladesh, 2007. Second administrative area R-squared for years 2000, 2010, and 2017 = 0.89, 0.96, 0.90 ..... | 83  |
| 99  |                                                                                                                                                                                                                                     |     |
| 100 | Supplementary Figure 6.1: Second administrative subdivisions with a significant decline in neonatal mortality probability between 2000 and 2017 .....                                                                               | 97  |
| 101 |                                                                                                                                                                                                                                     |     |
| 102 | Supplementary Figure 6.2: Second administrative subdivisions with a significant decline in infant mortality probability between 2000 and 2017 .....                                                                                 | 98  |
| 103 |                                                                                                                                                                                                                                     |     |
| 104 | Supplementary Figure 6.3: Second administrative subdivisions with a significant decline in under-5 mortality probability between 2000 and 2017 .....                                                                                | 99  |
| 105 |                                                                                                                                                                                                                                     |     |
| 106 | Supplementary Figure 6.4: Percentage of under-5 deaths in each bin of under-5 mortality probability that occur in the indicated world regions .....                                                                                 | 100 |
| 107 |                                                                                                                                                                                                                                     |     |
| 108 | Supplementary Figure 6.5: Posterior probability of having met the SDG 3.2 target of 12 deaths per 1,000 live births for neonatal mortality probability in 2017 .....                                                                | 101 |
| 109 |                                                                                                                                                                                                                                     |     |
| 110 | Supplementary Figure 6.6: Under-5 mortality probability by second administrative subdivision projected to 2030 .....                                                                                                                | 102 |
| 111 |                                                                                                                                                                                                                                     |     |
| 112 | Supplementary Figure 6.7: Under-5 mortality probability by second administrative subdivision in 2000, normalized to the mean under-5 mortality probability within each country .....                                                | 103 |
| 113 |                                                                                                                                                                                                                                     |     |
| 114 | Supplementary Figure 6.8: Under-5 mortality probability by second administrative subdivision in 2017, normalized to the mean under-5 mortality probability within each country .....                                                | 104 |
| 115 |                                                                                                                                                                                                                                     |     |
| 116 | Supplementary Figure 6.9: Number of under-5 deaths, distributed across level of under-5 mortality rate in 2017 across 100 countries .....                                                                                           | 106 |
| 117 |                                                                                                                                                                                                                                     |     |
| 118 | Supplementary Figure 6.10: Point data availability per pixel by modeling region, 2000–2017 .....                                                                                                                                    | 107 |
| 119 |                                                                                                                                                                                                                                     |     |
| 120 | Supplementary Figure 6.11: Point data availability per pixel by modeling region, 2000–2017, after dropping observations .....                                                                                                       | 108 |
| 121 |                                                                                                                                                                                                                                     |     |
| 122 | Supplementary Figure 6.12: Change in absolute and relative inequalities in under-5 mortality rate across second administrative level units between 2000 and 2017. ....                                                              | 109 |
| 123 |                                                                                                                                                                                                                                     |     |
| 124 |                                                                                                                                                                                                                                     |     |

|     |                                                                                                     |     |
|-----|-----------------------------------------------------------------------------------------------------|-----|
| 125 | Supplementary Tables                                                                                |     |
| 126 | Supplementary Table 1.1: GATHER Compliance .....                                                    | 7   |
| 127 | Supplementary Table 3.1: Countries included in the analysis (99) grouped by modelling regions. .... | 11  |
| 128 | Supplementary Table 4.1: Geospatial covariate citations .....                                       | 24  |
| 129 | Supplementary Table 5.1: High-level summary of validation metrics by administrative level .....     | 41  |
| 130 | Supplementary Table 5.2: High-level summary of validation metrics by age bin .....                  | 41  |
| 131 | Supplementary Table 5.3: Data sources added in SSA countries since the previous analysis .....      | 72  |
| 132 | Supplementary Table 8.1: Data sources included in analysis .....                                    | 113 |
| 133 | Supplementary Table 8.2: Data sources excluded from analysis, with rationale .....                  | 187 |
| 134 |                                                                                                     |     |

# 1 Guidelines for Accurate and Transparent Health Estimates Reporting (GATHER)

| Item #                        | Checklist item                                                                                                                                                                                                                                                                                                                                                                            | Location                                                                                                                                     |
|-------------------------------|-------------------------------------------------------------------------------------------------------------------------------------------------------------------------------------------------------------------------------------------------------------------------------------------------------------------------------------------------------------------------------------------|----------------------------------------------------------------------------------------------------------------------------------------------|
| <b>Objectives and funding</b> |                                                                                                                                                                                                                                                                                                                                                                                           |                                                                                                                                              |
| 1                             | Define the indicator(s), populations (including age, sex, and geographic entities), and time period(s) for which estimates were made.                                                                                                                                                                                                                                                     | Introduction                                                                                                                                 |
| 2                             | List the funding sources for the work.                                                                                                                                                                                                                                                                                                                                                    | Main Manuscript                                                                                                                              |
|                               |                                                                                                                                                                                                                                                                                                                                                                                           |                                                                                                                                              |
| 3                             | Describe how the data were identified and how the data were accessed.                                                                                                                                                                                                                                                                                                                     | SI Section 3                                                                                                                                 |
| 4                             | Specify the inclusion and exclusion criteria. Identify all ad-hoc exclusions.                                                                                                                                                                                                                                                                                                             | SI Section 6.1<br>Suppl Tables 8.1, 8.2                                                                                                      |
| 5                             | Provide information on all included data sources and their main characteristics. For each data source used, report reference information or contact name/institution, population represented, data collection method, year(s) of data collection, sex and age range, diagnostic criteria or measurement method, and sample size, as relevant.                                             | Suppl Table 8.1                                                                                                                              |
| 6                             | Identify and describe any categories of input data that have potentially important biases (e.g., based on characteristics listed in item 5).                                                                                                                                                                                                                                              | Suppl Section 6.2                                                                                                                            |
|                               |                                                                                                                                                                                                                                                                                                                                                                                           |                                                                                                                                              |
| 7                             | Describe and give sources for any other data inputs.                                                                                                                                                                                                                                                                                                                                      | Suppl Section 4                                                                                                                              |
|                               |                                                                                                                                                                                                                                                                                                                                                                                           |                                                                                                                                              |
| 8                             | Provide all data inputs in a file format from which data can be efficiently extracted (e.g., a spreadsheet rather than a PDF), including all relevant meta-data listed in item 5. For any data inputs that cannot be shared because of ethical or legal reasons, such as third-party ownership, provide a contact name or the name of the institution that retains the right to the data. | Suppl Table 8.1 and with IDs to links of full source metadata and download links available at <a href="http://www.ghdx.org">www.ghdx.org</a> |
|                               |                                                                                                                                                                                                                                                                                                                                                                                           |                                                                                                                                              |
| 9                             | Provide a conceptual overview of the data analysis method. A diagram may be helpful.                                                                                                                                                                                                                                                                                                      | Extended Data Figure 5                                                                                                                       |
| 10                            | Provide a detailed description of all steps of the analysis, including mathematical formulae. This description should cover, as relevant, data cleaning, data pre-processing, data adjustments and weighting of data sources, and mathematical or statistical model(s).                                                                                                                   | Supple Sections 3, 4, 5                                                                                                                      |
| 11                            | Describe how candidate models were evaluated and how the final model(s) were selected.                                                                                                                                                                                                                                                                                                    | Suppl Section 5                                                                                                                              |
| 12                            | Provide the results of an evaluation of model performance, if done, as well as the results of any relevant sensitivity analysis.                                                                                                                                                                                                                                                          | Suppl Section 5                                                                                                                              |

|                               |                                                                                                                                                                  |                                                                                                                                                |
|-------------------------------|------------------------------------------------------------------------------------------------------------------------------------------------------------------|------------------------------------------------------------------------------------------------------------------------------------------------|
| 13                            | Describe methods for calculating uncertainty of the estimates. State which sources of uncertainty were, and were not, accounted for in the uncertainty analysis. | Suppl Section 5                                                                                                                                |
| 14                            | State how analytic or statistical source code used to generate estimates can be accessed.                                                                        | Source code available here:<br><a href="https://github.com/ihmeuw/lbd/tree/u5m-lmic-2019">https://github.com/ihmeuw/lbd/tree/u5m-lmic-2019</a> |
| <b>Results and Discussion</b> |                                                                                                                                                                  |                                                                                                                                                |
| 15                            | Provide published estimates in a file format from which data can be efficiently extracted.                                                                       | Raster and csv files to be made available on <a href="http://www.ghdx.org">www.ghdx.org</a>                                                    |
| 16                            | Report a quantitative measure of the uncertainty of the estimates (e.g. uncertainty intervals).                                                                  | Throughout Main Manuscript                                                                                                                     |
| 17                            | Interpret results in light of existing evidence. If updating a previous set of estimates, describe the reasons for changes in estimates.                         | Introduction in main manuscript                                                                                                                |
| 18                            | Discuss limitations of the estimates. Include a discussion of any modelling assumptions or data limitations that affect interpretation of the estimates.         | Main discussion, as well as limitations section in Methods                                                                                     |

*Supplementary Table 1.1: GATHER Compliance*



## 2 Methods overview

Our analytical process generally followed that of our previous work to map under-5 mortality probabilities<sup>1</sup>, diarrhea prevalence<sup>2</sup>, child growth failure<sup>3</sup>, and educational attainment<sup>4</sup> with several key exceptions and methodological advancements. Extended Data Figure 5 is a flow diagram which summarizes the analytical process we used. In this introductory section we give a broad overview of the analytical process.

The aim of this analysis was to produce joint estimates, with uncertainty, of the probability of death for children aged 0-28 days (neonates), children under 1 (infants), and children under 5, as well as estimates of the numbers of deaths for these age groups, at the subnational level for 99 low- and middle-income countries for each year from 2000 to 2017. Estimates were made using a statistical model that was continuous in space, and prediction was done at a grid-cell resolution of approximately 5 x 5 kilometers, and reported at the first and second administrative level, as well as at the country level.

We use the term mortality *probability* to describe the number of deaths per live births (typically in terms of 1,000 live births). This is the quantity we model and discuss in the paper. In standard demographic notation, mortality probability for under-5s is referred to as *5q0*. Often, it is colloquially acceptable to use the term mortality *rate* for this measure, as we did in the main manuscript. These have technically different definitions; mortality rate refers to deaths per person-years lived. Since we make use of both mortality probabilities and rates in our analytical processing, for the purpose of clarity we will not use these terms interchangeably in describing our methodology.

We extracted individual records from 549 household and census sources. Records were gathered either in the form of summary birth histories (SBHs) or complete birth histories (CBHs). SBH data are at the woman level, while CBH data are at the child level. In one country we also used surveillance data (see Supplementary Section 3.3). Data preparation differed for these two types: sample sizes and number of death events over time and age could be tabulated directly for CBH data, while SBH data were prepared in accordance with indirect methods developed and validated previously by Burstein and colleagues<sup>5</sup>. All data observations were geo-referenced to either GPS locations (points) or areal units. Areal data were converted to pseudo-points and weighted based on spatial population distributions. Our combined global dataset contained 15.9 million records, each representing a mortality estimate (number of deaths and sample size) for a location, age, and time period. See Supplementary Section 3 for more details on data preparation.

We extracted values from each of 10 geospatial covariates at each data point. Geospatial covariates are spatial data which are represented at the 5 x 5-km grid-cell resolution. Covariates typically have global spatial coverage and values that vary each year. See Supplementary Section 4 for more information about the covariates used in this analysis.

In order to synthesize information across various sources, and to make consistent estimates across space and time, we fit discrete hazards geostatistical models to binomial data. The model explicitly accounted for variation across age bin, time, and space through inclusion of both fixed and random effects. Indicator variables for each age bin were included to form a discrete baseline mortality hazard function. Baseline hazard functions are allowed to vary in space and time in response to changing covariate values, as well as a linear effect on a secular time trend. We included a Gaussian random effect across countries to account for larger-scale variations due to political or institutional effects. We also

included Gaussian random effects for each data source to account for source-specific biases. Finally, we included a Gaussian process random effect with a covariance matrix structured to account for correlation across age, time, and physical space. As such, estimates at a specific age, time, or place benefit from drawing predictive strength from data points which are nearby in any of these dimensions. We assigned priors to all model parameters and performed maximum a posteriori (MAP) inference using Template Model Builder<sup>6</sup> (TMB) software in R version 3.4. See Supplementary Section 5 for more details on the statistical model.

To assess the predictive performance of our model performance, we implemented a cross-validation procedure. We reran the model five times, holding out 20% of data sources each time, and produced estimates for the held-out data. Using this out of sample data as a basis for comparison, we estimated a number of predictive validity metrics including root mean squared error, correlation, mean error, and 95% coverage. See Supplementary Section 5 for more details on model performance.

From the fitted model parameters, we produce predictive posterior mortality estimates for each age group at each 5 x 5 kilometer grid cell for each year 2000 through 2017. We also supplemented these estimates with grid-cell-level population data in order to estimate the number of deaths occurring in each age group at each location in time. We ensured that at the national level, aggregated estimates for each age group and year are calibrated such that they equal estimates in the Global Burden of Disease (GBD) study. See Supplementary Section 5 for more details on post-estimation procedures.

In the subsequent sections of this document, we provide details on each step of this analytical process.

## 3 Data

### 3.1 Geographic inclusion

Countries were selected for inclusion in this analysis using the Socio-Demographic Index (SDI) published in the GBD<sup>7</sup>. The SDI is a measure of development that combines education, fertility, and income. We primarily aimed to include all countries in the middle, low-middle, or low SDI quintiles, with several exceptions. Brazil and Mexico were excluded despite middle SDI status due to the availability of high-quality vital registration (VR) data in these countries which have served as the basis for existing subnational estimates of child mortality. Because this study did not incorporate vital registration data sources (see “Limitations”), Brazil and Mexico were not estimated directly; instead, state-level estimates from the Global Burden of Disease 2017 study were directly substituted where appropriate. As countries with high-middle SDI status in 2017, China and Malaysia were excluded from this analysis. Albania and Moldova were excluded despite middle SDI status due to geographic discontinuity with other included countries and lack of available survey data. Libya was included despite high-middle SDI status to create better geographic continuity. Island nations with populations under 1 million were excluded because they typically lacked sufficient survey data or geographic continuity for a geospatial analytic approach to be advantageous over a national one. North Korea was excluded due to insufficient data. In all, 99 countries were included in this analysis. Supplementary Figure 3.1 shows a map of the countries included in this study, and Supplementary Table 3.2 lists the countries.

*Supplementary Figure 3.1: Countries included in this analysis and modelling regions*

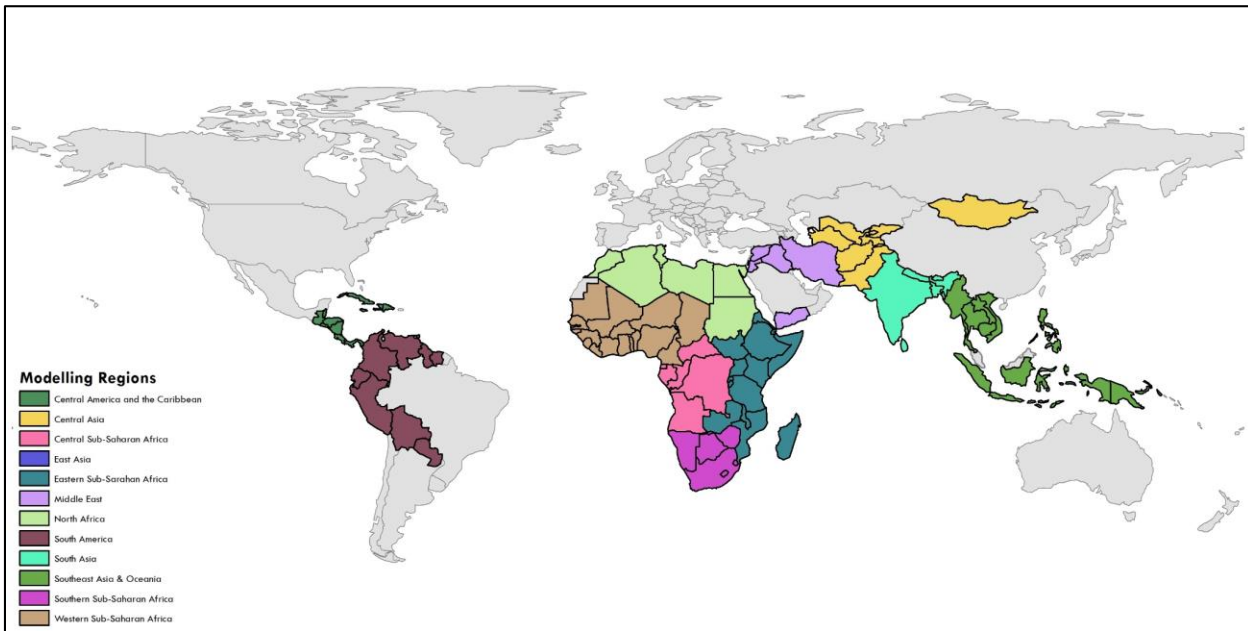

| Region Name                              | Countries                                                                                                                                                                | ISO3 Code                                                                                             |
|------------------------------------------|--------------------------------------------------------------------------------------------------------------------------------------------------------------------------|-------------------------------------------------------------------------------------------------------|
| <b>Central America and the Caribbean</b> | Belize<br>Costa Rica<br>Cuba<br>Dominican Republic<br>El Salvador<br>Guatemala<br>Haiti<br>Honduras<br>Jamaica<br>Nicaragua<br>Panama                                    | BLZ<br>CRI<br>CUB<br>DOM<br>SLV<br>GTM<br>HTI<br>HND<br>JAM<br>NIC<br>PAN                             |
| <b>Central Asia</b>                      | Afghanistan<br>Kyrgyzstan<br>Pakistan<br>Tajikistan<br>Turkmenistan<br>Uzbekistan<br>Mongolia                                                                            | AFG<br>KGZ<br>PAK<br>TJK<br>TKM<br>UZB<br>MNG                                                         |
| <b>Central sub-Saharan Africa</b>        | Angola<br>Central African Republic<br>Democratic Republic of the Congo<br>Equatorial Guinea<br>Gabon<br>Republic of the Congo                                            | AGO<br>CAF<br>COD<br><br>GNQ<br>GAB<br>COG                                                            |
| <b>Eastern sub-Saharan Africa</b>        | Burundi<br>Comoros<br>Djibouti<br>Eritrea<br>Ethiopia<br>Kenya<br>Madagascar<br>Malawi<br>Mozambique<br>Rwanda<br>Somalia<br>South Sudan<br>Tanzania<br>Uganda<br>Zambia | BDI<br>COM<br>DJI<br>ERI<br>ETH<br>KEN<br>MDG<br>MWI<br>MOZ<br>RWA<br>SOM<br>SSD<br>TZA<br>UGA<br>ZMB |
| <b>Middle East</b>                       | Iran                                                                                                                                                                     | IRN                                                                                                   |



|                                    |                                                                                                                   |                                                             |
|------------------------------------|-------------------------------------------------------------------------------------------------------------------|-------------------------------------------------------------|
|                                    | Iraq<br>Jordan<br>Palestine<br>Syria<br>Yemen                                                                     | IRQ<br>JOR<br>PSE<br>SYR<br>YEM                             |
| <b>North Africa</b>                | Algeria<br>Egypt<br>Libya<br>Morocco<br>Sudan<br>Tunisia                                                          | DZA<br>EGY<br>LBY<br>MAR<br>SDN<br>TUN                      |
| <b>South America</b>               | Bolivia<br>Colombia<br>Ecuador<br>Peru<br>Trinidad and Tobago<br>Venezuela<br>Guyana<br>Paraguay<br>Suriname      | BOL<br>COL<br>ECU<br>PER<br>TTO<br>VEN<br>GUY<br>PRY<br>SUR |
| <b>South Asia</b>                  | Bangladesh<br>Bhutan<br>India<br>Sri Lanka<br>Nepal                                                               | BGD<br>BTN<br>IND<br>LKA<br>NEP                             |
| <b>Southeast Asia and Oceania</b>  | Indonesia<br>Papua New Guinea<br>Philippines<br>Timor-Leste<br>Cambodia<br>Laos<br>Myanmar<br>Thailand<br>Vietnam | IDN<br>PNG<br>PHL<br>TLS<br>KHM<br>LAO<br>MMR<br>THA<br>VNM |
| <b>Southern sub-Saharan Africa</b> | Botswana<br>Lesotho<br>Namibia<br>South Africa<br>Swaziland<br>Zimbabwe                                           | BWA<br>LSO<br>NAM<br>ZAF<br>SWZ<br>ZWE                      |
| <b>Western sub-Saharan Africa</b>  | Benin<br>Burkina Faso<br>Cameroon<br>Cape Verde                                                                   | BEN<br>BFA<br>CMR<br>CPV                                    |

|  |                       |     |
|--|-----------------------|-----|
|  | Chad                  | TCD |
|  | Côte d'Ivoire         | CIV |
|  | Ghana                 | GHA |
|  | Guinea                | GIN |
|  | Guinea-Bissau         | GNB |
|  | Liberia               | LBR |
|  | Mali                  | MLI |
|  | Mauritania            | MRT |
|  | Niger                 | NER |
|  | Nigeria               | NGA |
|  | Sao Tome and Principe | STP |
|  | Senegal               | SEN |
|  | Sierra Leone          | SLE |
|  | The Gambia            | GMB |
|  | Togo                  | TGO |

224

225

## 226 3.2 Sources and inclusion

227 Data sources were identified with a search of the global health data exchange (GHDx:  
228 <http://ghdx.healthdata.org/>) with the following keywords: "complete birth history", "summary birth  
229 history", "child mortality", and "infant mortality". This search was repeated periodically to capture newly  
230 released data sources. GHDx search was accompanied by bespoke searches on country statistical  
231 websites for potential sources not listed or tagged in the GHDx. We used complete or summary birth  
232 history data contained in household surveys or censuses that were available as microdata (individual-  
233 level data) and collected from 2000 or later. We use complete birth histories only in surveys that have  
234 both complete and summary birth histories since complete birth histories are more detailed and to  
235 avoid using the same data twice. For each data source we produced a data quality report. Data sources  
236 were excluded based on screening for missingness and unexpected trends in several variables. Sources  
237 were excluded due to missingness greater than 10% in date of birth or death and children ever born or  
238 died, unrealistic geographic trends compared to other surveys in nearby country-years, inability to  
239 match the microdata to geographic locations, or non-standard methodology.

240 The sources included for analysis are listed in Supplementary Table 8.1. In total, we identified 209  
241 summary birth history and 258 complete birth history data sources which were included in the analytical  
242 process. In addition, we identified 82 data sources which we ultimately chose not to include in the  
243 analysis. A list of these sources with justification notes for exclusion is available in Supplementary Table  
244 8.2. Supplementary Figures 3.3 through 3.7 show the spatial data coverage of data by country.

245

### 3.3 Data preparation

#### 3.3.1 Complete birth histories

Complete birth histories (CBH) capture detailed vital event histories of children, as reported retrospectively by their mothers. CBH surveys include information about the month and year of birth, as well as the age of death if applicable for each child born to responding mothers. Data on life and mortality experiences from CBH sources can be tabulated directly into discrete period and age bins, thus allowing for age- and period-specific mortality estimation, known as the synthetic cohort method<sup>8–10</sup>. We refer to data tabulated for a specific period and age as period-age-binned.

For this study, we used 18 annual period bins from 2000 to 2017, and seven age bins. Age bins were defined as follows: Neonatal (NN; [live birth – 1 month]), Post-neonatal 1 (PNN1; [1 month – 6 months]), Post-neonatal 2 (PNN2; [6 months – 1 year]), 1 year olds (1yr; [1 year – 2 years]), 2 year olds (2yr; [2 years – 3 years]), 3 year olds (3yr; [3 years – 4 years]), 4 year olds [4 years – 5 years]). Thus, one child can supply information toward up to seven age bins. Each child entering a period-age bin counts toward the sample size of that age bin (unless the child entered the age bin more recently than the length of the age bin, in which case they were censored). If a child died within a period-age bin, that death is recorded as occurring in that bin. The ratio of deaths within to number entering can thus be considered an estimate of the probability of death in that age bin, conditional on entering the age bin. This is the same as the lifetable quantity  $q_a$  for age bin  $a$ .<sup>11</sup>

For survey clusters, we tabulated deaths and number entering directly. For areal units, we used survey weights, if provided, to estimate a mortality probability for each component period-age bin, which was then multiplied by the sample size of the period-bin within the areal unit to get an estimate of numbers of deaths.

#### 3.3.2 Summary birth histories

Summary birth histories (SBHs) are widely collected in censuses and household surveys. In an SBH, a respondent (typically the mother), is asked about how many live births she has had (children ever born, CEB), and how many of her children have died (CD). There is no additional information given about the timing of births or deaths, and as such, an additional inferential step is needed in order to estimate mortality probabilities and assign them to specific time period. This step is broadly referred to as indirect estimation.<sup>11</sup>

We prepared summary birth histories in accordance with the methods detailed in the paper by Burstein and colleagues.<sup>5</sup> We describe the method briefly here but refer readers to that paper for details.

A discrete time generalized additive hazard model was trained using individual-level data from 243 Demographic and Health Surveys (DHSs). The model was fit on CBH data but using covariates also available from SBH data (mother's age, CEB, CD/CEB, and national-level covariates). SBH data were then applied to the fitted model to make predictions of discrete hazard curves for all hypothetical children

potentially ever born to mothers reporting in SBH. Discrete hazard curves were set up to have breaks at the same seven age bins used for tabulation of CBH data. Each of these hypothetical children is given a weight based on their probability of birth (given their mother's age, total fertility, and region of residence). Hazard curves were turned into age-period-specific estimates of mortality by taking weighted means across all hypothetical children living in a survey cluster or administrative area. In addition, weights were summed over these area-age-bins to approximate sample sizes.

### 3.3.2.1 Calculating effective sample sizes for summary birth history observations

To account for the fact that summary birth history data arose from modelled indirect estimates, we used a three-step simulation procedure to calculate an effective sample size for each SBH data point based on uncertainty from predictions and out-of-sample uncertainty as calculated by Burstein and colleagues<sup>5</sup>.

We applied the age-specific indirect estimation method described by Burstein and colleagues to all 209 SBH datasets used in the paper, producing an estimate of mortality probability ( $\hat{p}$ ) and sample size ( $\hat{N}$ ) for each area-age-period bin from each survey (notated as  $s$ ,  $a$ ,  $t$ , and  $k$ , respectively). We refer to areas as the smallest available geography from each survey, typically a cluster or a second administrative or first administrative unit. Sample sizes represented estimates of the number of children expected to enter each area-age-period bin, estimates of  $\hat{N}$  were deterministic based on Burstein and colleagues' method, but  $\hat{p}$  arose from a statistical model, and thus uncertainty in fitted model parameters was propagated into estimates of  $\hat{p}$ . For each  $\hat{p}_{k,a,s,t}$  we extracted 1000 predictive draws from the model by simulating from a multivariate Gaussian distribution using the mean vector and variance-covariance matrix of all estimated model parameters. Furthermore, modelled estimates could deviate from the truth for various reasons not captured in model uncertainty. This added variance can be estimated by comparing model estimates to out of sample empirical validation data. This procedure was done as part of the subnational validation by Burstein and colleagues where they performed leave-one (survey)-out validation for each of the 243 DHSs used to train the complete model. To account for this additional error within each age bin, we first estimated the error with the relative residual error terms ( $cv$ ) for each of the seven age bins. The value  $cv_a$  for each of the seven age-bins was calculated across all surveys as  $SD(\text{logit}(\hat{p}_{k,a,t}) - \text{logit}(p_{k,a,t}^{oos}))/\text{mean}(\text{logit}(\hat{p}_{k,a,t}))$ , where  $\hat{p}_{k,a,t}$  is the model estimate for age bin  $a$  from survey  $k$  and  $p_{k,a,t}^{oos}$  is the empirical estimate for the same survey held out of sample (i.e., the validation data).

In the first step, we incorporated this out of sample residual error into each estimate of  $\hat{p}_{k,a,s,t}$  via simulation. This was done for each draw of each area-age-bin estimate, in logit space to constrain estimates from 0 to 1, by simulating:  $\text{logit}(\hat{p}_{k,a,s,t}^{\text{inflated}}) \sim \text{Normal}(\text{logit}(\hat{p}_{k,a,s,t}), \text{logit}(\hat{p}_{k,a,s,t}) * cv_a)$ .

In the second step we simulated numbers of deaths for each area-age-period bin for each of the 1000 draws:  $\hat{Y}_{k,a,s,t}^{\text{inflated}} \sim \text{Binomial}(\hat{p}_{k,a,s,t}^{\text{inflated}}, \hat{N}_{k,a,s,t}^{\text{inflated}})$ .

In the third step, we calculated the effective sample size for each area-age-period bin by assuming that  $\hat{Y}_{k,a,s,t}^{\text{inflated}}$  arose from a beta-binomial distribution. The beta-binomial distribution was chosen because it assumes a fixed sample size ( $\hat{N}$ ), but a variable probability, accounting for model and residual uncertainty we had incorporated into  $\hat{p}_{k,a,s,t}^{\text{inflated}}$  (and thus  $\hat{Y}_{k,a,s,t}^{\text{inflated}}$ ) via simulation in the first two steps. In our geostatistical model (see Supplementary Section 5), we use a binomial data likelihood, so our

interest was in finding an effective sample size for a binomial distribution with the same variance as a  
 beta-binomial distribution for each area-age-period observation. Across the draws for each  $\hat{Y}_{k,a,s,t}^{\text{inflated}}$  we  
 first calculated the beta-binomial parameters  $\hat{\alpha}_{k,a,s,t}$  and  $\hat{\beta}_{k,a,s,t}$  using method of moments. We then  
 used the variance equation for a beta-binomial to calculate the variance as  $\text{Var}(\hat{Y}_{k,a,s,t}^{\text{inflated}} / \hat{N}_{k,a,s,t}) =$   

$$\frac{\hat{\alpha}_{k,a,s,t} \hat{\beta}_{k,a,s,t} (\hat{\alpha}_{k,a,s,t} + \hat{\beta}_{k,a,s,t} + \hat{N}_{k,a,s,t})}{(\hat{\alpha}_{k,a,s,t} + \hat{\beta}_{k,a,s,t})^2 (\hat{\alpha}_{k,a,s,t} + \hat{\beta}_{k,a,s,t} + 1) \hat{N}_{k,a,s,t}}$$
. We then asked the question: if this data had been observed from  
 a true binomial distribution, what would the effective sample size,  $N_{\text{bin},k,a,s,t}$ , have been to see as much  
 variation in  $\hat{p}_{k,a,s,t} = \hat{Y}_{k,a,s,t}^{\text{inflated}} / \hat{N}_{k,a,s,t}$  as was seen under the beta-binomial setting? To answer this  
 question and to solve for  $N_{\text{bin},k,a,s,t}$ , we set the variance of an estimator for the probability of success of  
 a binomial distribution,  $\frac{\hat{p}_{k,a,s,t}(1-\hat{p}_{k,a,s,t})}{N_{\text{bin},k,a,s,t}}$ , equal to the beta-binomial variance shown above. Setting  

$$\frac{\hat{\alpha}_{k,a,s,t} \hat{\beta}_{k,a,s,t} (\hat{\alpha}_{k,a,s,t} + \hat{\beta}_{k,a,s,t} + \hat{N}_{k,a,s,t})}{(\hat{\alpha}_{k,a,s,t} + \hat{\beta}_{k,a,s,t})^2 (\hat{\alpha}_{k,a,s,t} + \hat{\beta}_{k,a,s,t} + 1) \hat{N}_{k,a,s,t}} = \frac{\hat{p}_{k,a,s,t}(1-\hat{p}_{k,a,s,t})}{N_{\text{bin},k,a,s,t}}$$
 and rearranging the equations, we arrive at the  
 equation for the effective sample size for each binomial SBH observation (suppressing  $k, a, s, t$  subscripts  
 for simplicity):  $N_{\text{bin}} = N_{\text{eff}} = \frac{\hat{p}(1-\hat{p})(\hat{\alpha}+\hat{\beta})^2(\hat{\alpha}+\hat{\beta}+1)\hat{N}}{\hat{\alpha}\hat{\beta}(\hat{\alpha}+\hat{\beta}+\hat{N})}$ .  
 Via this procedure, 31% of SBH observations had an  $N_{\text{eff}}$  that was larger than  $\hat{N}$ . This was due to  
 practical constraints of having small mortality probabilities and small sample sizes, which can lead to  
 unstable simulation estimates. For these observations, we set  $N_{\text{eff}} = \hat{N}$ . Since this was predominantly a  
 problem of small sample sizes, this only affected 1.7% of the data weighted by sample size. The sum of  
 all  $\hat{N}$  across all SBH data was 210 million, and the sum of all  $N_{\text{eff}}$  was 123 million. Thus, accounting for  
 model variance and out of sample residuals reduced total SBH sample size by 41%.

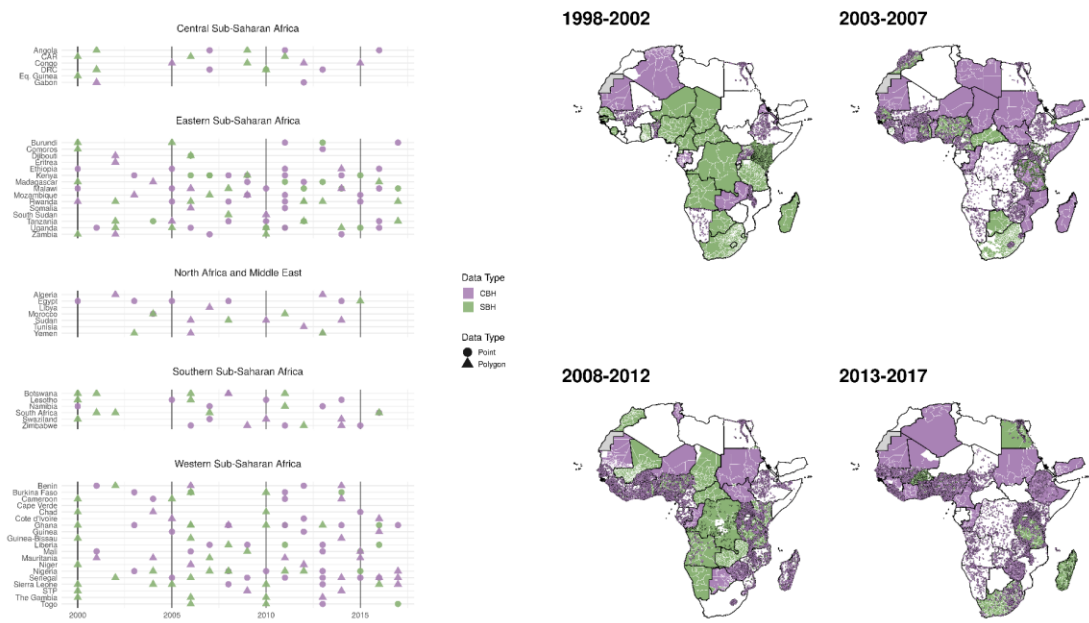

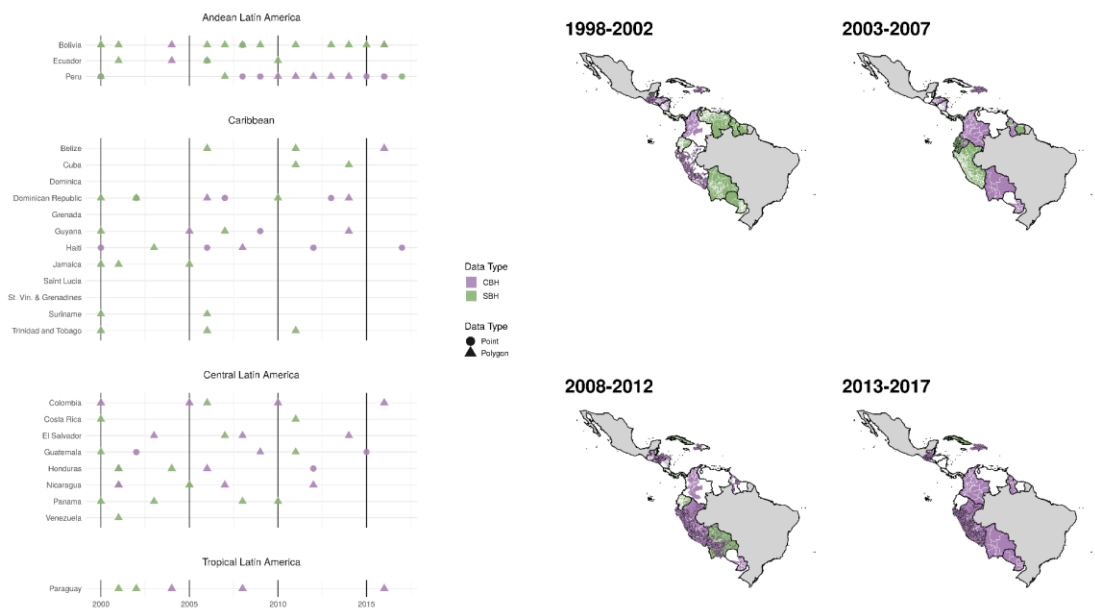

347

348



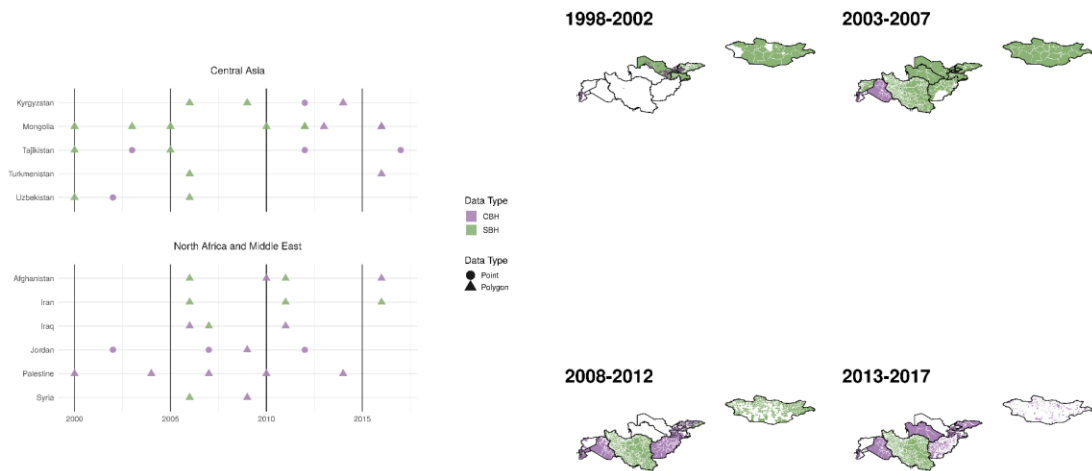

350

351

352 *Supplementary Figure 3.5: Survey data coverage for Southeast Asia and Oceania, 2000–2017*

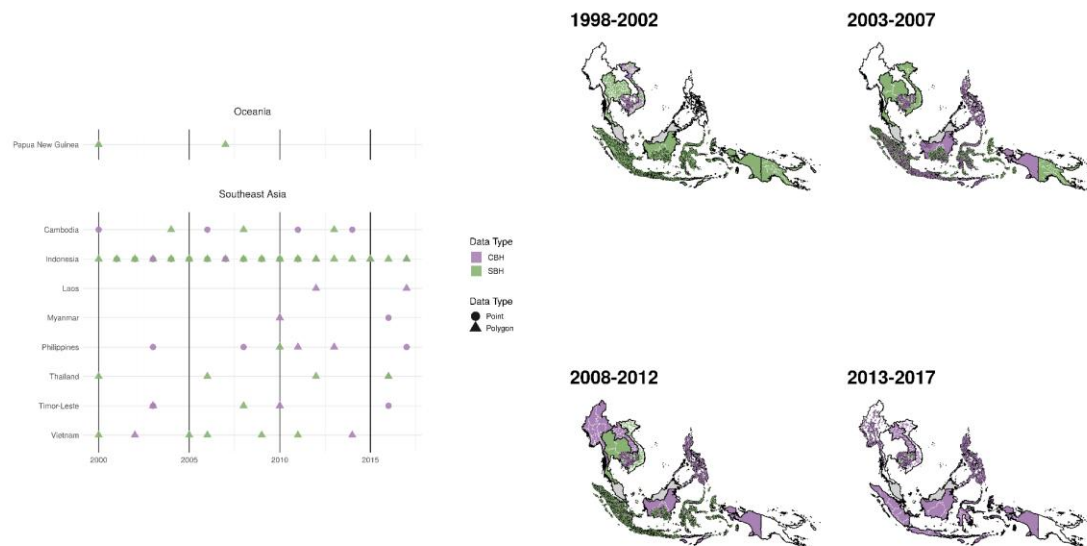

353

354

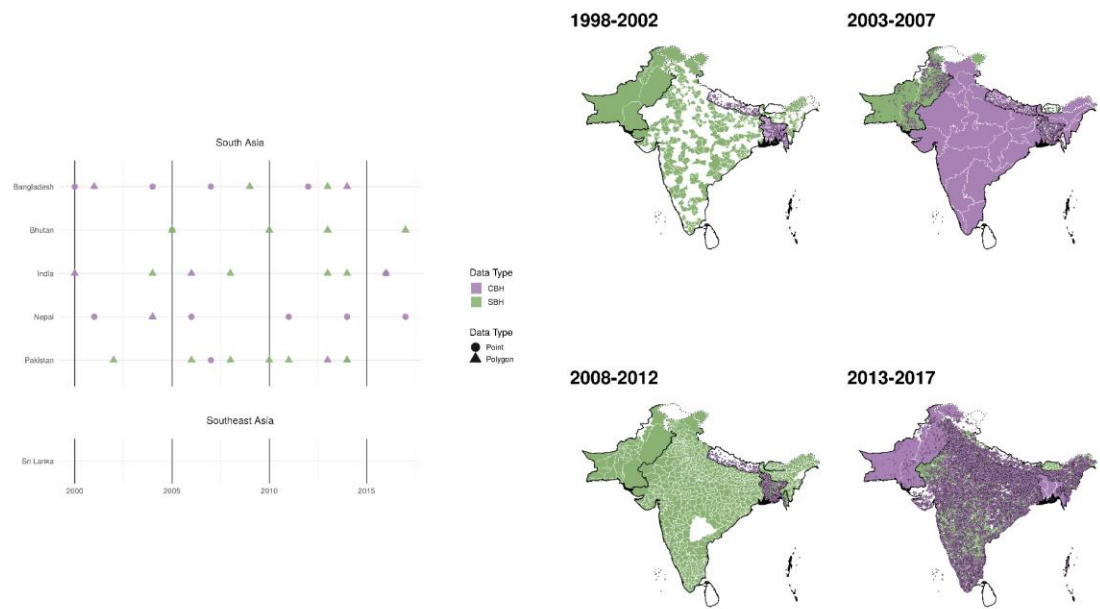

### 3.4 Polygon resampling

We matched all data to GPS coordinates (latitude and longitude) wherever possible. We refer to these precisely located data as ‘point data’. In cases where point data were not available, we matched data points to the smallest possible areal unit (also referred to as polygons). In most cases these polygons represent administrative sub-divisions. Since the geostatistical model we fit (see Supplementary Section 5) requires point data, we re-sampled polygon data into pseudo-point data. This approach has been used before in mapping studies of child mortality<sup>1</sup>, child growth failure<sup>3</sup>, education<sup>4</sup>, and diarrhea burden<sup>2</sup>.

The approach to producing pseudo-points proceeded as follows for each polygon-level observation: we sampled 10,000 locations with weights proportional to the underlying population (as measured by WorldPop, see Supplementary Section 4.4) at 1 x 1-kilometer spatial resolution. We then used k-means clustering to derive a reduced set of points, with k set to 1 per 1000 grid cells. Each of these resulting clusters then served as pseudo-point data. Each pseudo-point was assigned a weight proportional to the number of sampled locations contained in it via k-means clustering. The observed mortality probability for the polygon as a whole was assigned to each point, and the sample size for each point was taken as the sample size for the polygon multiplied by the weight. The sample sizes for all pseudo-points derived from a polygon thus sum to equal the sample size of the polygon as a whole.

## 4 Covariates and auxiliary data

### 4.1 Description of layers and justification

We used geospatial covariates to help improve predictions in places without observed data. Images of each covariate at one time-point are available in Supplementary Figure 4.1. We chose covariates that had known associations with child mortality. These included socio-demographic and environmental measures. We also included covariates representing health outcomes which directly contribute to mortality.

We included the following socio-demographic and environmental covariates: Travel time to nearest inhabited area of 50,000 or more, which serves as a proxy for remoteness from services<sup>12</sup>; intensity of lights at night, which serves as a measure of electricity consumption and economic development<sup>13,14</sup>; mean years of educational attainment by women of reproductive age<sup>15,16</sup>; the mass per cubic meter of air of particles with a diameter less than 2.5 micrometers (PM<sub>2.5</sub>)<sup>17</sup>; ratio of children under 5 to number of women of reproductive age (fertility proxy)<sup>18,19</sup>; the total population; and urbanicity<sup>20</sup>.

We also included the following health-related covariates: proportion of children aged 12-23 months who have received the third dose of diphtheria-pertussis-tetanus vaccine<sup>21</sup>, which also serves as a proxy for routine health service utilization in children<sup>22,23</sup>; incidence rate of *Plasmodium falciparum* malaria in children under 5<sup>24,25</sup>; and prevalence of stunting in children under 5<sup>26-28</sup>.

*Supplementary Figure 4.1: Maps of the covariates used*

1: Travel time to nearest inhabited place with population > 50,000. 2: Light intensity at night. 3: Coverage of DPT3 vaccine in children under 2. 4: Average years of education for women of reproductive age. 5: Fertility ratio. 6: Urban areas. 7: PM<sub>2.5</sub>. 8: Pf Malaria Incidence rate. 9: Stunting prevalence in children under 5. 10: Log of total population. For time-varying covariates, the most recent year of available data is mapped here.

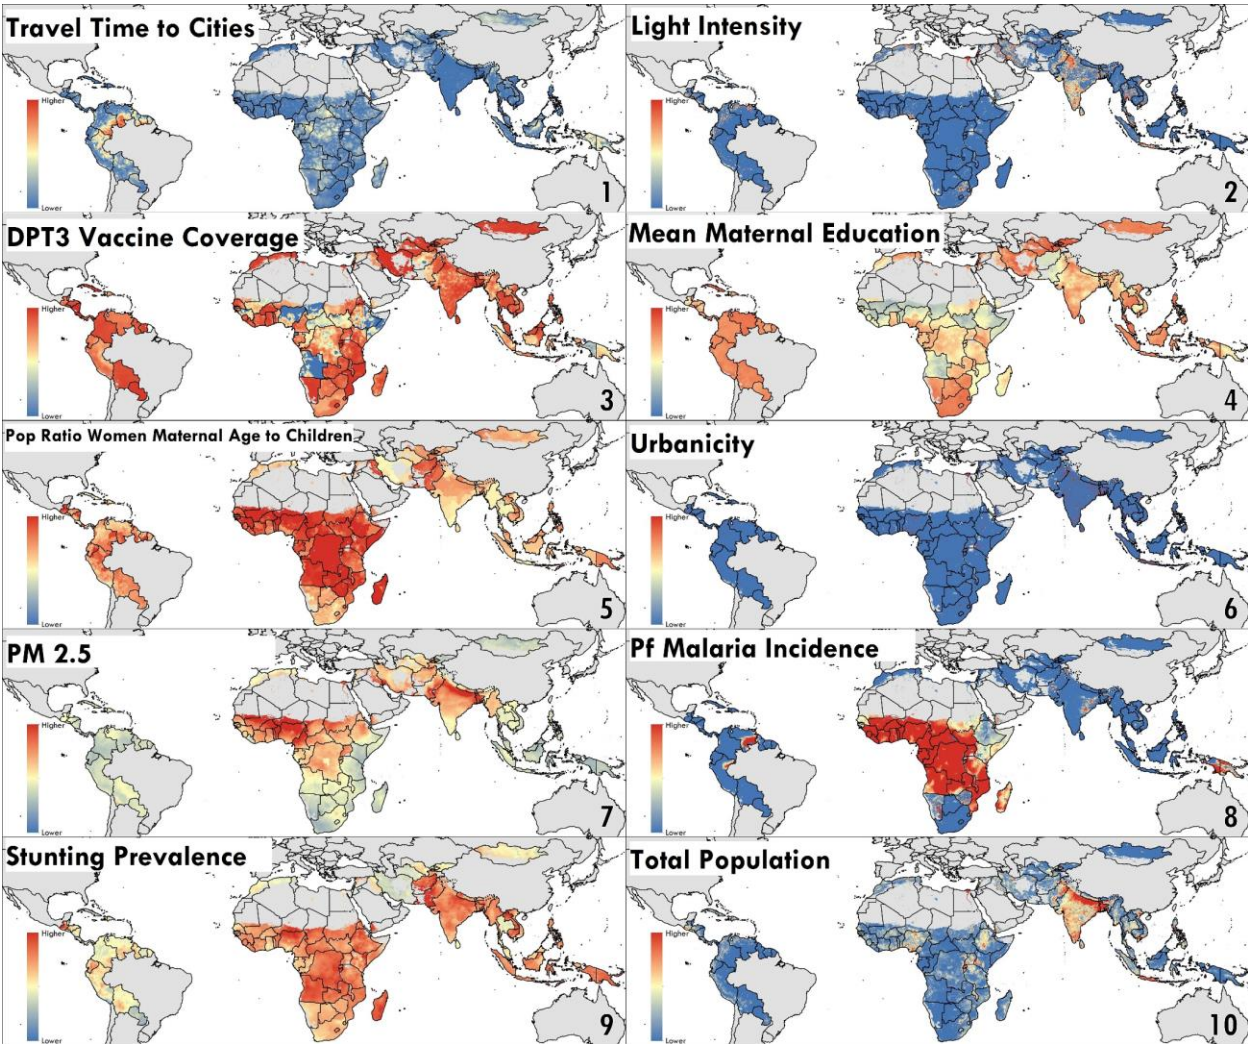

## 4.2 Spatial and temporal standardization

Raw data from spatial covariates came in varying spatial and temporal resolutions. All covariates were prepared to a standardized format and aligned to a 5 x 5-km global annual grid. If raw input resolution was finer than 5 x 5-km we resampled the raster by taking either a neighborhood average or sum (in the case of count covariates, such as population).

If covariates were reported in time intervals coarser than year we interpolated between years. Several covariates were not available out to 2017, and for these we completed the time series by carrying forward data available for the most recent year. Travel time to cities was synoptic and thus did not vary over time. For this covariate no temporal adjustments were made and it was used as non-temporally changing in the model.

Some covariates did not have full global coverage. For each of the 11 model regions used in this analysis, we first checked if each covariate had full geographic coverage in the region. If the covariate did not cover the region, it was not used.

### Supplementary Table 4.1: Geospatial covariate citations

Citations for externally sourced covariates. Covariates prevalence of diarrhea, coverage of DPT3 vaccine in children under 5, average years of education for women of reproductive age, and prevalence of stunting in children under 5 are all modeled by the Institute for Health Metrics and Evaluation.

| Covariate                                   | Source                                | Paper Citation                                                                                                                                               | Dataset Citation                                                                                                                                          | Processing                                                                          |
|---------------------------------------------|---------------------------------------|--------------------------------------------------------------------------------------------------------------------------------------------------------------|-----------------------------------------------------------------------------------------------------------------------------------------------------------|-------------------------------------------------------------------------------------|
| access2 (Travel time to nearest settlement) | Oxford                                | Weiss, D. J. <i>et al.</i> A global map of travel time to cities to assess inequalities in accessibility in 2015. <i>Nature</i> <b>533</b> , 333-336 (2018). | Available at: <a href="https://map.ox.ac.uk/research-project/accessibility_to_cities/">https://map.ox.ac.uk/research-project/accessibility_to_cities/</a> | Raster resampled using bilinear interpolation to standard 5 km spatial resolution.  |
| dmspntl (Nighttime lights)                  | NOAA DMSP satellite program (derived) |                                                                                                                                                              | Available at: <a href="https://www.ngdc.noaa.gov/eog/dmsp/downloadV4composites.html">https://www.ngdc.noaa.gov/eog/dmsp/downloadV4composites.html</a>     | Rasters resampled using bilinear interpolation to standard 5 km spatial resolution. |

|                                                          |                                    |                                                                                                                                                                                                                |                                                                                                                                                                         |                                                                                                                                                                                                                                                                                                                                                                                                                                                                                                                                                        |
|----------------------------------------------------------|------------------------------------|----------------------------------------------------------------------------------------------------------------------------------------------------------------------------------------------------------------|-------------------------------------------------------------------------------------------------------------------------------------------------------------------------|--------------------------------------------------------------------------------------------------------------------------------------------------------------------------------------------------------------------------------------------------------------------------------------------------------------------------------------------------------------------------------------------------------------------------------------------------------------------------------------------------------------------------------------------------------|
| fertility                                                | WorldPop<br>(derived)              | Lloyd, C. T., Sorichetta, A. & Tatem, A. J. High resolution global gridded data for use in population studies. <i>Sci. Data</i> <b>4</b> , sdata20171 (2017).                                                  | Available at:<br><a href="http://www.worldpop.org.uk/data/get_data/">http://www.worldpop.org.uk/data/get_data/</a> .<br>(Accessed: 25th July 2017)                      | fertility = (M04 + F04) / WOCBA<br>where:<br>M04 = males, 0-4 years old<br>F04 = females, 0-4 years old<br>WOCBA = women of child bearing age (females 15-49 years old) - from WorldPop<br>5-year rasters were interpolated using an exponential growth rate to produce annual rasters. 1 km raw data were aggregated to 5 km spatial resolution, preserving total population sums. Once converted to fertility, those areas with a population of zero were filled with the nearest neighboring fertility value where the original population was > 0. |
| ghslurbanicity<br>(Urbanicity)                           | European<br>Commission/ GHS        | Pesaresi, M. et al. Operating procedure for the production of the Global Human Settlement Layer from Landsat data of the epochs 1975, 1990, 2000, and 2014. (Publications Office of the European Union, 2016). | Available at:<br><a href="http://ghsl.jrc.ec.europa.eu/data.php">http://ghsl.jrc.ec.europa.eu/data.php</a>                                                              | Rasters resampled using bilinear interpolation to standard 5 km spatial resolution. For intervening data years, the closest available data year was used.                                                                                                                                                                                                                                                                                                                                                                                              |
| ihmepm25 (ambient air pollution, particulate matter 2.5) | IHME<br>GBD                        |                                                                                                                                                                                                                | Data integration model available at:<br><a href="https://arxiv.org/abs/1609.00141">https://arxiv.org/abs/1609.00141</a>                                                 | Rasters resampled using bilinear interpolation to standard 5 km spatial resolution.                                                                                                                                                                                                                                                                                                                                                                                                                                                                    |
| map_pf_incidence<br>(Malaria incidence)                  | The<br>Malaria<br>Atlas<br>Project | Gething, P. W. et al. Mapping Plasmodium falciparum Mortality in Africa between 1990 and 2015. <i>N. Engl. J. Med.</i> <b>375</b> , 2435–2445 (2016).                                                          | Available at:<br><a href="http://www.map.ox.ac.uk/">http://www.map.ox.ac.uk/</a>                                                                                        | Rasters resampled using bilinear interpolation to standard 5 km spatial resolution.                                                                                                                                                                                                                                                                                                                                                                                                                                                                    |
| worldpop (Population)                                    | WorldPop                           | Lloyd, C. T., Sorichetta, A. & Tatem, A. J. High resolution global gridded data for use in population studies. <i>Sci. Data</i> <b>4</b> , sdata20171 (2017).                                                  | World Pop. Get data. Available at:<br><a href="http://www.worldpop.org.uk/data/get_data/">http://www.worldpop.org.uk/data/get_data/</a> .<br>(Accessed: 25th July 2017) | 5-year rasters were interpolated using an exponential growth rate to produce annual rasters. 1 km raw data were aggregated to 5 km spatial resolution, preserving total population sums.                                                                                                                                                                                                                                                                                                                                                               |

422

423



## 4.3 Administrative boundaries

All country-level and first and second administrative-level boundaries used in this analysis came from the Database of Global Administrative Areas (GADM) version 3.6. GADM shapefiles are available to download from <https://gadm.org/>.

First administrative-level boundaries were further edited to match boundaries used for subnational estimation in the Global Burden of Disease (GBD) in cases where GADM did not match the GBD geographies. This affected India and Indonesia. Six separate first administrative units were merged into one unit called “The Six Minor Territories” in India. In Indonesia, Kalimantan Timur was split into two provinces: Kalimantan Timur (South) and Kalimantan Utara (North).

Finally, in India, district (second administrative subdivision) boundaries were edited to include the latest district divisions up to December 2018 using a shapefile from ML\_INFOMAP ([www.mlinfomap.com](http://www.mlinfomap.com)).

## 4.4 Gridded population data

We used WorldPop (<http://www.worldpop.org.uk/>) as a source for all gridded population data used throughout this analysis, including as a covariate in modelling and for taking population weighted averages at areal units. Except for use as a model covariate and for polygon resampling, where we used gridded total population, we used gridded population for the under-5 age band (see for example our discussion of post estimation in Supplementary Section 5.2). WorldPop provides gridded population estimates at the 1 x 1-km spatial resolution and at five-year intervals, so we resampled the raster by taking a zonal sum to reach the 5 x 5-km resolution we used for analysis and results. We interpolated between years using an exponential growth rate.

# 5 Statistical model

## 5.1 Geostatistical model

For each modeling region, we assume a discrete hazards model, with a baseline hazard function varying across the seven age bins, as described in Supplementary Section 3.3. Age bins are (in months): NN: [0-1), PNN1: [1-6), PNN2: [6-12), 1yr: [12-24), 2yr: [24-36), 3yr: [36-48), 4yr: [48-60).

Each child recorded in CBH data is counted as entering a period-age bin (an age band within a calendar year), and a death event for a given child is assigned if they died within a period-age bin. We counted the number of children entering into,  $N$ , and dying within,  $Y$ , for each period-age bin from each point location in each survey  $k$  within each country  $c$  in the data. Likewise, these same variables are estimated indirectly for each point in SBH data as described in Supplementary Section 3.3.

The number of deaths for children in age band  $a$  in year  $t$  at point location  $s$  was assumed to follow a binomial distribution:

$$Y_{a,s,t} \sim \text{Binomial}(N_{a,s,t}, p_{a,s,t})$$

Where  $p_{a,s,t}$  can be interpreted as the probability of death in the age bin, conditional on survival to that age bin for a particular space-time location. Using a generalized linear regression modelling framework, a logit link function is used to relate  $p$  to a linear combination of effects:

$$\text{Logit}(p_{a,s,t}) = \beta^0 + \sum_{a=2}^7 I_a \beta_a^1 + \beta^2 X_{s,t} + \beta^3 t + v_{c[s]} + v_{k[s]} + Z_{a,s,t}$$

The first term  $\beta^0$  is an intercept, representing the mean for the first age band when all covariates equal zero, while  $I_a \beta_a^1$  are fixed effects for each age band, representing the mean overall hazard deviation for each age band from the intercept.  $\beta^2 X_{s,t}$  are the effects of geospatial covariates, which we described in detail in Supplementary Section 4. All geospatial covariates were centered and scaled by subtracting their mean and dividing by their standard deviations.  $\beta^3 t$  is an overall linear temporal effect to account for broad secular trends. Each  $v$  term represent uncorrelated random effects:  $v_{c[s]} \sim \text{Normal}(0, \sigma_c^2)$  is a country-level random effect applied to all locations,  $s$ , within a country;  $v_{k[s]} \sim \text{Normal}(0, \sigma_k^2)$  is a data source-level random effect for the survey  $k$  from which the data at location  $s$  was observed. Survey-level random effects were used to account for systematic variation or biases across sources and were included in model fitting but not in prediction from fitted models.

The term  $Z_{a,s,t} \sim \text{Gaussian Process}(0, \mathbf{K})$  is a correlated random effect across age, space, and time and is modeled as a four-dimensional mean zero Gaussian process with covariance matrix  $\mathbf{K}$ . This term accounts for structured residual correlation across these spatial-age-temporal dimensions that are not accounted for by any of the other model's fixed or random effects. This structure was chosen because the hazard for each age group is expected to vary in space and time, and such spatiotemporal correlation are likely to be similar across ages.  $\mathbf{K}$  is constructed as a separable process across age, space, and time:  $\mathbf{K} = \Sigma_a \otimes \Sigma_t \otimes \Sigma_s$ . The continuous spatial component is modeled with a stationary isotropic Matérn covariance function:  $\text{cov}_s(d_s) = \frac{2^{1-\nu}}{\tau \Gamma(\nu)} \left( \sqrt{2\nu} \frac{d_s}{\kappa} \right)^\nu K_\nu \left( \sqrt{2\nu} \frac{d_s}{\kappa} \right)$ , where  $K_\nu$  is the modified Bessel function of the second kind. The Matérn function has three hyperparameters:  $\kappa$ ,  $\tau$ , and  $\nu$ ; the parameter  $\nu$  is fixed at 1 and  $\kappa$  and  $\tau$  are fitted in the model. The overall amplitude of the process is determined by the marginal variance,  $1/\tau > 0$  while the distance required between two spatial locations,  $d_s = |s_i - s_j| > 0$ , before their correlation drops below any specific threshold is governed by the scaling parameter,  $\kappa > 0$ . The age and temporal effects were each assumed to be discrete auto-regressive order 1 (AR1) processes where the discrete steps are taken annually in time and across the seven age groups. The AR1 covariance functions are each defined by single correlation parameters:  $\rho_a$  and  $\rho_t$  for age and time, respectively.

We specified the following priors for model parameters:

$$\log(\kappa) \sim \text{Normal}(0,1)$$

$$\log(\tau) \sim \text{Normal}(0,1)$$

$$\log\left(\frac{1 + \rho_a}{1 - \rho_a}\right) \sim \text{Normal}(1,1)$$

$$\log\left(\frac{1 + \rho_t}{1 - \rho_t}\right) \sim \text{Normal}(1,1)$$

$$\beta^{0,1,2,3} \sim \text{Normal}(0,9)$$

$$\log(\sigma_c) \sim \text{Normal}(-4, 4)$$

$$\log(\sigma_k) \sim \text{Normal}(-4, 4)$$

We used transformations on priors in order to perform optimization on a likelihood and maintain constrained parameters. Log-transforms were used to constrain certain parameters ( $\kappa, \tau, \sigma_c, \sigma_k$ ) positive. Transformations on the  $\rho$  parameters constrained values between -1 and 1 and centered at zero. Priors on all fixed effects were weakly informative, since covariates were centered and scaled. Priors for the standard deviation of Gaussian random effects ( $\sigma_c, \sigma_k$ ) were structured such that they had a small mean and a long tail because we thought these effects would be minimal considering other model components, but did not want to completely constrain their size. The models were fit using Template Model Builder<sup>6</sup> (TMB) package in R version 3.4. We used maximum a posteriori (MAP) inference, using a maximum likelihood estimation with an augmented optimization objective (log-likelihood function) which incorporated prior distributions for all model parameters. TMB uses automatic differentiation to find the Laplace approximation to the marginal log-likelihood with respect to the hyperparameters of any random effects specified in the model. A non-linear optimization routine is then used to maximize the marginal log-likelihood to derive point estimates for all model parameters. The  $Z_{a,s,t}$  random effects were fitted using the stochastic partial differential equations<sup>29</sup> approximation to Gaussian Process residuals. We constructed a finite elements mesh for the SPDE approximation based on a polygon boundary defining the spatial limits of the modeling region. The mesh had a minimum edge length of 100 kilometers over land. Finally, a generalized delta-method is used to approximate the joint precision matrix of all model parameters.

Using the joint precision matrix and point estimates, we generated 1000 draws from all model parameters using a multivariate-normal approximation. These model parameter draws were used to predict corresponding draws of mortality probabilities across all age groups for each grid cell in each year. In other words, for each age bin in each year we estimated 1000 surfaces of mortality probability estimates, each surface corresponding to one draw from the posterior parameter estimates. Within each surface, or “candidate map”, the correlation structure across space-age-time is maintained (for a detailed discussion, see Patil and colleagues<sup>30</sup>).

Separate models were fitted for each of 11 global regions (see map in Supplementary Figure 3.1 and country list in Supplementary Figure 3.1). Splitting up modeling in this way was done for two reasons. First, it was not computationally feasible to fit a single global model. Second, fitting by regions allows for variation in fitted parameters across epidemiologically distinct regions.

### 5.1.1 Model results

Coefficient values for each model region are shown in Supplementary Figure 5.1. These are exponentiated coefficients from a model with a logit link and as such should be interpreted as odds ratios. Geospatial covariates enter the model as centered and scaled by the mean and standard deviations, as such coefficients can be interpreted as the odds ratio for a one standard deviation

increase in covariate value. The horizontal black line on the figure indicates an odds ratio of 1, or no effect on mortality. Any effect size below the line can be interpreted as protective, and effects above the line are associated with increased mortality. We emphasize that, due to high correlation and issues of circularity in production of covariate surfaces, drawing inference on effect sizes or directions is not recommended.

Posterior values for all model hyper-parameters are shown in Supplementary Figure 5.2. Variation in country random effects was substantial in most regions, indicating that there were significant country-level intercept shifts that were not accounted for by spatial covariates alone. Variation in country random effects was consistently larger than variation in the data source-specific random effects, except for the North Africa region. Data-source-specific random effects account for systematic bias across sources and were not included in predictions. We also show posterior estimates for the four parameters guiding the Gaussian Process random effect. The  $\rho$  parameter for age was always above 0.75 and the  $\rho$  parameter for year was always above 0.98, indicating high correlation across age bins, and very high correlation across annual time steps. This was expected given the way that data were prepped, where a single data source contributes a time trend of information for all the different age bins.

551 *Supplementary Figure 5.1: Fitted estimates of covariate coefficients across the 12 model regions*

552 All fixed effect parameter estimates are exponentiated. Geospatial covariates enter the model as centered and scaled by their standard  
553 deviations. Additional fixed effects not included in this plot are the overall intercept and age-bin-specific intercepts.

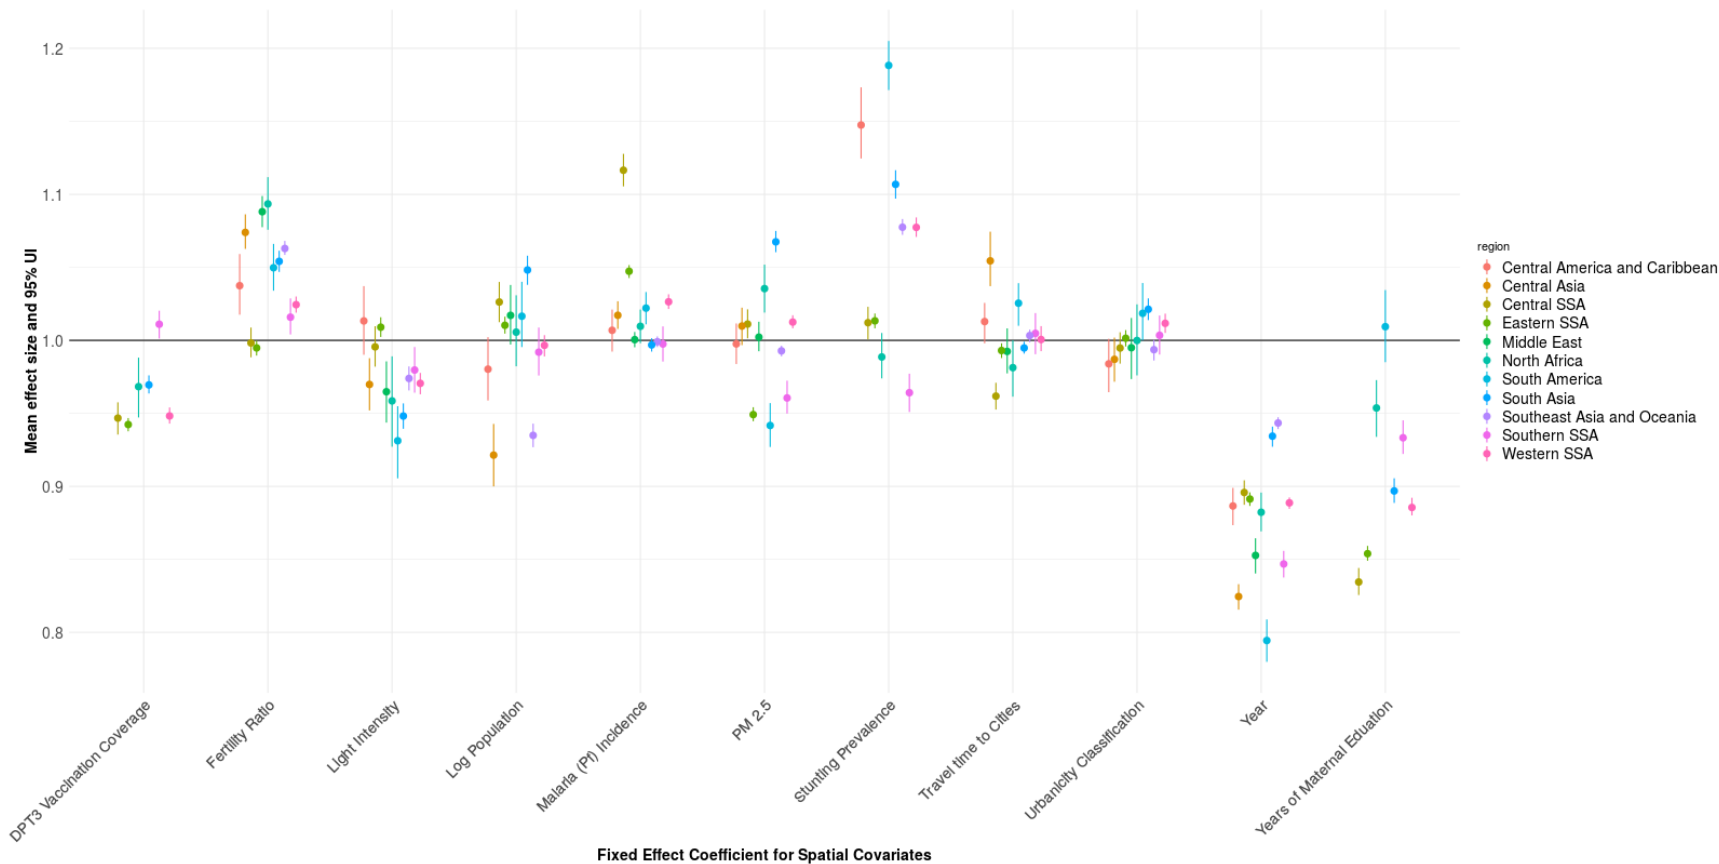

554

555

Supplementary Figure 5.2: Posterior hyper-parameter fits across the 12 model regions

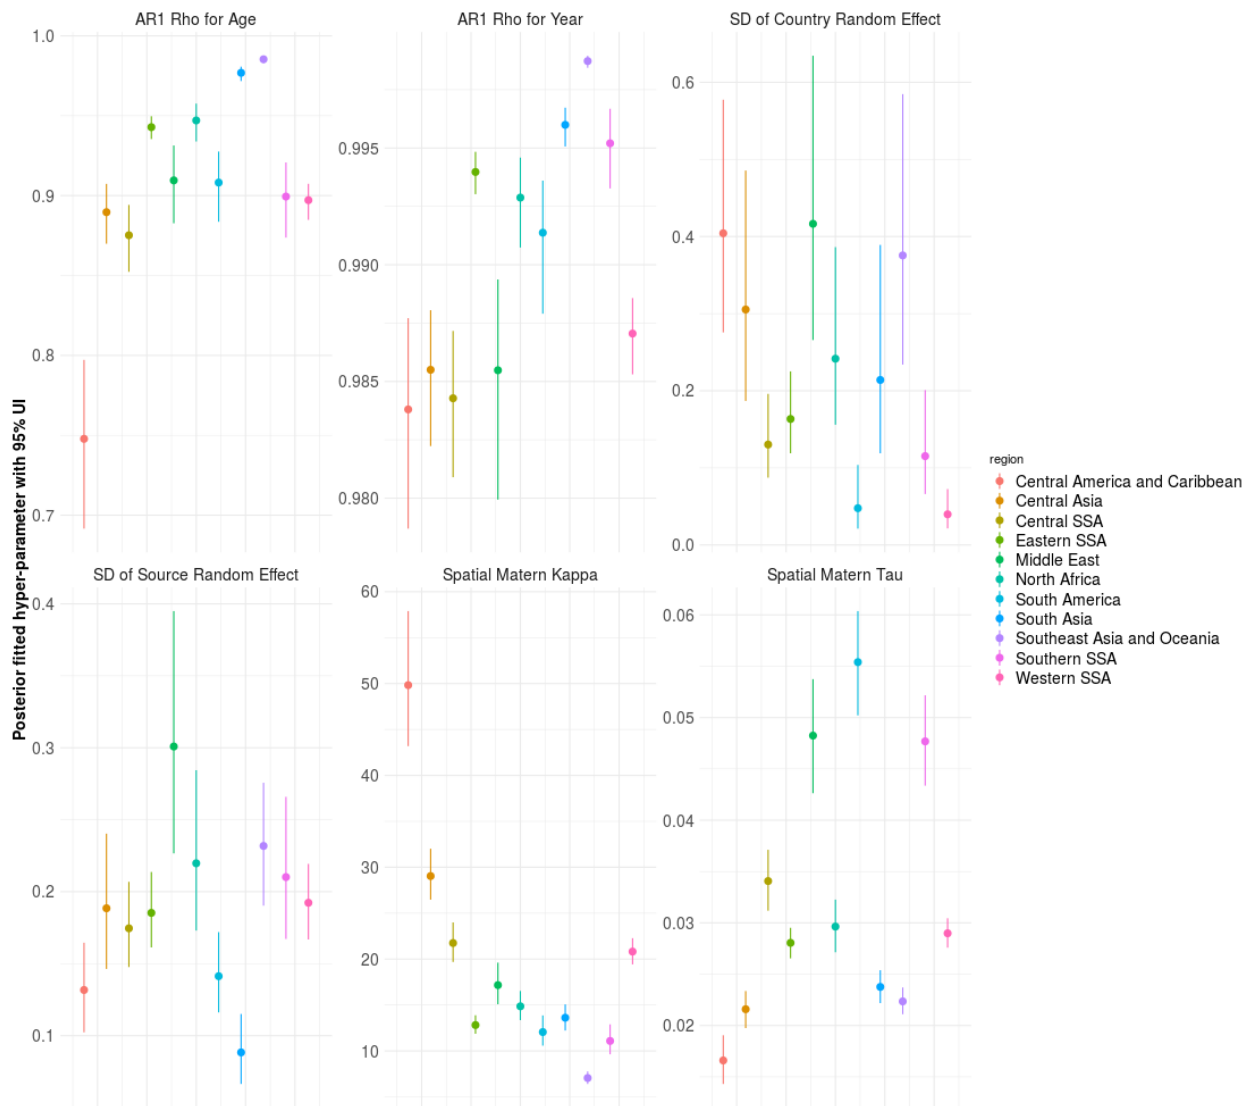

## 5.2 Post-estimation

### 5.2.1 Combining age groups

For reporting in this paper, we focus on presenting results for three age bands of mortality: neonatal, infant, and under-5. Neonatal is taken as the first age band predicted from the model, and infant and under-5 are derived from a combination of age bands using the synthetic cohort approach to estimating period-specific mortality probabilities. All aggregation across ages was done at the draw level for each

space-time grid cell. For each space-time grid cell ( $gc$ ) and posterior predictive draw ( $m$ ) of estimated mortality probability  $\hat{p}^{m,gc}$ , infant mortality ( $1\hat{q}0^{m,gc}$ ) is calculated as  $1 - \prod_{a=1}^3(1 - \hat{p}_a^{m,gc})$ , and under-5 mortality ( $5\hat{q}0^{m,gc}$ ) is calculated as  $1 - \prod_{a=1}^7(1 - \hat{p}_a^{m,gc})$ . Since these calculations are done at the grid-cell-draw level, correlation structure within each draw is maintained by this processing.

### 5.2.2 Calculating numbers of deaths

In order to produce estimates of death counts, we first converted each grid-cell-draw estimate of mortality probability,  $q$ , predicted directly from the model (and aggregated into the three age bins we report) into estimates of yearly mortality rates,  $m$ . For infants and under-5s we used the following formula<sup>11</sup>:  $m = 1/(-n + a + n/q)$ , where  $n$  is the width of the age band (1 and 5 for infant and under-5, respectively), and  $a$  is the average number of years lived by those who died within the age band. For  $a$  we used the country-year-specific estimate produced as part of the GBD study<sup>7</sup>. We calculated  $m$  in the neonatal band as  $-12 * \log(1 - q)$ .<sup>11</sup> For provisional estimates of deaths, we multiplied  $m$  at each age-space-time-draw by high-resolution population estimates for under-5s available from the WorldPop project. WorldPop does not publish estimates of neonatal or infant population, so we assumed within-country relative spatial distributions of populations in those age bins equivalent to those seen across the broader under-5 populations. Furthermore, WorldPop does not publish uncertainty around their grid-cell-level population estimates, so we were unable to propagate population count uncertainty into our estimates of death counts. Finally, we scaled grid-cell-level death counts by national death count estimates available from the GBD (see Supplementary Section 5.2.5 for more details on calibration to GBD).

### 5.2.3 Masking grid-cell-level estimates

Although the model can predict at all locations covered by available raster covariates, all final model outputs for which land cover was classified as “barren or sparsely vegetated” or “snow and ice” on the basis of MODIS satellite data (2013) and where the total population density was less than 10 individuals per  $1 \times 1$  km grid cell in 2015 were masked from improved understanding when communicating with data specialists and policymakers.

### 5.2.4 Summarizing results and aggregating to administrative subdivisions

Summary maps for probabilities of death and death counts were produced by taking summary statistics across draws at either the grid cell or aggregated levels. For example, mean grid-cell-level maps (such as Figure 1c) were derived by taking the mean across all draws in each age-time grid cell, while uncertainty intervals were derived from the 2.5th and 97.5th percentiles at each age-time grid cell.



Spatially aggregated estimates, such as those at the country and first- and second-administrative areal unit were made by taking population weighted averages (using WorldPop gridded population data) of the value of interest for each draw across each areal unit, such that we produced draw-level estimates for each areal unit. Grid cells were assigned to an area based on the location of their respective centroids. These were subsequently summarized across draws. In places where borders intersected grid cells, death counts in each grid cell were split based on the share of land area in each adjacent area.

#### 5.2.5 Calibration with Global Burden of Disease 2017

We performed a calibration of our estimates to national and subnational estimates from the GBD 2017 study<sup>7</sup>. This allowed us to take advantage of the national-level information such as vital registration data which is used as part of the GBD estimation process but which we were unable to currently use in our geostatistical model. To do so, we first assigned each grid cell to a country based on the location of the grid cell centroid. We then generated mean estimates for each country-age-year based on the aggregation approach described above in Supplementary Section 5.2.4. For each country-age-year estimate, we generated a scaling factor defined as the ratio between the GBD estimate and the aggregated mean national estimate from our model. These scaling factors were applied to each grid-cell draw, ensuring that aggregated mean estimates from our model were identical to the mean estimate from the GBD 2017 study.

The relationship between our aggregated national-level predictions (i.e., pre-calibration predictions) and those from the GBD 2017 are compared in Supplementary Figures 5.3-5.5. Overall, the median scaling factor was 0.99 for neonates, 1.02 for infants, and 1.03 for under-5s, and the inter-quartile ranges were 0.87–1.09, 0.91–1.11, and 0.92–1.12 for the neonates, infants, and under-5s, respectively, indicating close agreement with between the aggregated geospatial estimates and national-level estimates produced for the GBD 2017 study. Disagreement was evident in countries such as Costa Rica and Thailand, where GBD estimates are largely informed by vital registration data which disagree with concurrent survey data sources utilized in our model. We also saw disagreement in countries such as Haiti in 2010, where the mortality shock from earthquake was incorporated into the GBD estimate via the fatal discontinuity analysis<sup>7</sup>.

For India and Indonesia, GBD produced subnational estimates of neonatal, infant, and child mortality at the first administrative level. For these countries, we calibrated our estimates to these subnational estimates. Overall, the median scaling factor across subnational units in these countries were: for neonates 1.00, for infants 1.06, and for under-5s 1.03, and the inter-quartile ranges were 0.91–1.13, 0.95–1.16, and 0.93–1.13 for the neonates, infants, and under-5s, respectively. The relationship between our aggregated predictions (i.e. pre-calibration predictions) and those from the subnational areas in these countries from GBD 2017 are compared in Supplementary Figures 5.6-5.8.

Supplementary Figure 5.3: Pre- and post-calibration comparisons, national level GBD, under-5

Comparison of under-5 mortality probability estimates for 2000, 2005, 2010, and 2017 in GBD-reported national geographies derived by population weighting 5 x 5-km grid cell estimates before (x-axis) and after (y-axis) calibration to GBD 2017 by year.

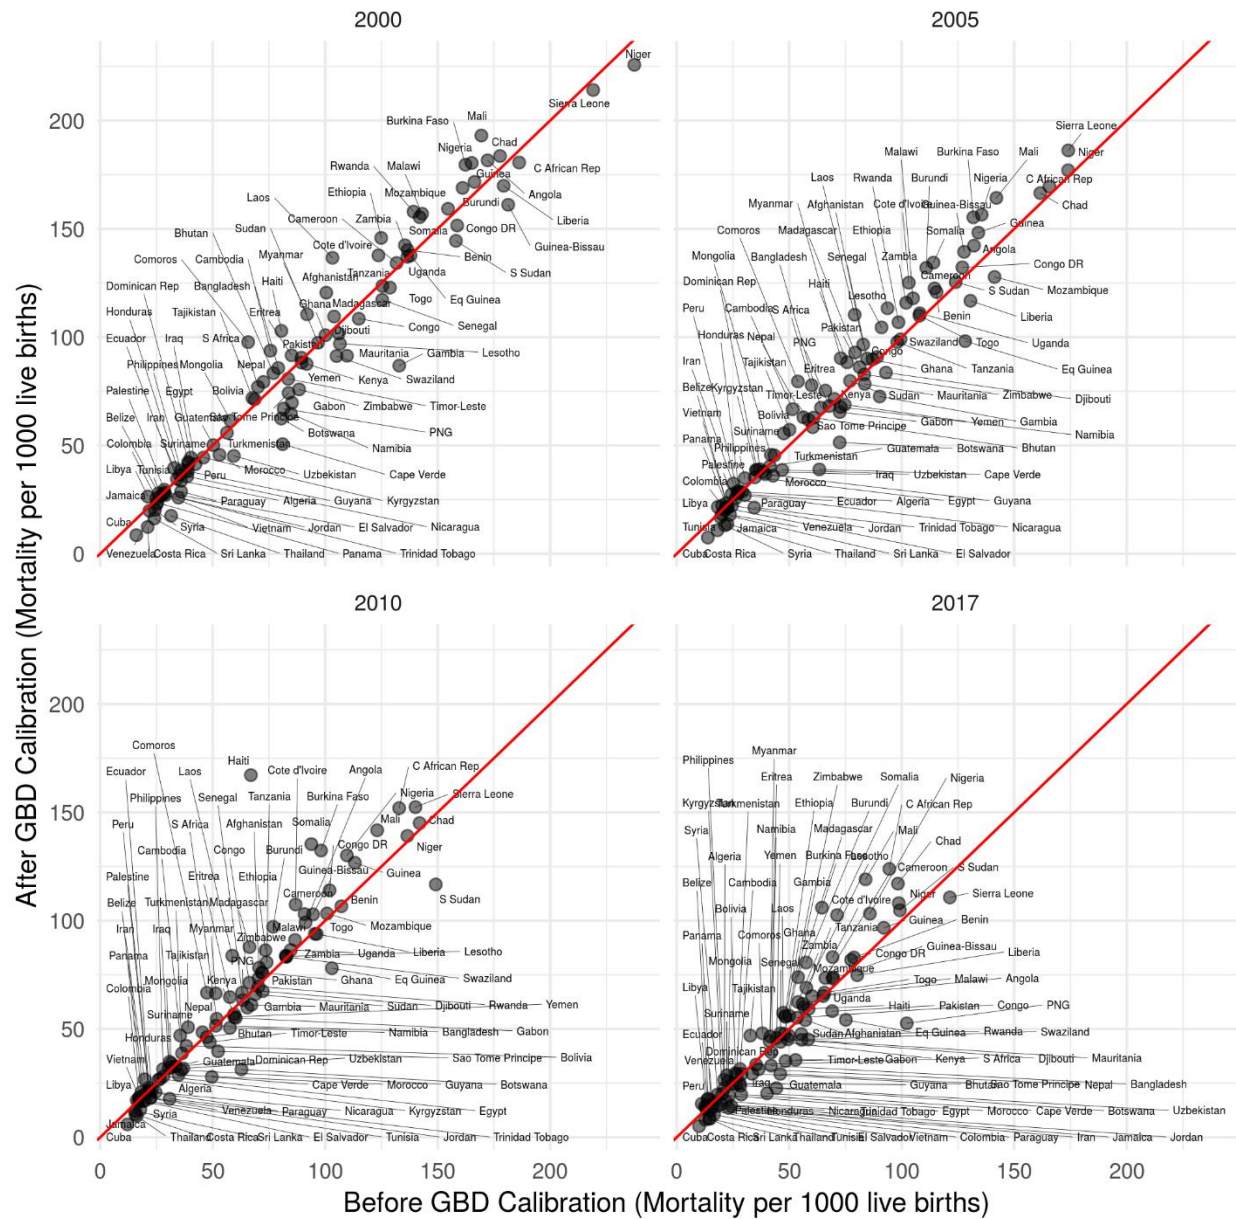

648

649 *Supplementary Figure 5.4: Pre- and post-calibration comparisons, national-level GBD, infant*

650

651

652

Comparison of infant mortality probability estimates for 2000, 2005, 2010, and 2017 in GBD-reported national geographies derived by population weighting 5 x 5-km grid cell estimates before (x-axis) and after (y-axis) calibration to GBD 2017 by year.

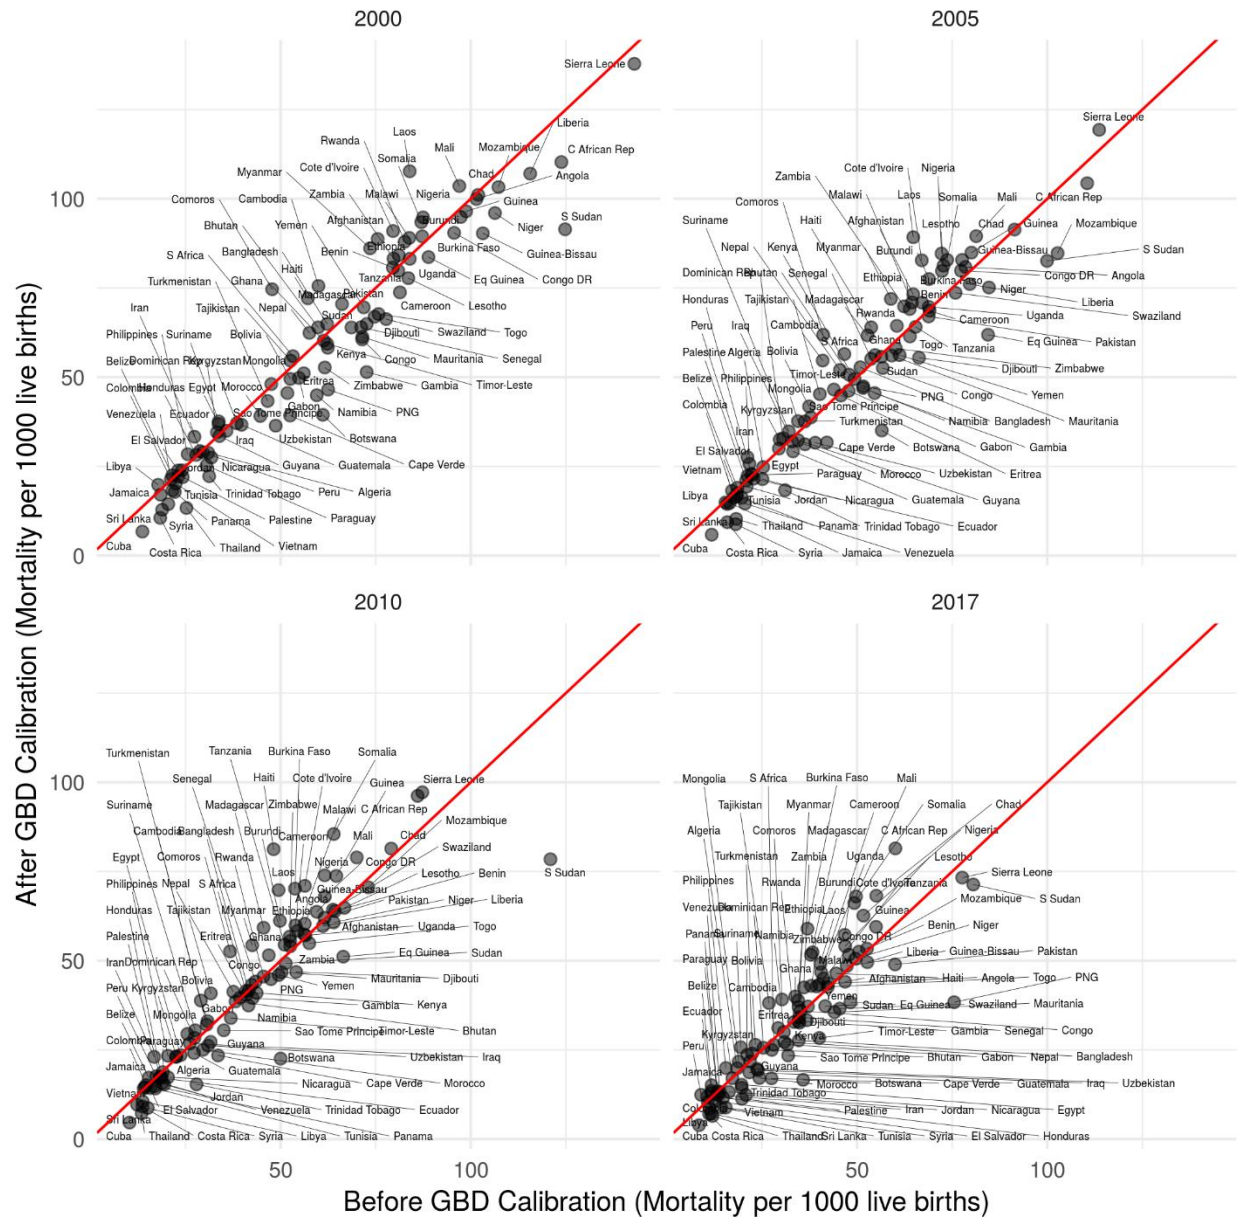

653

654

655

# 656 *Supplementary Figure 5.5: Pre- and post-calibration comparisons, national level GBD, neonatal*

657 Comparison of neonatal mortality probability estimates for 2000, 2005, 2010, and 2017 in GBD reported  
 658 national geographies derived by population weighting 5 x 5-km grid cell estimates before (x-axis) and  
 659 after (y-axis) calibration to GBD 2017 by year.

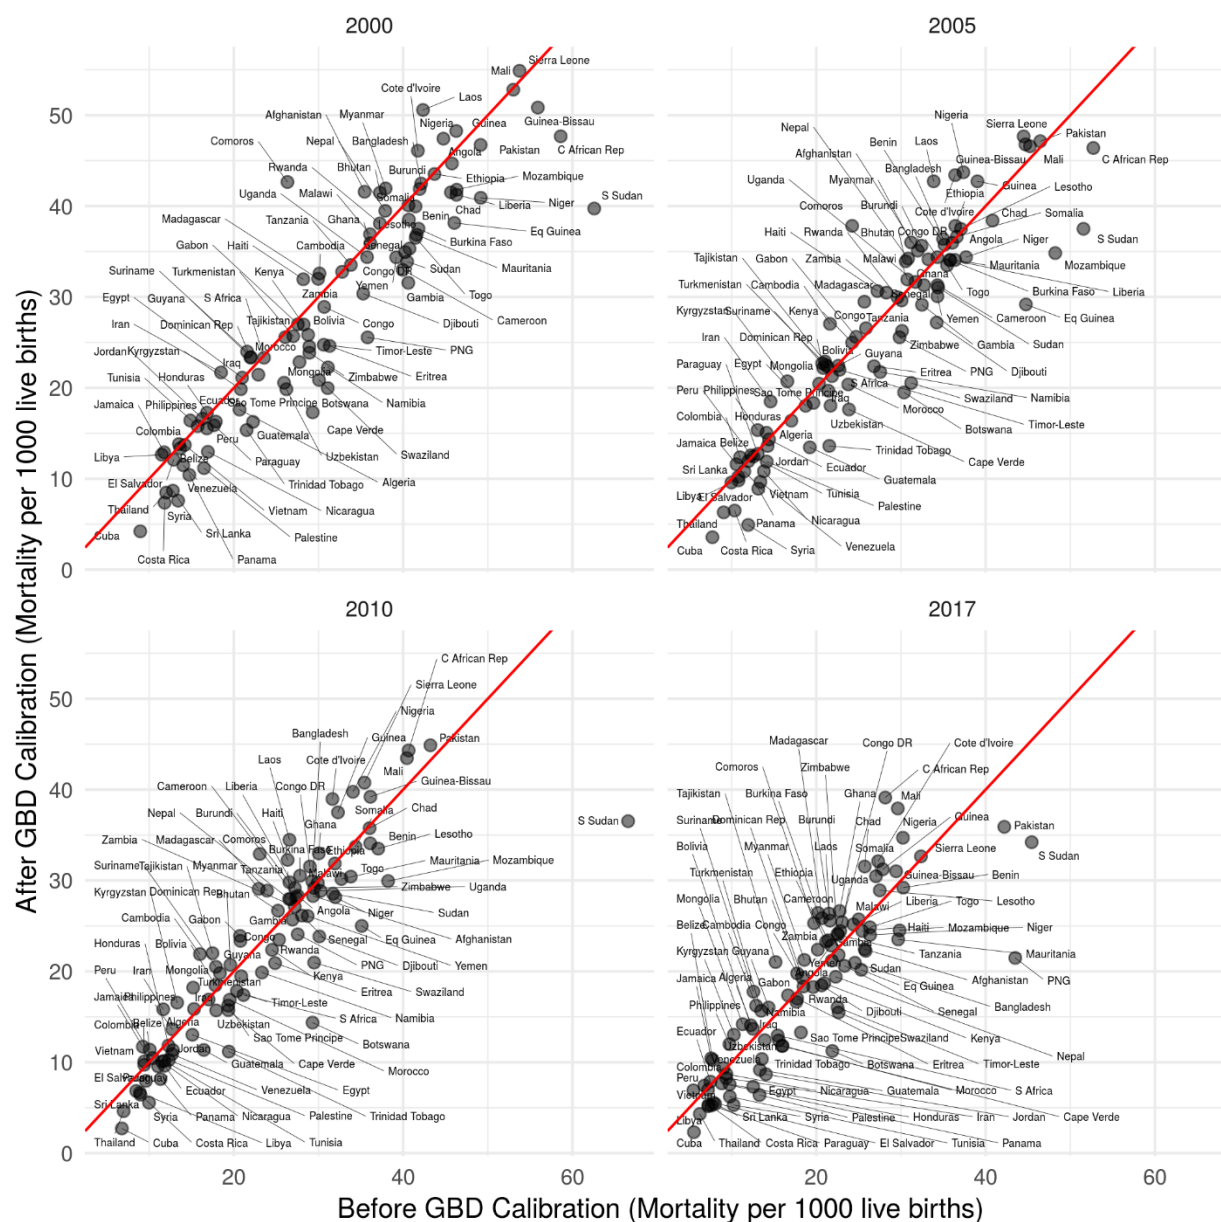

660

661

662

663 *Supplementary Figure 5.6: Pre- and post-calibration comparisons, subnational level GBD, under-5*

664 Comparison of under-5 mortality probability estimates for 2000, 2005, 2010, and 2017 in GBD reported  
665 subnational geographies derived by population weighting 5 x 5-km grid cell estimates before (x-axis) and  
666 after (y-axis) calibration to GBD 2017 by year.

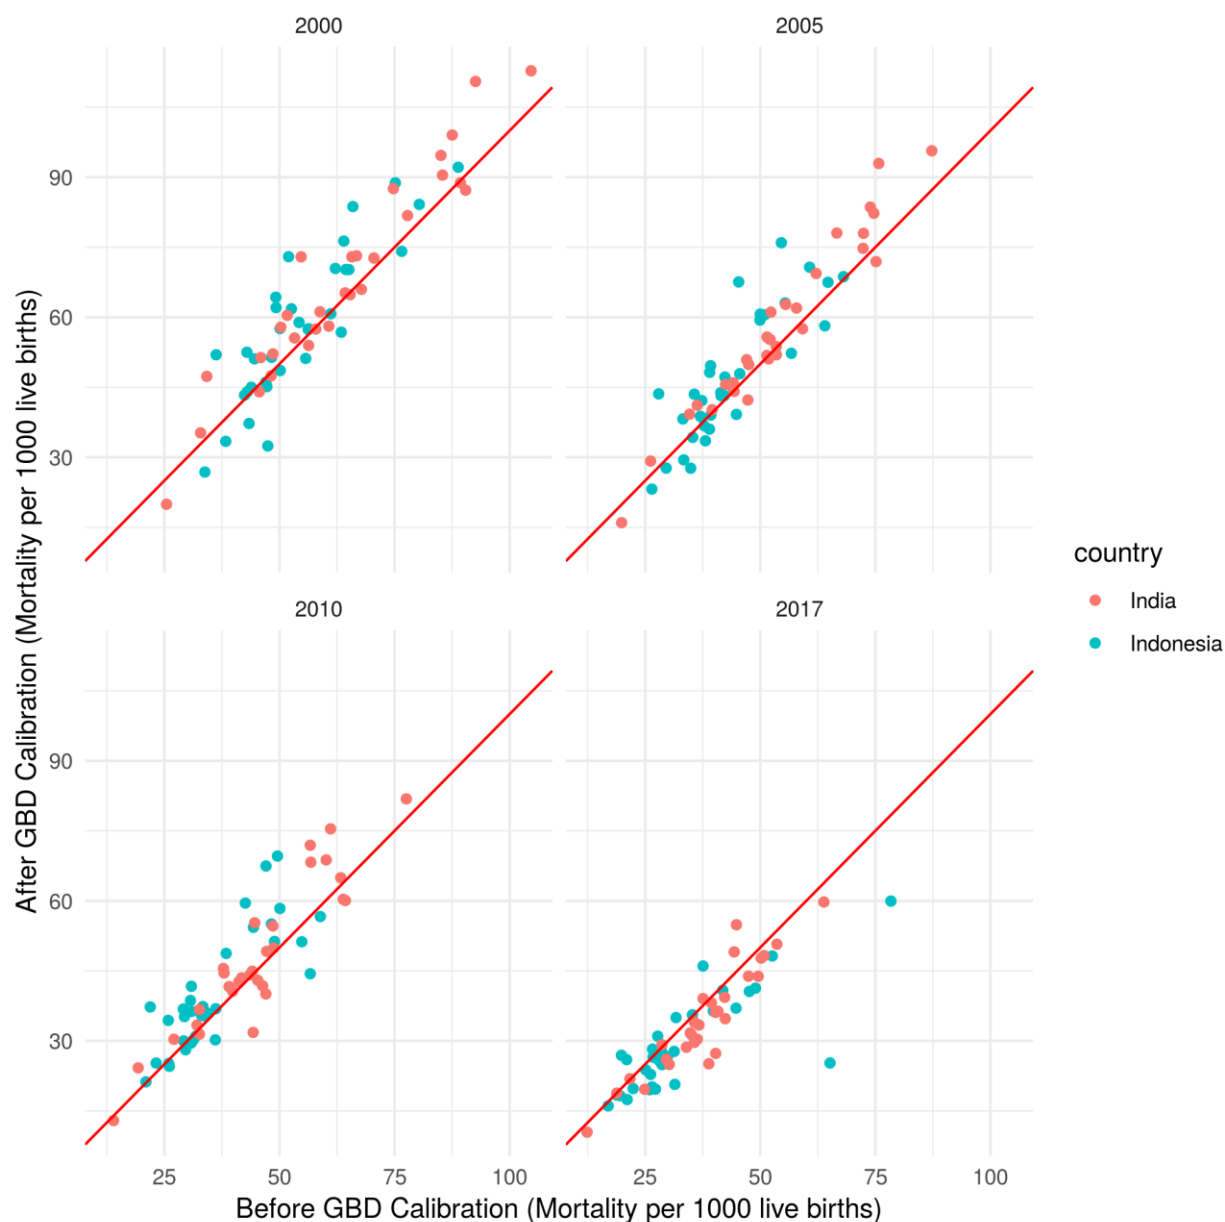

667

668



669

670 *Supplementary Figure 5.7: Pre- and post-calibration comparisons, subnational-level GBD, infant*

671 Comparison of infant mortality probability estimates for 2000, 2005, 2010, and 2017 in GBD reported  
672 subnational geographies derived by population weighting 5 x 5-km grid cell estimates before (x-axis) and  
673 after (y-axis) calibration to GBD 2017 by year.

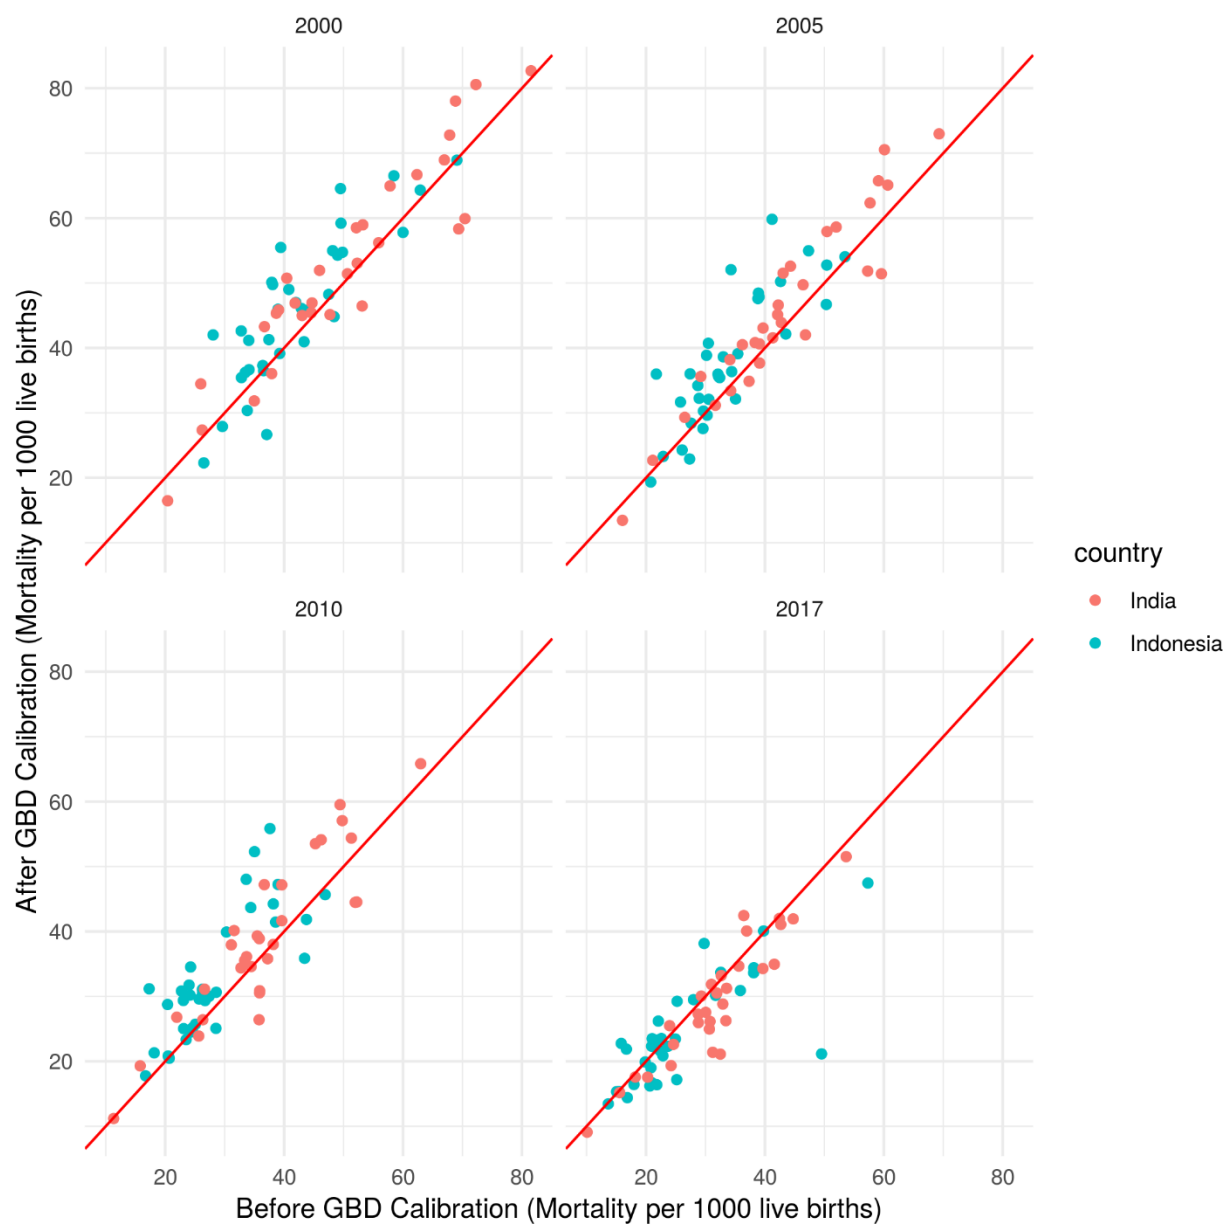

674

675

676

677 *Supplementary Figure 5.8: Pre- and post-calibration comparisons, subnational-level GBD, neonatal*

678 Comparison of neonatal mortality probability estimates for 2000, 2005, 2010, and 2017 in GBD reported  
679 subnational geographies derived by population weighting 5 x 5-km grid cell estimates before (x-axis) and  
680 after (y-axis) calibration to GBD 2017 by year.

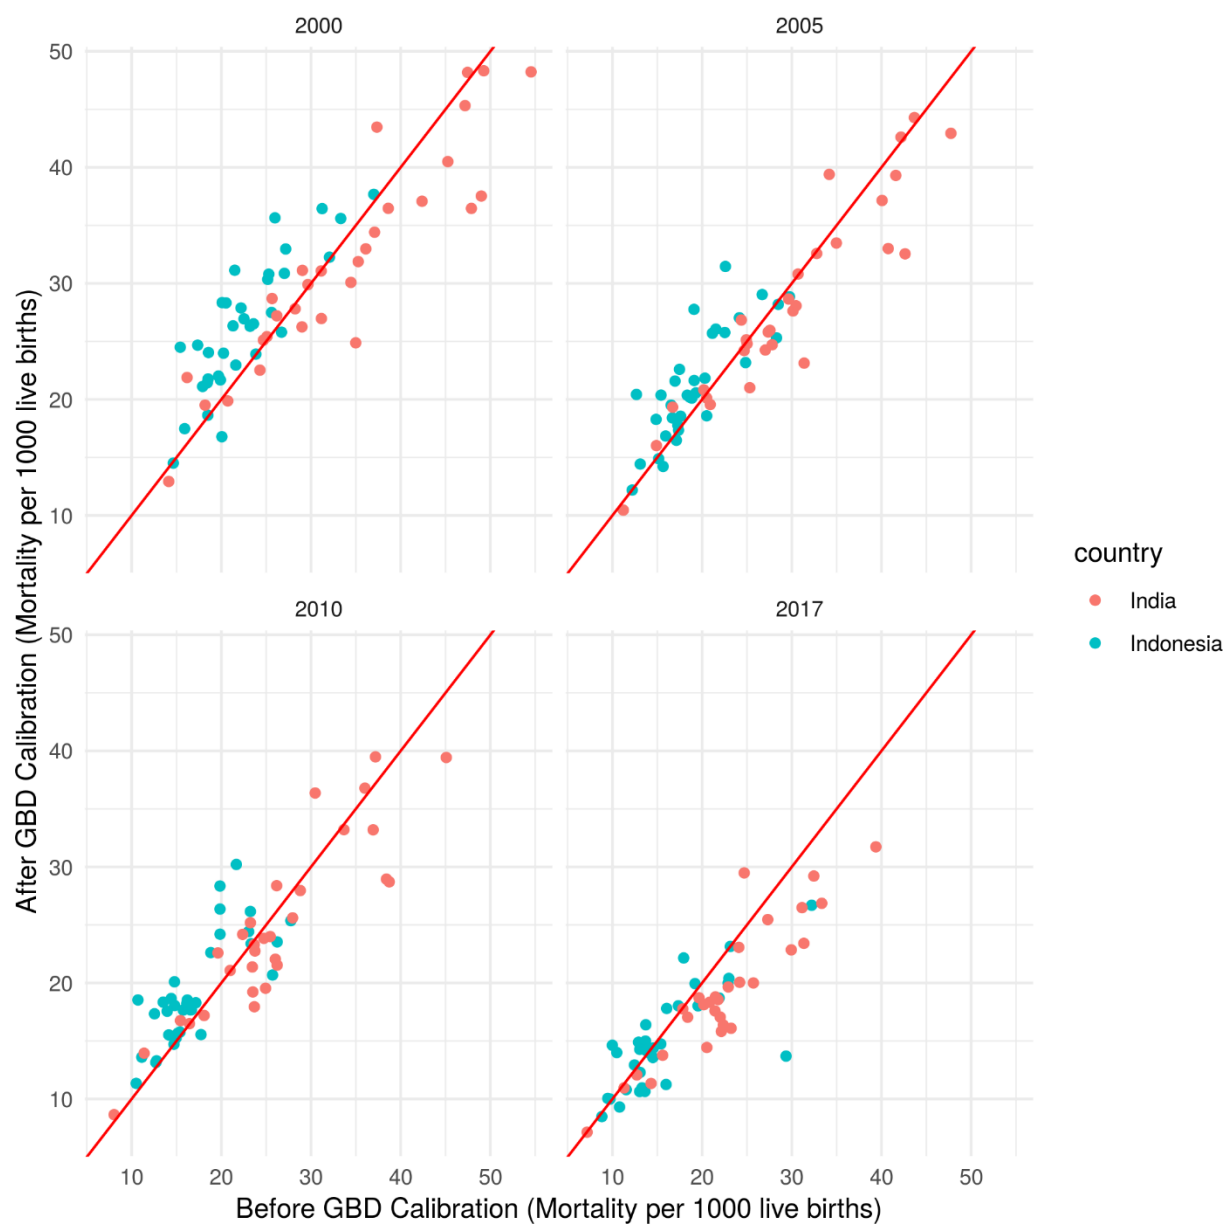

681



## 5.3 Validation

We utilized five-fold cross-validation to assess and compare model performance with respect to estimating local trends of age-specific mortality. Each fold was created by combining complete surveys into subsets of ~20% of data sources from the input data. Holding out entire surveys at a time served as a comparable approximation to the type of missingness in our data, essentially helping us to answer the question: how would our model estimates of mortality probabilities compare to empirical estimates of mortality probability from a new survey which did not inform the model?

We ran the geostatistical model described above five times for each modeling region, with each run holding out one fold. The withheld surveys in each holdout run thus gave us an empirical basis for assessing model performance. After we fit the model five times in a region, we compiled the held-out data for each fold and extracted the out of sample (OOS) estimated mortality probability at each data point. High sampling variability due to small sample sizes at the survey cluster level make data at that level generally insufficient for comparison. To address this, we aggregated each estimate from each survey to the country level as well as the first and second administrative level for each year of available data. At each level of aggregation, we took the weighted mean of empirical and estimated mortality probabilities based on sample sizes of data points. Estimates were aggregated at the draw level, and then means were taken at the aggregated level across draws. Using these aggregated data and aggregated estimate pairs, we calculated the difference between OOS empirical data estimates and modeled estimates (referred to as “errors”) and we report the following summary metrics: mean error (ME), which serves as a measure of bias; the mean of absolute errors (MAE), which serves as a measure the total variation in the errors; the correlation. In addition, we calculated 95% coverage. For this, we constructed 95% prediction intervals based on the draws from the modeled estimates. For each draw, we took a binomial sample, with sample size based on that of the empirical data. Binomial samples – representing predicted numbers of deaths – were taken at the data-draw level for each observed age, period, location, data point from each survey. Simulated deaths were aggregated to the second administrative, first administrative, and country levels for each year. Empirical observations of death counts were also aggregated at these levels for comparison. We calculated coverage as the percentage of empirical observations at each of these levels which fell between the 2.5% and 97.5% simulated prediction interval.

In addition to OOS validation, we also assessed in-sample (IS) predictive validity. For IS predictive validity, we compared modelled estimates to the training data that informed the model itself. *A priori*, we expect IS to show better results than OOS if the model behaves as expected.

### 5.3.1 Validation results

In this section we present results for IS and OOS validation.

Supplementary Table 5.1 shows summary predictive validity metrics for under-5 mortality probability estimates across levels of aggregation and for IS and OOS. In general, IS performed slightly better than

OOS, as expected. Supplementary Table 5.2 shows the same high-level summary for all three age groups, neonatal, infant, and under-5, at the second administrative level of aggregation.

Supplementary Figures 5.9 through 5.14 show the data behind these high-level summaries for under-5 mortality probability, showing comparisons of predictions versus empirical estimates for IS and OOS and for the three levels of spatial aggregation. Each point represents an estimate corresponding to a survey-year-aggregate estimate. It is clear from these scatter plots that there is considerable data variation due to small sample sizes. For second administrative level, the average number of births informing a validation point was 18, at the first administrative the average sample size was 89, and at the country level it was 1,216. As such, it is more difficult to make direct comparisons at lower levels of aggregation, since empirical estimates are noisy. This is evident by the vertical bands of values in the scatter plots which arise from ratios with smaller sample sizes. Empirical estimates made from data points with a larger sample size tend to show more agreement.

*Supplementary Table 5.1: High-level summary of validation metrics by administrative level*

High-level summary of validation metrics for under-5 mortality probability across all years and regions, for three different levels of aggregation: second administrative level (Admin 2), first administrative level (Admin 1), and country.

| Aggregation Level | IS/OOS | Mean Prediction | Mean Observed | Mean Error | Mean Absolute Error | Correlation | 95% coverage |
|-------------------|--------|-----------------|---------------|------------|---------------------|-------------|--------------|
| Admin 2           | IS     | 0.0631          | 0.0616        | -0.00148   | 0.0192              | 0.791       | 97.1%        |
| Admin 2           | OOS    | 0.0640          | 0.0616        | -0.00240   | 0.0225              | 0.725       | 96.4%        |
| Admin 1           | IS     | 0.0633          | 0.0620        | -0.00129   | 0.0127              | 0.905       | 93.1%        |
| Admin 1           | OOS    | 0.0641          | 0.0620        | -0.00218   | 0.0161              | 0.837       | 90.6%        |

*Supplementary Table 5.2: High-level summary of validation metrics by age bin*

High-level summary of validation metrics for mortality probability for each reported age bin across all years and regions, for the second administrative level aggregation.

| Age Bin  | IS/OOS | Mean Prediction | Mean Observed | Mean Error | Mean Absolute Error | Correlation | 95% Cov. |
|----------|--------|-----------------|---------------|------------|---------------------|-------------|----------|
| Neonatal | IS     | 0.0261          | 0.0255        | -0.000583  | 0.0110              | 0.564       | 96.9%    |
| Infant   | IS     | 0.045           | 0.044         | -0.00112   | 0.0158              | 0.706       | 97.3%    |
| Under-5  | IS     | 0.0631          | 0.0616        | -0.00148   | 0.0192              | 0.791       | 97.1%    |
| Neonatal | OOS    | 0.0264          | 0.0255        | -0.000866  | 0.0125              | 0.414       | 96.6%    |
| Infant   | OOS    | 0.046           | 0.044         | -0.0018    | 0.0183              | 0.604       | 96.8%    |
| Under-5  | OOS    | 0.0640          | 0.0616        | -0.00240   | 0.0225              | 0.725       | 96.4%    |

744

745     *Supplementary Figure 5.9: In-sample predictions versus aggregated data at the country level*

746 Each point represents an estimate for under-5 mortality probability for a source-year.

Validation Plot for died by Admin 0 (National)  
OOS: FALSE

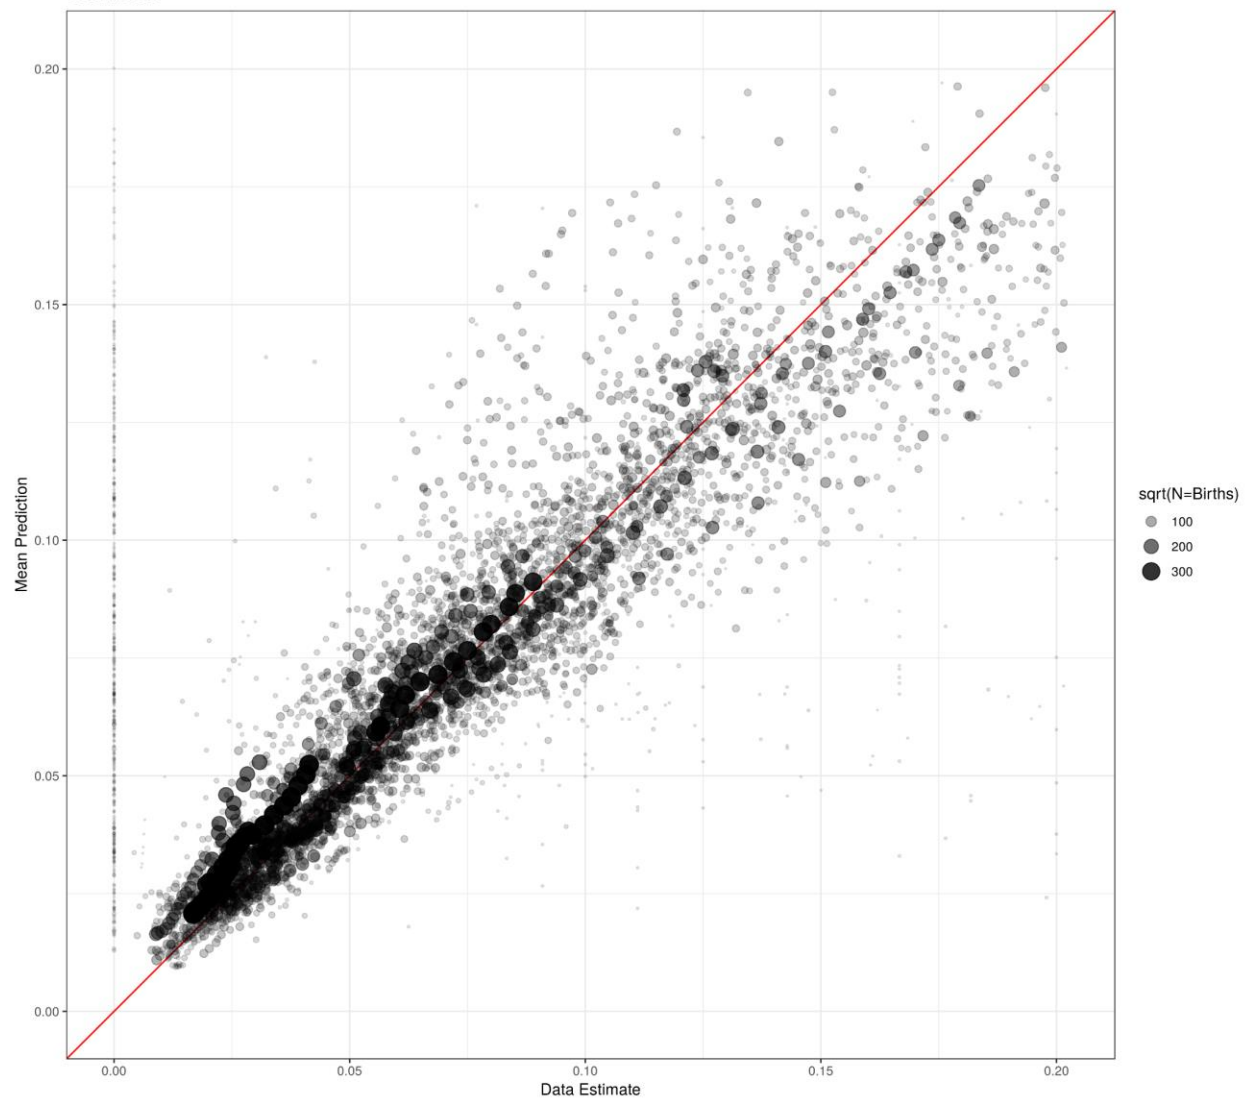

Validation Plot for died by Admin 0 (National)  
OOS: FALSE

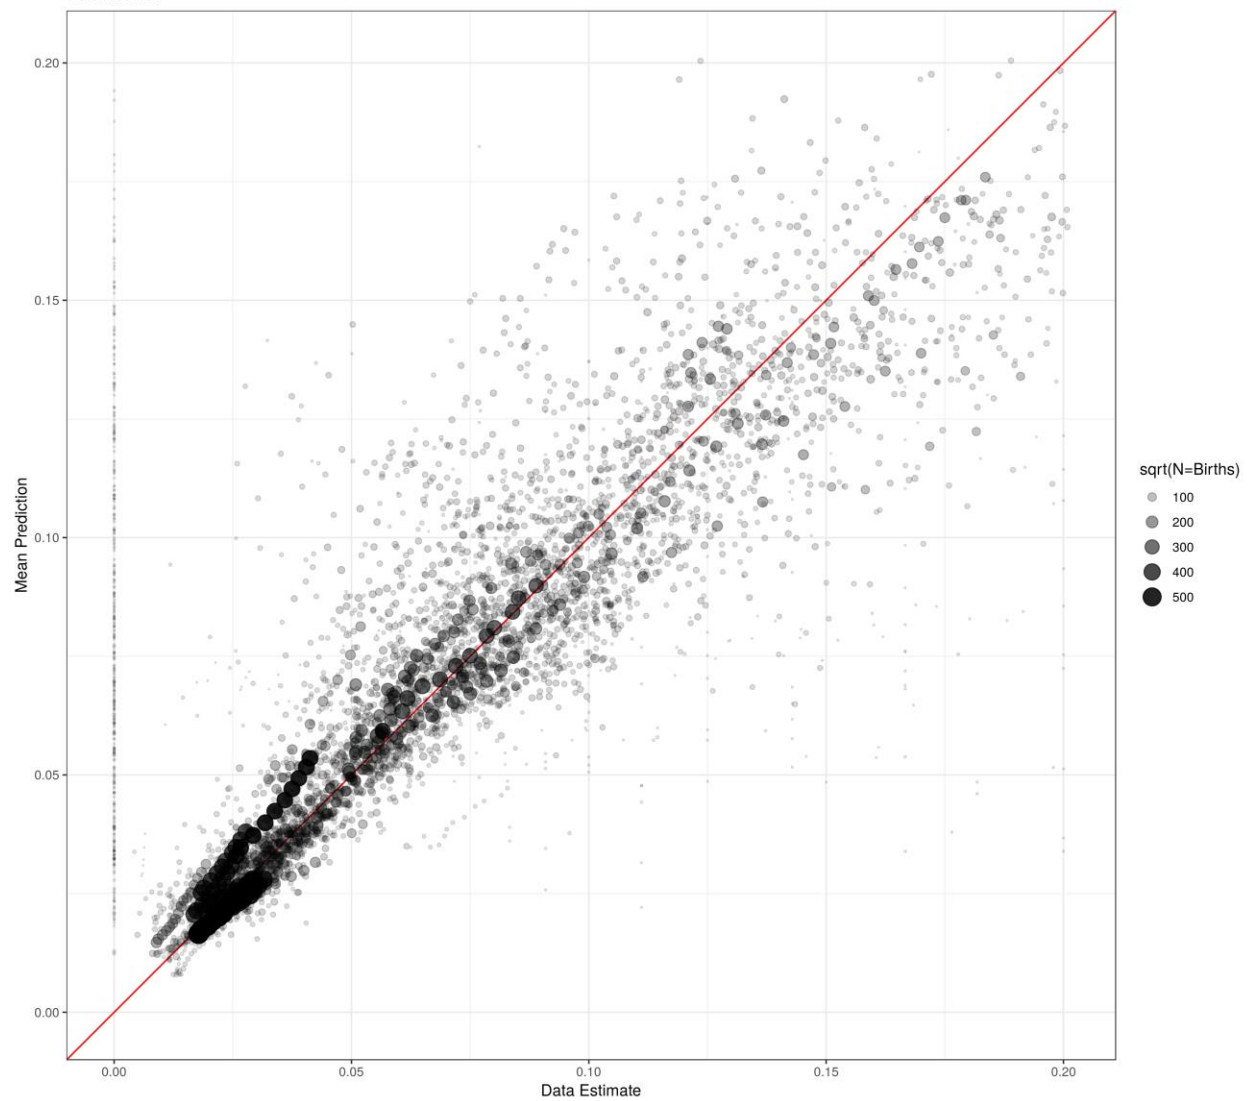

748

749

750     *Supplementary Figure 5.10: Out-of-sample predictions vs. aggregated data at the country level*

751 Each point represents an estimate for under-5 mortality probability for a source-year.



Validation Plot for died by Admin 0 (National)  
OOS: TRUE

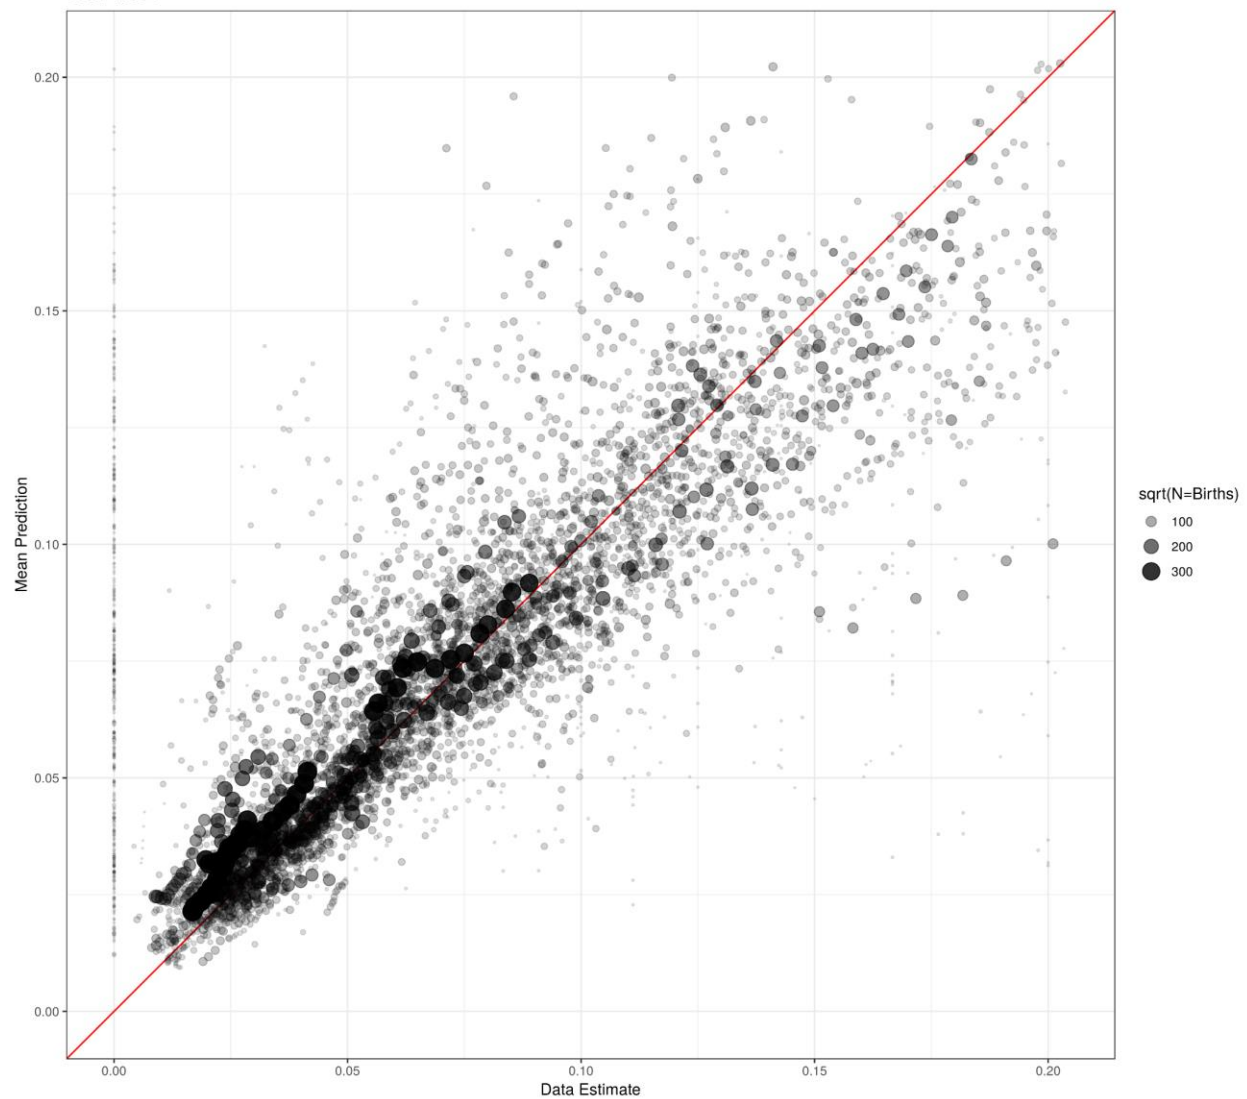

Validation Plot for died by Admin 0 (National)  
OOS: TRUE

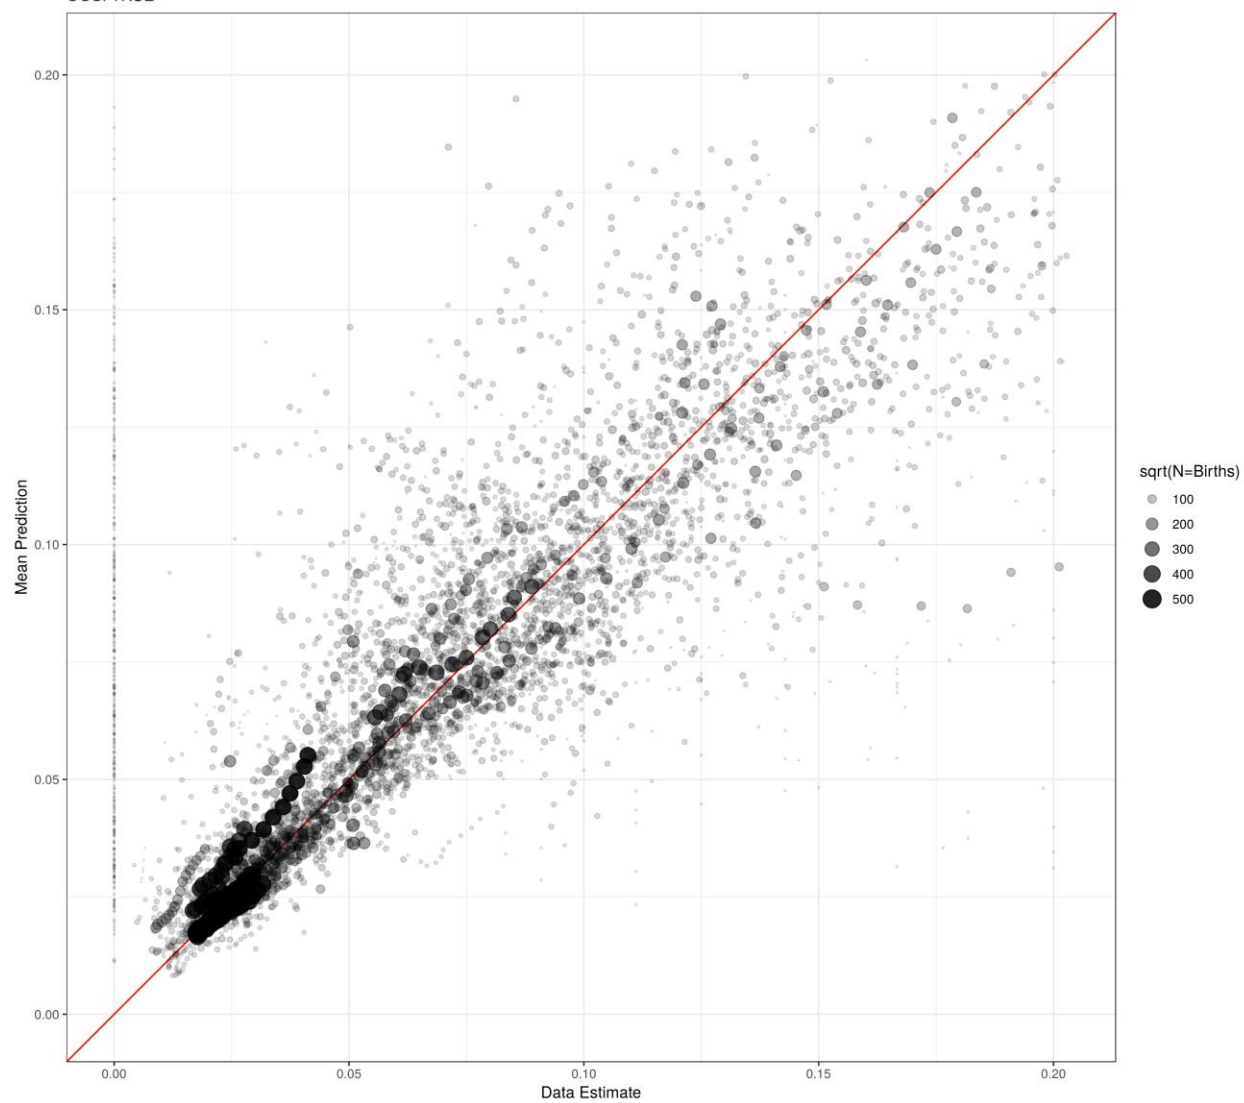

753

754

755     *Supplementary Figure 5.11: In-sample predictions vs. aggregated data at the first administrative level*

756 Each point represents an estimate for under-5 mortality probability for a source-year.

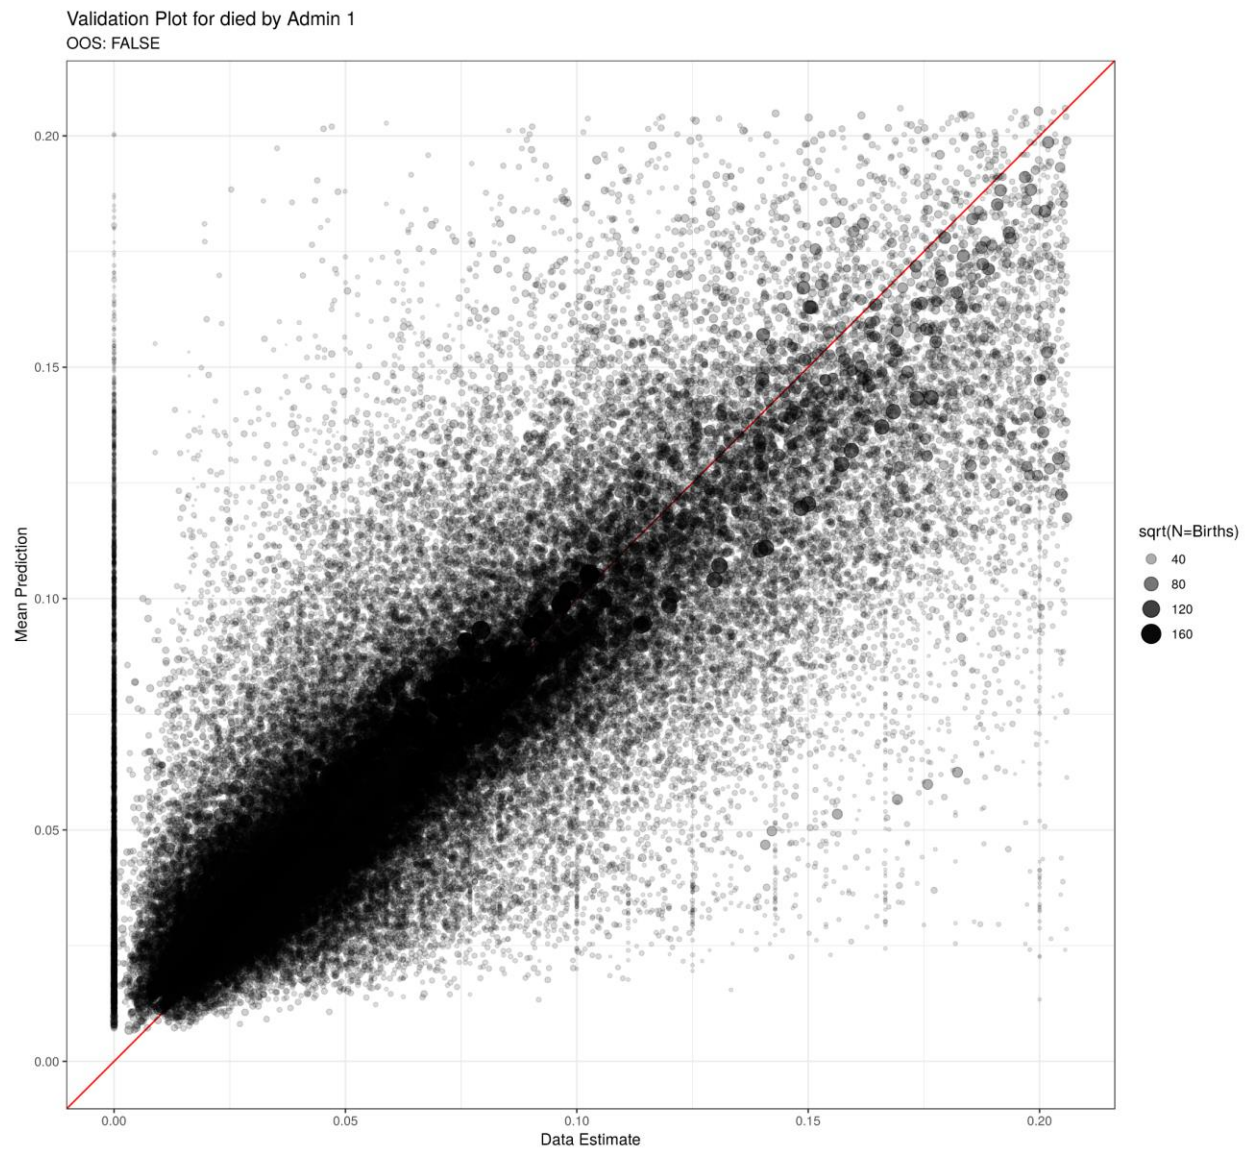

757

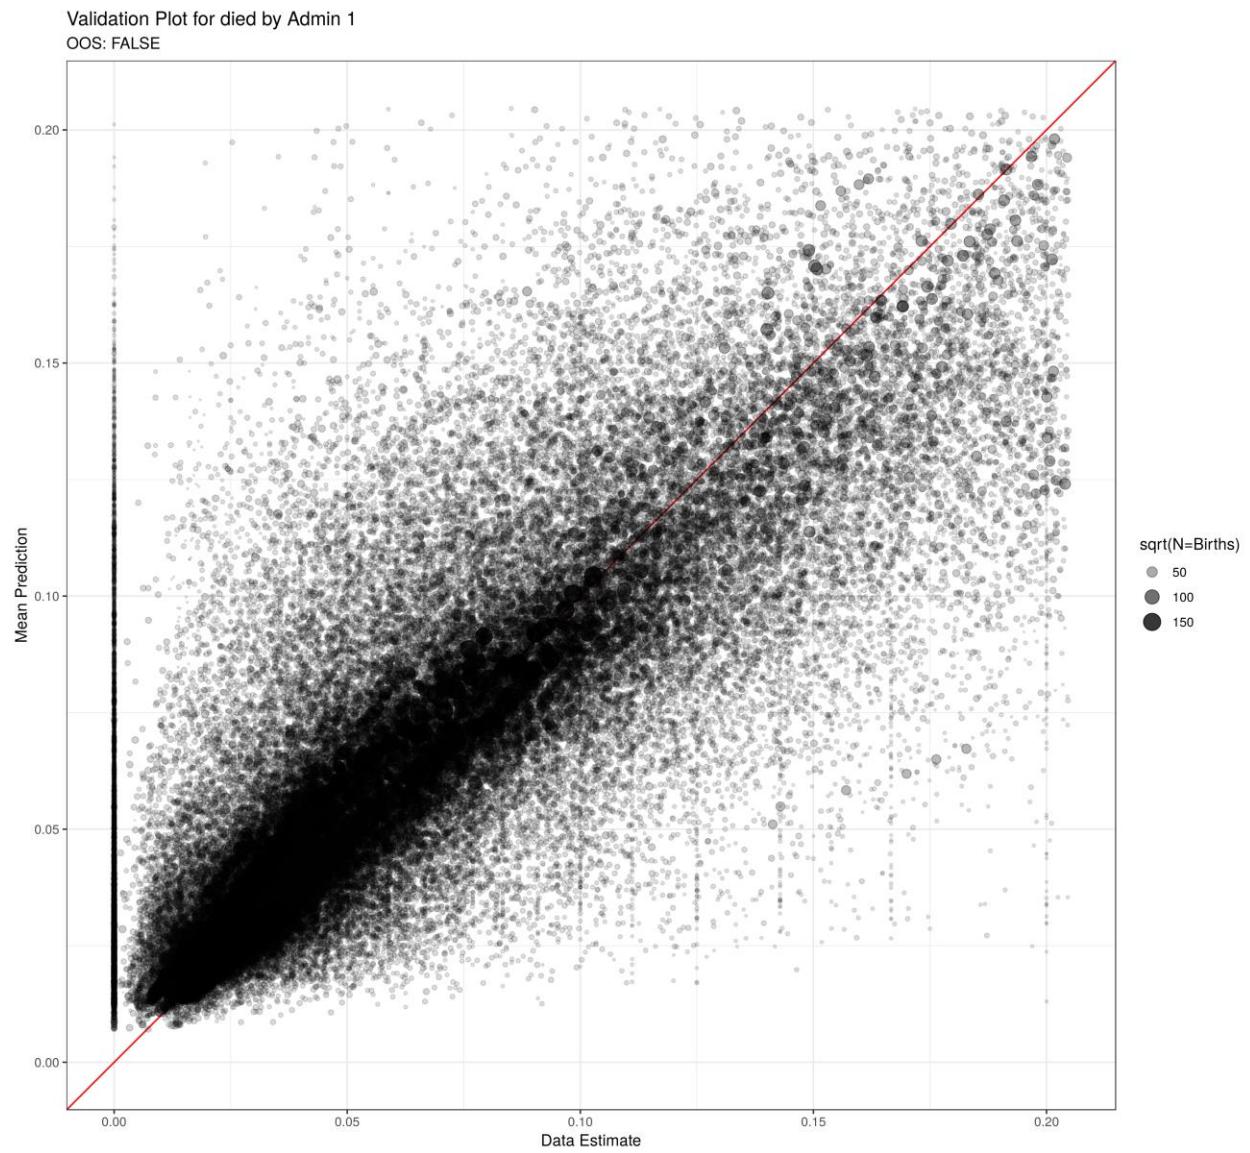

758

759

760 *Supplementary Figure 5.12: Out-of-sample predictions vs. aggregated data at the first administrative*  
761 *level*

762 Each point represents an estimate for under-5 mortality probability for a source-year.



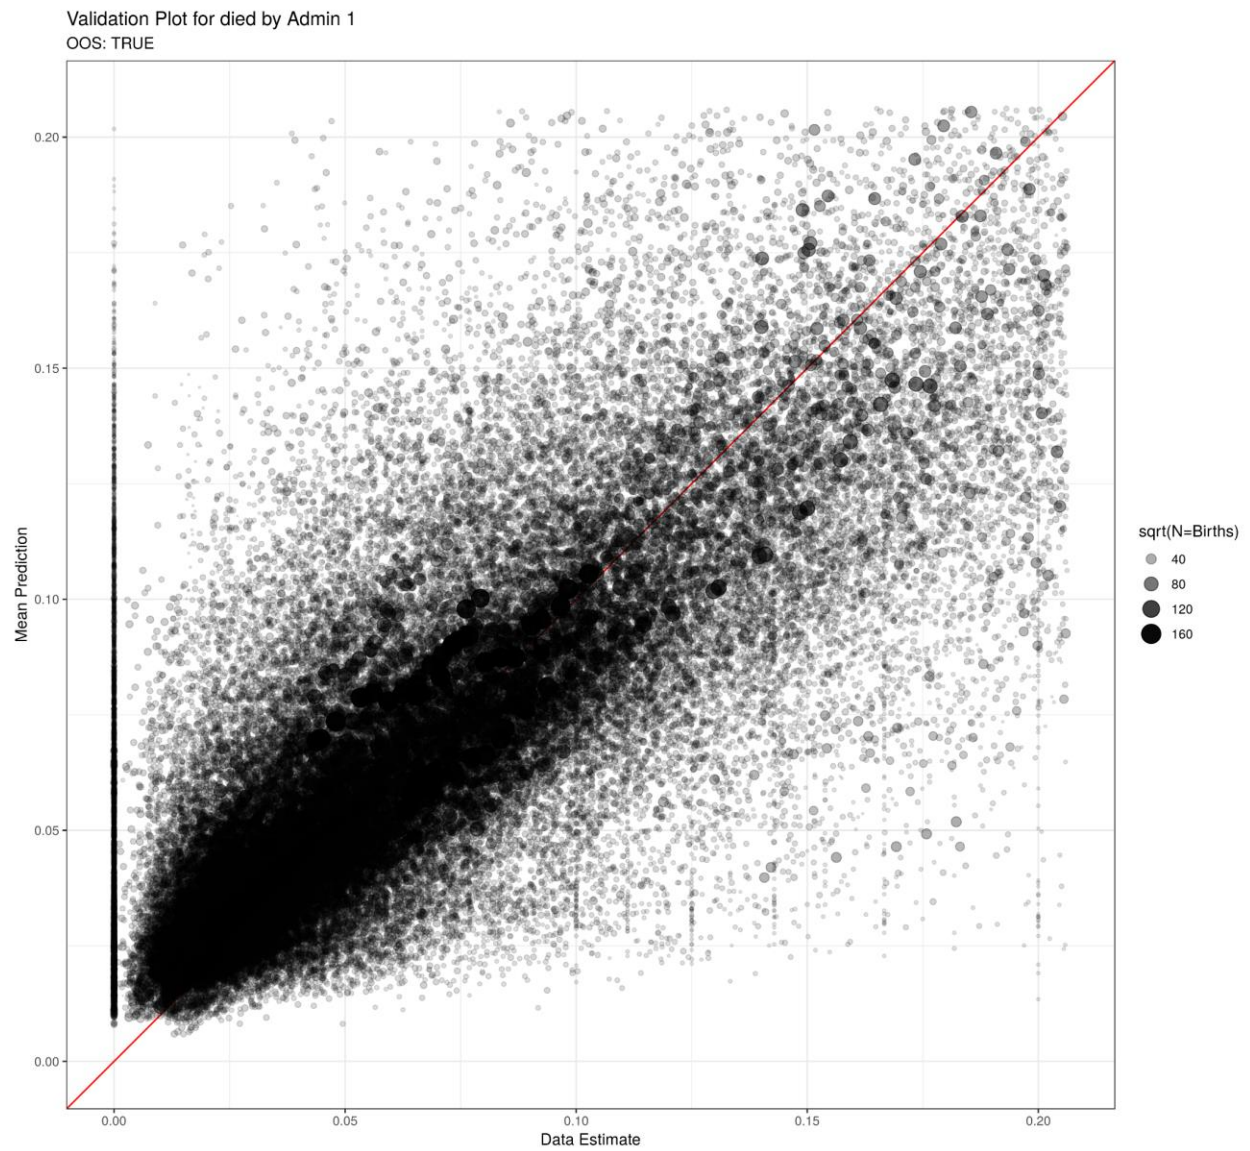

763

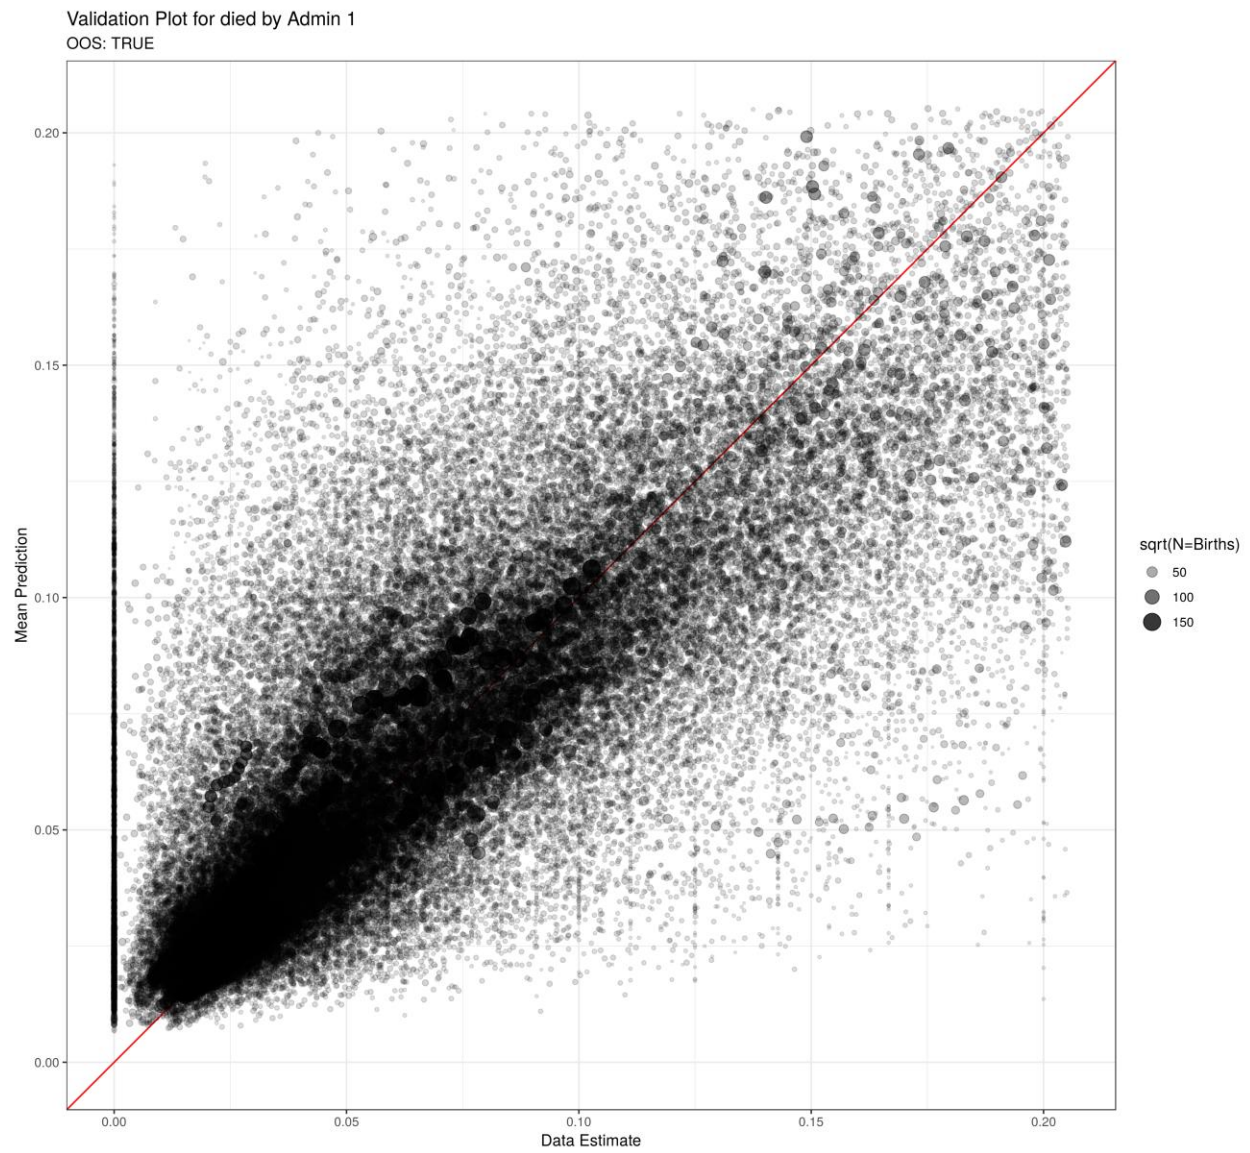

764

765

766     *Supplementary Figure 5.13: In-sample predictions vs. aggregated data at the second administrative level*

767 Each point represents an estimate for under-5 mortality probability for a source-year.

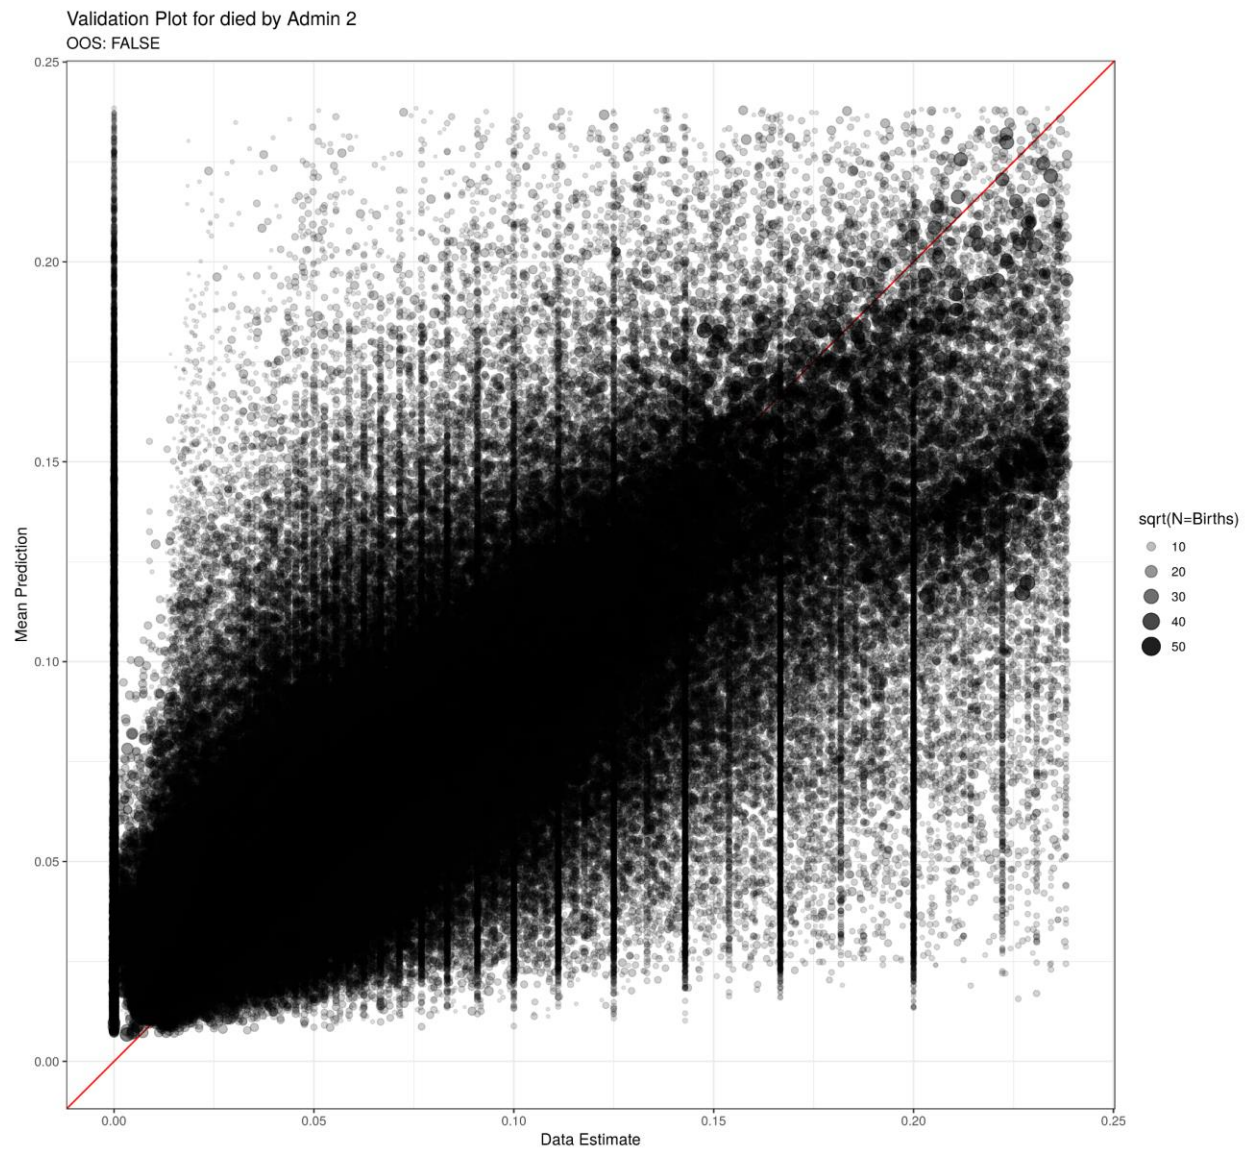



Validation Plot for died by Admin 2  
OOS: FALSE

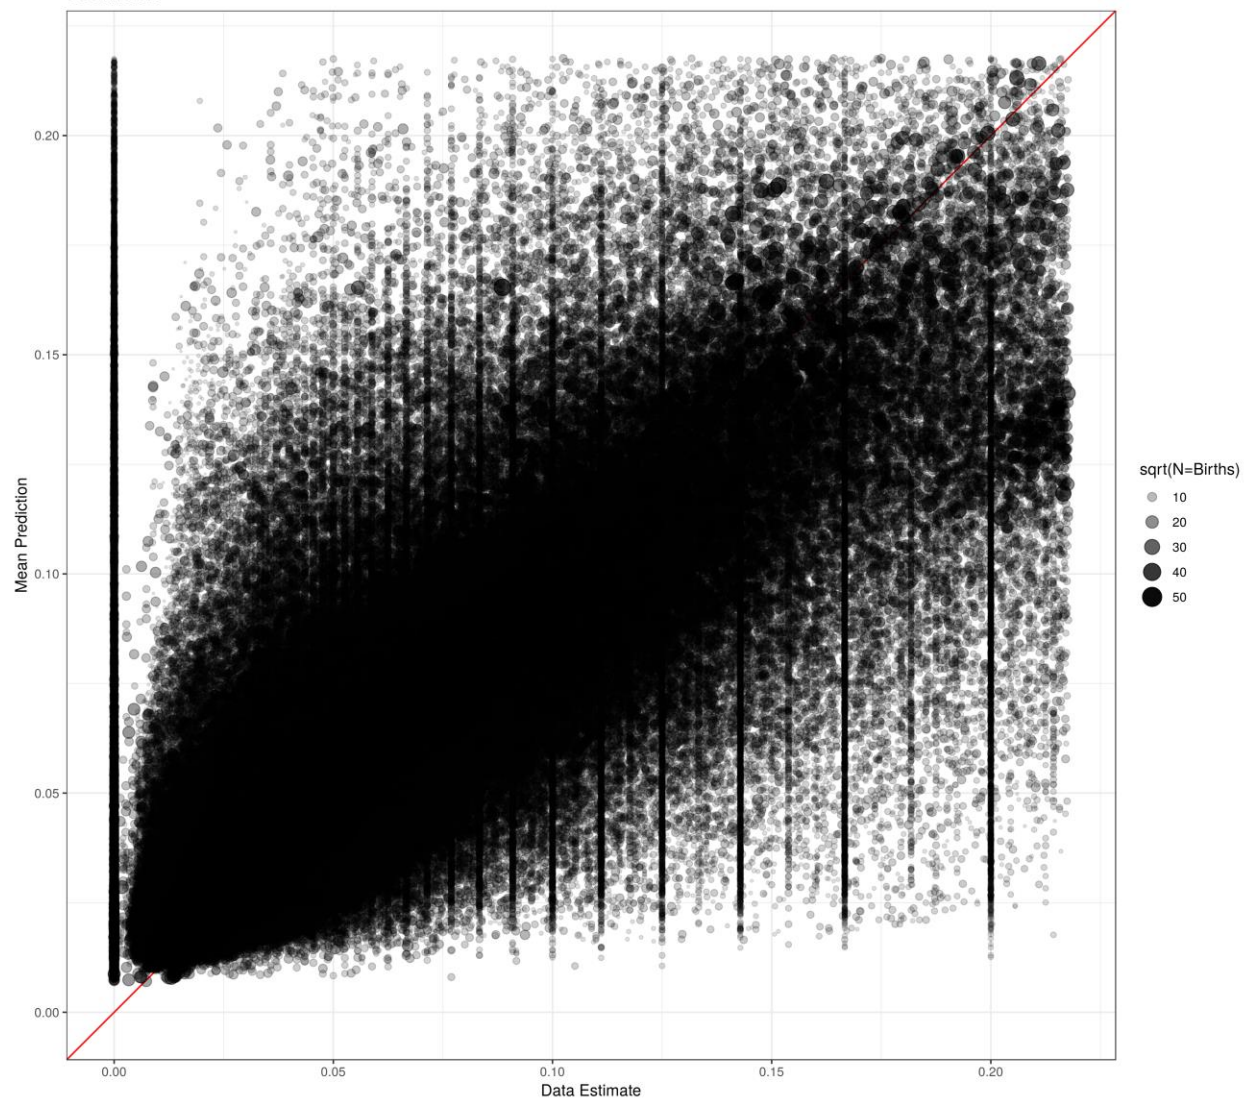

769

770

771 *Supplementary Figure 5.14: Out-of-sample predictions vs. aggregated data at the second administrative*  
772 *level*

773 Each point represents an estimate for under-5 mortality probability for a source-year.



Validation Plot for died by Admin 2  
OOS: TRUE

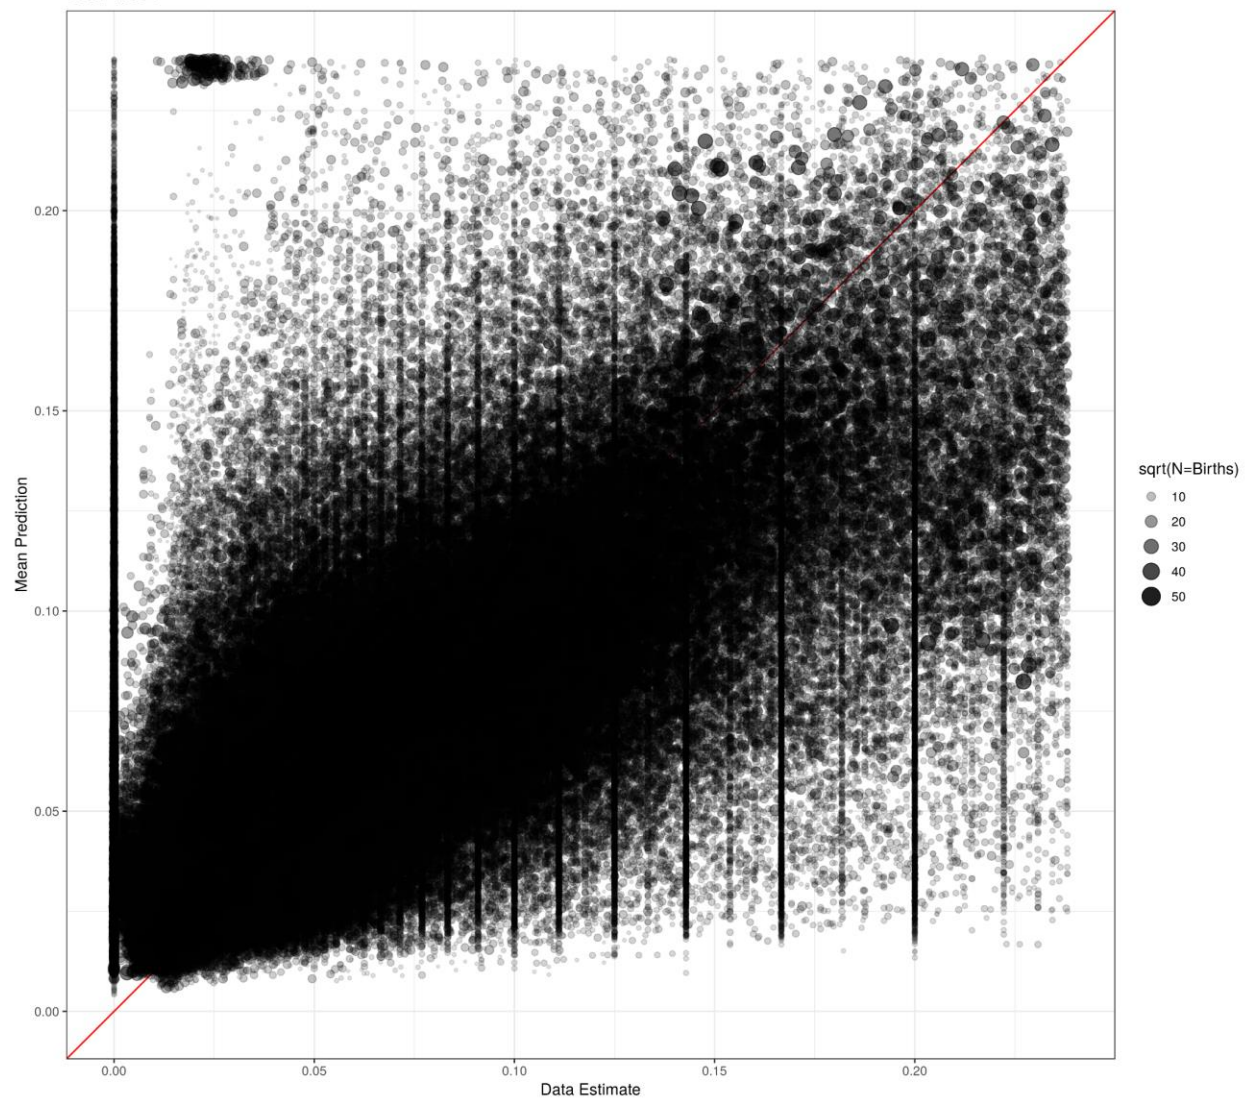

Validation Plot for died by Admin 2  
OOS: TRUE

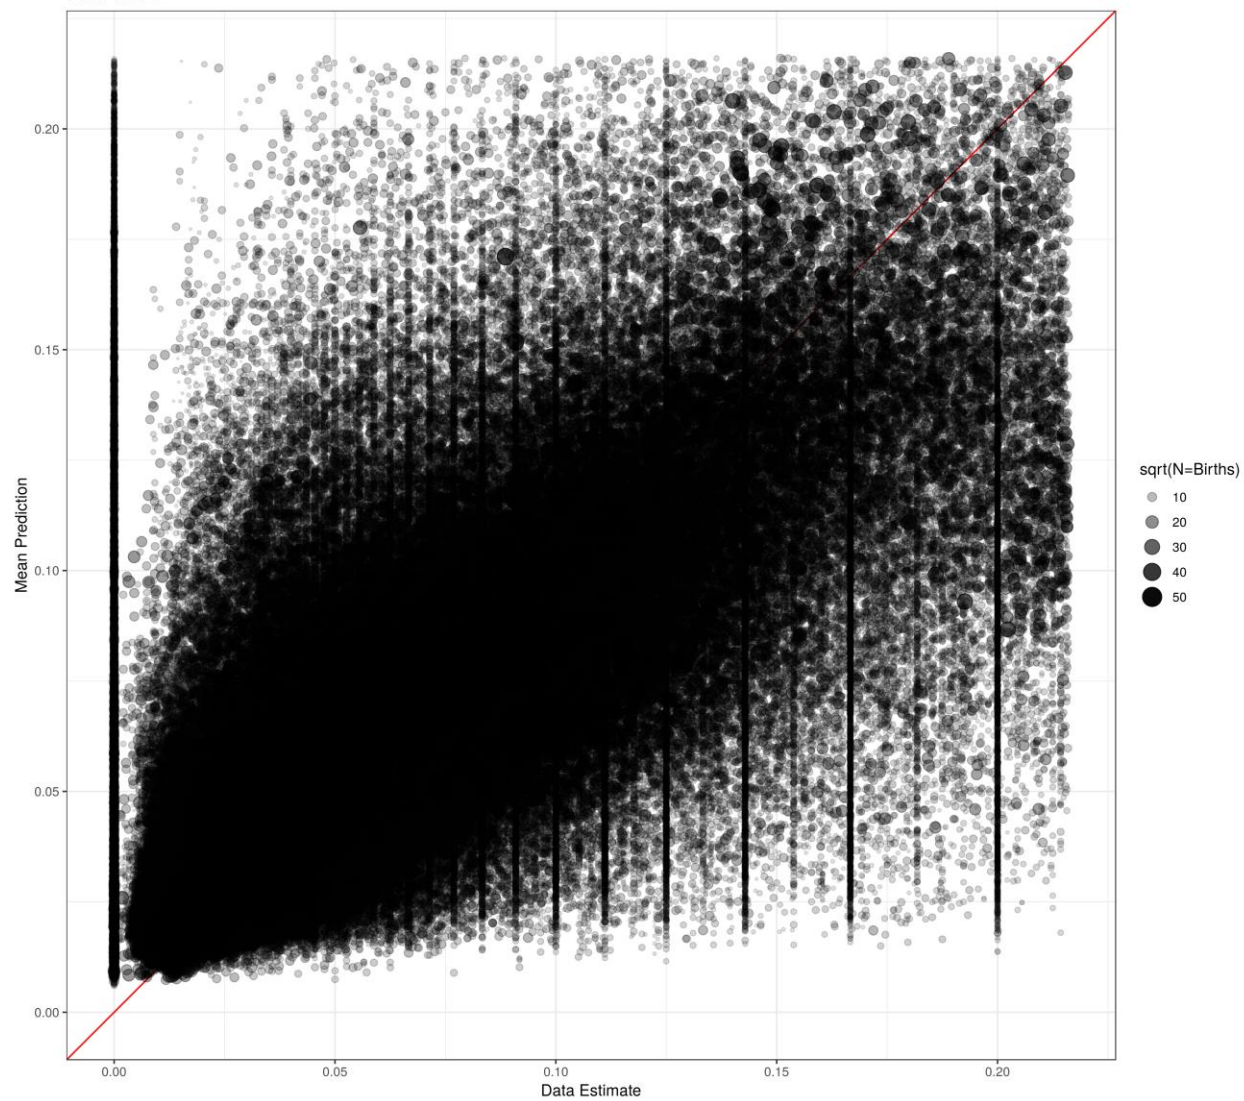

775

776

## 5.4 Other diagnostics

### 5.4.1 Comparison with previous analysis

Prior to the current analysis, we estimated mortality probabilities for neonates and under-5s in 46 African countries for four time periods: 1998–2002 (which we refer to as 2000), 2003–2007 (2005), 2008–2012 (2010), and 2012–2017 (2015)<sup>1</sup>. In this section we describe differences between those estimates and the ones we present for the current analysis.

Reasons for differences include changes in national-level estimates from GBD leading to differences in the calibration step, the addition of 44 data sources in these countries (see a list in Supplementary Table 5.3), and changes to the analytical process. Major changes to the analytical process included updates to the way SBH data were prepped, using seven age bins rather than four, and changes to the statistical model. Major changes to the statistical model included a smaller set of covariates fit linearly rather than using a generalized stacking method, jointly fitting the model across age bins and accounting for correlation across age bins in time and space, including data-source-specific random effects rather than using bias correction estimates from the GBD study, making estimates at an annual temporal scale rather than a five-year temporal scale, and using country random effects.

We compared our estimates of neonatal and under-5 mortality probabilities in these 46 countries at the second administrative level. In order to make them temporally comparable, we combined our estimates into 5-year bins at the draw level. We compared absolute and relative mean differences, and looked at the significance of the difference (whether or not we had non-overlapping uncertainty intervals at the 95% level at each location). Since we did not make estimates for 1998 or 1999 in this report, we only compared estimates for the 2005, 2010, and 2015 periods. We show comparisons in Supplementary Figures 5.15 – 5.19.

Across second administrative units, estimates for under-5 mortality probability had correlation coefficients 0.97, 0.96, and 0.94 for the 2005, 2010, and 2015 time periods, respectively. The correlation coefficients for neonatal mortality probability were 0.91, 0.87, and 0.86 for these time periods (see Supplementary Figures 5.15 – 5.16). The average relative difference for these time periods was 1.01, 1.01, and 1.03 for under-5 mortality probability and 1.01, 1.02, and 1.03 for neonatal mortality probability in these same time periods (see Supplementary Figure 5.17). The average absolute difference for these time periods was 0.14, -0.21, and 0.48 deaths per 1,000 live births for under-5 mortality and 0.06, 0.54, and 0.69 for neonatal mortality in these same time periods (see Supplementary Figure 5.18 ). Of 5,949 total administrative units, 43 (0.7%), 117 (2.0%), and 103 (1.7%) areas had significantly different results for under-5 mortality probability estimates in these years, as defined by non-overlapping uncertainty intervals. Likewise, 88 (1.5%), 98 (1.6%), and 43 (0.7%) areas had significantly different results for neonatal mortality probability estimates (see Supplementary Figure 5.19).

815 *Supplementary Figure 5.15: Comparison between mean second administrative level estimates of under-5*  
816 *mortality probability between current and previous analysis*

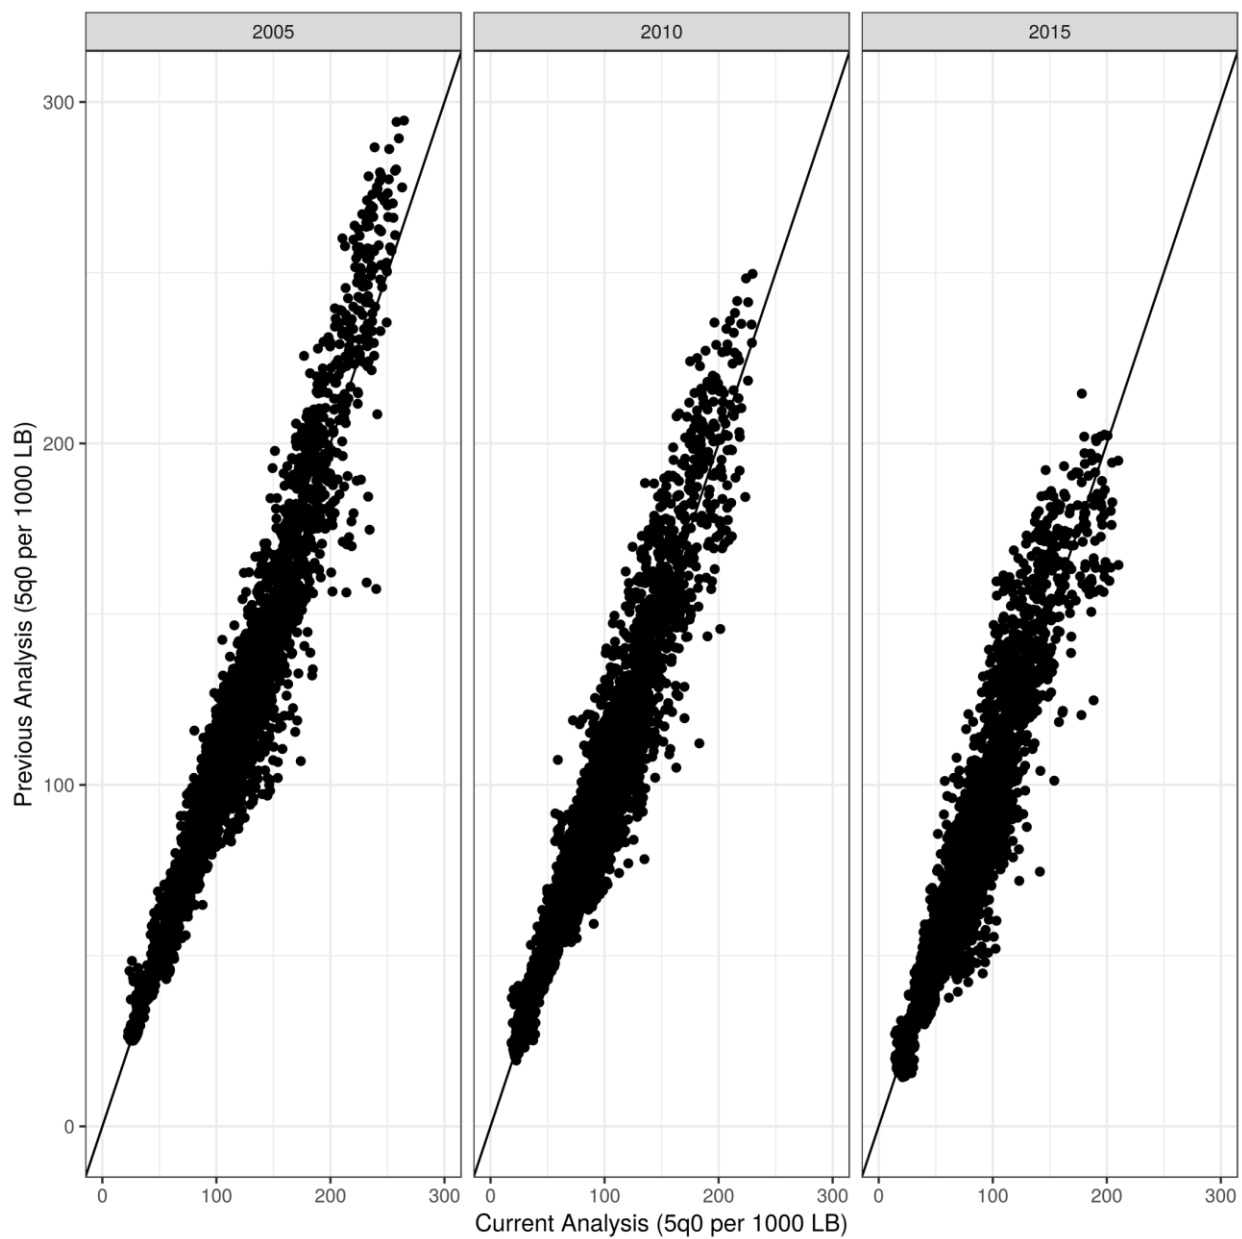

817

818

819 *Supplementary Figure 5.16: Comparison between mean second administrative level estimates of*  
820 *neonatal mortality probability between current and previous analysis*

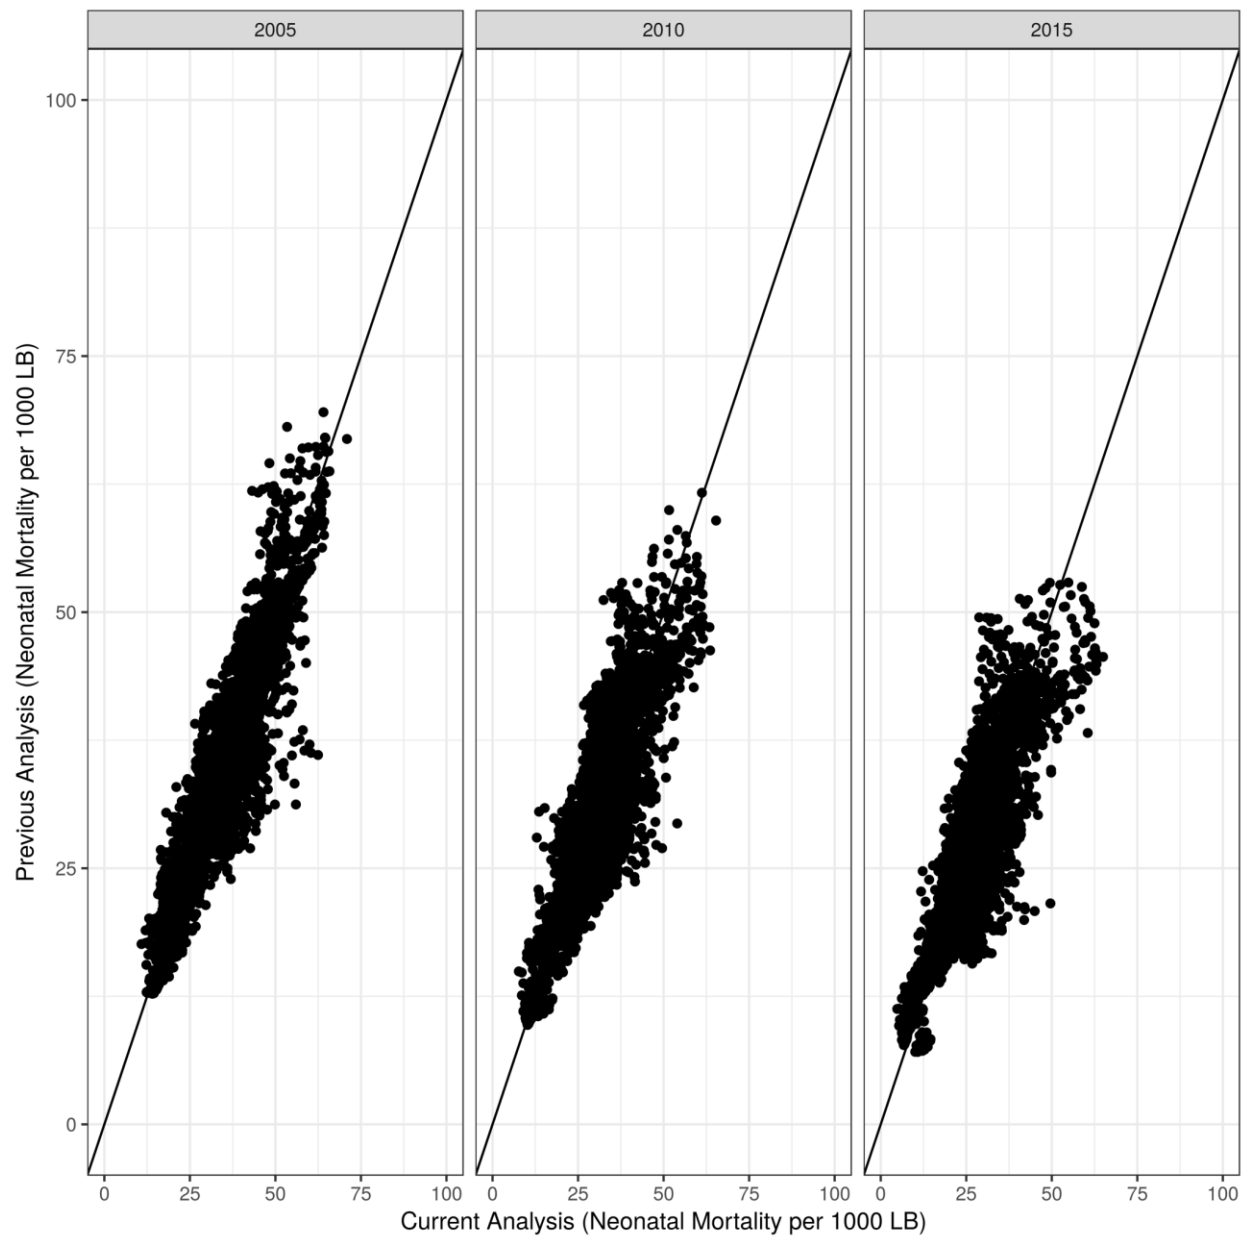

821

822

823 *Supplementary Figure 5.17: Relative difference between current and previous estimates of under-5*  
824 *mortality probability, 2015*

825 Relative difference between current and previous estimates of under-5 mortality probability for the  
826 2015 period (defined as 2013–2017) across all second administration units in the 46 countries analyzed  
827 in the previous analysis. The countries in gray were not analyzed in the previous analysis.

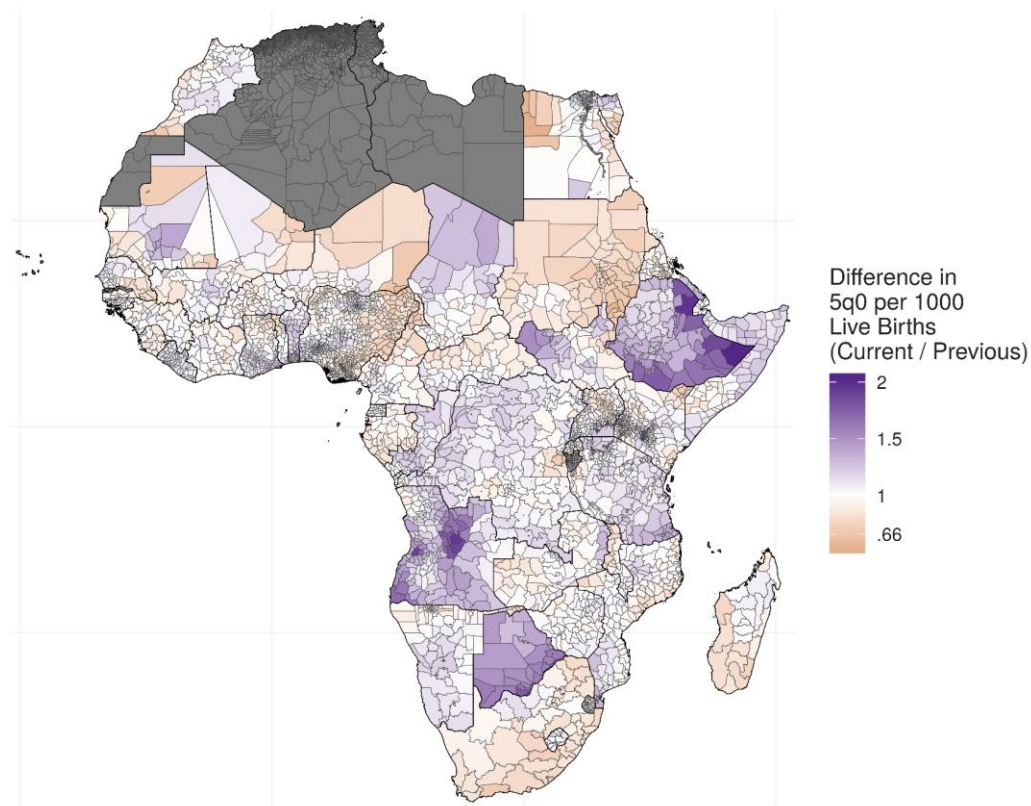

828

829



830 *Supplementary Figure 5.18: Difference between current and previous estimates of under-5 mortality*  
831 *probability, 2015*

832 Difference between current and previous estimates of under-5 mortality probability for the 2015 period  
833 (defined as 2013–2017) across all second administration units in the 46 countries analyzed in the  
834 previous analysis. The countries in gray were not analyzed in the previous analysis.

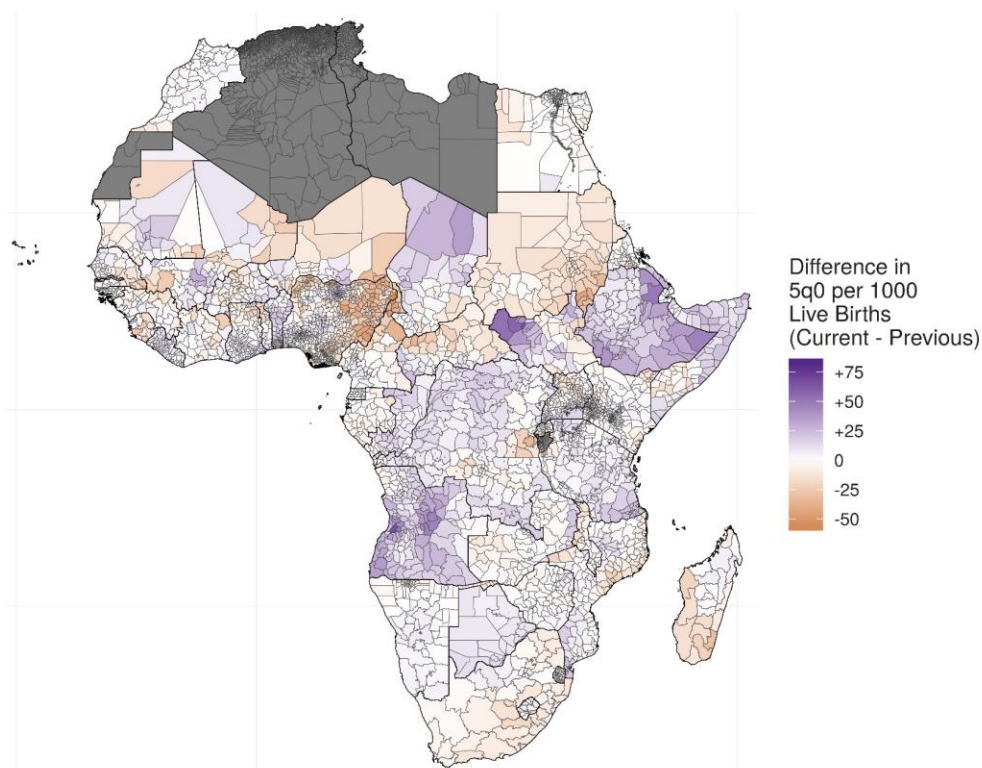

835

836

Supplementary Figure 5.19: Second administration units with significant difference between current and previous estimates of under-5 mortality probability, 2015

Second administration units with significant difference between current and previous estimates of under-5 mortality probability for the 2015 period (defined as 2013–2017). Areas in yellow had overlapping 95% uncertainty intervals. Areas in red have estimates in the current analysis which are higher and whose 95% UIs do not overlap with those from the previous analysis. Areas in blue have estimates in the current analysis which are lower and whose 95% UIs do not overlap with those from the previous analysis. Areas in gray were not analyzed in the previous analysis.

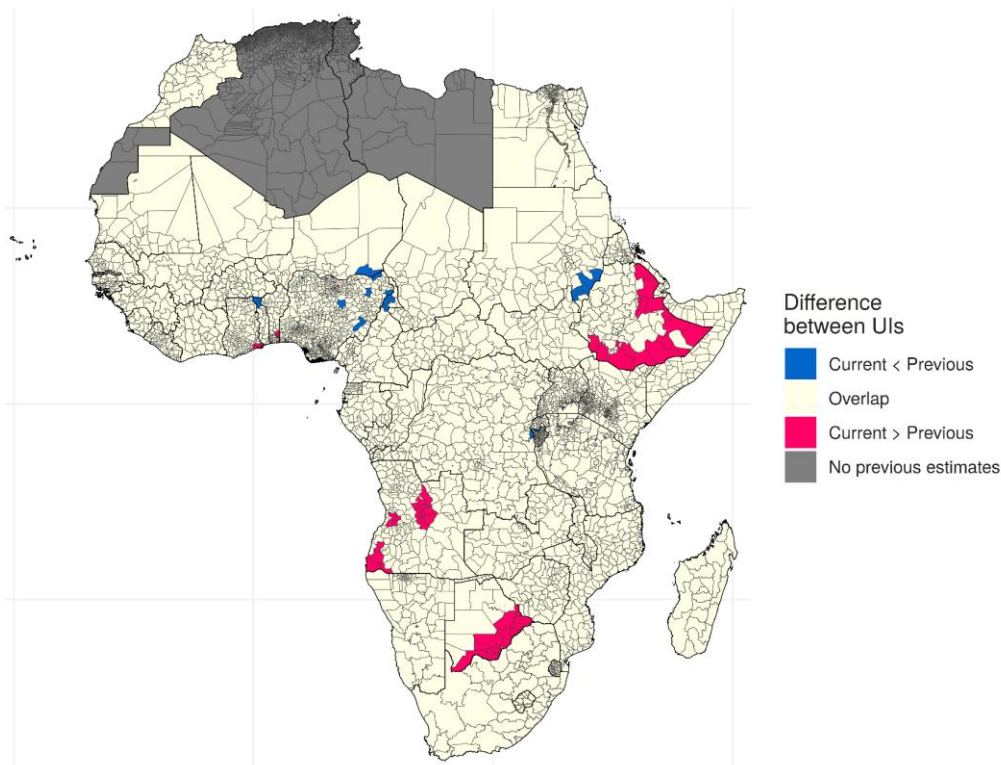



| GHDx ID | Country               | Year | Data type | Survey Title                                                                                              |
|---------|-----------------------|------|-----------|-----------------------------------------------------------------------------------------------------------|
| 218555  | Angola                | 2016 | CBH       | Angola Demographic and Health Survey 2015–2016                                                            |
| 367347  | Benin                 | 2002 | SBH       | Benin Population and Housing Census 2002 – IPUMS                                                          |
| 206075  | Benin                 | 2014 | CBH       | Benin Multiple Indicator Cluster Survey 2014                                                              |
| 22125   | Botswana              | 2008 | CBH       | Botswana Family Health Survey 2007–2008                                                                   |
| 286766  | Burundi               | 2016 | CBH       | Burundi Demographic and Health Survey 2016                                                                |
| 244455  | Cameroon              | 2014 | CBH       | Cameroon Multiple Indicator Cluster Survey 2014                                                           |
| 218611  | Cote d'Ivoire         | 2016 | CBH       | Côte d'Ivoire Multiple Indicator Cluster Survey 2016                                                      |
| 153507  | Ethiopia              | 2014 | CBH       | Ethiopia Mini Demographic and Health Survey 2014                                                          |
| 218568  | Ethiopia              | 2016 | CBH       | Ethiopia Demographic and Health Survey 2016                                                               |
| 160576  | Ghana                 | 2008 | CBH       | Ghana District Multiple Indicator Cluster Survey 2007–2008                                                |
| 286788  | Ghana                 | 2016 | SBH       | Ghana Malaria Indicator Survey 2016                                                                       |
| 218572  | Ghana                 | 2017 | CBH       | Ghana Special Demographic and Health Survey 2017                                                          |
| 303458  | Guinea                | 2016 | CBH       | Guinea Multiple Indicator Cluster Survey 2016                                                             |
| 367585  | Lesotho               | 2006 | SBH       | Lesotho Population and Housing Census 2006 – IPUMS                                                        |
| 286768  | Liberia               | 2016 | SBH       | Liberia Malaria Indicator Survey 2016                                                                     |
| 248224  | Mali                  | 2015 | CBH       | Mali Multiple Indicator Cluster Survey 2015                                                               |
| 267343  | Mauritania            | 2015 | CBH       | Mauritania Multiple Indicator Cluster Survey 2015                                                         |
| 157060  | Mozambique            | 2015 | CBH       | Mozambique AIDS Indicator Survey 2015                                                                     |
| 218613  | Nigeria               | 2017 | CBH       | Nigeria Multiple Indicator Cluster Survey with National Immunization Coverage Survey Supplement 2016–2017 |
| 234733  | Republic of the Congo | 2014 | CBH       | Congo Multiple Indicator Cluster Survey 2014–2015                                                         |
| 367645  | Rwanda                | 2012 | SBH       | Rwanda Population and Housing Census 2012 – IPUMS                                                         |
| 350836  | Rwanda                | 2017 | SBH       | Rwanda Malaria Indicator Survey 2017                                                                      |
| 287639  | Senegal               | 2015 | CBH       | Senegal Dakar Multiple Indicator Cluster Survey 2015–2016                                                 |
| 286772  | Senegal               | 2016 | CBH       | Senegal Continuous Demographic and Health Survey 2016                                                     |
| 353526  | Senegal               | 2017 | CBH       | Senegal Continuous Demographic and Health Survey 2017                                                     |
| 286773  | Sierra Leone          | 2016 | SBH       | Sierra Leone Malaria Indicator Survey 2016                                                                |

|        |              |      |     |                                                                                         |
|--------|--------------|------|-----|-----------------------------------------------------------------------------------------|
| 218619 | Sierra Leone | 2017 | CBH | Sierra Leone Multiple Indicator Cluster Survey 2017                                     |
| 20798  | South Africa | 2003 | SBH | South Africa Demographic and Health Survey 2003–2004                                    |
| 280803 | South Africa | 2016 | SBH | South Africa Community Survey 2016                                                      |
| 350798 | Tanzania     | 2017 | SBH | Tanzania Malaria Indicator Survey 2017                                                  |
| 91506  | The Gambia   | 2010 | SBH | Gambia Multiple Indicator Cluster Survey 2010                                           |
| 359318 | Togo         | 2017 | SBH | Togo Malaria Indicator Survey 2017                                                      |
| 264959 | Uganda       | 2014 | SBH | Uganda Living Standards Measurement Survey – Integrated Survey on Agriculture 2013–2014 |
| 286780 | Uganda       | 2016 | CBH | Uganda Demographic and Health Survey 2016                                               |
| 367747 | Zimbabwe     | 2012 | SBH | Zimbabwe Population Census 2012 – IPUMS                                                 |

#### 5.4.2 Covariates out of range

Covariate values were extracted at each data point based on year and location. These values were then used in the statistical model, and the spatial covariate surfaces were then used in prediction. We checked the extent to which geospatial covariate surfaces had grid cell values that fell out of the range of values observed in the model training data.

Overall, we found we had good coverage of covariates, with training data representing the range of covariates values used in predictions in most areas. Comparing against the population surface from WorldPop, we found that only 0.29% of the total population lived in areas where at least one covariate had values out of the range observed in the training data. Supplementary Figure 5.20 shows the percentage of population across each year from 2000 to 2017 which lived outside of the range of at least one covariate. 2001 was the year with the greatest covariate coverage, with only 0.050% of the population living outside the training data range of at least one covariate, while 2017 was the year with the worst coverage, with 0.84% of the population living outside that training data range of at least one covariate. There is a trend toward less population coverage in more recent years because there is less data in more recent years, due to the fact that birth histories supply retrospective time series. Supplementary Figure 5.21 summarizes the locations of these uncovered areas, with the color scale indicating the percentage of covariates used in the area which were out of range, across all years. Areas with darker blue colors had more of their predictive covariates out of range in the training data.

871 *Supplementary Figure 5.20: Percentage of the population living outside of the training data range of at*  
872 *least one covariate*

873 Percentage is calculated for each year modeled 2000–2017.

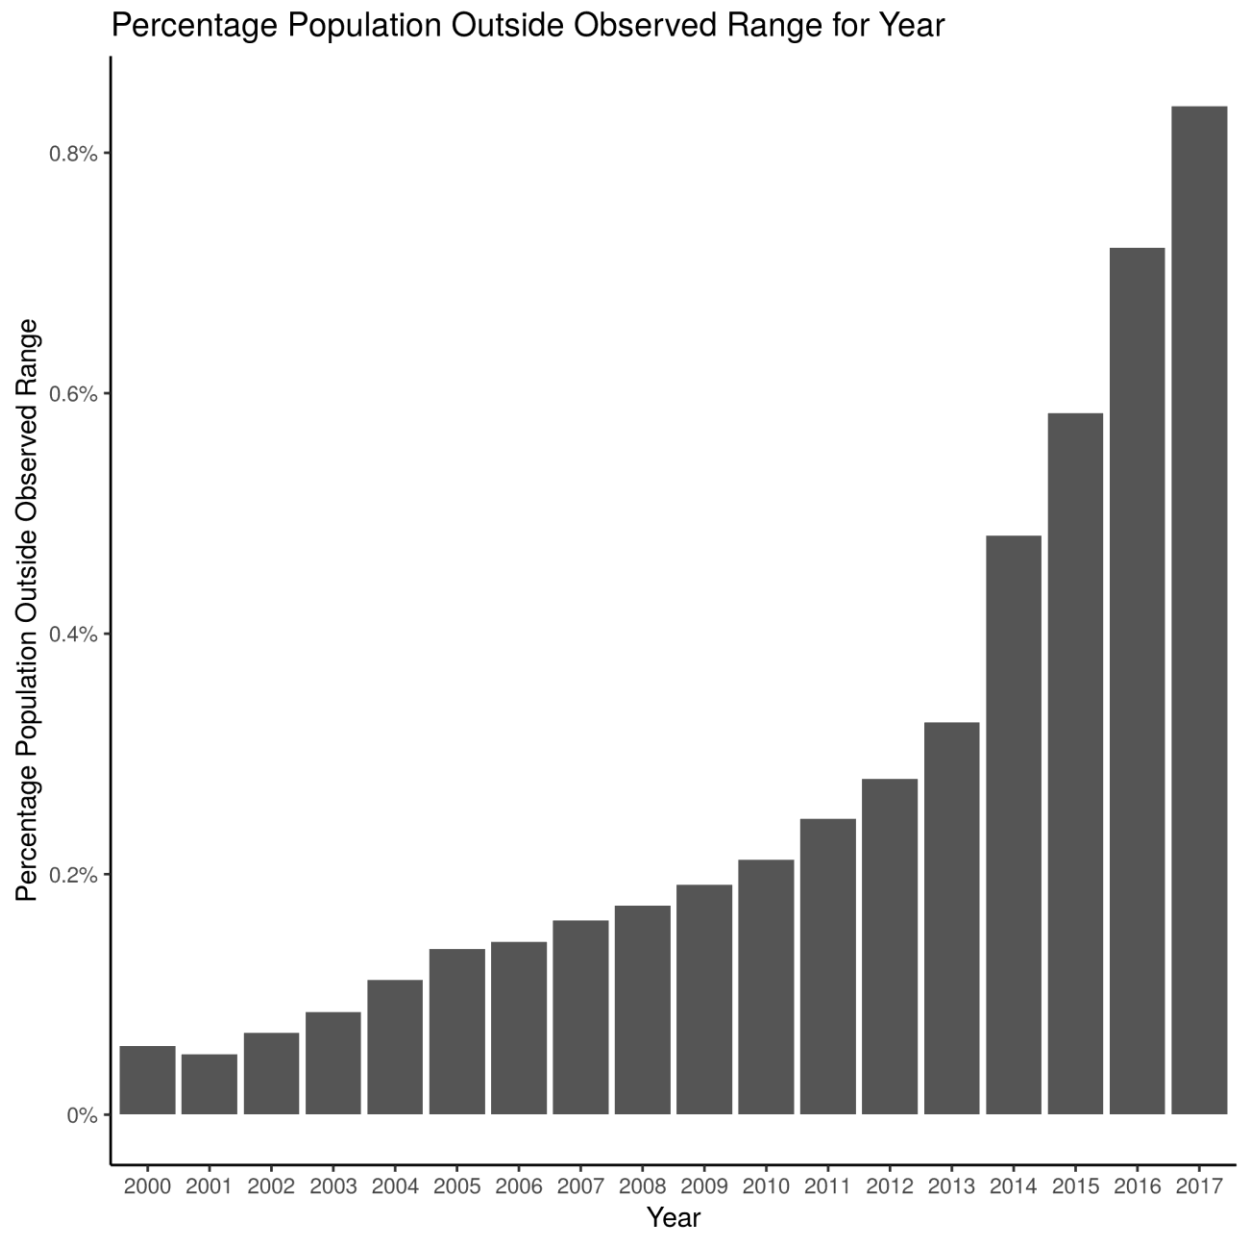

874

875

Supplementary Figure 5.21: Grid cells with covariate values outside the range of values observed in the model training data

Scale indicates the percentage of covariates covering any given grid cell with values not in range of training data, with increasing number of covariates as the color scales to blue. Areas in gray had covariate values that were completely in the range observed in the training data. This was most common in very sparsely populated desert or jungle areas.

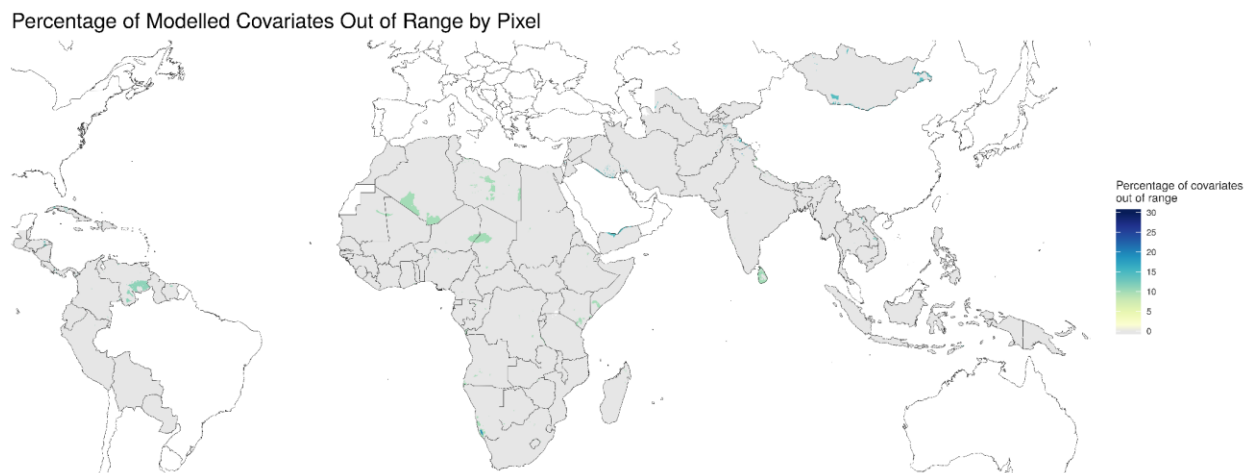

#### 5.4.3 National-level time series plots

Simple time series plots with raw data overlaid on time series can be helpful to assess general in sample fits on the full model. Supplementary Figure 5.22 shows pre-calibration trends and data aggregates at the national level for under-5 mortality probability. Fitted model estimates follow the input data. Furthermore, we can see that uncertainty intervals tend to be wider where data are lacking, see for example Equatorial Guinea (GNQ). Supplementary Figure 5.23 shows the same trends after calibration to GBD; the similarity with Supplementary Figure 5.22 indicates that calibration only had a small effect at this level, and that the data and estimates generally agreed with estimates produced via GBD methodology. It is evident that certain aspects of the GBD analytical process did affect results in certain countries. For example, in Haiti (HTI) a significant death shock due to the 2010 earthquake was not evident in the raw data or geostatistical model. GBD has developed methodologies to deal with such fatal discontinuities<sup>7</sup> and by calibrating to GBD estimates, we can take advantage of these improvements. Future research efforts should focus on integrating geographically specific fatal discontinuities into geospatial mortality estimation.

901 *Supplementary Figure 5.22: Raw data aggregates and estimated trends before calibration to GBD,*  
 902 *under-5 mortality probability, 2000 to 2017*

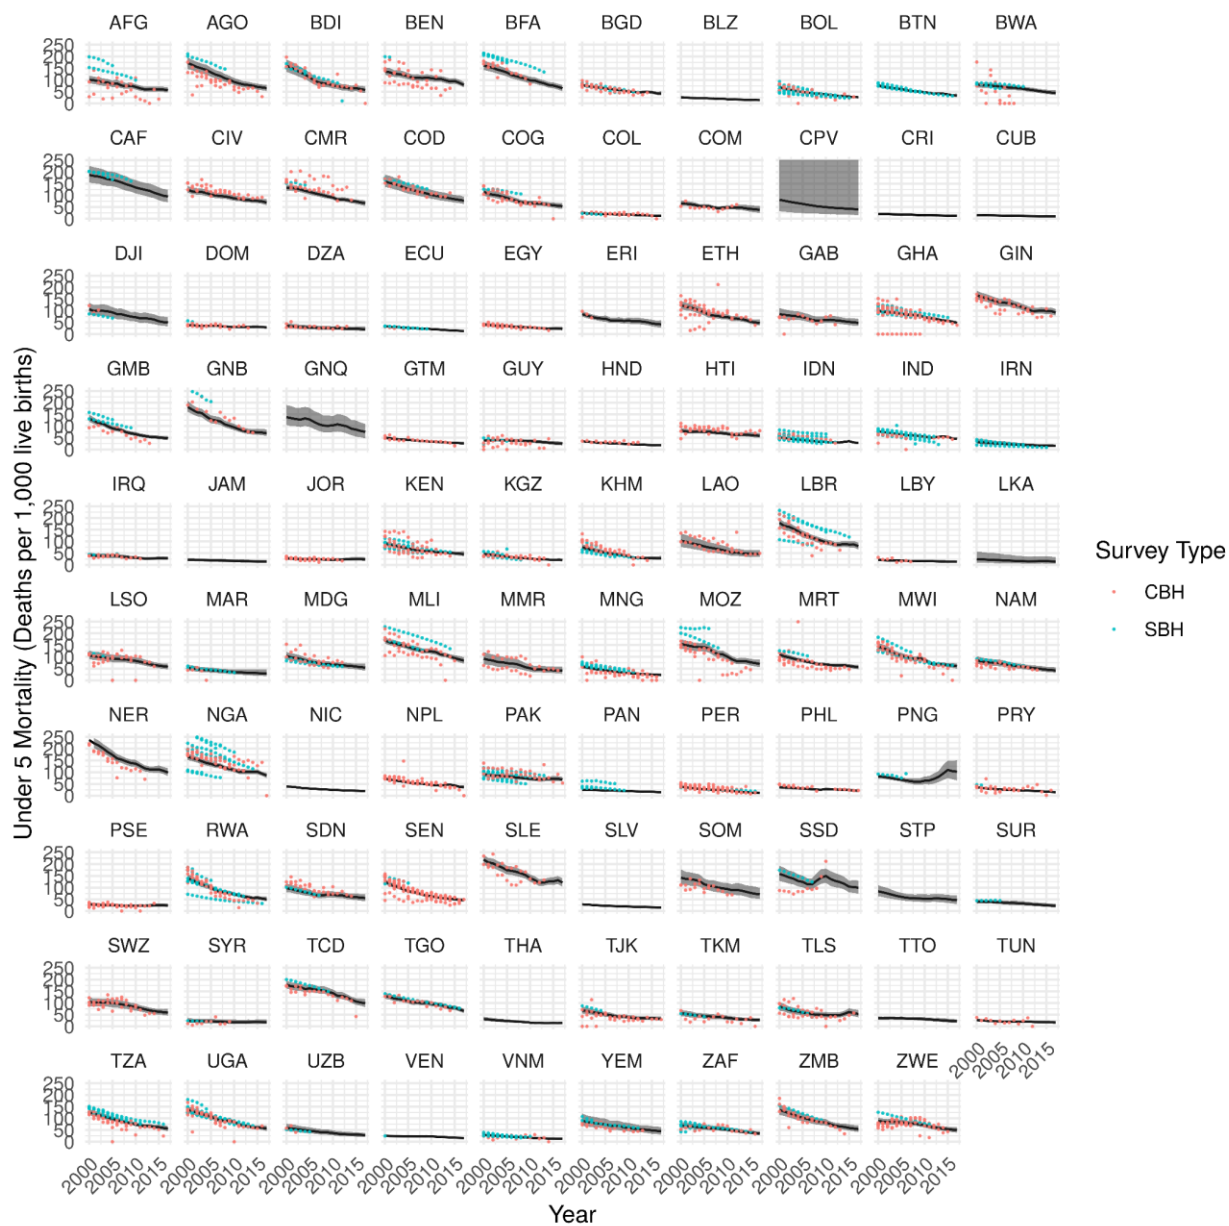

903  
 904  
 905

906 *Supplementary Figure 5.23: Raw data aggregates and estimated trends after calibration to GBD, under-5*  
 907 *mortality probability, 2000 to 2017*

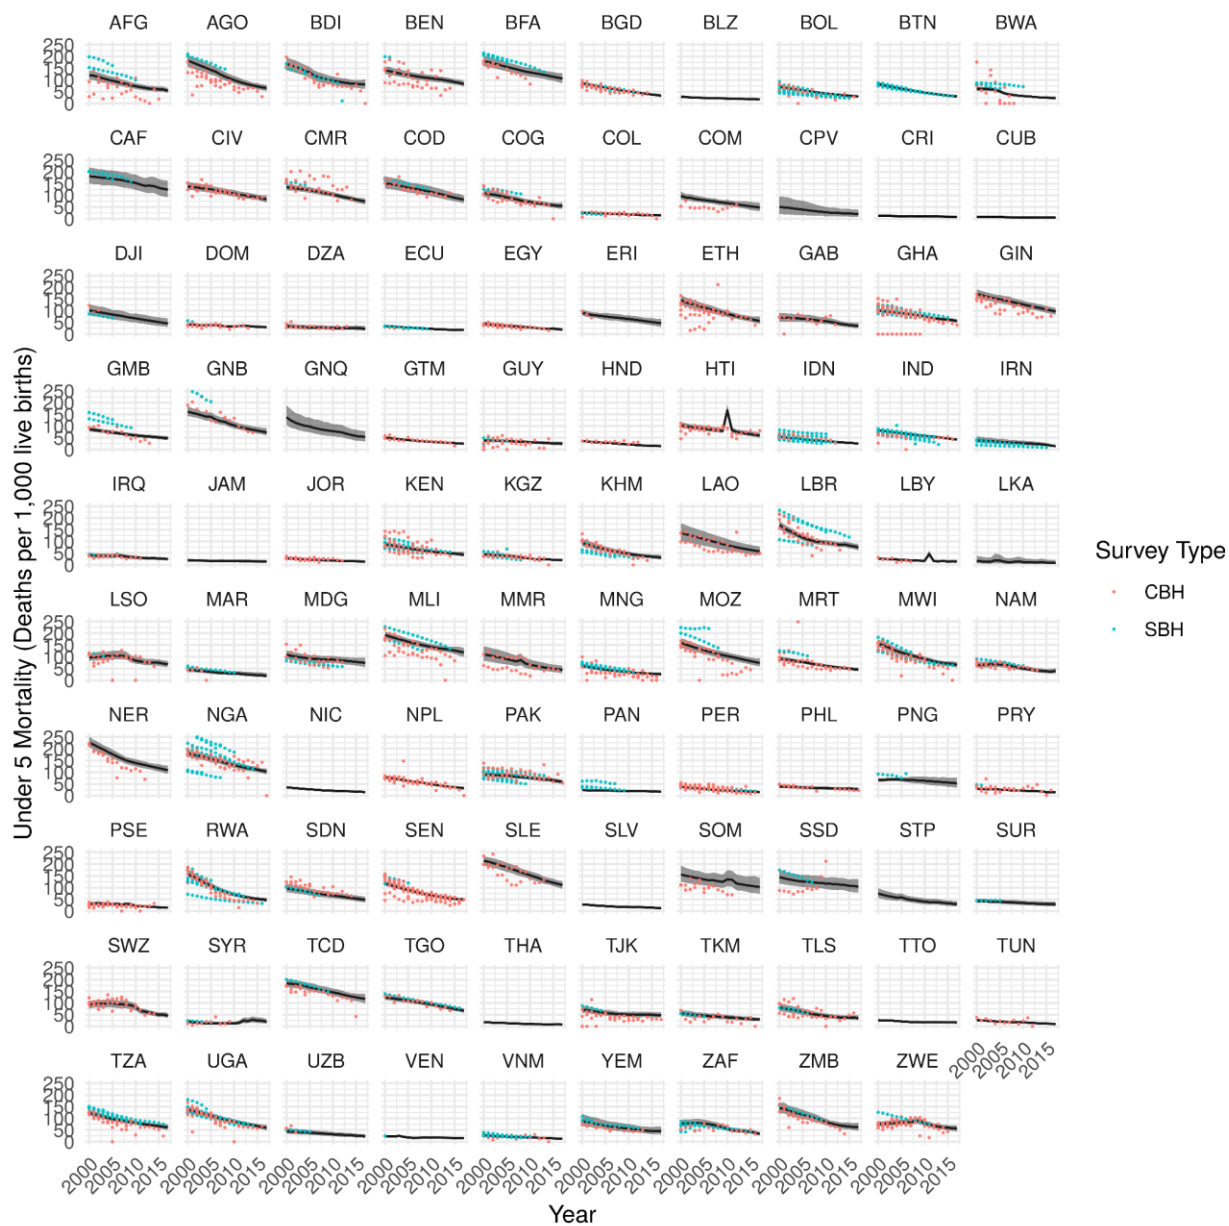

908

909

910

911 *Supplementary Figure 5.24: Raw data aggregates and estimated trends before calibration to GBD, infant*  
 912 *mortality probability, 2000 to 2017*

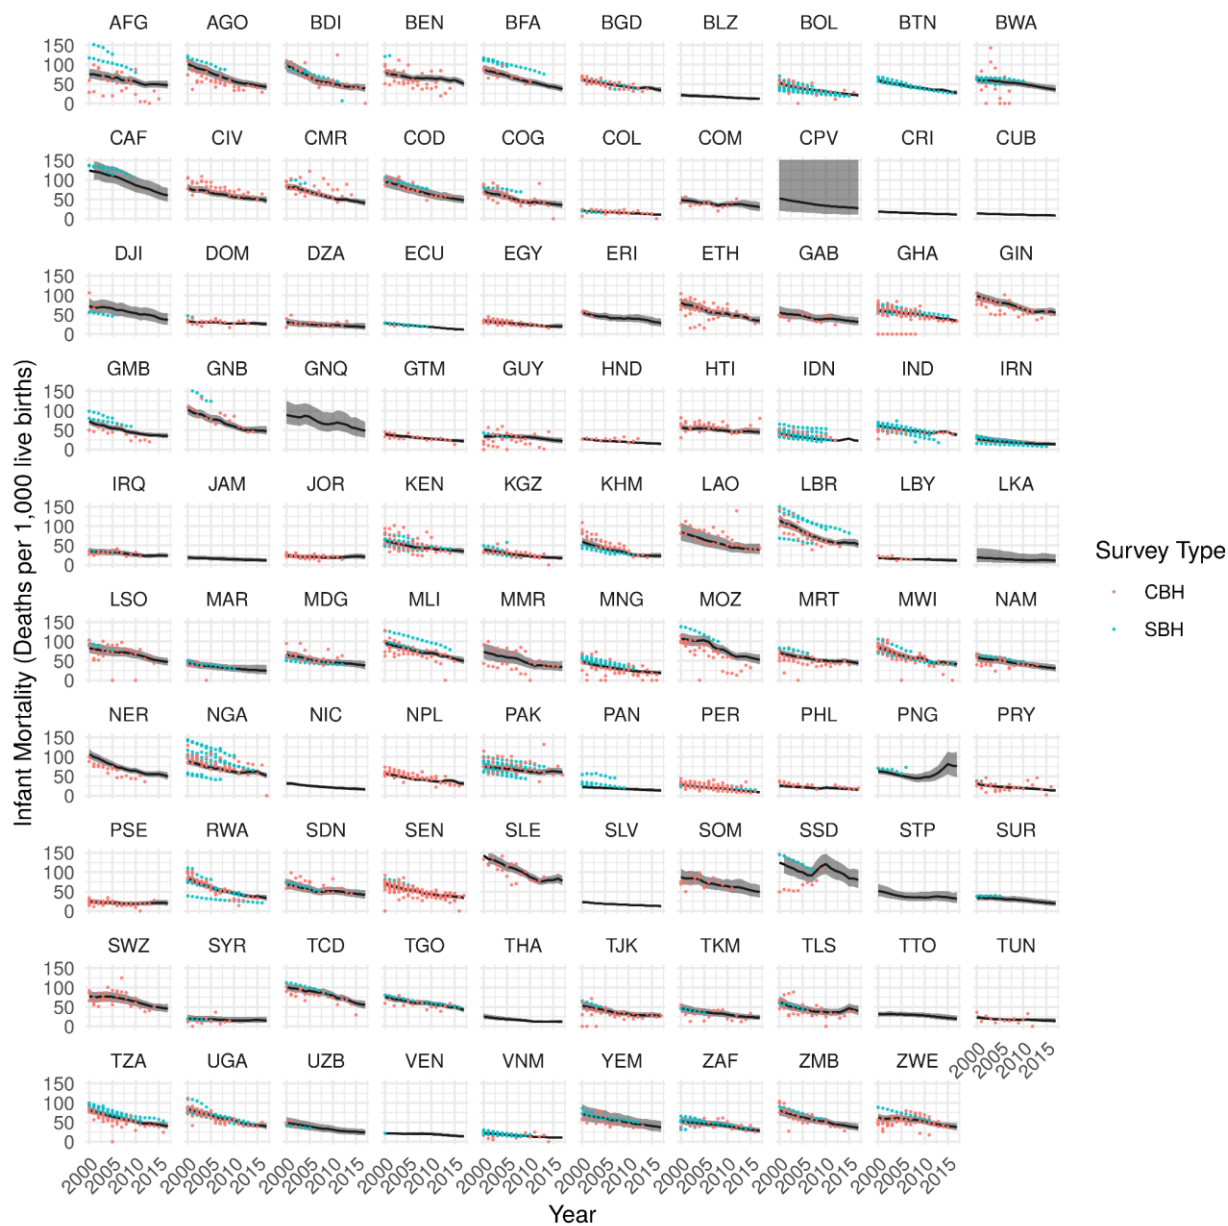

913

914

915



916 *Supplementary Figure 5.25: Raw data aggregates and estimated trends after calibration to GBD, infant*  
 917 *mortality probability, 2000 to 2017*

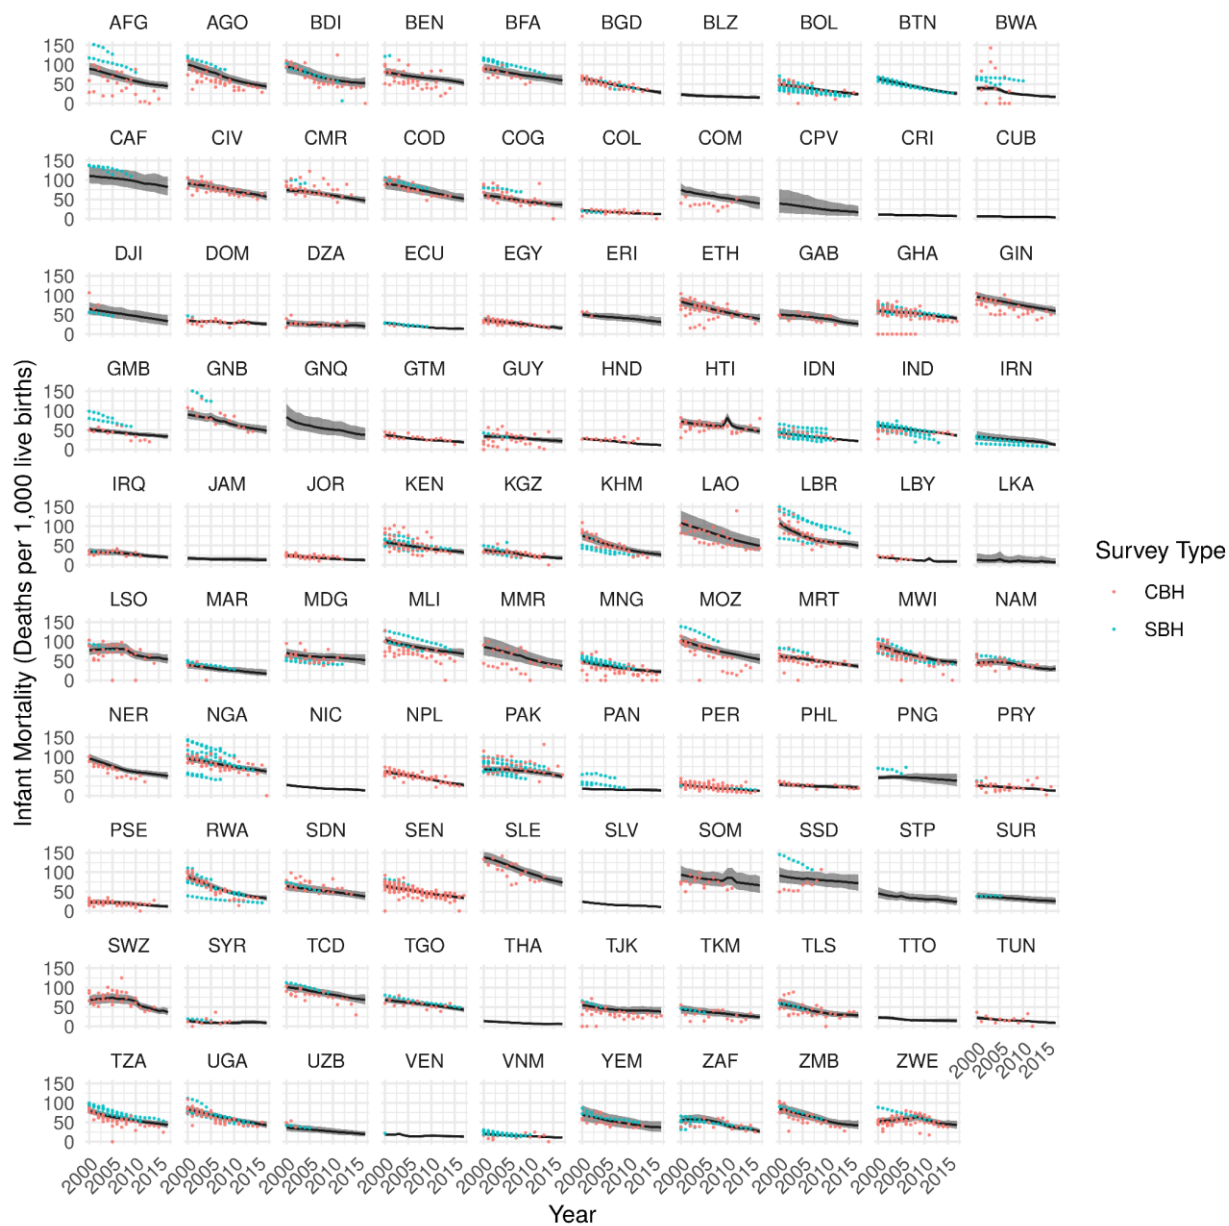

918

919



920 *Supplementary Figure 5.26: Raw data aggregates and estimated trends before calibration to GBD,*  
 921 *neonatal mortality probability, 2000 to 2017*

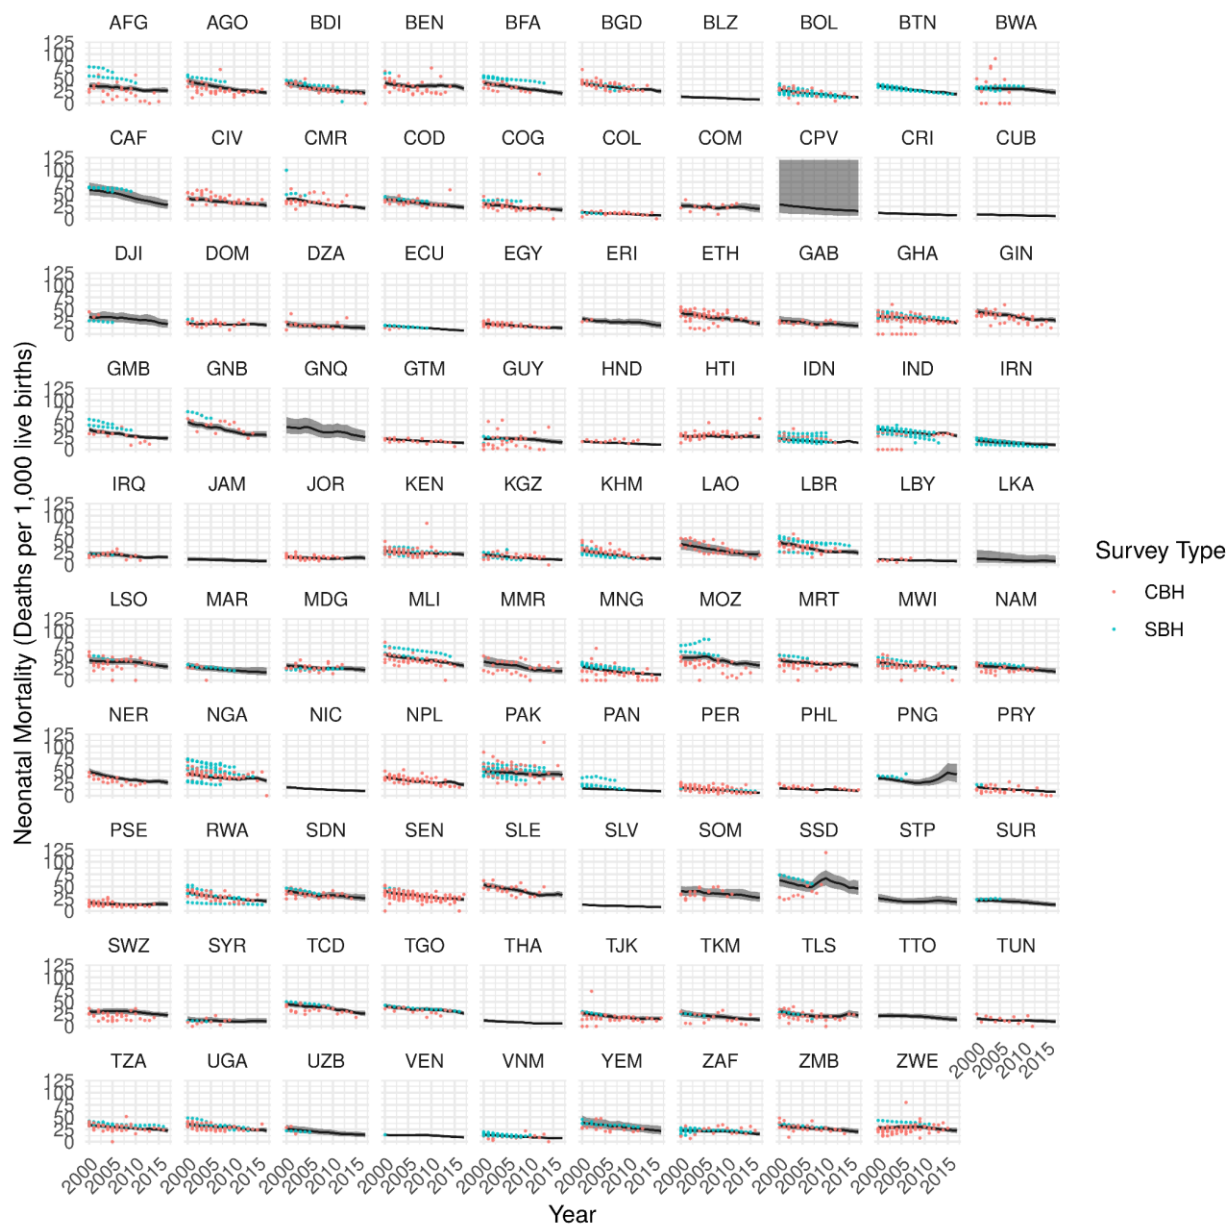

922

923

Supplementary Figure 5.27: Raw data aggregates and estimated trends after calibration to GBD, neonatal mortality probability, 2000 to 2017

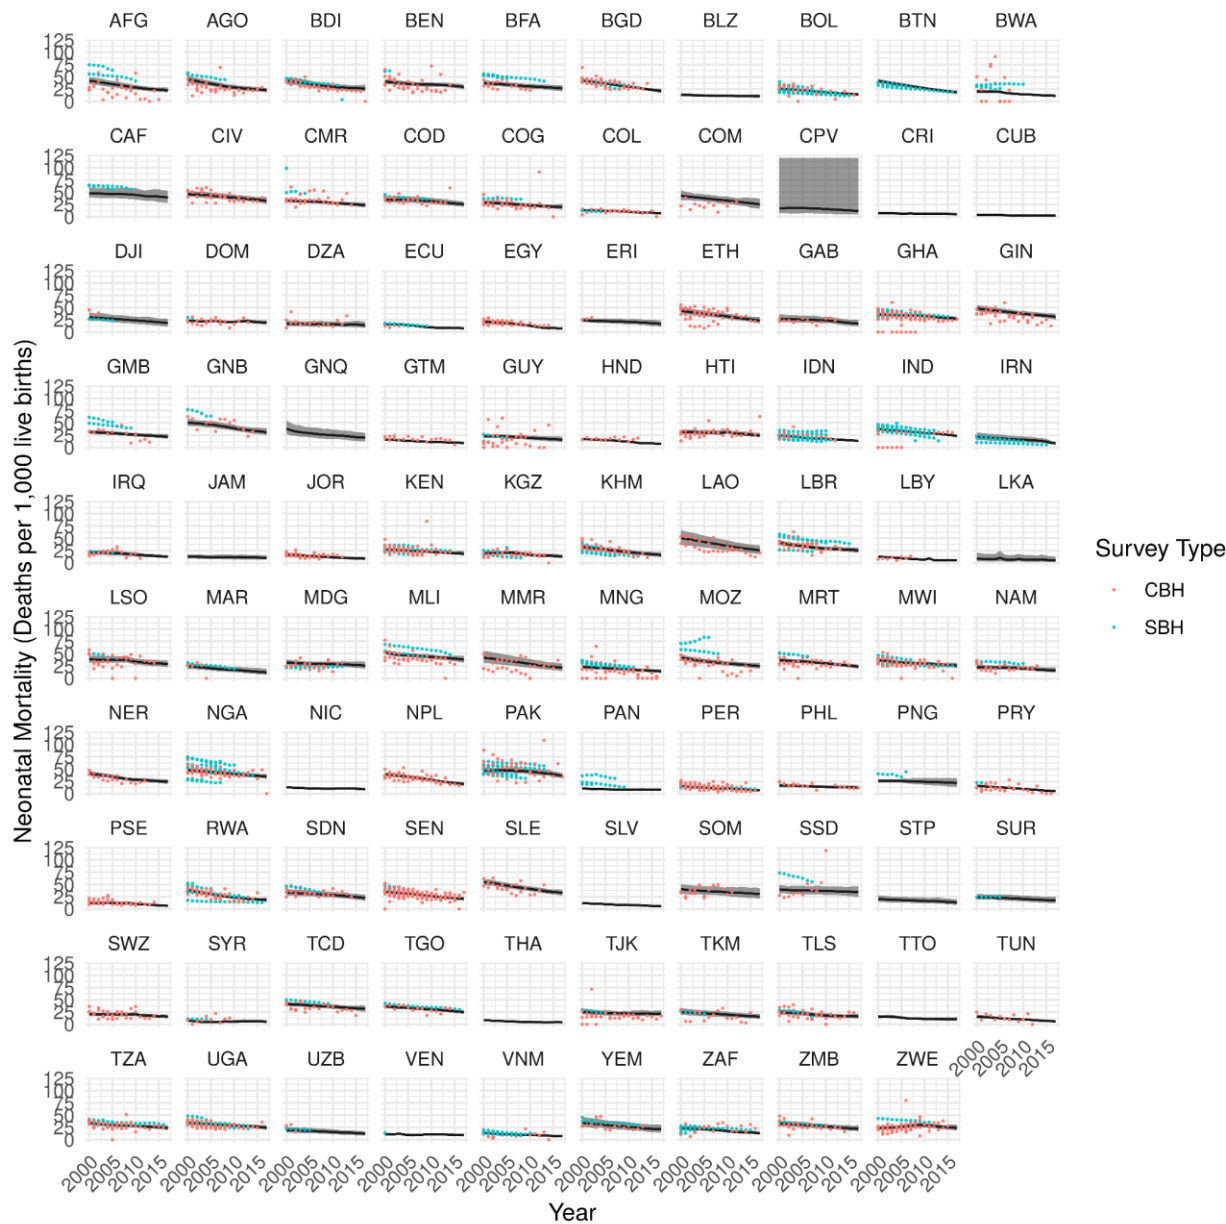

#### 5.4.4 Migration sensitivity analysis

All birth histories are associated with the location of the household of the mother at the time of survey or census. Since birth histories are used to construct retrospective mortality trends in specific locations, it is possible that life and mortality experiences are being counted in places where they did not occur. Unfortunately, many of the data sources we rely on do not ask about migration history. We undertook a sensitivity analysis to better understand how this could be affecting our results.

We conducted a focused sensitivity analysis on six countries with varying levels of internal migration<sup>31</sup> and available complete birth history survey data conducted since 2002 with migration questions to draw from. These were Bangladesh (BGD), Kenya (KEN), Nepal (NPL), Peru (PER), Tanzania (TZA), and Uganda (UGA). In BGD, 2 of the 4 surveys checked asked a usable migration question. In KEN 2 of 5 did; in NPL 2 of 5; in PER 8 of 8; in TZA 3 of 5; and in UGA 2 of 4.

Using questions asking about how long the mothers lived continually at their current residence, we first assessed the rates of retrospective attrition in each country. In Bangladesh, Nepal, and Peru, around 90% of mothers surveyed had been in their current residence for the past five years. In Kenya, Uganda, and Tanzania, five-year relocation rate was closer to 80%. In the 2016 Peru DHS, we found nearly 60% relocation rate going back to 2000. It is important to note that as years since survey increase, the proportion of data contribution to the model decreases. For example, in the case of estimates from the 2016 Peru DHS, there have also been nine other surveys also contributing information for 2000. In the full global model dataset, about 50% of the total retrospective data come from surveys/censuses that were collected within the past five years.

National-level trends are not sensitive to the assumption of including children born in different locations. This assumption would cause problems if there are considerable differences in mortality between the movers and long-term stayers. Below are national-level aggregate trends of U5MR calculated from each of the surveys in the six example countries. The red trends represent the full dataset, as used in our model. The blue trends represent mortality rate trends calculated only from children who were born in the current residence. Differences are very minimal, meaning that any difference between the mortality experiences of children pre-migration and those born in current residence did not obviously bias results at this level of aggregation.

*Supplementary Figure 5.288: National-level trends, comparing estimates made using the full survey of respondents, versus keeping only those children born in current residence*

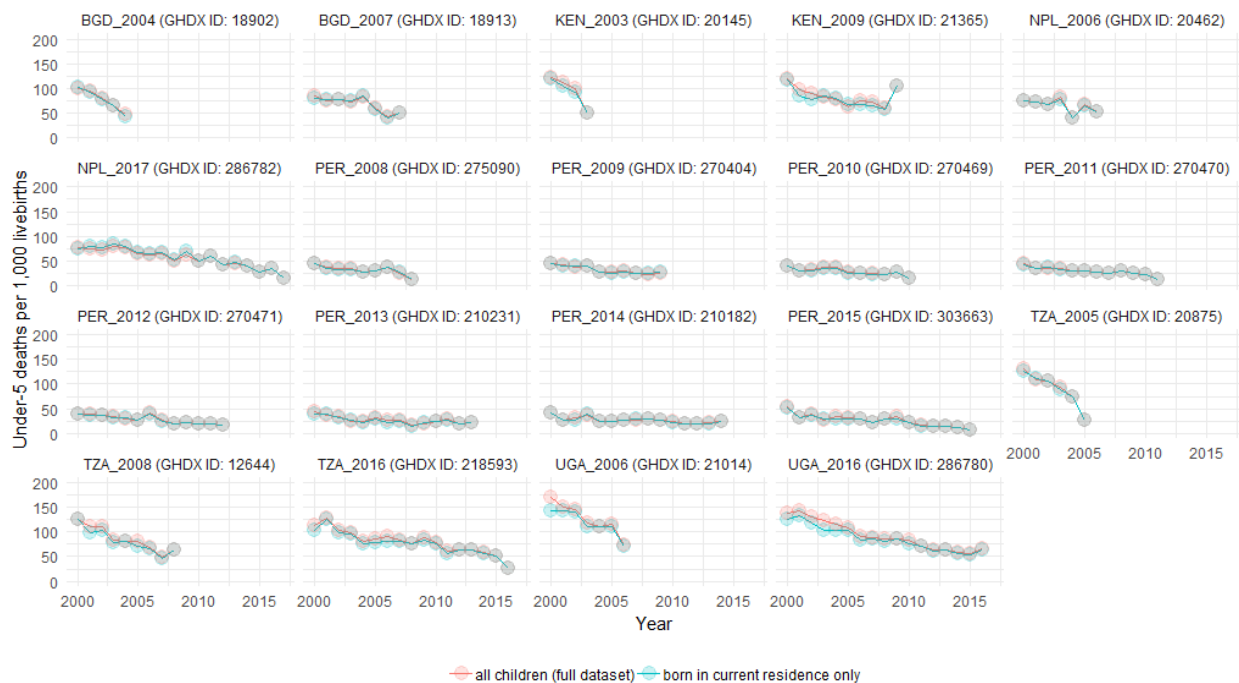

Of true interest, though, is how sensitive our subnational results are to this assumption. Using these same surveys, we fit our geospatial model for each country twice: once using the full dataset assembled of sources with a migration question, and once using the same surveys but keeping only keeping birth histories for children born in the current residence. These tests are somewhat conservative, because children of women who changed residences within the same village or neighborhood are excluded as well. The plots below compare our results for a select number of years for each country. The “sub” models only include the subset of non-movers, while the “full” model includes everyone. In order to minimize the number of plots here, we are only showing estimates from the last year of data availability for each country.

*Supplementary Figure 5.299: Map and scatterplot comparisons between full data and a subset of those who did not move, Bangladesh, 2007. Second administrative area R-squared for years 2000, 2010, and 2017 = 0.89, 0.96, 0.90.*

Ratio between 2019\_05\_25\_migration\_q\_full\_bgd and 2019\_05\_25\_migration\_q\_sub\_bgd: 2007

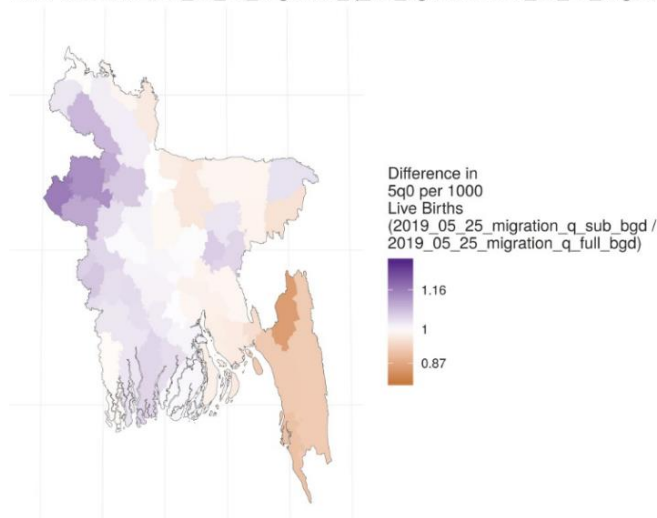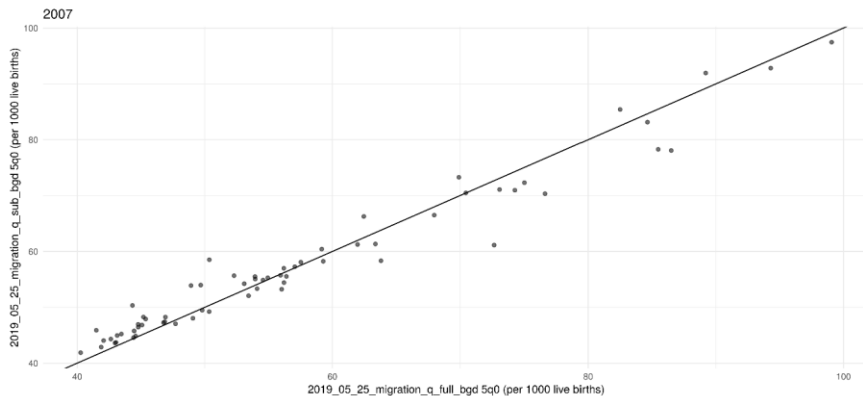

975

976 *Supplementary Figure 5.30: Map and scatterplot comparisons between full data and a subset of those*  
977 *who did not move, Kenya, 2009. Second administrative area R-squared for years 2000, 2010, and 2017 =*  
978 *0.75, 0.71, 0.65.*

Ratio between 2019\_05\_25\_migration\_q\_full\_ken and 2019\_05\_25\_migration\_q\_sub\_ken: 2009

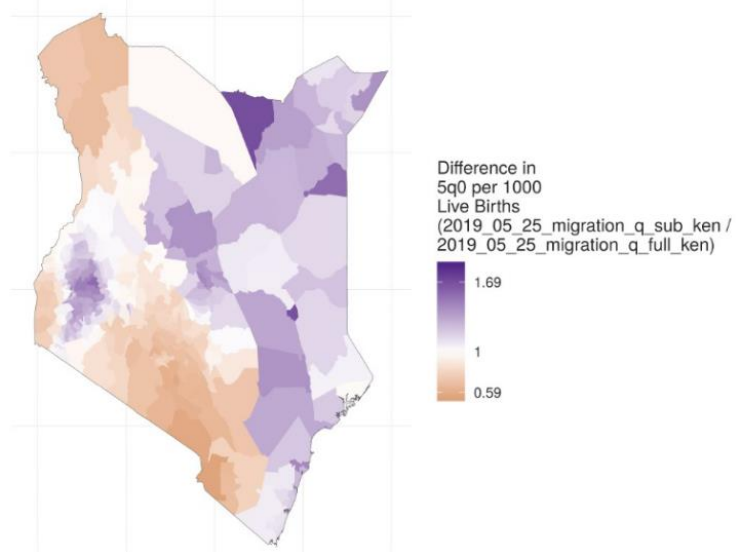

979

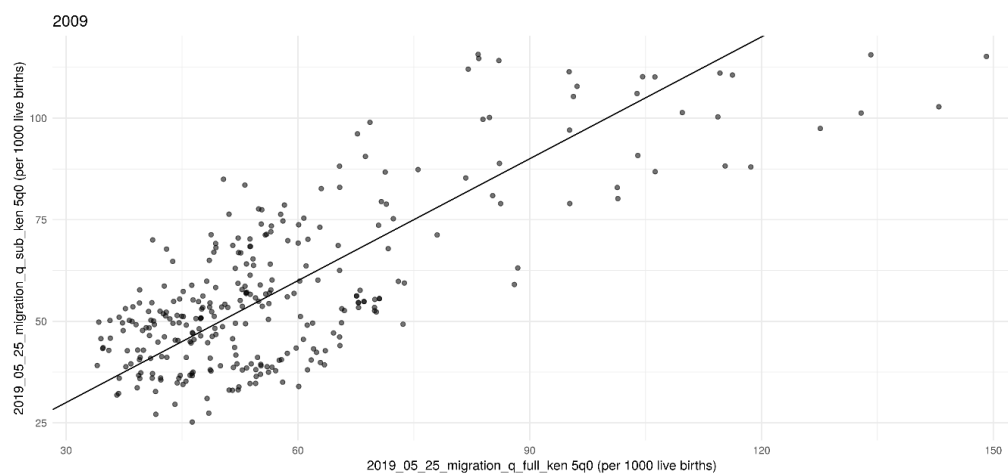

980

981

982

983

984 *Supplementary Figure 5.31: Map and scatterplot comparisons between full data and a subset of those*  
985 *who did not move, Nepal, 2017. Second administrative area R-squared for years 2000, 2010, and 2017 =*  
986 *0.99 for all years.*

Ratio between 2019\_05\_25\_migration\_q\_full\_npl and 2019\_05\_25\_migration\_q\_sub\_npl: 2017

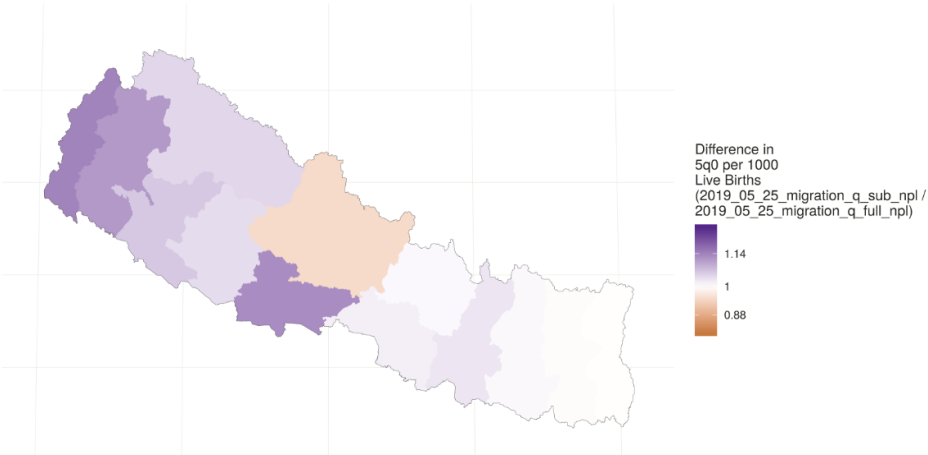

987

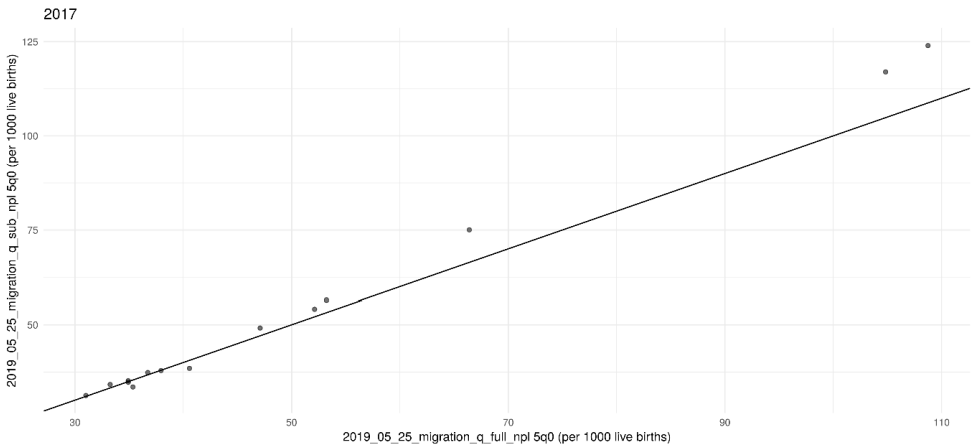

988

989

990 *Supplementary Figure 5.32: Map and scatterplot comparisons between full data and a subset of those*  
991 *who did not move, Peru, 2015. Second administrative area R-squared for years 2000, 2010, and 2017 =*  
992 *0.98, 0.98, 0.97.*

Ratio between 2019\_05\_25\_migration\_q\_full\_per and 2019\_05\_25\_migration\_q\_sub\_per: 2015

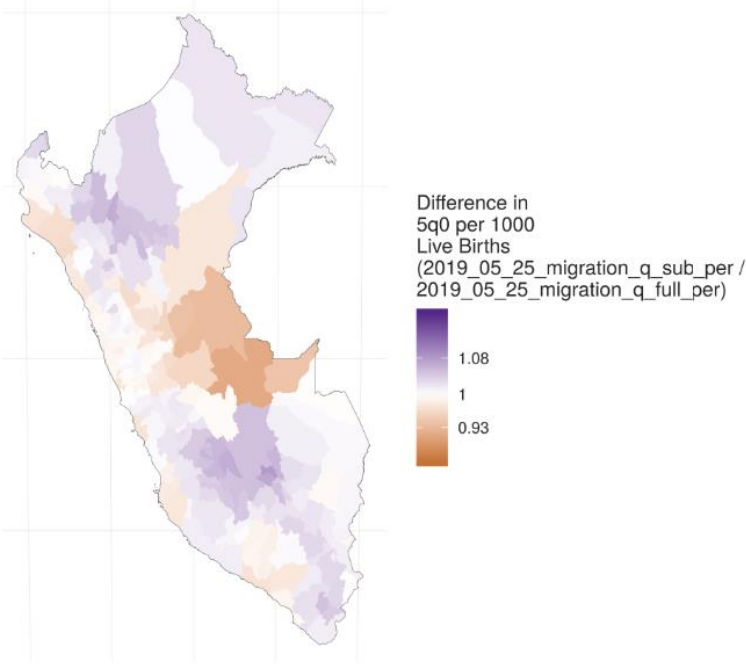

993

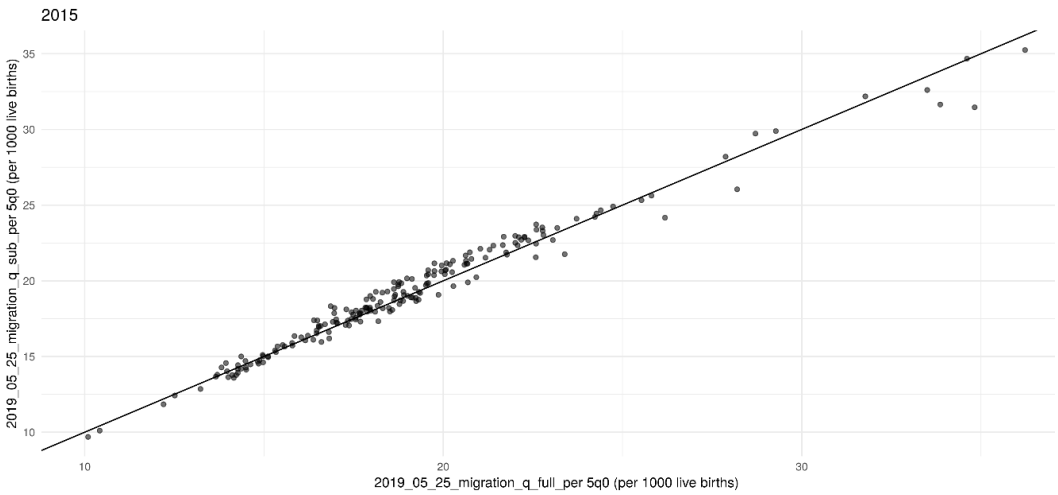

994

995

996 *Supplementary Figure 5.33: Map and scatterplot comparisons between full data and a subset of those*  
 997 *who did not move, Tanzania, 2008. Second administrative area R-squared for years 2000, 2010, and*  
 998 *2017 = 0.54, 0.58, 0.61.*

Ratio between 2019\_05\_25\_migration\_q\_full\_tza and 2019\_05\_25\_migration\_q\_sub\_tza: 2008

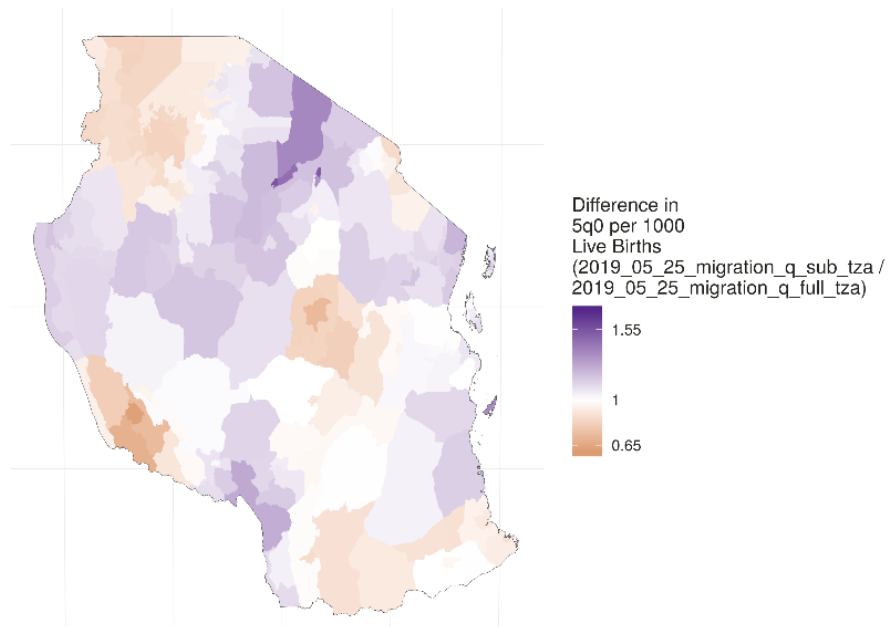

999

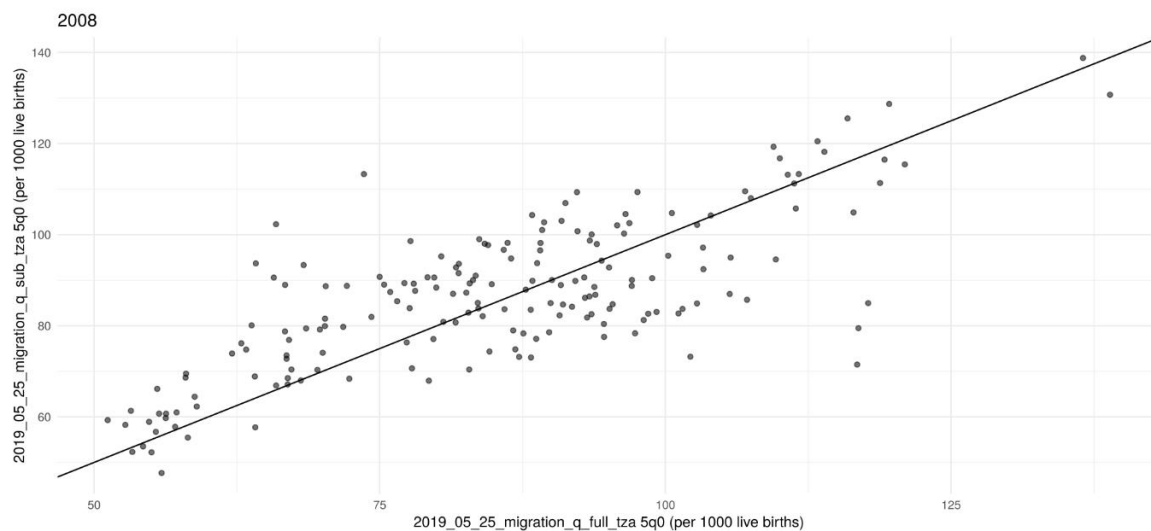

1000

1001



Supplementary Figure 5.34: Map and scatterplot comparisons between full data and a subset of those who did not move, Uganda, 2016. Second administrative area R-squared for years 2000, 2010, and 2017 = 0.58, 0.65, 0.64.

Ratio between 2019\_05\_25\_migration\_q\_full\_uga and 2019\_05\_25\_migration\_q\_sub\_uga: 2016

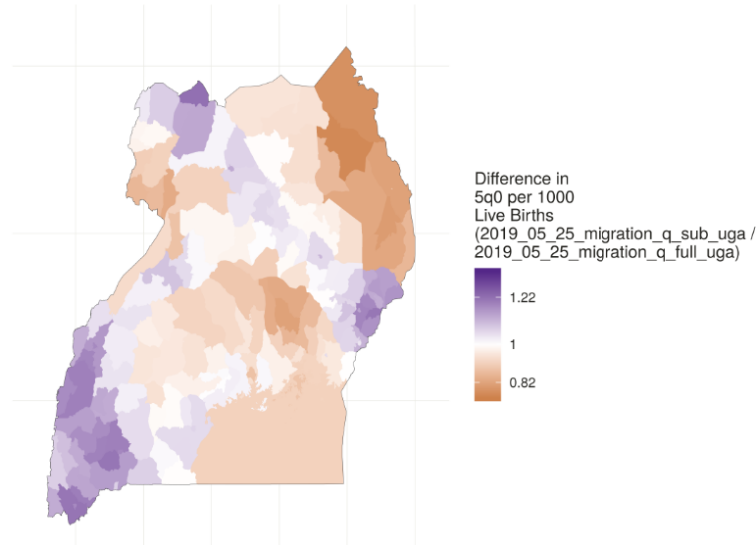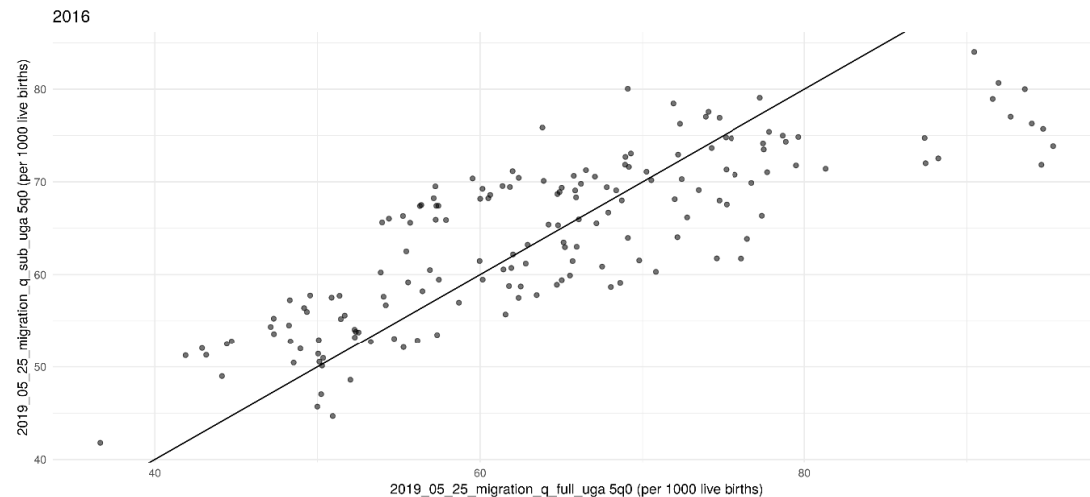

We ran a version of the full 99-country model only keeping retrospective data from only within five years since data collection. While we could not identify migrants in all data sources, this offered a simple way to potentially minimize retrospective attrition and test the sensitivity of our results. This again is a conservative test because we would expect that in most cases we would also drop the majority of children who have always resided where they were surveyed. In the plots below, we compare results from the full model run with all data (model run labelled as 2019\_06\_07\_rtr) and the model run with only up to five years' retrospective data kept from each source (labelled 2019\_06\_11\_migration\_5yr). In the interest of space, we limit the plots we show to 2000 and 2010 but can supply the reviewer with all years upon request. In all we show three pairs of plots, each for 2000 and 2010, respectively, showing comparison between the estimates from the two model runs: the first pair of maps show the relative difference, the next pair shows a scatterplot comparing the two runs, and finally the last pair of maps

1018 show where uncertainty intervals do not overlap. While there are some variations in the mean estimates  
1019 (maps), the overall tendency is for estimates to remain quite similar (scatterplots). Where differences do  
1020 remain, the vast majority are not significant (uncertainty intervals mostly remain overlapping, except for  
1021 a few districts in India and Bangladesh). As would be expected, the differences are larger going back in  
1022 time, since there is a larger difference in the input data further back in time.

1023

1024

1025

1026

*Supplementary Figure 5.35: Maps showing relative difference between the full model run and a run where only five years of retrospective data were kept from each data source for 2000 and 2017*

Ratio between 2019\_06\_07\_rtr and 2019\_06\_11\_migration\_5yr: 2000

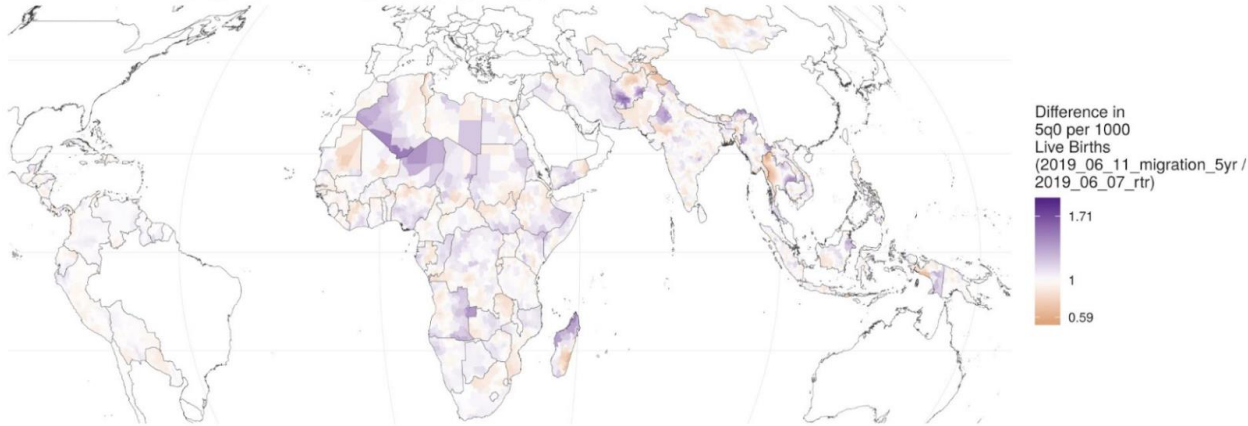

1027

Ratio between 2019\_06\_07\_rtr and 2019\_06\_11\_migration\_5yr: 2010

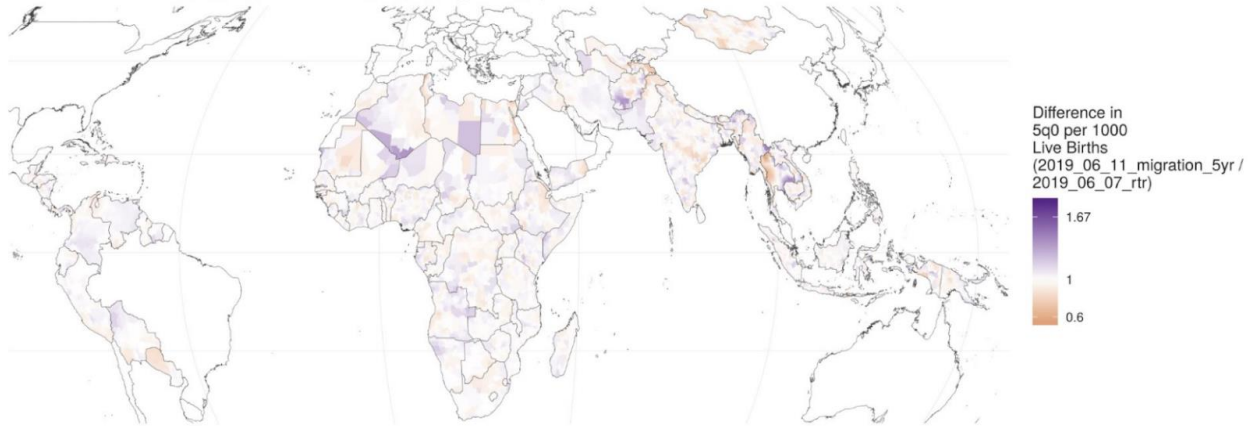

1028

1029

1030

1031

1032

1033

*Supplementary Figure 5.36: Scatterplots showing difference between the full model run and a run where only five years of retrospective data were kept from each data source for 2000 and 2017*

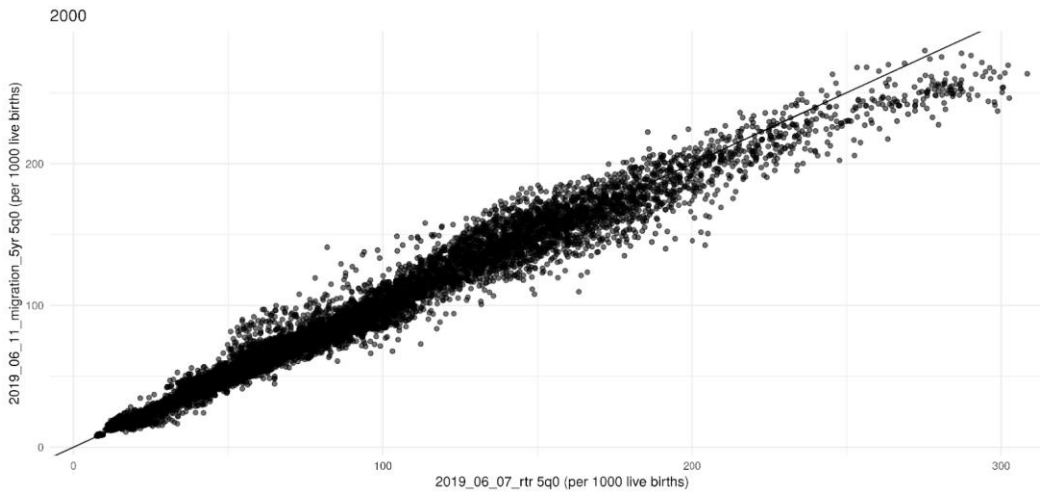

1034

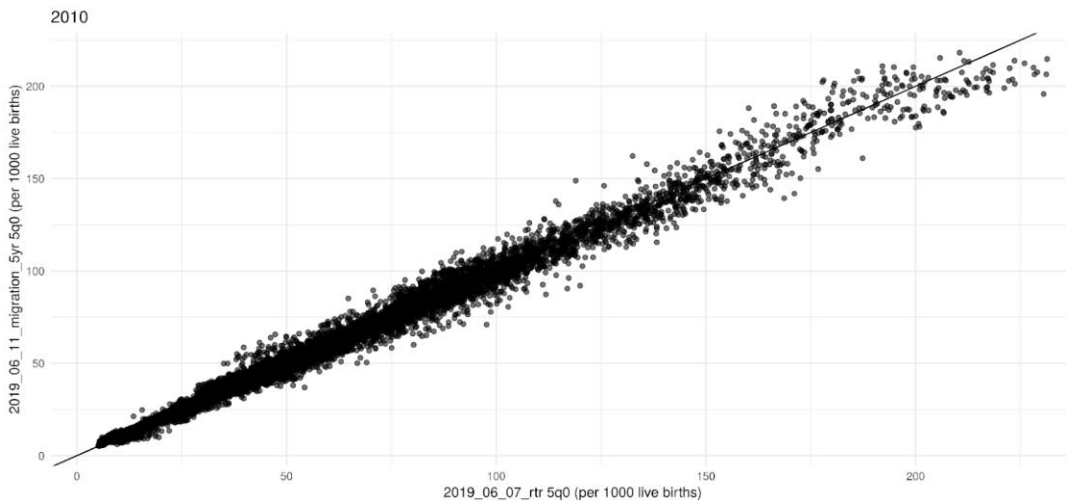

1035

1036

While migration is certainly a concern for subnational mapping of child mortality using survey and census data, our sensitivity analyses indicate that our estimates are generally robust to the assumptions we make, particularly since the tests we implemented here introduce biases which are likely greater than the effect of migration would be. In our deeper look at the six countries, we found that typically about half the available surveys ask a migration question with which to subset the sample; meaning that to use only a subset of non-movers would greatly reduce the number of data sources available to us.

#### 5.4.5 Sources of reductions in deaths

In the paper, we describe how total child deaths, even in high-risk areas, are declining. This is despite population growth and high fertility in those areas. This is happening because declining mortality rates are outpacing population growth to still net a decline in deaths. In this section we unpack these dynamics.

First, the geographic area under a high mortality risk regime is shrinking. The maps below illustrate this.

*Supplementary Figure 5.37: Maps for 2000 and 2017 indicating in green where the under-5 mortality probability was greater than 80 deaths per 1,000 live births*

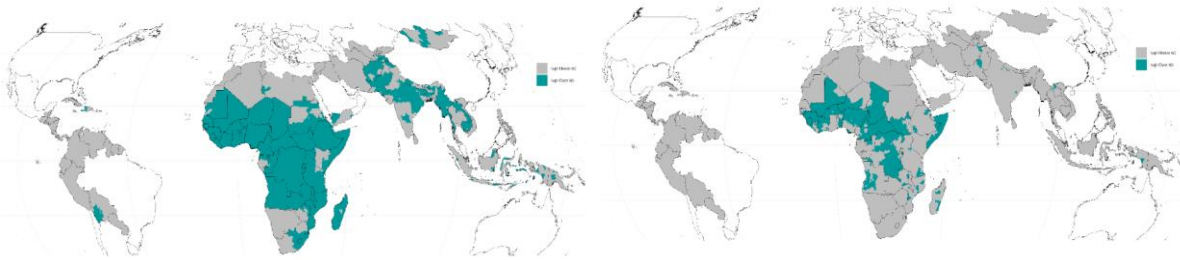

It is true that the total under-5 population in the study countries increased over the study period, from about 414 million in 2000 to 472 million in 2017, but as mortality risk declined, a greater share of that population is concentrated in lower mortality risk areas, as shown in the plot below of under-5 population distribution by U5MR for 2000 (red) and 2017 (blue).

*Supplementary Figure 5.38: Distribution of under-5 population in 2000 and 2017, plotted by under-5 mortality probability strata*

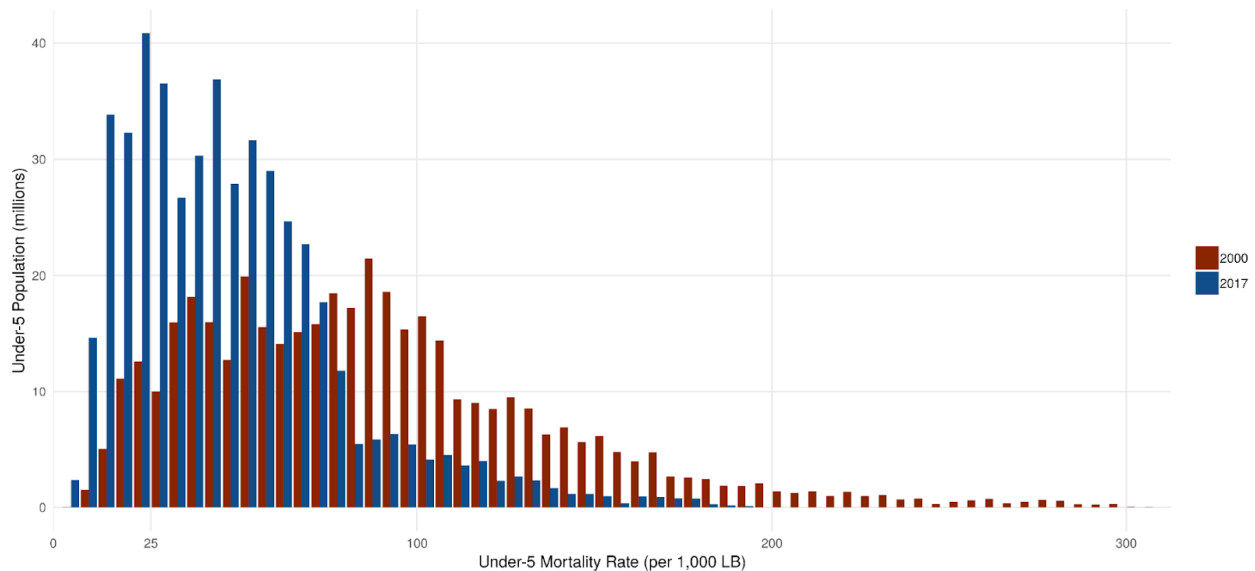

1062

1063 To better understand the contributions of mortality rate decline versus population change, we  
 1064 decomposed the change in deaths over time. In the plot below, we show the number of deaths by  
 1065 mortality risk strata in 2000 (band of 10 deaths per 1,000 live births). The blue line shows deaths in  
 1066 2000, the red line shows how many deaths we would expect in those same areas (based on 2000 risk  
 1067 strata) in 2017 if the mortality rate had not changed but if the under-5 population had changed. The  
 1068 orange line shows the observed number of deaths in those same areas. Population increase counteracts  
 1069 the declines attributable to lower mortality rates. In other words, if the population increased  
 1070 substantially, the mortality rate would need to decrease even more for the number of deaths to  
 1071 decrease.

1072 Increased deaths attributable to population growth are far greater in areas that were high-risk in 2000,  
 1073 meaning the decline in total deaths tends to be lower the higher the 2000 mortality risk was (particularly  
 1074 at the extreme end where U5MR>150). At the very low end (U5MR<25), we see instances where  
 1075 population change (decline in this case) contributed to a reduction in deaths. Overall, this plot shows  
 1076 that mortality rate declines outpace growth in the number of births, leading to fewer deaths overall.

1077

1078 *Supplementary Figure 5.39: Arrow plot showing the counteracting forces of population change and*  
 1079 *mortality rate decline on total number of births. Plotted along an axis of mortality rate strata (bins of 10*  
 1080 *per 1,000 livebirths) in 2000.*

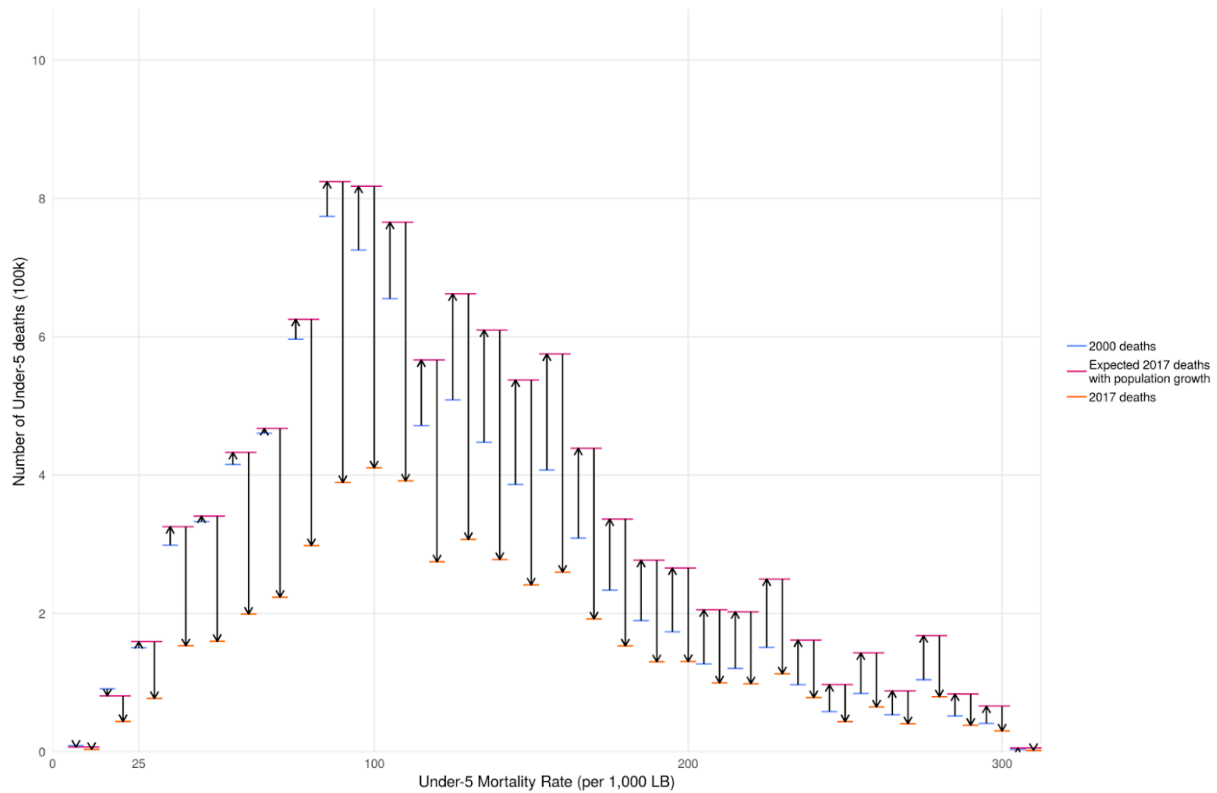

1081

1082

1083 These dynamics can be seen in greater detail in maps. The first map below shows the absolute  
 1084 difference between deaths in 2000 (as indicated by the blue bar of the above graph) and deaths  
 1085 expected in 2017 in 100,000 deaths at the second administrative level, given population growth and  
 1086 holding U5MR constant (as indicated by the red bar of the above graph). We see large expected  
 1087 increases in most places based on the growing number of births:

1088 *Supplementary Figure 5.40: Map indicating the expected growth in deaths from 2000 to 2017 based on*  
 1089 *population alone (holding 2000 mortality rate constant)*

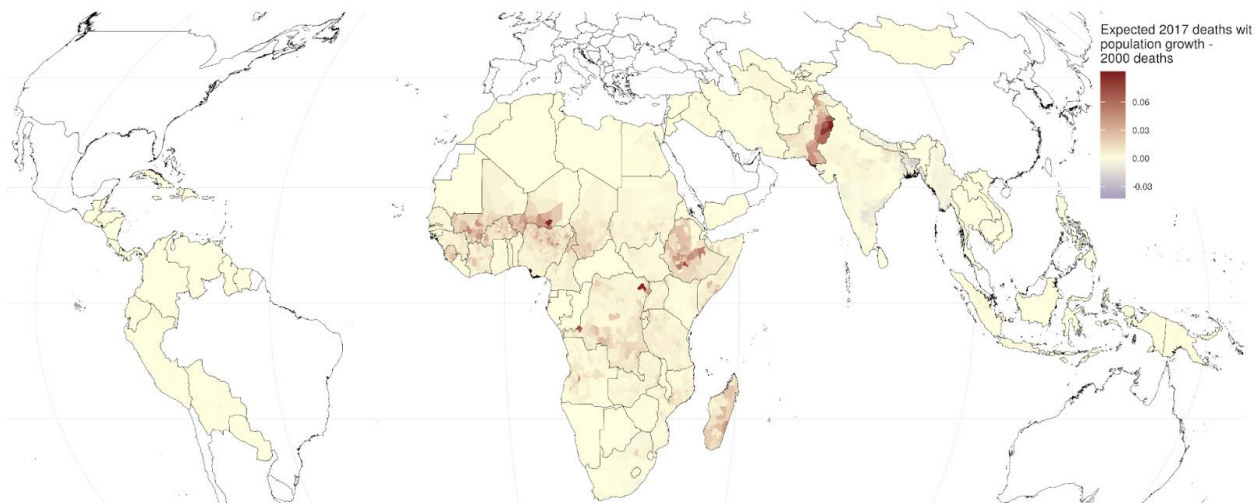

1090

The next map shows the difference between that expected counterfactual in 2017 (2017 population with 2000 rate, as indicated by the red bar from the arrow diagram above), with the observed deaths in 2017 (as indicated by the orange bar from the arrow diagram above). Note that again the legend is in 100,000s of deaths, and the scale has changed significantly. The magnitude of these declines is generally much greater than the increases seen in the map above.

*Supplementary Figure 5.41: Map indicating the difference between number of deaths in 2017 and the number expected based on population change alone*

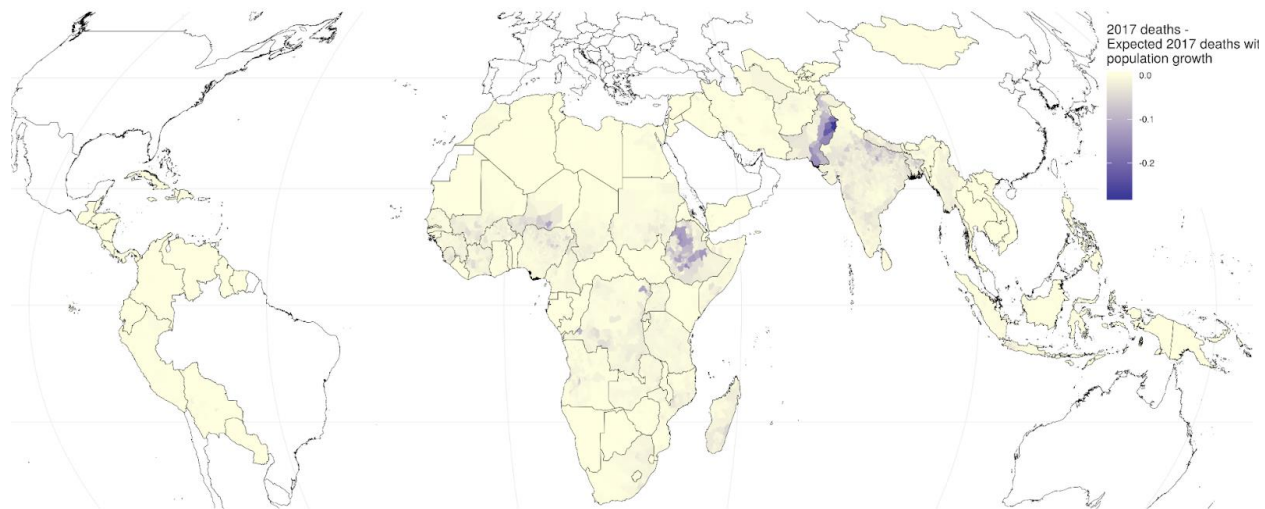

#### 5.4.6 Incorporating uncertainty into estimates of progress

Because all estimates listed in the manuscript are based on samples from a posterior predictive distribution, or “draws”, we are able to incorporate uncertainty into our estimates of mortality decline. We defined mortality as significantly decreasing over the time period 2000-2017 if the 95% uncertainty intervals for the estimated mortality in an area (defined as the 2.5<sup>th</sup> and 97.5<sup>th</sup> quantiles of the sample distribution) were non-overlapping between 2000 and 2017. Using this criterion, we estimated that 60.3% of second-level administrative units had experienced significant declines in mortality between 2000 and 2017. This differs from an analysis examining changes in the mean estimate for mortality across the time period; if we define an improvement in U5M as a reduction in the mean estimate between 2000 and 2017, then 99.8% of second-level administrative units improved during this time period.

We are also able to incorporate draw-level uncertainty to check whether an area has passed a mortality threshold with varying levels of confidence. In our analysis, when assessing whether a second-level administrative unit has met the SDG 3.2 target of less than 25 child deaths per 1,000 live births, we choose a confidence level of 90%. This means that we only consider a unit to have met the SDG 3.2 target if 90% of its draws fall below the threshold of 25 per 1,000. Using this criterion, we found that 32% of units had met the SDG 3.2 target for under-5 mortality in 2017. This differs from an analysis that



1118 assesses only whether the mean estimate for U5M is below the SDG 3.2 target; if only the mean  
1119 estimate is considered, then 49% of units have met the target in 2017.

1120

## 1121 6 Additional results

1122

1123 In this section we provide additional figures of interest that did not make it into the main manuscript or  
1124 extended data figures.

1125 Furthermore, a fully interactive visualization covering all results at the grid cell and administrative  
1126 subdivisions discussed in this paper is available at: <https://vizhub.healthdata.org/lbd/under5>. Using the  
1127 interactive tool, you may view annual estimates for neonatal, infant, and under-5 mortality rates and  
1128 death counts at the grid-cell level, first administrative level, second administrative level, and country  
1129 level. The tool includes mean and uncertainty intervals for all estimates at all levels.

1130 *Supplementary Figure 6.1: Second administrative subdivisions with a significant decline in neonatal mortality probability between 2000 and 2017*

1131 Significant is defined as non-overlapping 95% uncertainty intervals in 2000 and 2017.

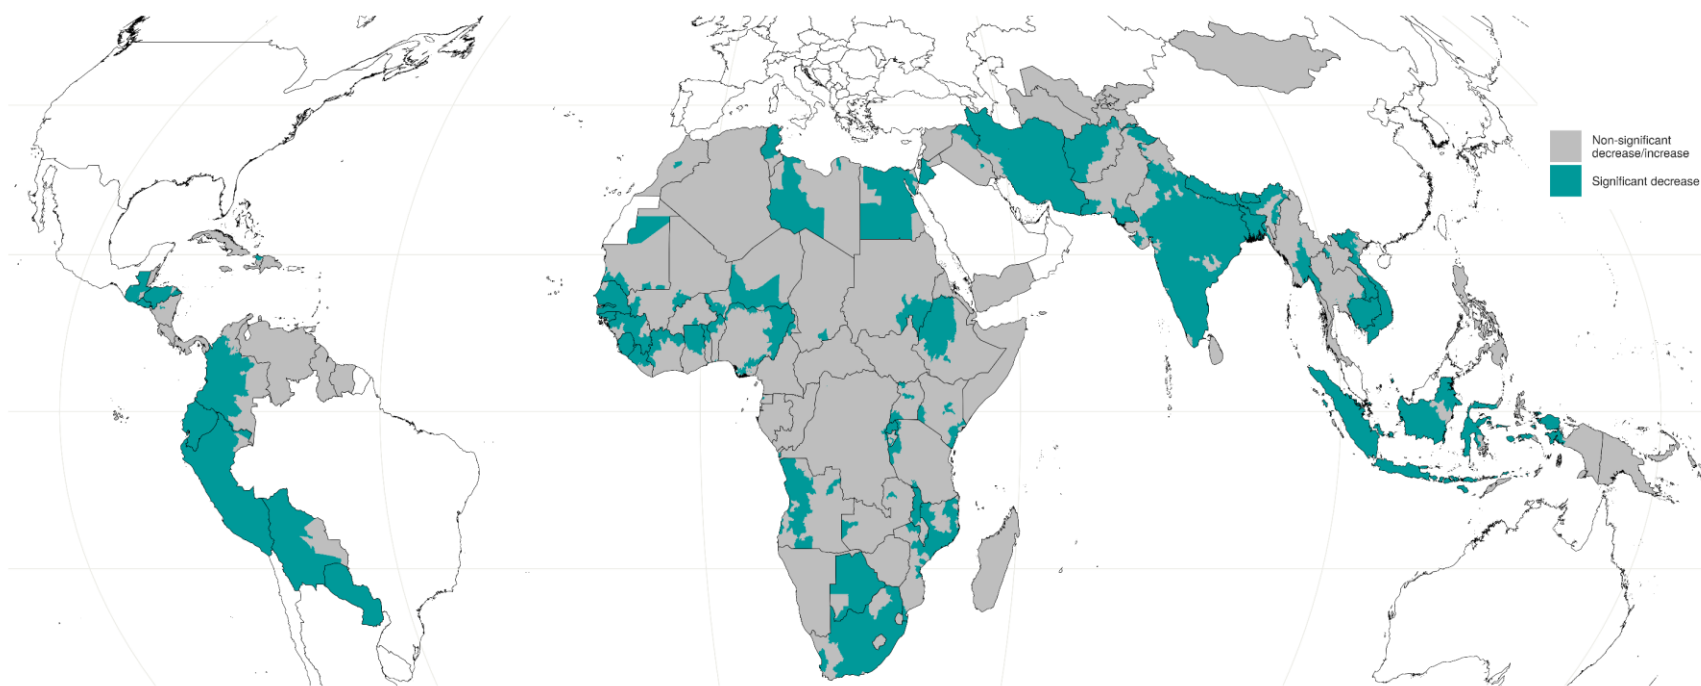

1132

1133

1134 *Supplementary Figure 6.2: Second administrative subdivisions with a significant decline in infant mortality probability between 2000 and 2017*

1135 Significant is defined as non-overlapping 95% uncertainty intervals in 2000 and 2017.

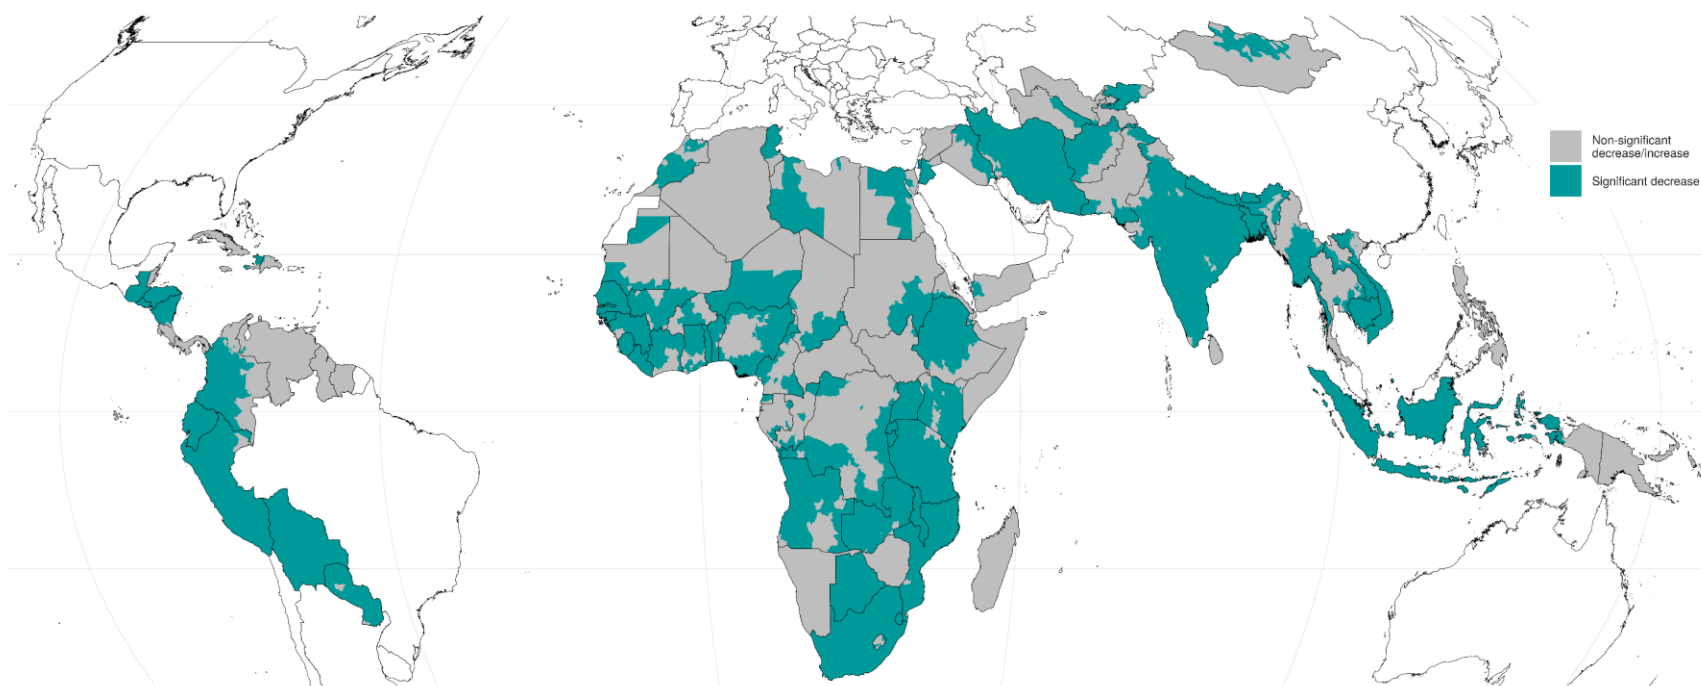

1136

1137

1138 *Supplementary Figure 6.3: Second administrative subdivisions with a significant decline in under-5 mortality probability between 2000 and 2017*

1139 Significant is defined as non-overlapping 95% uncertainty intervals in 2000 and 2017.

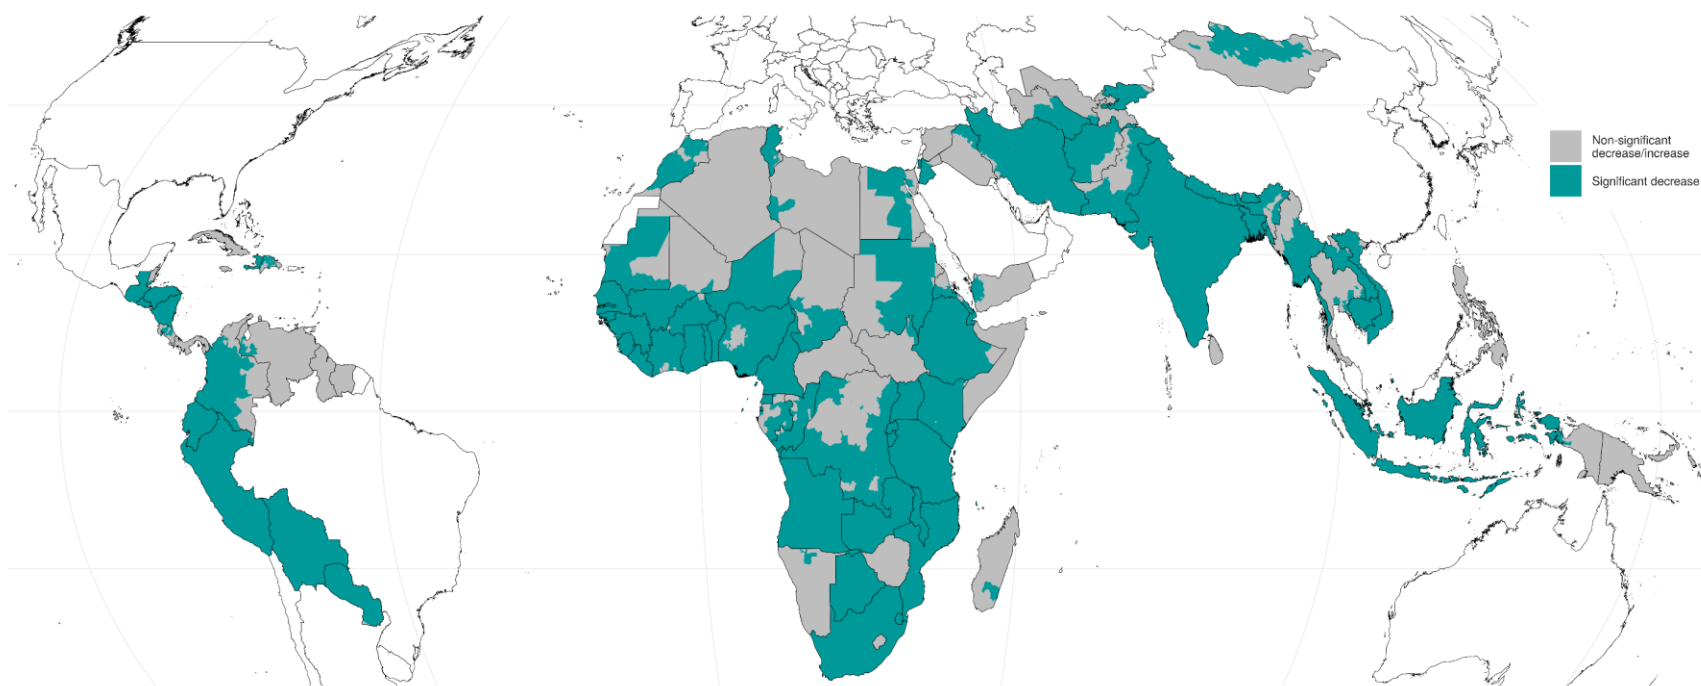

1140

1141

1142 *Supplementary Figure 6.4: Percentage of under-5 deaths in each bin of under-5 mortality probability that occur in the indicated world regions*

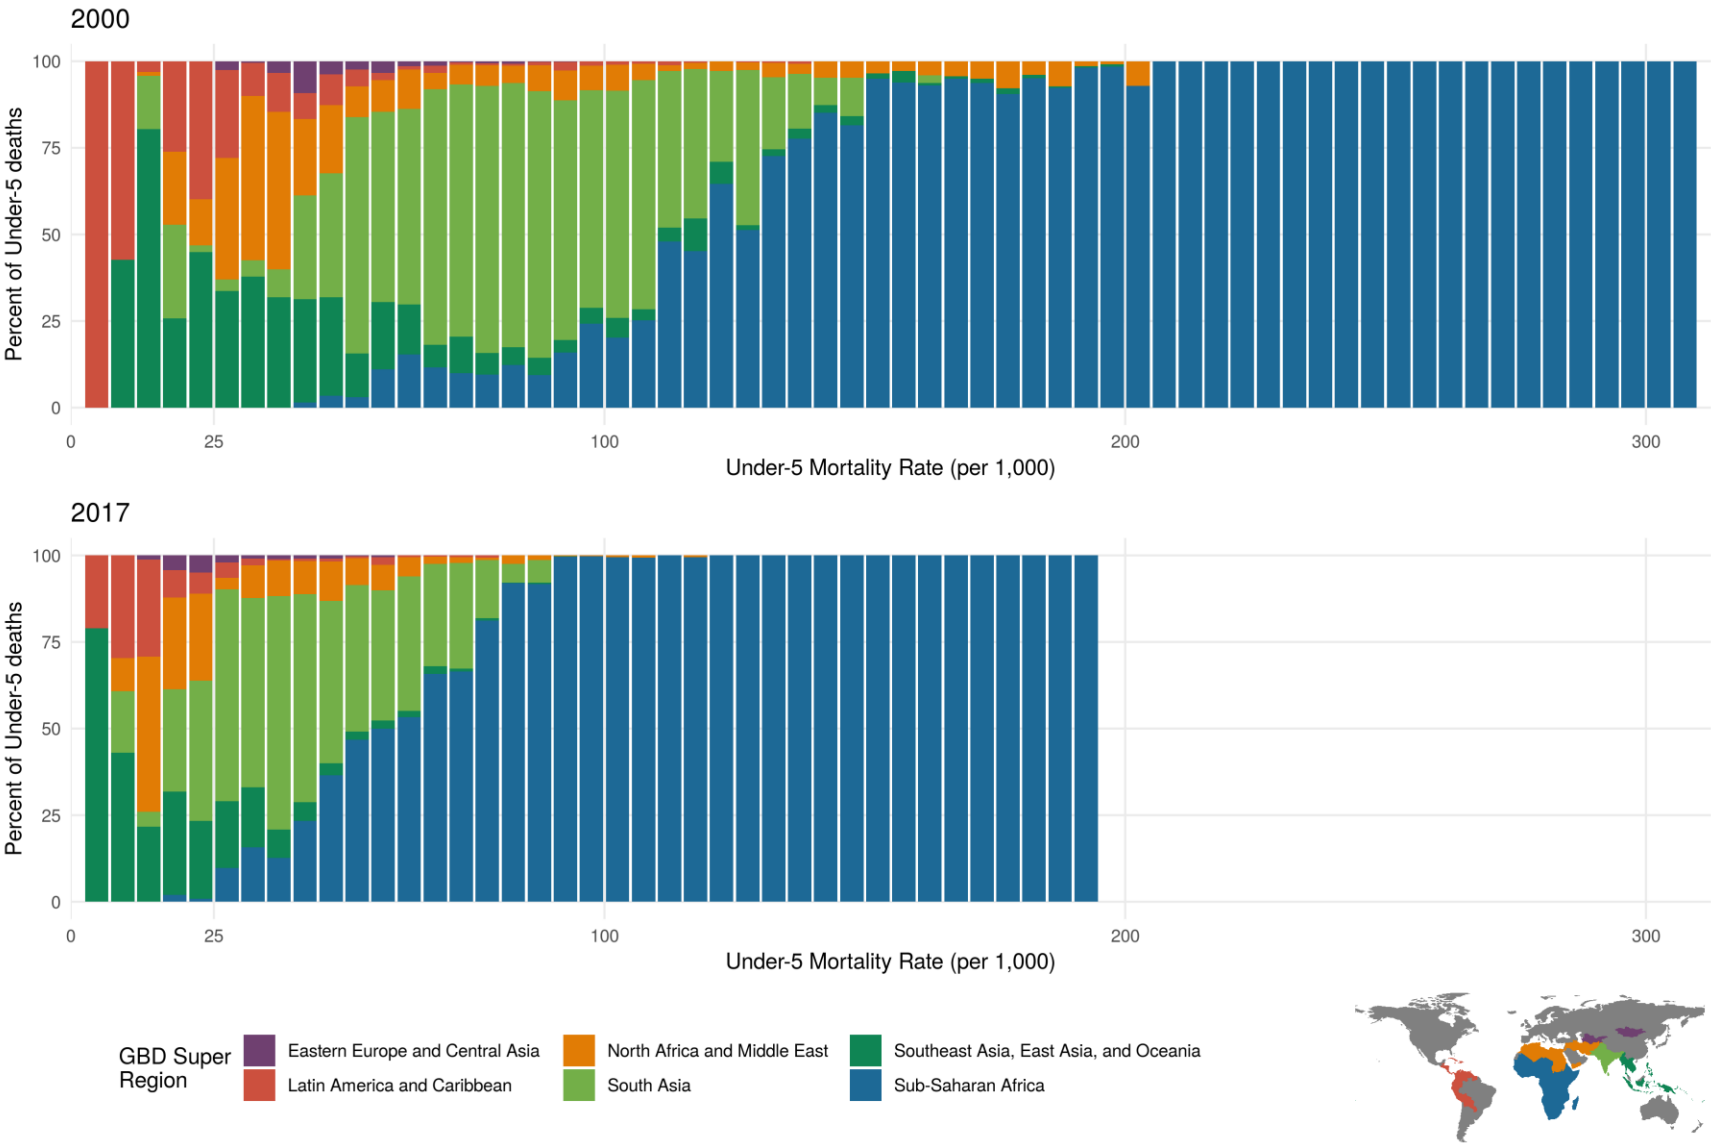

1143

1144 *Supplementary Figure 6.5: Posterior probability of having met the SDG 3.2 target of 12 deaths per 1,000 live births for neonatal mortality*  
1145 *probability in 2017*

1146 Note: mapped at the second administrative subdivision level.

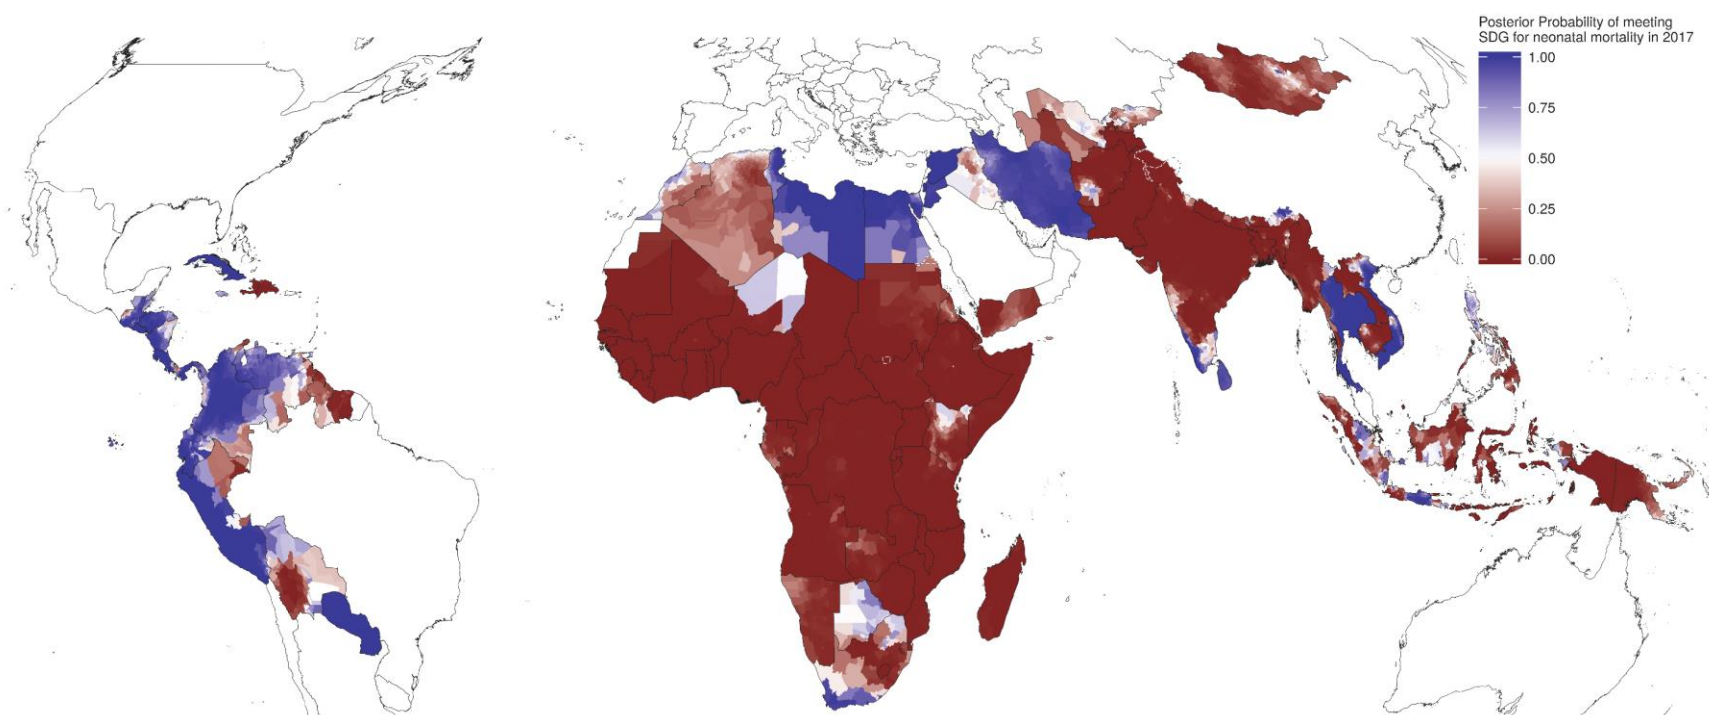

1147

1148

1149 *Supplementary Figure 6.6: Under-5 mortality probability by second administrative subdivision projected to 2030*

1150 Simple projections were used based on the rate of change in the estimates from 2000 to 2017.

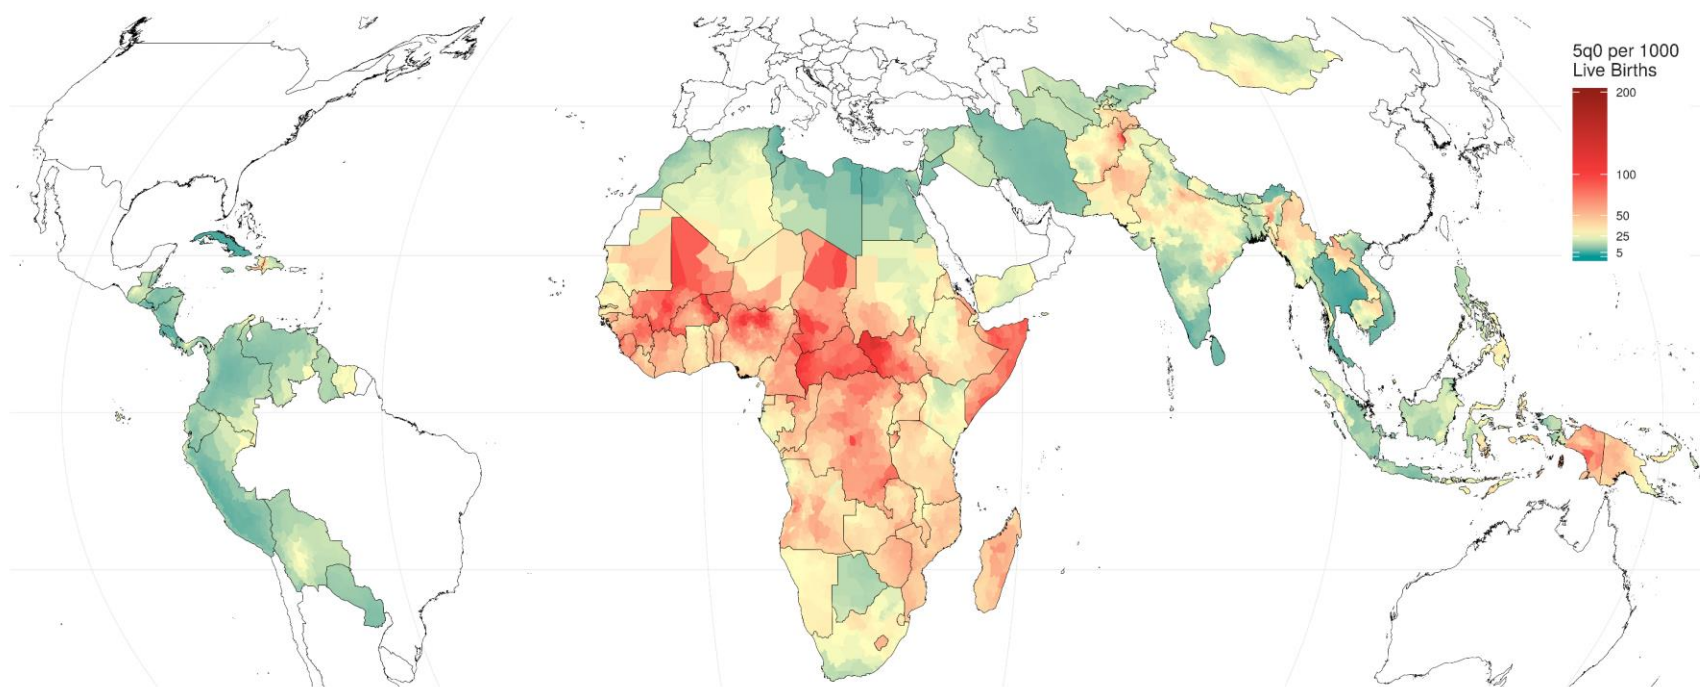

1151

1152

1153 *Supplementary Figure 6.7: Under-5 mortality probability by second administrative subdivision in 2000, normalized to the mean under-5 mortality*  
1154 *probability within each country*

1155 The resulting map shows subnational deviation in under-5 mortality probability from national averages in the year 2000.

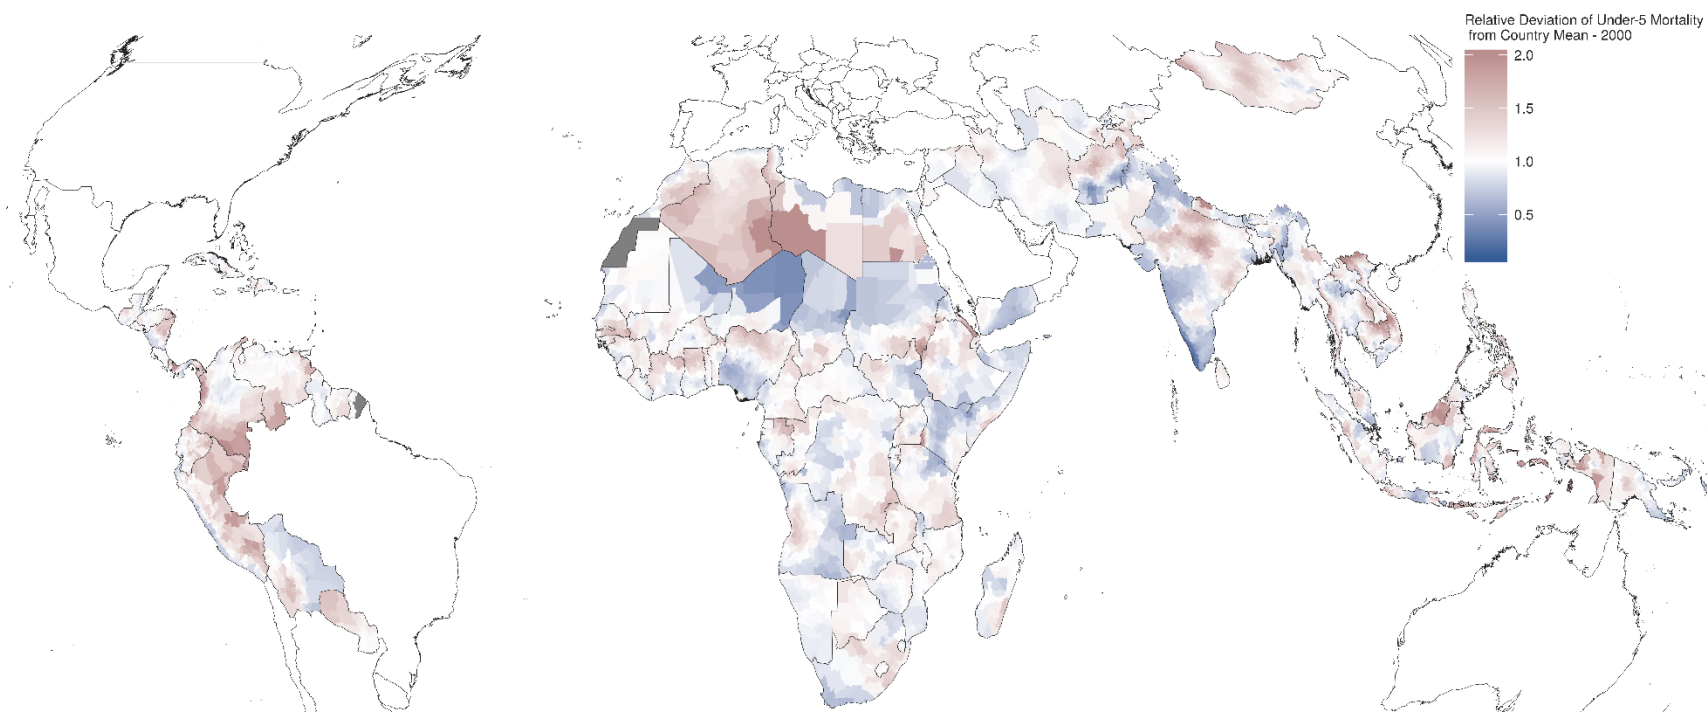

1156

1157



1158 *Supplementary Figure 6.8: Under-5 mortality probability by second administrative subdivision in 2017, normalized to the mean under-5 mortality*  
1159 *probability within each country*

1160 The resulting map shows subnational deviation in under-5 mortality probability from national averages in the year 2017.

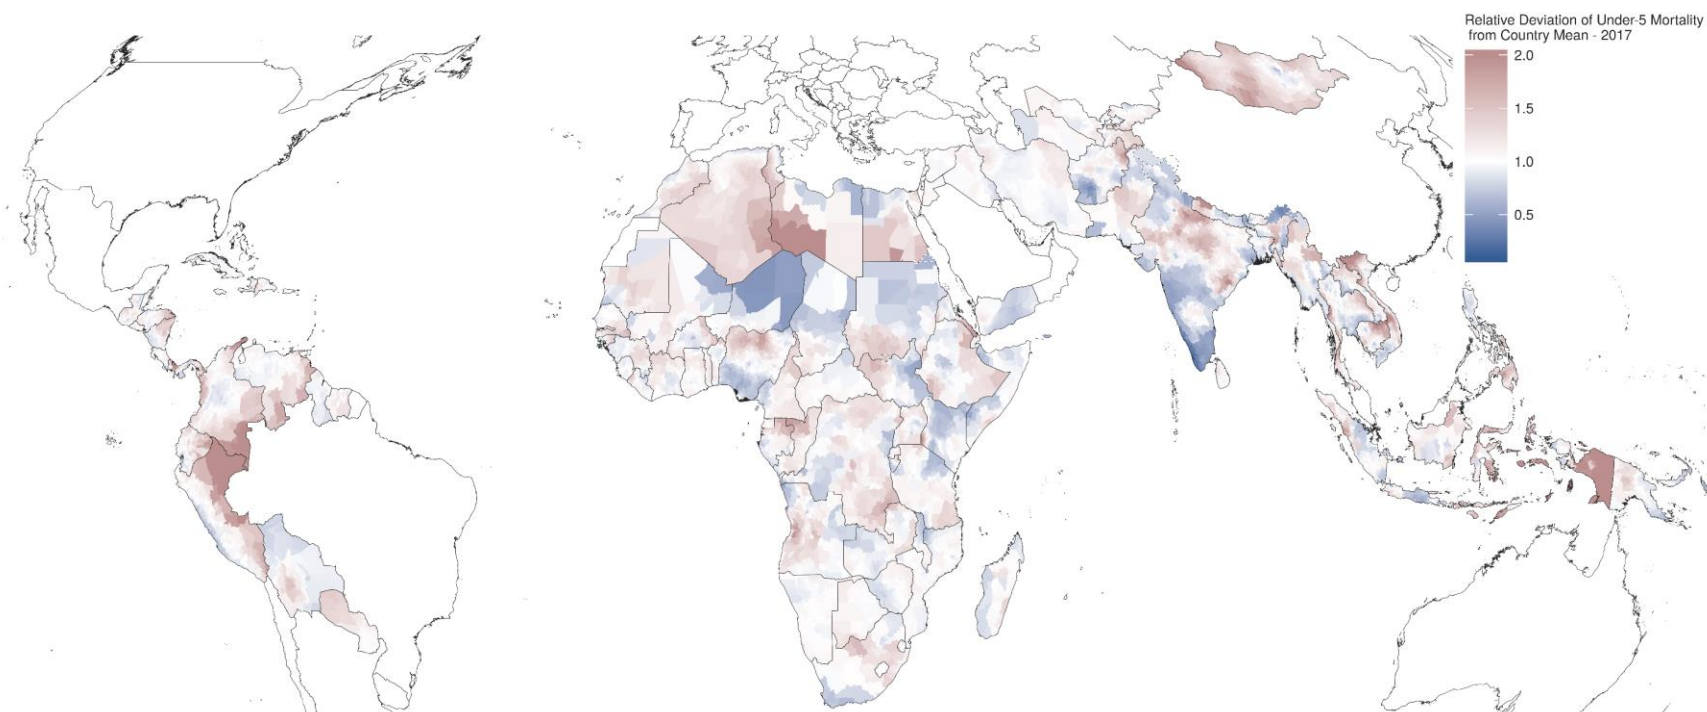

1161

1162

1163

*Supplementary Figure 6.9: Number of under-5 deaths, distributed across level of under-5 mortality rate in 2017 across 100 countries*

The top figure represents total under-5 deaths in 2017 as distributed across bins of under-5 mortality rate. The color of each bar represents mutually exclusive age groups for neonatal (birth through 28 days), post-neonatal (28 days through one year), and child (1 year through 5 years). The bottom figure shows the same distribution such that each bar is normalized by the bar height to show the relative distribution in number of deaths across these age bins. At lower under-5 mortality rates, nearly 50% of child deaths occur in the first month of life, whereas in most areas with under-5 mortality rate greater than 100 deaths per 1,000 live births, around 30% of deaths occur in the first month of life, and nearly 50% occur in children 1 year and older.

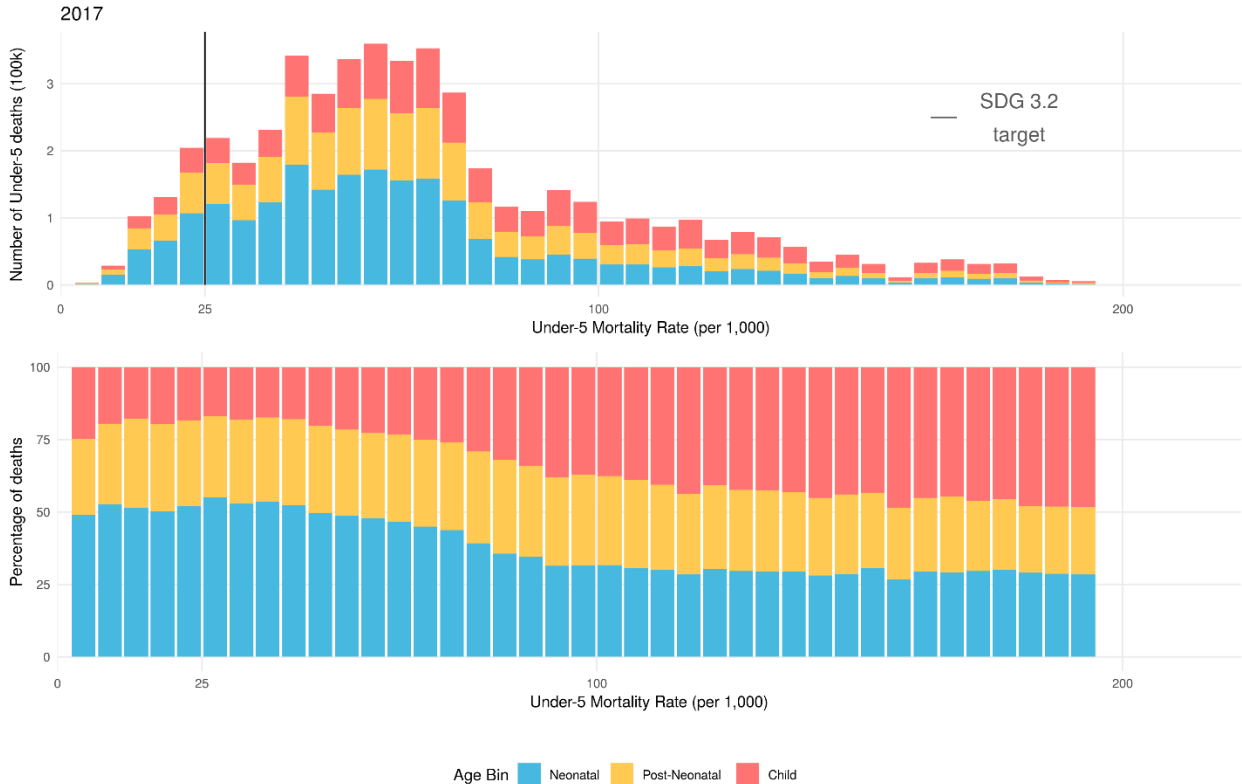

Supplementary Figure 6.10: Point data availability per pixel by modeling region, 2000–2017

Estimates of data availability were generated by counting the number of pixels in a modeling region with an overlapping data point in a given year, and dividing by the total number of pixels estimated in that modeling region and year after masking areas with very low population. The figure below shows data availability per pixel as it exists within the final modeling dataset; in this plot, observations at the polygon level have been resampled to points and are included in the estimate of data availability.

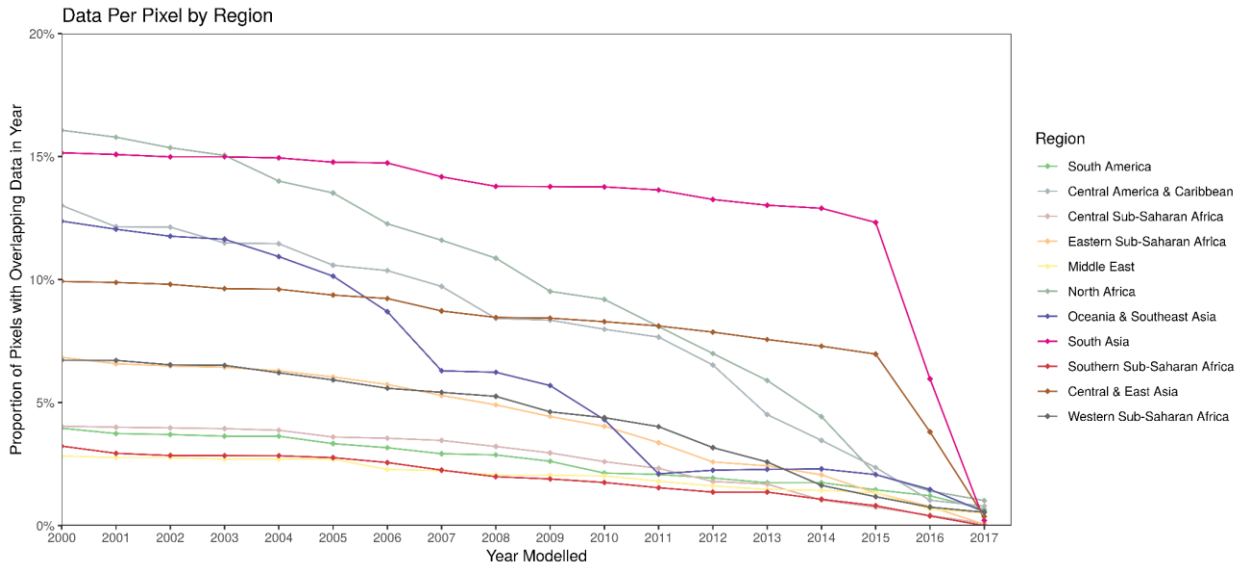

*Supplementary Figure 6.11: Point data availability per pixel by modeling region, 2000–2017, after dropping observations*

Estimates of data availability were generated by counting the number of pixels in a modeling region with an overlapping data point in a given year, and dividing by the total number of pixels estimated in that modeling region and year after masking areas with very low population. The figure below shows data availability per pixel after dropping all observations matched to areal (polygon) units such as administrative divisions, showing only data availability for true point observations.

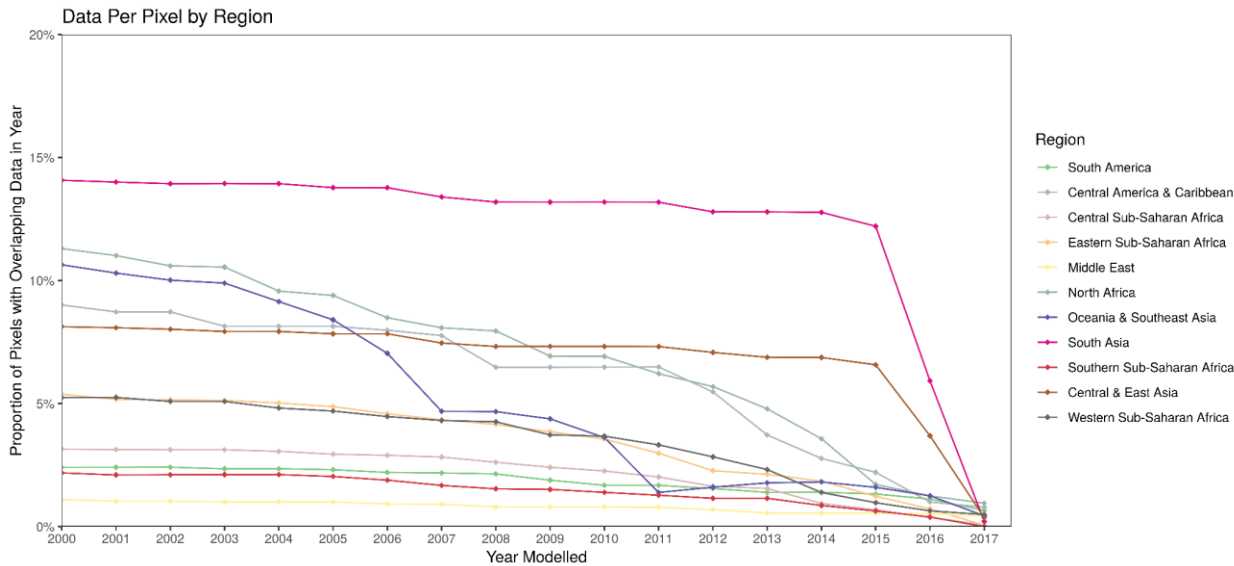

*Supplementary Figure 6.12: Change in absolute and relative inequalities in under-5 mortality rate across second administrative level units between 2000 and 2017.*

The first plot below looks at absolute inequalities (U5MR in a second administrative level unit minus the country mean U5MR). The second plot looks at relative inequalities (U5MR in a second administrative level unit divided by the country mean U5MR). A slope less than 45 degrees indicates declining inequality between 2000 and 2017, while a steeper slope indicates increasing inequality. In the absolute difference plot, we see an attenuated slope, indicating that absolute inequalities have on average declined since 2000. Since we would expect absolute inequality to decline as mortality rate declines, but would only expect relative inequalities to decline if certain policies/programs/processes were implicitly in place to do so (since its less sensitive to boundary effect), this indicates that reductions in absolute mortality inequality are more a function of the convergence toward a lower mortality, rather than a strictly egalitarian reduction of within-country inequality.

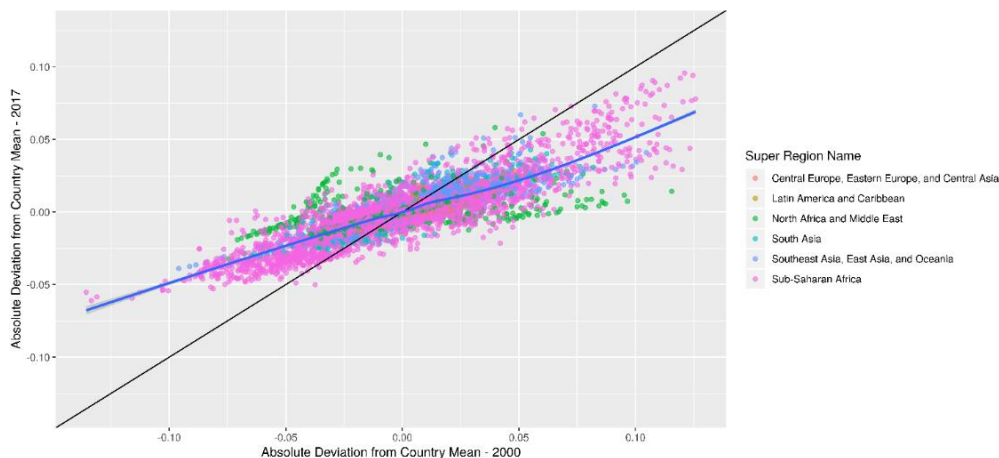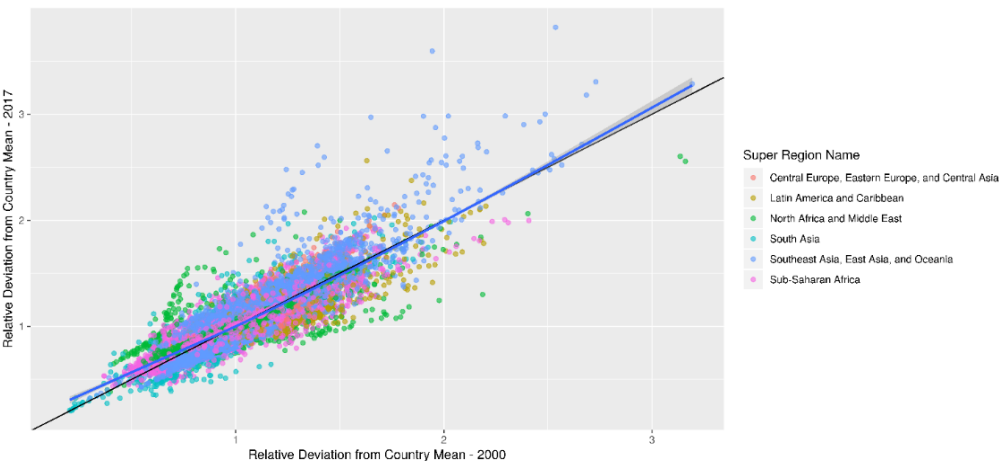

## 7 References

1. Golding, N. *et al.* Mapping under-5 and neonatal mortality in Africa, 2000–15: a baseline analysis for the Sustainable Development Goals. *The Lancet* **390**, 2171–2182 (2017).
2. Reiner, R. C. *et al.* Variation in Childhood Diarrheal Morbidity and Mortality in Africa, 2000–2015. *N. Engl. J. Med.* **379**, 1128–1138 (2018).
3. Osgood-Zimmerman, A. *et al.* Mapping child growth failure in Africa between 2000 and 2015. *Nature* **555**, 41–47 (2018).
4. Graetz, N. *et al.* Mapping local variation in educational attainment across Africa. *Nature* **555**, 48–53 (2018).
5. Burstein, R., Wang, H., Jr, R. C. R. & Hay, S. I. Development and validation of a new method for indirect estimation of neonatal, infant, and child mortality trends using summary birth histories. *PLOS Med.* **15**, e1002687 (2018).
6. Kristensen, K. *et al.* *TMB: Template Model Builder: A General Random Effect Tool Inspired by 'ADMB'*. (2018).
7. GBD 2017 Mortality Collaborators. Global, regional, and national age-sex-specific mortality and life expectancy, 1950–2017: a systematic analysis for the Global Burden of Disease Study 2017. *The Lancet* **392**, 1684–1735 (2018).
8. Ahmad, O. B., Lopez, A. D. & Inoue, M. The decline in child mortality: a reappraisal. *Bull. World Health Organ.* **78**, 1175–1191 (2000).
9. Somoza, J. L. Illustrative analysis of infant and child mortality in Colombia; draft for comments. (1980).
10. Infant and child mortality: levels, trends and demographic differentials. | POPLINE.org. Available at: <https://www.popline.org/node/399179>. (Accessed: 21st January 2019)

- 1233 11. Preston, S., Heuveline, P. & Guillot, M. *Demography: Measuring and Modeling Population Processes*.  
1234 (Wiley-Blackwell, 2000).
- 1235 12. Karra, M., Fink, G. & Canning, D. Facility distance and child mortality: a multi-country study of health  
1236 facility access, service utilization, and child health outcomes. *Int. J. Epidemiol.* **46**, 817–826 (2017).
- 1237 13. Wang, L. Determinants of child mortality in LDCs: Empirical findings from demographic and health  
1238 surveys. *Health Policy* **65**, 277–299 (2003).
- 1239 14. Proville, J., Zavala-Araiza, D. & Wagner, G. Night-time lights: A global, long term look at links to  
1240 socio-economic trends. *PLoS ONE* **12**, (2017).
- 1241 15. Browne, A. W. & Barrett, H. R. Female Education in Sub-Saharan Africa: The Key to Development?  
1242 *Comp. Educ.* **27**, 275–285 (1991).
- 1243 16. Gakidou, E., Cowling, K., Lozano, R. & Murray, C. J. Increased educational attainment and its effect  
1244 on child mortality in 175 countries between 1970 and 2009: a systematic analysis. *The Lancet* **376**,  
1245 959–974 (2010).
- 1246 17. Heft-Neal, S., Burney, J., Bendavid, E. & Burke, M. Robust relationship between air quality and infant  
1247 mortality in Africa. *Nature* **559**, 254–258 (2018).
- 1248 18. Sah, R. K. The Effects of Child Mortality Changes on Fertility Choice and Parental Welfare. *J. Polit.*  
1249 *Econ.* **99**, 582–606 (1991).
- 1250 19. Coale, A. J. Demographic Transition. in *Social Economics* (eds. Eatwell, J., Milgate, M. & Newman, P.)  
1251 16–23 (Palgrave Macmillan UK, 1989). doi:10.1007/978-1-349-19806-1\_4
- 1252 20. Eckert, S. & Kohler, S. Urbanization and health in developing countries: a systematic review. *World*  
1253 *Health Popul.* **15**, 7–20 (2014).
- 1254 21. Akachi, Y., Steenland, M. & Fink, G. Associations between key intervention coverage and child  
1255 mortality: an analysis of 241 sub-national regions of sub-Saharan Africa. *Int. J. Epidemiol.* (2017).  
1256 doi:10.1093/ije/dyx262



22. Ehreth, J. The global value of vaccination. *Vaccine* **21**, 596–600 (2003).
23. Madhi, S. A., Levine, O. S., Hajjeh, R., Mansoor, O. D. & Cherian, T. Vaccines to prevent pneumonia and improve child survival. *Bull. World Health Organ.* **86**, 365–372 (2008).
24. Akachi, Y. & Atun, R. Effect of investment in malaria control on child mortality in sub-Saharan Africa in 2002–2008. *PloS One* **6**, e21309 (2011).
25. Eisele, T. P. *et al.* Estimates of child deaths prevented from malaria prevention scale-up in Africa 2001–2010. *Malar. J.* **11**, 93 (2012).
26. GBD 2017 Risk Factors Collaborators. Global, regional, and national comparative risk assessment of 84 behavioural, environmental and occupational, and metabolic risks or clusters of risks, 1990–2017: a systematic analysis for the Global Burden of Disease Study 2017. *The Lancet* (In Press).
27. Black, R. E. *et al.* Maternal and child undernutrition: global and regional exposures and health consequences. *The Lancet* **371**, 243–260 (2008).
28. Pelletier, D. L. & Frongillo, E. A. Changes in Child Survival Are Strongly Associated with Changes in Malnutrition in Developing Countries. *J. Nutr.* **133**, 107–119 (2003).
29. Lindgren, F., Rue, H. & Lindström, J. An explicit link between Gaussian fields and Gaussian Markov random fields: the stochastic partial differential equation approach. *R. Stat. Soc.* **73**, 423–498 (2011).
30. Patil, A. P., Gething, P. W., Piel, F. B. & Hay, S. I. Bayesian geostatistics in health cartography: the perspective of malaria. *Trends Parasitol.* **27**, 246–253 (2011).
31. Bell, M. *et al.* Internal Migration and Development: Comparing Migration Intensities Around the World. *Popul. Dev. Rev.* **41**, 33–58 (2015).

1280 **8 Data sources**

1281 *Supplementary Table 8.1: Data sources included in analysis*

| Country     | Year | Data Type | Children Born | Polygons | Points | Citation                                                                                                                                                                                                                                                                                                                                          | GHDx ID |
|-------------|------|-----------|---------------|----------|--------|---------------------------------------------------------------------------------------------------------------------------------------------------------------------------------------------------------------------------------------------------------------------------------------------------------------------------------------------------|---------|
| Afghanistan | 2006 | SBH       | 39724         | 29       | 0      | Indian Institute of Health Management Research (IIHMR), Johns Hopkins University, Ministry of Public Health (Afghanistan). Afghanistan Health Survey 2006.                                                                                                                                                                                        | 18468   |
| Afghanistan | 2010 | CBH       | 113806        | 34       | 0      | Central Statistics Organization (Afghanistan), ICF Macro, Indian Institute of Health Management Research (IIHMR), Ministry of Public Health (Afghanistan), World Health Organization Regional Office for the Eastern Mediterranean (EMRO-WHO). Afghanistan Special Demographic and Health Survey 2010. Fairfax, United States: ICF International. | 56099   |
| Afghanistan | 2011 | SBH       | 64660         | 34       | 0      | Central Statistics Organization (Afghanistan), United Nations Children's Fund (UNICEF). Afghanistan Multiple Indicator Cluster Survey 2010-2011. New York, United States: United Nations Children's Fund (UNICEF), 2013.                                                                                                                          | 56830   |
| Afghanistan | 2016 | CBH       | 125715        | 310      | 0      | Central Statistics Organization (Afghanistan), ICF International, Ministry of Public Health (Afghanistan). Afghanistan Demographic and Health Survey 2015-2016. Fairfax, United States: ICF International, 2017.                                                                                                                                  | 157018  |
| Algeria     | 2002 | CBH       | 29406         | 47       | 0      | National Office of Statistics (Algeria), Ministry of Health, Population and Hospital Reform (Algeria), League of Arab States. Algeria Family Health Survey 2002-2003.                                                                                                                                                                             | 627     |
| Algeria     | 2013 | CBH       | 58390         | 7        | 0      | Ministry of Health and Population (Algeria), United Nations Children's Fund (UNICEF). Algeria Multiple Indicator Cluster Survey 2012-2013. New York, United States: United                                                                                                                                                                        | 210614  |

| Country    | Year | Data Type | Children Born | Polygons | Points | Citation                                                                                                                                                                                                                             | GHDx ID |
|------------|------|-----------|---------------|----------|--------|--------------------------------------------------------------------------------------------------------------------------------------------------------------------------------------------------------------------------------------|---------|
|            |      |           |               |          |        | Nations Children's Fund (UNICEF), 2018.                                                                                                                                                                                              |         |
| Angola     | 2001 | SBH       | 23916         | 18       | 0      | National Institute of Statistics (Angola), United Nations Children's Fund (UNICEF). Angola Multiple Indicator Cluster Survey 2001. New York, United States: United Nations Children's Fund (UNICEF).                                 | 687     |
| Angola     | 2007 | CBH       | 2932          | 0        | 115    | COSEP-Consulting Ltd., Consaude Ltd., Macro International, Inc, Ministry of Health (Angola). Angola Malaria Indicator Survey 2006-2007. Fairfax, United States: ICF International.                                                   | 672     |
| Angola     | 2009 | SBH       | 41890         | 18       | 0      | National Institute of Statistics (Angola), Oxford Policy Management, United Nations Children's Fund (UNICEF). Angola Integrated Inquiry into People's Well-Being 2008-2009.                                                          | 30394   |
| Angola     | 2011 | CBH       | 22925         | 0        | 230    | COSEP-Consulting Ltd., Consaude Ltd., ICF International, National Malaria Control (Angola), President's Malaria Initiative (PMI). Angola Malaria Indicator Survey 2011. Fairfax, United States: ICF International.                   | 56169   |
| Angola     | 2016 | CBH       | 42002         | 18       | 625    | ICF International, Ministry of Health (Angola), National Institute of Statistics (Angola), United Nations Children's Fund (UNICEF). Angola Demographic and Health Survey 2015-2016. Fairfax, United States: ICF International, 2017. | 218555  |
| Bangladesh | 2000 | CBH       | 31925         | 0        | 341    | Macro Systems, Inc, Mitra and Associates, National Institute of Population Research and Training (NIPORT). Bangladesh Demographic and Health Survey 1999-2000. Fairfax, United States: ICF International.                            | 26826   |

| Country    | Year | Data Type | Children Born | Polygons | Points | Citation                                                                                                                                                                                                                                                                                                                                                           | GHDx ID |
|------------|------|-----------|---------------|----------|--------|--------------------------------------------------------------------------------------------------------------------------------------------------------------------------------------------------------------------------------------------------------------------------------------------------------------------------------------------------------------------|---------|
| Bangladesh | 2001 | CBH       | 319622        | 64       | 0      | Associates for Community and Population Research (ACPR), International Centre for Diarrhoeal Disease Research, Bangladesh (ICDDR,B), Johns Hopkins University, Mitra and Associates, National Institute of Population Research and Training (NIPORT), ORC Macro. Bangladesh Special Demographic and Health Survey 2001. Fairfax, United States: ICF International. | 18920   |
| Bangladesh | 2004 | CBH       | 33605         | 0        | 359    | Mitra and Associates, ORC Macro. Bangladesh Demographic and Health Survey 2004. Fairfax, United States: ICF International.                                                                                                                                                                                                                                         | 18902   |
| Bangladesh | 2007 | CBH       | 30527         | 0        | 361    | Macro International, Inc, Mitra and Associates, National Institute of Population Research and Training (NIPORT). Bangladesh Demographic and Health Survey 2007. Fairfax, United States: ICF International, 2009.                                                                                                                                                   | 18913   |
| Bangladesh | 2009 | SBH       | 705724        | 6        | 0      | Bangladesh Bureau of Statistics (BBS). Bangladesh Multiple Indicator Cluster Survey 2009. Dhaka, Bangladesh: Bangladesh Bureau of Statistics (BBS).                                                                                                                                                                                                                | 126906  |
| Bangladesh | 2012 | CBH       | 45844         | 0        | 600    | ICF Macro, Mitra and Associates, National Institute of Population Research and Training (NIPORT). Bangladesh Demographic and Health Survey 2011-2012. Calverton, United States: ICF Macro.                                                                                                                                                                         | 55956   |
| Bangladesh | 2013 | SBH       | 112041        | 0        | 2628   | Bangladesh Bureau of Statistics (BBS), Government of Bangladesh, Ministry of Planning (Bangladesh), United Nations Children's Fund (UNICEF). Bangladesh Multiple Indicator Cluster Survey 2012-2013. New York, United States: United Nations Children's Fund (UNICEF), 2015.                                                                                       | 151086  |

| Country    | Year | Data Type | Children Born | Polygons | Points | Citation                                                                                                                                                                                                                                                                                                                        | GHDx ID |
|------------|------|-----------|---------------|----------|--------|---------------------------------------------------------------------------------------------------------------------------------------------------------------------------------------------------------------------------------------------------------------------------------------------------------------------------------|---------|
| Bangladesh | 2014 | CBH       | 43772         | 7        | 0      | ICF International, Mitra and Associates, National Institute of Population Research and Training (NIPORT). Bangladesh Demographic and Health Survey 2014. Fairfax, United States: ICF International, 2015.                                                                                                                       | 157021  |
| Belize     | 2006 | SBH       | 4206          | 6        | 0      | Statistical Institute of Belize, United Nations Children's Fund (UNICEF). Belize Multiple Indicator Cluster Survey 2006. New York, United States: United Nations Children's Fund (UNICEF).                                                                                                                                      | 1089    |
| Belize     | 2011 | SBH       | 8888          | 7        | 0      | Statistical Institute of Belize, United Nations Children's Fund (UNICEF). Belize Multiple Indicator Cluster Survey 2011. New York, United States: United Nations Children's Fund (UNICEF), 2013.                                                                                                                                | 76699   |
| Belize     | 2015 | CBH       | 19904         | 6        | 0      | Government of Belize, Statistical Institute of Belize, UN Resident Coordinator Fund (UN ResCor), United Nations Children's Fund (UNICEF), United Nations Development Programme (UNDP). Belize Multiple Indicator Cluster Survey 2015-2016. New York, United States: United Nations Children's Fund (UNICEF), 2018.              | 264910  |
| Benin      | 2001 | CBH       | 19398         | 0        | 247    | National Institute of Statistics and Economic Analysis (INSAE) (Benin), ORC Macro. Benin Demographic and Health Survey 2001. Fairfax, United States: ICF International.                                                                                                                                                         | 18950   |
| Benin      | 2002 | SBH       | 440265        | 76       | 0      | National Institute of Statistics and Economic Analysis (INSAE) (Benin), Minnesota Population Center. Benin Population and Housing Census 2002 from the Integrated Public Use Microdata Series, International. Minneapolis, MN: IPUMS, 2018. <a href="https://doi.org/10.18128/D020.V7.1">https://doi.org/10.18128/D020.V7.1</a> | 367347  |

| Country | Year | Data Type | Children Born | Polygons | Points | Citation                                                                                                                                                                                                                                 | GHDx ID             |
|---------|------|-----------|---------------|----------|--------|------------------------------------------------------------------------------------------------------------------------------------------------------------------------------------------------------------------------------------------|---------------------|
| Benin   | 2006 | CBH       | 57232         | 12       | 0      | Macro International, Inc, National Institute of Statistics and Economic Analysis (INSAE) (Benin), National Program Against AIDS (PNLS) (Benin). Benin Demographic and Health Survey 2006. Fairfax, United States: ICF International.     | 18959               |
| Benin   | 2012 | CBH       | 47152         | 0        | 746    | ICF International, National Institute of Statistics and Economic Analysis (INSAE) (Benin), National Program Against AIDS (PNLS) (Benin). Benin Demographic and Health Survey 2011-2012. Fairfax, United States: ICF International, 2014. | 79839               |
| Benin   | 2014 | CBH       | 45183         | 12       | 0      | National Institute of Statistics and Economic Analysis (INSAE) (Benin), United Nations Children's Fund (UNICEF). Benin Multiple Indicator Cluster Survey 2014. New York, United States: United Nations Children's Fund (UNICEF), 2017.   | 206075              |
| Bhutan  | 2010 | SBH       | 31697         | 20       | 0      | National Statistics Bureau (Bhutan), United Nations Children's Fund (UNICEF), United Nations Population Fund (UNFPA). Bhutan Multiple Indicator Cluster Survey 2010. New York, United States: United Nations Children's Fund (UNICEF).   | 40028               |
| Bhutan  | 2013 | SBH       | 58980         | 19       | 0      | Ministry of Health (Bhutan), National Statistics Bureau (Bhutan), United Nations Population Fund (UNFPA). Bhutan Health Survey 2012-2013.                                                                                                | 165290 <sup>+</sup> |
| Bhutan  | 2017 | SBH       | 307521        | 20       | 0      | National Statistics Bureau (Bhutan). Bhutan Population and Housing Census 2017.                                                                                                                                                          | 325119 <sup>+</sup> |

| Country | Year | Data Type | Children Born | Polygons | Points | Citation                                                                                                                                                                                                                                                           | GHDx ID |
|---------|------|-----------|---------------|----------|--------|--------------------------------------------------------------------------------------------------------------------------------------------------------------------------------------------------------------------------------------------------------------------|---------|
| Bolivia | 2001 | SBH       | 486216        | 83       | 0      | National Institute of Statistics (Bolivia), Minnesota Population Center. Bolivia National Census of Population and Housing 2001 from the Integrated Public Use Microdata Series, International: [Machine-readable database]. Minneapolis: University of Minnesota. | 1362    |
| Bolivia | 2004 | CBH       | 45116         | 8        | 0      | Macro International, Inc, Ministry of Health and Sports (Bolivia), National Institute of Statistics (Bolivia). Bolivia Demographic and Health Survey 2003-2004. Fairfax, United States: ICF International.                                                         | 19001   |
| Bolivia | 2006 | SBH       | 9130          | 9        | 0      | National Institute of Statistics (Bolivia). Bolivia Household Survey 2006. La Paz, Bolivia: National Institute of Statistics (Bolivia).                                                                                                                            | 148343  |
| Bolivia | 2007 | SBH       | 9062          | 9        | 0      | National Institute of Statistics (Bolivia). Bolivia Household Survey 2007. La Paz, Bolivia: National Institute of Statistics (Bolivia).                                                                                                                            | 148344  |
| Bolivia | 2008 | CBH       | 40355         | 0        | 998    | Macro International, Inc, Ministry of Health and Sports (Bolivia), National Institute of Statistics (Bolivia). Bolivia Demographic and Health Survey 2008. Fairfax, United States: ICF International.                                                              | 19016   |
| Bolivia | 2008 | SBH       | 7851          | 9        | 0      | National Institute of Statistics (Bolivia). Bolivia Household Survey 2008. La Paz, Bolivia: National Institute of Statistics (Bolivia).                                                                                                                            | 148345  |
| Bolivia | 2009 | SBH       | 8316          | 9        | 0      | National Institute of Statistics (Bolivia). Bolivia Household Survey 2009. La Paz, Bolivia: National Institute of Statistics (Bolivia).                                                                                                                            | 148346  |
| Bolivia | 2011 | SBH       | 17415         | 9        | 0      | National Institute of Statistics (Bolivia). Bolivia Household Survey 2011. La Paz, Bolivia: National Institute of Statistics (Bolivia).                                                                                                                            | 164634  |

| Country  | Year | Data Type | Children Born | Polygons | Points | Citation                                                                                                                                                                                                                      | GHDx ID |
|----------|------|-----------|---------------|----------|--------|-------------------------------------------------------------------------------------------------------------------------------------------------------------------------------------------------------------------------------|---------|
| Bolivia  | 2013 | SBH       | 16035         | 9        | 0      | National Institute of Statistics (Bolivia). Bolivia Household Survey 2013. La Paz, Bolivia: National Institute of Statistics (Bolivia).                                                                                       | 164635  |
| Bolivia  | 2014 | SBH       | 17204         | 9        | 0      | National Institute of Statistics (Bolivia). Bolivia Household Survey 2014. La Paz, Bolivia: National Institute of Statistics (Bolivia).                                                                                       | 283486  |
| Bolivia  | 2015 | SBH       | 17208         | 9        | 0      | National Institute of Statistics (Bolivia), United Nations Economic Commission for Latin America and the Caribbean (ECLAC). Bolivia Household Survey 2015. La Paz, Bolivia: National Institute of Statistics (Bolivia), 2015. | 317285  |
| Bolivia  | 2016 | CBH       | 24072         | 9        | 0      | Ministry of Health (Bolivia), National Institute of Statistics (Bolivia). Bolivia Demographic and Health Survey 2016. La Paz, Bolivia: National Institute of Statistics (Bolivia), 2017.                                      | 323944  |
| Bolivia  | 2016 | SBH       | 17632         | 9        | 0      | National Institute of Statistics (Bolivia), United Nations Economic Commission for Latin America and the Caribbean (ECLAC). Bolivia Household Survey 2016.                                                                    | 336686  |
| Botswana | 2001 | SBH       | 92210         | 22       | 0      | Central Statistics Office (Botswana), Minnesota Population Center. Botswana Population and Housing Census 2001 from the Integrated Public Use Microdata Series, International. Minneapolis: University of Minnesota, 2017.    | 294205  |
| Botswana | 2006 | SBH       | 22725         | 25       | 0      | Central Statistics Office (Botswana). Botswana Demographic Survey 2006. Gaborone, Botswana: Central Statistics Office (Botswana).                                                                                             | 21970   |
| Botswana | 2008 | CBH       | 10858         | 330      | 0      | Central Statistics Office (Botswana). Botswana Family Health Survey 2007-2008. Gaborone, Botswana: Central Statistics Office (Botswana), 2009.                                                                                | 22125   |



| Country      | Year | Data Type | Children Born | Polygons | Points | Citation                                                                                                                                                                                                                                                                                                                                                                                                                            | GHDx ID |
|--------------|------|-----------|---------------|----------|--------|-------------------------------------------------------------------------------------------------------------------------------------------------------------------------------------------------------------------------------------------------------------------------------------------------------------------------------------------------------------------------------------------------------------------------------------|---------|
| Botswana     | 2011 | SBH       | 95455         | 22       | 0      | Central Statistics Office (Botswana), Minnesota Population Center. Botswana Population and Housing Census 2011 from the Integrated Public Use Microdata Series, International. Minneapolis: University of Minnesota, 2017.                                                                                                                                                                                                          | 294235  |
| Burkina Faso | 2003 | CBH       | 41520         | 0        | 397    | Macro International, Inc, National Institute of Statistics and Demography (Burkina Faso). Burkina Faso Demographic and Health Survey 2003. Fairfax, United States: ICF International.                                                                                                                                                                                                                                               | 19088   |
| Burkina Faso | 2006 | SBH       | 25541         | 0        | 195    | National Institute of Statistics and Demography (Burkina Faso), United Nations Children's Fund (UNICEF). Burkina Faso Multiple Indicator Cluster Survey 2006. New York, United States: United Nations Children's Fund (UNICEF).                                                                                                                                                                                                     | 1927    |
| Burkina Faso | 2006 | SBH       | 946930        | 236      | 0      | Minnesota Population Center, National Institute of Statistics and Demography (Burkina Faso). Burkina Faso Population and Housing Census 2006 from the Integrated Public Use Microdata Series, International: [Machine-readable database]. Minneapolis: University of Minnesota, 2013.                                                                                                                                               | 105403  |
| Burkina Faso | 2010 | SBH       | 5816          | 2        | 0      | Institut de Recherche pour le Developpement (IRD); Institut de Recherche en Sciences de la Sante (IRSS); and HarvestPlus, International Food Policy Research Institute (IFPRI). 2016. Food consumption and iron status survey in two provinces of rural Burkina Faso. Washington, DC: International Food Policy Research Institute (IFPRI). <a href="http://dx.doi.org/10.7910/DVN/5CXCLX">http://dx.doi.org/10.7910/DVN/5CXCLX</a> | 283273  |

| Country      | Year | Data Type | Children Born | Polygons | Points | Citation                                                                                                                                                                                                                                                                     | GHDx ID |
|--------------|------|-----------|---------------|----------|--------|------------------------------------------------------------------------------------------------------------------------------------------------------------------------------------------------------------------------------------------------------------------------------|---------|
| Burkina Faso | 2011 | CBH       | 56178         | 0        | 541    | ICF Macro, Ministry of Health (Burkina Faso), National Institute of Statistics and Demography (Burkina Faso). Burkina Faso Demographic and Health Survey 2010-2011. Fairfax, United States: ICF International.                                                               | 19133   |
| Burkina Faso | 2014 | SBH       | 27986         | 0        | 248    | ICF International, National Institute of Statistics and Demography (Burkina Faso), National Program for the Fight Against Malaria (PNLP) (Burkina Faso). Burkina Faso Malaria Indicator Survey 2014. Fairfax, United States: ICF International, 2015.                        | 188785  |
| Burundi      | 2005 | SBH       | 25768         | 554      | 0      | United Nations Children's Fund (UNICEF), Burundi Institute of Statistics and Economic Studies, United Nations Population Fund (UNFPA). Burundi Multiple Indicator Cluster Survey 2005. New York, United States: United Nations Children's Fund (UNICEF).                     | 1981    |
| Burundi      | 2011 | CBH       | 24520         | 0        | 376    | Burundi Institute of Statistics and Economic Studies, ICF International, Ministry of Public Health and the Fight Against AIDS (Burundi). Burundi Demographic and Health Survey 2010-2011. Fairfax, United States: ICF International, 2012.                                   | 30431   |
| Burundi      | 2013 | SBH       | 13647         | 0        | 200    | Burundi Institute of Statistics and Economic Studies, ICF Macro, Ministry of Public Health and the Fight Against AIDS (Burundi), National Institute of Public Health (Burundi). Burundi Malaria Indicator Survey 2012-2013. Fairfax, United States: ICF International, 2013. | 108080  |
| Burundi      | 2016 | CBH       | 45201         | 0        | 552    | Burundi Institute of Statistics and Economic Studies, ICF International, Ministry of Public Health and the Fight Against AIDS (Burundi). Burundi Demographic and Health Survey 2016-2017. Fairfax, United States: ICF International, 2018.                                   | 286766  |

| Country  | Year | Data Type | Children Born | Polygons | Points | Citation                                                                                                                                                                                                                                                   | GHDx ID |
|----------|------|-----------|---------------|----------|--------|------------------------------------------------------------------------------------------------------------------------------------------------------------------------------------------------------------------------------------------------------------|---------|
| Cambodia | 2000 | CBH       | 40990         | 0        | 470    | Macro International, Inc, Ministry of Health (Cambodia), National Institute of Statistics (Cambodia). Cambodia Demographic and Health Survey 2000. Fairfax, United States: ICF International.                                                              | 19156   |
| Cambodia | 2004 | SBH       | 58962         | 24       | 0      | National Institute of Statistics (Cambodia). Cambodia Intercensal Population Survey 2004.                                                                                                                                                                  | 2002    |
| Cambodia | 2006 | CBH       | 40457         | 0        | 548    | Macro International, Inc, National Institute of Public Health (Cambodia), National Institute of Statistics (Cambodia). Cambodia Demographic and Health Survey 2005-2006. Fairfax, United States: ICF International.                                        | 19167   |
| Cambodia | 2008 | SBH       | 663330        | 173      | 0      | National Institute of Statistics (Cambodia), Minnesota Population Center. Cambodia General Population Census 2008 from the Integrated Public Use Microdata Series, International: [Machine-readable database]. Minneapolis: University of Minnesota, 2011. | 35329   |
| Cambodia | 2011 | CBH       | 37511         | 0        | 607    | ICF Macro, Ministry of Health (Cambodia), National Institute of Statistics (Cambodia). Cambodia Demographic and Health Survey 2010-2011. Fairfax, United States: ICF International.                                                                        | 30379   |
| Cambodia | 2013 | SBH       | 62285         | 24       | 0      | National Institute of Statistics (Cambodia), United Nations Population Fund (UNFPA). Cambodia Intercensal Population Survey 2013. Phnom Penh, Cambodia: National Institute of Statistics (Cambodia).                                                       | 164729  |
| Cambodia | 2014 | CBH       | 33290         | 0        | 611    | ICF International, Ministry of Health (Cambodia), National Institute of Statistics (Cambodia). Cambodia Demographic and Health Survey 2014. Fairfax, United States: ICF International, 2017.                                                               | 157024  |

| Country                  | Year | Data Type | Children Born | Polygons | Points | Citation                                                                                                                                                                                                                                                                                                                      | GHDx ID |
|--------------------------|------|-----------|---------------|----------|--------|-------------------------------------------------------------------------------------------------------------------------------------------------------------------------------------------------------------------------------------------------------------------------------------------------------------------------------|---------|
| Cameroon                 | 2004 | CBH       | 29455         | 0        | 463    | Macro International, Inc, National Institute of Statistics (Cameroon). Cameroon Demographic and Health Survey 2004. Fairfax, United States: ICF International.                                                                                                                                                                | 19211   |
| Cameroon                 | 2005 | SBH       | 1046500       | 209      | 0      | Minnesota Population Center, National Institute of Statistics (Cameroon), Central Bureau of the Census and Population Studies (Cameroon). Cameroon Population and Housing Census 2005 from the Integrated Public Use Microdata Series, International: [Machine-readable database]. Minneapolis: University of Minnesota, 2013 | 105800  |
| Cameroon                 | 2011 | CBH       | 42312         | 0        | 577    | ICF International, Ministry of Economy, Planning and Regional Development (Cameroon), Ministry of Public Health (Cameroon), National Institute of Statistics (Cameroon), Pasteur Center of Cameroon. Cameroon Demographic and Health Survey 2011. Fairfax, United States: ICF International.                                  | 19274   |
| Cameroon                 | 2014 | CBH       | 26201         | 12       | 0      | Ministry of Public Health (Cameroon), National Institute of Statistics (Cameroon), United Nations Children's Fund (UNICEF). Cameroon Multiple Indicator Cluster Survey 2014. New York, United States: United Nations Children's Fund (UNICEF), 2017.                                                                          | 244455  |
| Central African Republic | 2006 | SBH       | 35974         | 16       | 0      | United Nations Children's Fund (UNICEF). Central African Republic Multiple Indicator Cluster Survey 2006. New York, United States: United Nations Children's Fund (UNICEF).                                                                                                                                                   | 2223    |
| Central African Republic | 2011 | SBH       | 37331         | 17       | 0      | Central African Institute of Statistics, Economic and Social Studies (ICASEES) (Central African Republic), ICF International. Central African Republic Multiple Indicator Cluster Survey 2010-2011. Fairfax, United States: ICF International, 2013.                                                                          | 82832   |

| Country  | Year | Data Type | Children Born | Polygons | Points | Citation                                                                                                                                                                                                                                                                                                       | GHDx ID |
|----------|------|-----------|---------------|----------|--------|----------------------------------------------------------------------------------------------------------------------------------------------------------------------------------------------------------------------------------------------------------------------------------------------------------------|---------|
| Chad     | 2004 | CBH       | 21448         | 9        | 0      | Macro International, Inc, National Institute of Statistical, Economic and Demographic Studies (Chad). Chad Demographic and Health Survey 2004. Fairfax, United States: ICF International.                                                                                                                      | 19315   |
| Chad     | 2010 | SBH       | 61128         | 60       | 0      | Ministry of Planning, Economy, and International Cooperation (Chad), National Institute of Statistical, Economic and Demographic Studies (Chad), United Nations Children's Fund (UNICEF). Chad Multiple Indicator Cluster Survey 2010. New York, United States: United Nations Children's Fund (UNICEF), 2014. | 76701   |
| Chad     | 2015 | CBH       | 68989         | 0        | 624    | ICF International, National Institute of Statistical, Economic and Demographic Studies (Chad). Chad Demographic and Health Survey 2014-2015. Fairfax, United States: ICF International, 2016.                                                                                                                  | 157025  |
| Colombia | 2000 | CBH       | 21267         | 23       | 0      | Macro International, Inc, Profamilia (Colombia). Colombia Demographic and Health Survey 2000. Fairfax, United States: ICF International, 2000.                                                                                                                                                                 | 19359   |
| Colombia | 2005 | CBH       | 71278         | 33       | 0      | Macro International, Inc, Profamilia (Colombia). Colombia Demographic and Health Survey 2004-2005. Fairfax, United States: ICF International, 2005.                                                                                                                                                            | 19324   |
| Colombia | 2006 | SBH       | 1812545       | 489      | 0      | National Administrative Department of Statistics (DANE) (Colombia), Minnesota Population Center. Colombia General Census 2005-2006 from the Integrated Public Use Microdata Series, International: [Machine-readable database]. Minneapolis: University of Minnesota.                                          | 3029    |
| Colombia | 2010 | CBH       | 55239         | 21       | 0      | ICF Macro, Profamilia (Colombia). Colombia Demographic and Health Survey 2009-2010. Fairfax, United States: ICF International, 2011.                                                                                                                                                                           | 21281   |

| Country       | Year | Data Type | Children Born | Polygons | Points | Citation                                                                                                                                                                                                                                             | GHDx ID |
|---------------|------|-----------|---------------|----------|--------|------------------------------------------------------------------------------------------------------------------------------------------------------------------------------------------------------------------------------------------------------|---------|
| Colombia      | 2016 | CBH       | 62593         | 33       | 0      | ICF International, Ministry of Health (Colombia), Profamilia (Colombia). Colombia Demographic and Health Survey 2015-2016. Fairfax, United States: ICF International, 2017.                                                                          | 218566  |
| Comoros       | 2013 | CBH       | 11497         | 0        | 242    | General Directorate of Statistics and Forecasting (Comoros), ICF International. Comoros Demographic and Health Survey 2012-2013. Fairfax, United States: ICF International.                                                                          | 76850   |
| Costa Rica    | 2011 | SBH       | 175689        | 64       | 0      | Minnesota Population Center, Costa Rica National Institute of Statistics and Census. Costa Rica Census 2011 from the Integrated Public Use Microdata Series, International: [Machine-readable database]. Minneapolis: University of Minnesota, 2015. | 227111  |
| Cote d'Ivoire | 2005 | CBH       | 13358         | 11       | 0      | CDC Retro-CI, Ministry of the Fight Against AIDS (Cote d'Ivoire), National Institute of Statistics (Cote d'Ivoire), ORC Macro. Cote d'Ivoire AIDS Indicator Survey 2005. Fairfax, United States: ICF International.                                  | 56148   |
| Cote d'Ivoire | 2012 | CBH       | 28211         | 0        | 341    | ICF International, Ministry of the Fight Against AIDS (Cote d'Ivoire), National Institute of Statistics (Cote d'Ivoire). Cote d'Ivoire Demographic and Health Survey 2011-2012. Fairfax, United States: ICF International.                           | 18533   |
| Cote d'Ivoire | 2016 | CBH       | 32126         | 11       | 0      | National Institute of Statistics (Cote d'Ivoire), United Nations Children's Fund (UNICEF). Cote d'Ivoire Multiple Indicator Cluster Survey 2016. New York, United States: United Nations Children's Fund (UNICEF), 2018.                             | 218611  |
| Cuba          | 2011 | SBH       | 13154         | 15       | 0      | Ministry of Public Health (Cuba), United Nations Children's Fund (UNICEF). Cuba Multiple Indicator Cluster Survey 2010-2011. New York, United States: United Nations Children's Fund (UNICEF).                                                       | 60935   |

| Country                          | Year | Data Type | Children Born | Polygons | Points | Citation                                                                                                                                                                                                                                                                                                                          | GHDx ID |
|----------------------------------|------|-----------|---------------|----------|--------|-----------------------------------------------------------------------------------------------------------------------------------------------------------------------------------------------------------------------------------------------------------------------------------------------------------------------------------|---------|
| Cuba                             | 2014 | SBH       | 12553         | 4        | 0      | Ministry of Public Health (Cuba), National Office of Statistics (Cuba), United Nations Children's Fund (UNICEF). Cuba Multiple Indicator Cluster Survey 2014. New York, United States: United Nations Children's Fund (UNICEF), 2005.                                                                                             | 169975  |
| Democratic Republic of the Congo | 2001 | SBH       | 39356         | 11       | 0      | Ministry of Planning and Reconstruction (Congo, DR), United Nations Children's Fund (UNICEF). Congo, DR Multiple Indicator Cluster Survey 2001. New York, United States: United Nations Children's Fund (UNICEF).                                                                                                                 | 3161    |
| Democratic Republic of the Congo | 2007 | CBH       | 29548         | 0        | 293    | Macro International, Inc, Ministry of Planning (Congo, DR). Democratic Republic of the Congo Demographic and Health Survey 2007. Fairfax, United States: ICF International.                                                                                                                                                       | 19381   |
| Democratic Republic of the Congo | 2010 | SBH       | 40648         | 10       | 358    | National Statistical Institute (Congo, DR), Ministry of Planning (Congo, DR), United Nations Children's Fund (UNICEF). Congo, DR Multiple Indicator Cluster Survey 2010. New York, United States: United Nations Children's Fund (UNICEF).                                                                                        | 26998   |
| Democratic Republic of the Congo | 2013 | CBH       | 59276         | 0        | 492    | ICF International, Ministry of Planning and Monitoring Implementation of the Revolution of Modernity (Congo, DR), Ministry of Public Health (Congo, DR), National Institute of Statistics (Congo, DR). Democratic Republic of the Congo Demographic and Health Survey 2013-2014. Fairfax, United States: ICF International, 2014. | 76878   |
| Djibouti                         | 2002 | CBH       | 10574         | 1        | 0      | Department of Statistics and Demographic Studies (Djibouti), League of Arab States, Ministry of Health (Djibouti), Pan Arab Project for Family Health (PAPFAM). Djibouti Family Health Survey 2002.                                                                                                                               | 3392    |

| Country            | Year | Data Type | Children Born | Polygons | Points | Citation                                                                                                                                                                                                                                                                     | GHDx ID |
|--------------------|------|-----------|---------------|----------|--------|------------------------------------------------------------------------------------------------------------------------------------------------------------------------------------------------------------------------------------------------------------------------------|---------|
| Djibouti           | 2006 | SBH       | 10479         | 1        | 35     | Ministry of Economy, Finance, and Planning in charge of Privatization (Djibouti), Ministry of Health (Djibouti), United Nations Children's Fund (UNICEF). Djibouti Multiple Indicator Cluster Survey 2006. New York, United States: United Nations Children's Fund (UNICEF). | 3404    |
| Dominican Republic | 2002 | CBH       | 53667         | 32       | 0      | Center for Social and Demographic Studies (Dominican Republic) (CESDEM), Macro International, Inc. Dominican Republic Demographic and Health Survey 2002. Fairfax, United States: ICF International.                                                                         | 19444   |
| Dominican Republic | 2002 | SBH       | 415435        | 100      | 1      | National Statistics Office (Dominican Republic), Minnesota Population Center. Dominican Republic Census 2002 from the Integrated Public Use Microdata Series, International: [Machine-readable database]. Minneapolis: University of Minnesota.                              | 151296  |
| Dominican Republic | 2006 | CBH       | 18903         | 32       | 0      | National Statistics Office (Dominican Republic), United Nations Children's Fund (UNICEF). Dominican Republic National Multipurpose Household Survey 2006. Santo Domingo, Dominican Republic: National Statistics Office (Dominican Republic).                                | 3455    |
| Dominican Republic | 2007 | CBH       | 58037         | 0        | 1426   | Center for Social and Demographic Studies (Dominican Republic) (CESDEM), Macro International, Inc. Dominican Republic Demographic and Health Survey 2007. Fairfax, United States: ICF International.                                                                         | 19456   |
| Dominican Republic | 2010 | SBH       | 466537        | 97       | 0      | National Statistics Office (Dominican Republic), Minnesota Population Center. Dominican Republic Census 2010 from the Integrated Public Use Microdata Series, International: [Machine-readable database]. Minneapolis: University of Minnesota.                              | 151304  |



| Country            | Year | Data Type | Children Born | Polygons | Points | Citation                                                                                                                                                                                                                                                                  | GHDx ID |
|--------------------|------|-----------|---------------|----------|--------|---------------------------------------------------------------------------------------------------------------------------------------------------------------------------------------------------------------------------------------------------------------------------|---------|
| Dominican Republic | 2013 | CBH       | 18167         | 0        | 524    | Center for Social and Demographic Studies (Dominican Republic) (CESDEM), ICF International, Ministry of Public Health and Social Assistance (Dominican Republic). Dominican Republic Demographic and Health Survey 2013. Fairfax, United States: ICF International, 2014. | 77819   |
| Dominican Republic | 2014 | CBH       | 58946         | 10       | 0      | National Statistics Office (Dominican Republic), United Nations Children's Fund (UNICEF). Dominican Republic Multiple Indicator Cluster Survey 2014. New York, United States: United Nations Children's Fund (UNICEF), 2016.                                              | 200697  |
| Ecuador            | 2001 | SBH       | 615368        | 133      | 0      | National Institute of Statistics and Censuses (Ecuador), Minnesota Population Center. Ecuador Population and Housing Census 2001 from the Integrated Public Use Microdata Series, International: [Machine-readable database]. Minneapolis: University of Minnesota.       | 3549    |
| Ecuador            | 2004 | CBH       | 24696         | 22       | 0      | Center for Studies of Population and Social Development (CEPAR) (Ecuador) and Division of Reproductive Health-Centers for Disease Control and Prevention (CDC). (2005) Ecuador Reproductive Health Survey 2004. Quito, Ecuador: CEPAR.                                    | 27630   |
| Ecuador            | 2005 | SBH       | 28735         | 87       | 285    | National Institute of Statistics and Censuses (Ecuador), Inter-American Development Bank (IDB). Ecuador Living Conditions Survey 2005-2006. Quito, Ecuador: National Institute of Statistics and Censuses (Ecuador).                                                      | 46924   |

| Country | Year | Data Type | Children Born | Polygons | Points | Citation                                                                                                                                                                                                                                                                       | GHDx ID |
|---------|------|-----------|---------------|----------|--------|--------------------------------------------------------------------------------------------------------------------------------------------------------------------------------------------------------------------------------------------------------------------------------|---------|
| Ecuador | 2010 | SBH       | 676039        | 140      | 0      | Minnesota Population Center, National Institute of Statistics and Census (INEC) (Ecuador). Ecuador Population and Housing Census 2010 from the Integrated Public Use Microdata Series, International: [Machine-readable database]. Minneapolis: University of Minnesota, 2013. | 105801  |
| Egypt   | 2000 | CBH       | 54780         | 0        | 997    | Macro International, Inc, Population Council (Egypt). Egypt Demographic and Health Survey 2000. Fairfax, United States: ICF International.                                                                                                                                     | 19511   |
| Egypt   | 2003 | CBH       | 30298         | 0        | 924    | El-Zanaty and Associates, Macro International, Inc, Ministry of Health and Population (Egypt), Population Council (Egypt). Egypt Interim Demographic and Health Survey 2003. Fairfax, United States: ICF International.                                                        | 19529   |
| Egypt   | 2005 | CBH       | 61455         | 0        | 1298   | El-Zanaty and Associates, Macro International, Inc, Ministry of Health and Population (Egypt), Population Council (Egypt). Egypt Demographic and Health Survey 2005. Fairfax, United States: ICF International.                                                                | 19521   |
| Egypt   | 2008 | CBH       | 48619         | 0        | 1244   | El-Zanaty and Associates, Macro International, Inc, Ministry of Health and Population (Egypt). Egypt Demographic and Health Survey 2008. Fairfax, United States: ICF International.                                                                                            | 26842   |
| Egypt   | 2014 | CBH       | 59266         | 0        | 1807   | El-Zanaty and Associates, ICF International, Ministry of Health and Population (Egypt). Egypt Demographic and Health Survey 2014. Fairfax, United States: ICF International.                                                                                                   | 154897  |
| Egypt   | 2015 | SBH       | 16984         | 25       | 0      | El-Zanaty and Associates, ICF International, Ministry of Health and Population (Egypt), Population Council (Egypt). Egypt Special Demographic and Health Survey 2015. Fairfax, United States: ICF International.                                                               | 157026  |

| Country     | Year | Data Type | Children Born | Polygons | Points | Citation                                                                                                                                                                                                                                                                                                                 | GHDx ID |
|-------------|------|-----------|---------------|----------|--------|--------------------------------------------------------------------------------------------------------------------------------------------------------------------------------------------------------------------------------------------------------------------------------------------------------------------------|---------|
| El Salvador | 2003 | CBH       | 24442         | 14       | 0      | Asociacion Demografica Salvadorena (ADS), Division of Reproductive Health-Centers for Disease Control and Prevention (CDC). (2004) El Salvador Reproductive Health Survey 2002-2003. San Salvador, El Salvador: ADS.                                                                                                     | 27599   |
| El Salvador | 2007 | SBH       | 281507        | 103      | 0      | Minnesota Population Center, General Administration of Statistics and Censuses (El Salvador), Ministry of Economy (El Salvador). El Salvador Population and Housing Census 2007 from the Integrated Public Use Microdata Series, International: [Machine-readable database]. Minneapolis: University of Minnesota, 2012. | 56476   |
| El Salvador | 2008 | CBH       | 25228         | 14       | 0      | Asociacion Demografica Salvadorena (ADS), Division of Reproductive Health-Centers for Disease Control and Prevention (CDC). (2009) El Salvador Reproductive Health Survey 2008. San Salvador, El Salvador: ADS.                                                                                                          | 27606   |
| El Salvador | 2014 | CBH       | 24689         | 14       | 0      | General Administration of Statistics and Censuses (El Salvador), Ministry of Health (El Salvador), United Nations Children's Fund (UNICEF). El Salvador Multiple Indicator Cluster Survey 2014. New York, United States: United Nations Children's Fund (UNICEF), 2017.                                                  | 200636  |
| Eritrea     | 2002 | CBH       | 24370         | 6        | 0      | Macro International, Inc, National Statistics and Evaluation Office (Eritrea). Eritrea Demographic and Health Survey 2002. Fairfax, United States: ICF International.                                                                                                                                                    | 19539   |
| Ethiopia    | 2000 | CBH       | 44174         | 0        | 533    | Central Statistical Agency (Ethiopia), ORC Macro. Ethiopia Demographic and Health Survey 2000. Calverton, United States: ORC Macro, 2001.                                                                                                                                                                                | 19571   |

| Country  | Year | Data Type | Children Born | Polygons | Points | Citation                                                                                                                                                                                                                                                  | GHDx ID |
|----------|------|-----------|---------------|----------|--------|-----------------------------------------------------------------------------------------------------------------------------------------------------------------------------------------------------------------------------------------------------------|---------|
| Ethiopia | 2005 | CBH       | 39881         | 0        | 528    | Macro International, Inc, Population and Housing Census Commissions Office (PHCCO). Ethiopia Demographic and Health Survey 2005. Fairfax, United States: ICF International.                                                                               | 19557   |
| Ethiopia | 2011 | CBH       | 45540         | 0        | 571    | Central Statistical Agency (Ethiopia), ICF Macro, Ministry of Health (Ethiopia). Ethiopia Demographic and Health Survey 2010-2011. Fairfax, United States: ICF International.                                                                             | 21301   |
| Ethiopia | 2014 | CBH       | 22036         | 11       | 0      | Central Statistical Agency (Ethiopia), Ministry of Health (Ethiopia), World Bank. Ethiopia Mini Demographic and Health Survey 2014.                                                                                                                       | 153507  |
| Ethiopia | 2016 | CBH       | 41392         | 0        | 622    | Central Statistical Agency (Ethiopia), ICF International. Ethiopia Demographic and Health Survey 2016. Fairfax, United States: ICF International, 2017.                                                                                                   | 218568  |
| Gabon    | 2001 | CBH       | 16878         | 40       | 0      | General Directorate of Statistics and Economic Studies (Gabon), Macro International, Inc. Gabon Demographic and Health Survey 2000-2001. Fairfax, United States: ICF International.                                                                       | 19579   |
| Gabon    | 2012 | CBH       | 23109         | 0        | 331    | General Directorate of Statistics (Gabon), ICF International, Ministry of Economy, Employment and Sustainable Development (Gabon), Ministry of Health (Gabon). Gabon Demographic and Health Survey 2012. Fairfax, United States: ICF International, 2013. | 76706   |
| Ghana    | 2003 | CBH       | 15086         | 0        | 410    | Ghana Statistical Service, Macro International, Inc. Ghana Demographic and Health Survey 2003. Fairfax, United States: ICF International.                                                                                                                 | 19627   |
| Ghana    | 2006 | SBH       | 22705         | 10       | 0      | Ghana Statistical Service. Ghana Living Standards Measurement Survey 2005-2006. Accra, Ghana: Ghana Statistical Service.                                                                                                                                  | 4679    |

| Country | Year | Data Type | Children Born | Polygons | Points | Citation                                                                                                                                                                                                                                                 | GHDx ID |
|---------|------|-----------|---------------|----------|--------|----------------------------------------------------------------------------------------------------------------------------------------------------------------------------------------------------------------------------------------------------------|---------|
| Ghana   | 2006 | SBH       | 15689         | 10       | 0      | Ministry of Health (MOH) (Ghana), Ghana Statistical Service and United Nations Children's Fund (UNICEF). Ghana Multiple Indicator Cluster Survey 2006. New York, United States: United Nations Children's Fund (UNICEF).                                 | 4694    |
| Ghana   | 2008 | CBH       | 25710         | 347      | 0      | Ghana Health Service, Ghana Statistical Service, Macro International, Inc. Ghana Special Demographic and Health Survey 2007-2008. Fairfax, United States: ICF International.                                                                             | 21173   |
| Ghana   | 2008 | CBH       | 11888         | 0        | 404    | Ghana Statistical Service, Macro International, Inc, Ministry of Health (Ghana). Ghana Demographic and Health Survey 2008. Fairfax, United States: ICF International.                                                                                    | 21188   |
| Ghana   | 2008 | CBH       | 34751         | 4        | 0      | Ghana Statistical Service, Ministry of Health (Ghana), United Nations Children's Fund (UNICEF). Ghana District Multiple Indicator Cluster Survey 2007-2008.                                                                                              | 160576  |
| Ghana   | 2010 | SBH       | 1275941       | 169      | 0      | Ghana Statistical Service, Minnesota Population Center. Ghana Census 2010 from the Integrated Public Use Microdata Series, International: [Machine-readable database]. Minneapolis: University of Minnesota.                                             | 151306  |
| Ghana   | 2011 | SBH       | 2016          | 0        | 5      | Institute of Statistical, Social and Economic Research, University of Ghana, United Nations Children's Fund (UNICEF). Ghana - Accra Multiple Indicator Cluster Survey 2010-2011. New York, United States: United Nations Children's Fund (UNICEF), 2014. | 56241   |

| Country   | Year | Data Type | Children Born | Polygons | Points | Citation                                                                                                                                                                                                                                                                                                                                                                                                                                     | GHDx ID |
|-----------|------|-----------|---------------|----------|--------|----------------------------------------------------------------------------------------------------------------------------------------------------------------------------------------------------------------------------------------------------------------------------------------------------------------------------------------------------------------------------------------------------------------------------------------------|---------|
| Ghana     | 2011 | CBH       | 31145         | 0        | 741    | Centers for Disease Control and Prevention (CDC), Ghana Statistical Service, Government of Japan, ICF Macro, Ministry of Health (Ghana), Navrongo Health Research Centre, United Nations Children's Fund (UNICEF), United Nations Population Fund (UNFPA), United States Agency for International Development (USAID). Ghana Multiple Indicator Cluster Survey 2011. New York, United States: United Nations Children's Fund (UNICEF), 2013. | 63993   |
| Ghana     | 2013 | SBH       | 40591         | 10       | 0      | Ghana Statistical Service, World Bank. Ghana Living Standards Measurement Survey 2012-2013. Accra, Ghana: Ghana Statistical Service.                                                                                                                                                                                                                                                                                                         | 165101  |
| Ghana     | 2014 | CBH       | 23118         | 0        | 424    | Ghana Health Service, Ghana Statistical Service, ICF International. Ghana Demographic and Health Survey 2014. Fairfax, United States: ICF International, 2016.                                                                                                                                                                                                                                                                               | 157027  |
| Ghana     | 2016 | SBH       | 13050         | 0        | 192    | Ghana Health Service, Ghana Statistical Service, ICF International, National Malaria Control Program (Ghana), National Public Health and Reference Laboratory (NHPRL)(Ghana). Ghana Malaria Indicator Survey 2016. Fairfax, United States: ICF International.                                                                                                                                                                                | 286788  |
| Ghana     | 2017 | CBH       | 59198         | 0        | 897    | Ghana Health Service, Ghana Statistical Service, ICF International. Ghana Special Demographic and Health Survey 2017. Fairfax, United States: ICF International, 2018.                                                                                                                                                                                                                                                                       | 218572  |
| Guatemala | 2002 | CBH       | 28731         | 373      | 370    | Guatemala Ministry of Health and Social Assistance, University of Valle, Division of Reproductive Health-Centers for Disease Control and Prevention (CDC). (2003) Guatemala Reproductive Health Survey 2002. Atlanta, United States: Centers for Disease Control and Prevention (CDC).                                                                                                                                                       | 27563   |

| Country   | Year | Data Type | Children Born | Polygons | Points | Citation                                                                                                                                                                                                                                                                                                                                                             | GHDx ID |
|-----------|------|-----------|---------------|----------|--------|----------------------------------------------------------------------------------------------------------------------------------------------------------------------------------------------------------------------------------------------------------------------------------------------------------------------------------------------------------------------|---------|
| Guatemala | 2009 | CBH       | 45017         | 22       | 0      | Guatemala Ministry of Health and Social Assistance, University of Valle and Division of Reproductive Health-Centers for Disease Control and Prevention (CDC). Guatemala Reproductive Health Survey 2008-2009. Atlanta, United States: Centers for Disease Control and Prevention (CDC).                                                                              | 4779    |
| Guatemala | 2011 | SBH       | 37495         | 21       | 0      | National Statistics Institute (Guatemala). Guatemala National Survey of Living Conditions 2011. Guatemala City, Guatemala: National Statistics Institute (Guatemala).                                                                                                                                                                                                | 352625  |
| Guatemala | 2015 | CBH       | 55398         | 0        | 853    | ICF International, Institute of Nutrition of Central America and Panama, Ministry of Public Health and Social Assistance (Guatemala), National Statistics Institute (Guatemala), Secretary of Planning and Programming of the Presidency (Segeplan) (Guatemala). Guatemala Demographic and Health Survey 2014-2015. Fairfax, United States: ICF International, 2017. | 157031  |
| Guinea    | 2005 | CBH       | 27115         | 0        | 291    | Macro International, Inc, National Statistics Directorate (Guinea). Guinea Demographic and Health Survey 2005. Fairfax, United States: ICF International.                                                                                                                                                                                                            | 19683   |
| Guinea    | 2012 | CBH       | 27683         | 0        | 300    | ICF Macro, Ministry of Health and Public Hygiene (Guinea), National Institute of Statistics (Guinea). Guinea Demographic and Health Survey 2012. Fairfax, United States: ICF International.                                                                                                                                                                          | 69761   |
| Guinea    | 2016 | CBH       | 27046         | 6        | 0      | National Institute of Public Health (NPHI) (Guinea), National Institute of Statistics (Guinea), National Malaria Control Program (Guinea), United Nations Children's Fund (UNICEF). Guinea Multiple Indicator Cluster Survey 2016. New York, United States: United Nations Children's Fund (UNICEF), 2018.                                                           | 303458  |

| Country       | Year | Data Type | Children Born | Polygons | Points | Citation                                                                                                                                                                                                                                               | GHDx ID |
|---------------|------|-----------|---------------|----------|--------|--------------------------------------------------------------------------------------------------------------------------------------------------------------------------------------------------------------------------------------------------------|---------|
| Guinea-Bissau | 2006 | SBH       | 24016         | 9        | 0      | United Nations Children's Fund (UNICEF), Government of Guinea-Bissau. Guinea-Bissau Multiple Indicator Cluster Survey 2006. New York, United States: United Nations Children's Fund (UNICEF).                                                          | 4818    |
| Guinea-Bissau | 2014 | CBH       | 27607         | 9        | 0      | National Statistics Institute (Guinea-Bissau), United Nations Children's Fund (UNICEF). Guinea-Bissau Multiple Indicator Cluster Survey 2014. New York, United States: United Nations Children's Fund (UNICEF), 2016.                                  | 174049  |
| Guyana        | 2000 | SBH       | 11691         | 10       | 0      | Bureau of Statistics (Guyana), United Nations Children's Fund (UNICEF). Guyana Multiple Indicator Cluster Survey 2000. New York, United States: United Nations Children's Fund (UNICEF)                                                                | 4916    |
| Guyana        | 2005 | CBH       | 4923          | 9        | 0      | Central Bureau of Statistics (Ghana), Guyana Responsible Parenthood Association (GRPA), Ministry of Health (Guyana), ORC Macro, Pan American Health Organization (PAHO). Guyana AIDS Indicator Survey 2005. Fairfax, United States: ICF International. | 4837    |
| Guyana        | 2007 | SBH       | 12157         | 10       | 0      | United Nations Children's Fund (UNICEF), Bureau of Statistics (Guyana). Guyana Multiple Indicator Cluster Survey 2006. New York, United States: United Nations Children's Fund (UNICEF).                                                               | 4926    |
| Guyana        | 2009 | CBH       | 10929         | 0        | 312    | Bureau of Statistics (Guyana), ICF Macro, Ministry of Health (Guyana). Guyana Demographic and Health Survey 2009. Fairfax, United States: ICF International, 2011.                                                                                     | 21348   |
| Guyana        | 2014 | CBH       | 11161         | 10       | 0      | Bureau of Statistics (Guyana), Ministry of Health (Guyana), United Nations Children's Fund (UNICEF). Guyana Multiple Indicator Cluster Survey 2014. New York, United States: United                                                                    | 200598  |



| Country | Year | Data Type | Children Born | Polygons | Points | Citation                                                                                                                                                                                                                                                       | GHDx ID |
|---------|------|-----------|---------------|----------|--------|----------------------------------------------------------------------------------------------------------------------------------------------------------------------------------------------------------------------------------------------------------------|---------|
|         |      |           |               |          |        | Nations Children's Fund (UNICEF), 2016.                                                                                                                                                                                                                        |         |
| Haiti   | 2000 | CBH       | 26437         | 0        | 317    | Haitian Institute of Childhood (IHE), Macro International, Inc. Haiti Demographic and Health Survey 2000. Fairfax, United States: ICF International.                                                                                                           | 19708   |
| Haiti   | 2003 | SBH       | 439200        | 42       | 0      | Minnesota Population Center, Haitian Institute of Statistics and Informatics. Haiti Population and Housing Census 2003 from the Integrated Public Use Microdata Series, International: [Machine-readable database]. Minneapolis: University of Minnesota, 2013 | 106473  |
| Haiti   | 2006 | CBH       | 24830         | 0        | 333    | Haitian Institute of Childhood (IHE), Haitian Institute of Statistics and Informatics, Macro International, Inc. Haiti Demographic and Health Survey 2005-2006. Fairfax, United States: ICF International.                                                     | 19720   |
| Haiti   | 2008 | CBH       | 4711          | 9        | 0      | Global Fund to Fight Aids Tuberculosis and Malaria (GFATM). Haiti Global Fund Household Survey 2008.                                                                                                                                                           | 26680   |
| Haiti   | 2012 | CBH       | 29013         | 0        | 438    | Centers for Disease Control and Prevention (CDC), Haitian Institute of Childhood (IHE), Haitian Institute of Statistics and Informatics, Macro International, Inc. Haiti Demographic and Health Survey 2012. Fairfax, United States: ICF International.        | 65118   |
| Haiti   | 2016 | CBH       | 27809         | 10       | 450    | Haitian Institute of Childhood (IHE), Haitian Institute of Statistics and Informatics, ICF International, Ministry of Public Health and Population (Haiti). Haiti Demographic and Health Survey 2016-2017. Fairfax, United States: ICF International.          | 218574  |

| Country  | Year | Data Type | Children Born | Polygons | Points | Citation                                                                                                                                                                                                                                                                                                   | GHDx ID |
|----------|------|-----------|---------------|----------|--------|------------------------------------------------------------------------------------------------------------------------------------------------------------------------------------------------------------------------------------------------------------------------------------------------------------|---------|
| Honduras | 2001 | CBH       | 23535         | 16       | 0      | Honduras Family Planning Association (ASHONPLAFA), Ministry of Health (Honduras), and Division of Reproductive Health-Centers for Disease Control and Prevention (CDC). Honduras Reproductive Health Survey 2001. Tegucigalpa, Honduras: Honduras Family Planning Association (ASHONPLAFA).                | 27551   |
| Honduras | 2001 | SBH       | 343847        | 111      | 0      | National Institute of Statistics (Honduras), Minnesota Population Center. Honduras Population and Housing Census 2001 from the Integrated Public Use Microdata Series, International. Minneapolis, MN: IPUMS, 2018.<br><a href="https://doi.org/10.18128/D020.V7.1">https://doi.org/10.18128/D020.V7.1</a> | 367563  |
| Honduras | 2004 | SBH       | 21811         | 18       | 0      | National Institute of Statistics (Honduras). Honduras Survey of Living Conditions 2004. Tegucigalpa, Honduras: National Institute of Statistics (Honduras).                                                                                                                                                | 5009    |
| Honduras | 2006 | CBH       | 50093         | 16       | 0      | Macro International, Inc, National Institute of Statistics (Honduras), Secretary of Health (Honduras). Honduras Demographic and Health Survey 2005-2006. Fairfax, United States: ICF International.                                                                                                        | 19728   |
| Honduras | 2012 | CBH       | 49263         | 0        | 1127   | ICF Macro, National Institute of Statistics (Honduras). Honduras Demographic and Health Survey 2011-2012. Fairfax, United States: ICF International.                                                                                                                                                       | 95440   |
| India    | 2000 | CBH       | 268879        | 26       | 0      | International Institute for Population Sciences (India), Macro International, Inc. India Demographic and Health Survey 1998-1999. Calverton, United States: Macro International, Inc.                                                                                                                      | 19950   |

| Country   | Year | Data Type | Children Born | Polygons | Points | Citation                                                                                                                                                                                                                   | GHDx ID             |
|-----------|------|-----------|---------------|----------|--------|----------------------------------------------------------------------------------------------------------------------------------------------------------------------------------------------------------------------------|---------------------|
| India     | 2004 | SBH       | 1391228       | 585      | 0      | International Institute for Population Sciences (India). India District Level Household Survey 2002-2005. Mumbai, India: International Institute for Population Sciences (India).                                          | 23219 <sup>†</sup>  |
| India     | 2006 | CBH       | 256782        | 29       | 0      | International Institute for Population Sciences (India), Macro International, Inc. India Demographic and Health Survey 2005-2006. Fairfax, United States: ICF International.                                               | 19963               |
| India     | 2008 | SBH       | 1818042       | 590      | 0      | International Institute for Population Sciences (India). India District Level Household Survey 2007-2008. Mumbai, India: International Institute for Population Sciences (India), 2010.                                    | 23258 <sup>†</sup>  |
| India     | 2013 | SBH       | 31956497      | 277      | 0      | Office of the Registrar General and Census Commissioner (India). India Annual Health Survey Data 2010-2013.                                                                                                                | 234353 <sup>†</sup> |
| India     | 2014 | SBH       | 259034        | 275      | 0      | International Institute for Population Sciences (India). India District Level Household Survey 2012-2014. New Delhi, India: Ministry of Health and Family Welfare (India).                                                 | 165390              |
| India     | 2016 | CBH       | 1315617       | 82       | 28387  | ICF International, International Institute for Population Sciences (India), Ministry of Health and Family Welfare (India). India Demographic and Health Survey 2015-2016. Fairfax, United States: ICF International, 2018. | 157050              |
| Indonesia | 2001 | SBH       | 458846        | 6        | 9488   | Central Bureau of Statistics (Indonesia), Ministry of Health (Indonesia), World Bank. Indonesia National Socioeconomic Survey 2001.                                                                                        | 6842                |
| Indonesia | 2002 | SBH       | 432996        | 6        | 9009   | Statistics Indonesia. Indonesia National Socioeconomic Survey 2002.                                                                                                                                                        | 43510               |
| Indonesia | 2003 | SBH       | 449842        | 37       | 0      | Statistics Indonesia. Indonesia National Socioeconomic Survey 2003.                                                                                                                                                        | 6874                |

| Country   | Year | Data Type | Children Born | Polygons | Points | Citation                                                                                                                                                                                                                               | GHDx ID |
|-----------|------|-----------|---------------|----------|--------|----------------------------------------------------------------------------------------------------------------------------------------------------------------------------------------------------------------------------------------|---------|
| Indonesia | 2003 | CBH       | 79791         | 0        | 1318   | Macro International, Inc, Ministry of Health (Indonesia), National Family Planning Coordinating Board (Indonesia), Statistics Indonesia. Indonesia Demographic and Health Survey 2002-2003. Fairfax, United States: ICF International. | 20011   |
| Indonesia | 2004 | SBH       | 501844        | 6        | 10427  | Statistics Indonesia. Indonesia National Socioeconomic Survey 2004.                                                                                                                                                                    | 6904    |
| Indonesia | 2005 | SBH       | 510692        | 5        | 11494  | Statistics Indonesia. Indonesia National Socioeconomic Survey 2005.                                                                                                                                                                    | 5376    |
| Indonesia | 2006 | SBH       | 545163        | 84       | 12575  | Statistics Indonesia. Indonesia National Socioeconomic Survey 2006.                                                                                                                                                                    | 5401    |
| Indonesia | 2007 | SBH       | 582333        | 92       | 12521  | Statistics Indonesia. Indonesia National Socioeconomic Survey 2007.                                                                                                                                                                    | 6970    |
| Indonesia | 2007 | CBH       | 84726         | 33       | 0      | Macro International, Inc, Ministry of Health (Indonesia), National Family Planning Coordinating Board (Indonesia), Statistics Indonesia. Indonesia Demographic and Health Survey 2007. Fairfax, United States: ICF International.      | 20021   |
| Indonesia | 2008 | SBH       | 131645        | 99       | 3400   | Statistics Indonesia. Indonesia National Socioeconomic Survey 2008.                                                                                                                                                                    | 43526   |
| Indonesia | 2009 | SBH       | 129963        | 93       | 3355   | Statistics Indonesia. Indonesia National Socioeconomic Survey 2009.                                                                                                                                                                    | 43552   |
| Indonesia | 2010 | SBH       | 125345        | 98       | 3318   | Statistics Indonesia. Indonesia National Socioeconomic Survey 2010.                                                                                                                                                                    | 30235   |
| Indonesia | 2010 | SBH       | 10489232      | 485      | 0      | Minnesota Population Center, Statistics Indonesia. Indonesia Population Census 2010 from the Integrated Public Use Microdata Series, International: [Machine-readable database]. Minneapolis: University of Minnesota, 2012.           | 56558   |
| Indonesia | 2011 | SBH       | 130728        | 103      | 5685   | Statistics Indonesia. Indonesia National Socioeconomic Survey 2011.                                                                                                                                                                    | 85265   |

| Country   | Year | Data Type | Children Born | Polygons | Points | Citation                                                                                                                                                                                                                                                                                                 | GHDx ID |
|-----------|------|-----------|---------------|----------|--------|----------------------------------------------------------------------------------------------------------------------------------------------------------------------------------------------------------------------------------------------------------------------------------------------------------|---------|
| Indonesia | 2011 | SBH       | 6028          | 3        | 0      | Ministry of Home Affairs (Indonesia), National Development Planning Agency (BAPPENAS) (Indonesia), Statistics Indonesia, United Nations Children's Fund (UNICEF). Indonesia - West Papua Multiple Indicator Cluster Survey 2011. New York, United States: United Nations Children's Fund (UNICEF), 2013. | 104042  |
| Indonesia | 2011 | SBH       | 6246          | 3        | 0      | Ministry of Home Affairs (Indonesia), National Development Planning Agency (BAPPENAS) (Indonesia), Statistics Indonesia, United Nations Children's Fund (UNICEF). Indonesia - Papua Multiple Indicator Cluster Survey 2011. New York, United States: United Nations Children's Fund (UNICEF), 2013.      | 104043  |
| Indonesia | 2012 | CBH       | 83650         | 33       | 0      | ICF International, Ministry of Health (Indonesia), National Population and Family Planning Board (Indonesia), Statistics Indonesia. Indonesia Demographic and Health Survey 2012. Fairfax, United States: ICF International.                                                                             | 76705   |
| Indonesia | 2012 | SBH       | 534256        | 497      | 0      | Central Bureau of Statistics (Indonesia). Indonesia National Socioeconomic Survey 2012. Jakarta, Indonesia: Central Bureau of Statistics (Indonesia).                                                                                                                                                    | 150884  |
| Indonesia | 2013 | SBH       | 518178        | 497      | 0      | Statistics Indonesia. Indonesia National Socioeconomic Survey 2013. Jakarta, Indonesia: Statistics Indonesia.                                                                                                                                                                                            | 151184  |
| Indonesia | 2014 | SBH       | 517089        | 445      | 0      | Statistics Indonesia. Indonesia National Socioeconomic Survey 2014.                                                                                                                                                                                                                                      | 165186  |
| Indonesia | 2015 | CBH       | 1228790       | 476      | 0      | Statistics Indonesia. Indonesia Intercensal Population Survey 2015.                                                                                                                                                                                                                                      | 237943  |
| Indonesia | 2015 | SBH       | 493641        | 449      | 0      | Statistics Indonesia. Indonesia National Socioeconomic Survey 2015.                                                                                                                                                                                                                                      | 238332  |
| Indonesia | 2016 | SBH       | 483674        | 450      | 0      | Statistics Indonesia. Indonesia National Socioeconomic Survey 2016.                                                                                                                                                                                                                                      | 282087  |

| Country   | Year | Data Type | Children Born | Polygons | Points | Citation                                                                                                                                                                                                                                                                                              | GHDx ID |
|-----------|------|-----------|---------------|----------|--------|-------------------------------------------------------------------------------------------------------------------------------------------------------------------------------------------------------------------------------------------------------------------------------------------------------|---------|
| Indonesia | 2017 | SBH       | 487604        | 34       | 0      | Central Bureau of Statistics (Indonesia). Indonesia National Socioeconomic Survey 2017. Jakarta, Indonesia: Central Bureau of Statistics (Indonesia), 2018.                                                                                                                                           | 395694  |
| Iran      | 2006 | SBH       | 632125        | 333      | 0      | Statistical Centre of Iran, Minnesota Population Center. Iran General Census of Population and Housing 2006 from the Integrated Public Use Microdata Series, International: Version 6.1 [Machine-readable database]. Minneapolis: University of Minnesota, 2011.                                      | 39396   |
| Iran      | 2011 | SBH       | 624428        | 396      | 0      | Statistical Centre of Iran. Iran National Population and Housing Census 2011. Tehran, Iran: Statistical Centre of Iran.                                                                                                                                                                               | 81291   |
| Iran      | 2016 | SBH       | 608289        | 429      | 0      | Statistical Centre of Iran. Iran Population and Housing Census 2016.                                                                                                                                                                                                                                  | 299134  |
| Iraq      | 2006 | CBH       | 62359         | 18       | 0      | United Nations Children's Fund (UNICEF), Central Organization for Statistics and Information Technology (Iraq), Kurdistan Regional Statistics Office. Iraq Multiple Indicator Cluster Survey 2006. New York, United States: United Nations Children's Fund (UNICEF).                                  | 7028    |
| Iraq      | 2007 | SBH       | 34284         | 18       | 0      | Ministry of Health (Iraq), Central Organization for Statistics and Information Technology (Iraq), Kurdistan Regional Statistics Office, World Health Organization (WHO), Ministry of Health (Kurdistan). Iraq Family Health Survey 2006-2007.                                                         | 23429   |
| Iraq      | 2011 | CBH       | 136878        | 48       | 0      | Central Organization for Statistics and Information Technology (Iraq), Kurdistan Regional Statistics Office, Ministry of Health (Iraq), United Nations Children's Fund (UNICEF). Iraq Multiple Indicator Cluster Survey 2011. New York, United States: United Nations Children's Fund (UNICEF), 2013. | 76707   |

| Country | Year | Data Type | Children Born | Polygons | Points | Citation                                                                                                                                                                                                                                                                                    | GHDx ID |
|---------|------|-----------|---------------|----------|--------|---------------------------------------------------------------------------------------------------------------------------------------------------------------------------------------------------------------------------------------------------------------------------------------------|---------|
| Jamaica | 2001 | SBH       | 93846         | 14       | 0      | Statistical Institute of Jamaica (STATIN), Minnesota Population Center. Jamaica Population Census 2001 from the Integrated Public Use Microdata Series, International: [Machine-readable database]. Minneapolis: University of Minnesota, 2011.                                             | 39450   |
| Jamaica | 2005 | SBH       | 7206          | 14       | 0      | Statistical Institute of Jamaica (STATIN) and United Nations Children's Fund (UNICEF). Jamaica Multiple Indicator Cluster Survey 2005. New York, United States: United Nations Children's Fund (UNICEF).                                                                                    | 7149    |
| Jordan  | 2002 | CBH       | 25296         | 0        | 495    | Department of Statistics (Jordan), Macro International, Inc. Jordan Demographic and Health Survey 2002. Fairfax, United States: ICF International.                                                                                                                                          | 20073   |
| Jordan  | 2007 | CBH       | 43460         | 0        | 924    | Department of Statistics (Jordan), Macro International, Inc. Jordan Demographic and Health Survey 2007. Fairfax, United States: ICF International.                                                                                                                                          | 20083   |
| Jordan  | 2009 | CBH       | 38199         | 12       | 0      | Department of Statistics (Jordan), ICF Macro. Jordan Interim Demographic and Health Survey 2009. Fairfax, United States: ICF International, 2010.                                                                                                                                           | 21206   |
| Jordan  | 2012 | CBH       | 42275         | 0        | 806    | Department of Statistics (Jordan), ICF International. Jordan Demographic and Health Survey 2012. Fairfax, United States: ICF International.                                                                                                                                                 | 77517   |
| Kenya   | 2003 | CBH       | 22074         | 0        | 399    | Centers for Disease Control and Prevention (CDC), Central Bureau of Statistics (Kenya), Macro International, Inc, Ministry of Health (Kenya), National Council for Population and Development (Kenya). Kenya Demographic and Health Survey 2003. Fairfax, United States: ICF International. | 20145   |

| Country | Year | Data Type | Children Born | Polygons | Points | Citation                                                                                                                                                                                                                                                                                                                                                                                                                                                                                                                                                                                       | GHDx ID            |
|---------|------|-----------|---------------|----------|--------|------------------------------------------------------------------------------------------------------------------------------------------------------------------------------------------------------------------------------------------------------------------------------------------------------------------------------------------------------------------------------------------------------------------------------------------------------------------------------------------------------------------------------------------------------------------------------------------------|--------------------|
| Kenya   | 2006 | SBH       | 37588         | 0        | 1339   | Central Bureau of Statistics (Kenya), UK Department for International Development (DFID), United States Agency for International Development (USAID), European Union (EU), Danish International Development Agency (DANIDA), World Bank (WB), United Nations Development Programme (UNDP). Kenya Integrated Household Budget Survey 2005-2006. Nairobi, Kenya: Central Bureau of Statistics (Kenya).                                                                                                                                                                                           | 7375 <sup>†</sup>  |
| Kenya   | 2007 | SBH       | 14769         | 0        | 383    | Centers for Disease Control and Prevention (CDC), KEMRI Wellcome Trust Research Programme (KWTRP), Kenya National Bureau of Statistics, Ministry of Public Health and Sanitation (Kenya), National Coordinating Agency for Population and Development (Kenya), Population Services International (PSI). Kenya Malaria Indicator Survey 2007.                                                                                                                                                                                                                                                   | 57990 <sup>†</sup> |
| Kenya   | 2007 | SBH       | 26279         | 0        | 387    | Centers for Disease Control and Prevention (CDC), Kenya Medical Research Institute (KEMRI), Kenya National Bureau of Statistics, Ministry of Public Health and Sanitation (Kenya), National AIDS Control Council (Kenya), National AIDS and STI Control Program (Kenya), National Coordinating Agency for Population and Development (Kenya), National Public Health Laboratory Services, Ministry of Public Health and Sanitation (Kenya), United States Agency for International Development (USAID). Kenya AIDS Indicator Survey 2007. Nairobi, Kenya: Kenya National Bureau of Statistics. | 133219             |



| Country | Year | Data Type | Children Born | Polygons | Points | Citation                                                                                                                                                                                                                                                                                                                                                                                                  | GHDx ID |
|---------|------|-----------|---------------|----------|--------|-----------------------------------------------------------------------------------------------------------------------------------------------------------------------------------------------------------------------------------------------------------------------------------------------------------------------------------------------------------------------------------------------------------|---------|
| Kenya   | 2007 | SBH       | 4036          | 0        | 76     | Kenya National Bureau of Statistics, United Nations Children's Fund (UNICEF). Kenya - North Eastern Province Multiple Indicator Cluster Survey 2007. Nairobi, Kenya: Kenya National Bureau of Statistics.                                                                                                                                                                                                 | 155335  |
| Kenya   | 2008 | CBH       | 41800         | 0        | 590    | Kenya National Bureau of Statistics, United Nations Children's Fund (UNICEF). Kenya - Eastern Province Multiple Indicator Cluster Survey 2008. Nairobi, Kenya: Kenya National Bureau of Statistics.                                                                                                                                                                                                       | 7401    |
| Kenya   | 2009 | CBH       | 22534         | 0        | 397    | ICF Macro, Kenya Medical Research Institute (KEMRI), Kenya National Bureau of Statistics, Ministry of Public Health and Sanitation (Kenya), National AIDS and STI Control Programme (NASCO) (Kenya), National Aids Control Council (NACC), National Coordinating Agency for Population and Development (Kenya). Kenya Demographic and Health Survey 2008-2009. Fairfax, United States: ICF International. | 21365   |
| Kenya   | 2009 | SBH       | 2388668       | 158      | 0      | Minnesota Population Center, Kenya National Bureau of Statistics. Kenya Population Census 2009 from the Integrated Public Use Microdata Series, International: [Machine-readable database]. Minneapolis: University of Minnesota, 2013.                                                                                                                                                                   | 106512  |
| Kenya   | 2011 | CBH       | 18631         | 0        | 289    | Kenya National Bureau of Statistics, United Nations Children's Fund (UNICEF). Kenya - Nyanza Province Multiple Indicator Cluster Survey 2011. Nairobi, Kenya: Kenya National Bureau of Statistics.                                                                                                                                                                                                        | 135416  |

| Country    | Year | Data Type | Children Born | Polygons | Points | Citation                                                                                                                                                                                                                                                                                                           | GHDx ID |
|------------|------|-----------|---------------|----------|--------|--------------------------------------------------------------------------------------------------------------------------------------------------------------------------------------------------------------------------------------------------------------------------------------------------------------------|---------|
| Kenya      | 2014 | CBH       | 83591         | 0        | 1585   | ICF International, Kenya Medical Research Institute (KEMRI), Kenya National Bureau of Statistics, Ministry of Health (Kenya), National AIDS Control Council (Kenya), National Council for Population and Development (Kenya). Kenya Demographic and Health Survey 2014. Fairfax, United States: ICF International. | 157057  |
| Kenya      | 2015 | SBH       | 14087         | 0        | 245    | ICF International, Kenya National Bureau of Statistics, National Malaria Control Program (NMCP) (Kenya). Kenya Malaria Indicator Survey 2015. Fairfax, United States: ICF International, 2015.                                                                                                                     | 218579  |
| Kyrgyzstan | 2006 | SBH       | 12820         | 8        | 0      | United Nations Children's Fund (UNICEF), National Statistical Committee of the Kyrgyz Republic. Kyrgyzstan Multiple Indicator Cluster Survey 2005-2006. New York, United States: United Nations Children's Fund (UNICEF).                                                                                          | 7540    |
| Kyrgyzstan | 2009 | SBH       | 280046        | 56       | 0      | Minnesota Population Center, National Statistical Committee of the Kyrgyz Republic. Kyrgyzstan Population and Housing Census 2009 from the Integrated Public Use Microdata Series, International: [Machine-readable database]. Minneapolis: University of Minnesota, 2013.                                         | 106520  |
| Kyrgyzstan | 2012 | CBH       | 16180         | 0        | 314    | ICF International, Ministry of Health (Kyrgyzstan), National Statistical Committee of the Kyrgyz Republic. Kyrgyzstan Demographic and Health Survey 2012. Fairfax, United States: ICF International.                                                                                                               | 77518   |

| Country    | Year | Data Type | Children Born | Polygons | Points | Citation                                                                                                                                                                                                                                                                                  | GHDx ID |
|------------|------|-----------|---------------|----------|--------|-------------------------------------------------------------------------------------------------------------------------------------------------------------------------------------------------------------------------------------------------------------------------------------------|---------|
| Kyrgyzstan | 2014 | CBH       | 14527         | 9        | 0      | National Statistical Committee of the Kyrgyz Republic, United Nations Children's Fund (UNICEF). Kyrgyzstan Multiple Indicator Cluster Survey 2014. New York, United States: United Nations Children's Fund (UNICEF), 2015.                                                                | 162283  |
| Laos       | 2012 | CBH       | 56802         | 17       | 0      | Ministry of Education and Sports (Laos), Ministry of Health (Laos), Ministry of Planning and Investment (Laos). Laos Multiple Indicator Cluster Survey 2011-2012. New York, United States: United Nations Children's Fund (UNICEF), 2013.                                                 | 103973  |
| Laos       | 2017 | CBH       | 54163         | 18       | 0      | Lao Statistics Bureau, Ministry of Education and Sports (Laos), Ministry of Health (Laos), United Nations Children's Fund (UNICEF). Laos Multiple Indicator Cluster Survey 2017. New York, United States: United Nations Children's Fund (UNICEF), 2018.                                  | 375362  |
| Lesotho    | 2005 | CBH       | 14708         | 0        | 381    | Bureau of Statistics (Lesotho), Macro International, Inc, Ministry of Health and Social Welfare (Lesotho). Lesotho Demographic and Health Survey 2004-2005. Fairfax, United States: ICF International.                                                                                    | 20167   |
| Lesotho    | 2006 | SBH       | 84487         | 63       | 0      | Bureau of Statistics (Lesotho), Minnesota Population Center. Lesotho Population and Housing Census 2006 from the Integrated Public Use Microdata Series, International. Minneapolis, MN: IPUMS, 2018. <a href="https://doi.org/10.18128/D020.V7.1">https://doi.org/10.18128/D020.V7.1</a> | 367585  |
| Lesotho    | 2010 | CBH       | 14429         | 0        | 395    | ICF Macro, Ministry of Health and Social Welfare (Lesotho). Lesotho Demographic and Health Survey 2009-2010. Fairfax, United States: ICF International.                                                                                                                                   | 21382   |
| Lesotho    | 2014 | CBH       | 11710         | 0        | 399    | ICF International, Ministry of Health and Social Welfare (Lesotho). Lesotho Demographic and Health Survey 2014.                                                                                                                                                                           | 157058  |

| Country | Year | Data Type | Children Born | Polygons | Points | Citation                                                                                                                                                                                                                                                                         | GHDx ID |
|---------|------|-----------|---------------|----------|--------|----------------------------------------------------------------------------------------------------------------------------------------------------------------------------------------------------------------------------------------------------------------------------------|---------|
|         |      |           |               |          |        | Fairfax, United States: ICF International.                                                                                                                                                                                                                                       |         |
| Liberia | 2007 | CBH       | 22123         | 0        | 291    | Liberia Institute for Statistics and Geo-information Services (LISGIS), Macro International, Inc. Liberia Demographic and Health Survey 2006-2007. Fairfax, United States: ICF International.                                                                                    | 20191   |
| Liberia | 2008 | SBH       | 209401        | 47       | 0      | Liberia Institute for Statistics and Geo-information Services (LISGIS), Minnesota Population Center. Liberia Census 2008 from the Integrated Public Use Microdata Series, International: [Machine-readable database]. Minneapolis: University of Minnesota.                      | 151310  |
| Liberia | 2009 | CBH       | 14872         | 0        | 150    | ICF Macro, Liberia Institute for Statistics and Geo-information Services (LISGIS), National Malaria Control Program (Liberia). Liberia Malaria Indicator Survey 2008-2009. Fairfax, United States: ICF International.                                                            | 34279   |
| Liberia | 2011 | SBH       | 13917         | 0        | 150    | ICF International, Liberia Institute for Statistics and Geo-information Services (LISGIS), National Malaria Control Program (Liberia). Liberia Malaria Indicator Survey 2011. Fairfax, United States: ICF International, 2012.                                                   | 56828   |
| Liberia | 2013 | CBH       | 30804         | 0        | 322    | ICF International, Liberia Institute for Statistics and Geo-information Services (LISGIS), National AIDS and STI Control Program (NACP), Ministry of Health and Social Welfare (Liberia). Liberia Demographic and Health Survey 2013. Fairfax, United States: ICF International. | 77385   |
| Liberia | 2016 | SBH       | 13869         | 0        | 150    | ICF International, Liberia Institute for Statistics and Geo-information Services (LISGIS), National Malaria Control Program (Liberia). Liberia Malaria Indicator Survey 2016. Fairfax, United States: ICF International, 2017.                                                   | 286768  |

| Country    | Year | Data Type | Children Born | Polygons | Points | Citation                                                                                                                                                                                                                                                                | GHDx ID |
|------------|------|-----------|---------------|----------|--------|-------------------------------------------------------------------------------------------------------------------------------------------------------------------------------------------------------------------------------------------------------------------------|---------|
| Libya      | 2007 | CBH       | 49554         | 22       | 0      | League of Arab States, National Center for Disease Control (Libya), Pan Arab Project for Family Health (PAPFAM). Libya Family Health Survey 2007.                                                                                                                       | 107340  |
| Madagascar | 2004 | CBH       | 20799         | 6        | 0      | Macro International, Inc, National Institute of Statistics (Madagascar). Madagascar Demographic and Health Survey 2003-2004. Fairfax, United States: ICF International.                                                                                                 | 20223   |
| Madagascar | 2009 | CBH       | 48464         | 0        | 585    | ICF Macro, National Institute of Statistics (Madagascar). Madagascar Demographic and Health Survey 2008-2009. Fairfax, United States: ICF International.                                                                                                                | 21409   |
| Madagascar | 2011 | SBH       | 23462         | 0        | 266    | ICF International, National Institute of Statistics (Madagascar), National Program for the Fight Against Malaria (PNLP) (Madagascar), Pasteur Institute of Madagascar (IPM). Madagascar Malaria Indicator Survey 2011. Fairfax, United States: ICF International.       | 69806   |
| Madagascar | 2012 | CBH       | 9956          | 0        | 127    | National Institute of Statistics (Madagascar), United Nations Children's Fund (UNICEF). Madagascar - South Multiple Indicator Cluster Survey 2012. New York, United States: United Nations Children's Fund (UNICEF), 2015.                                              | 125594  |
| Madagascar | 2013 | SBH       | 22075         | 0        | 274    | ICF International, National Institute of Statistics (Madagascar), National Program for the Fight Against Malaria (PNLP) (Madagascar), Pasteur Institute of Madagascar (IPM). Madagascar Malaria Indicator Survey 2013. Fairfax, United States: ICF International, 2013. | 111438  |

| Country    | Year | Data Type | Children Born | Polygons | Points | Citation                                                                                                                                                                                                                                                                                                        | GHDx ID |
|------------|------|-----------|---------------|----------|--------|-----------------------------------------------------------------------------------------------------------------------------------------------------------------------------------------------------------------------------------------------------------------------------------------------------------------|---------|
| Madagascar | 2016 | SBH       | 27819         | 22       | 0      | ICF International, Ministry of Public Health (Madagascar), National Institute of Statistics (Madagascar), National Program for the Fight Against Malaria (PNLP) (Madagascar), Pasteur Institute of Madagascar (IPM). Madagascar Malaria Indicator Survey 2016. Fairfax, United States: ICF International, 2017. | 218580  |
| Malawi     | 2000 | CBH       | 40421         | 0        | 559    | Macro International, Inc, National Statistical Office of Malawi. Malawi Demographic and Health Survey 2000. Fairfax, United States: ICF International.                                                                                                                                                          | 20252   |
| Malawi     | 2005 | CBH       | 35883         | 0        | 520    | Macro International, Inc, National Statistical Office of Malawi. Malawi Demographic and Health Survey 2004-2005. Fairfax, United States: ICF International.                                                                                                                                                     | 20263   |
| Malawi     | 2006 | CBH       | 78960         | 26       | 0      | United Nations Children's Fund (UNICEF), National Statistics Office (Malawi). Malawi Multiple Indicator Cluster Survey 2006. New York, United States: United Nations Children's Fund (UNICEF).                                                                                                                  | 7919    |
| Malawi     | 2008 | SBH       | 875423        | 225      | 0      | National Statistical Office (Malawi), Minnesota Population Center. Malawi Population and Housing Census 2008 from the Integrated Public Use Microdata Series, International: [Machine-readable database]. Minneapolis: University of Minnesota, 2011.                                                           | 40186   |
| Malawi     | 2010 | CBH       | 72301         | 0        | 827    | ICF Macro, National Statistical Office of Malawi. Malawi Demographic and Health Survey 2010. Fairfax, United States: ICF International.                                                                                                                                                                         | 21393   |
| Malawi     | 2012 | SBH       | 8026          | 0        | 140    | ICF International, National Malaria Control Program (Malawi). Malawi Malaria Indicator Survey 2012. Fairfax, United States: ICF International.                                                                                                                                                                  | 77387   |

| Country | Year | Data Type | Children Born | Polygons | Points | Citation                                                                                                                                                                                                                                                             | GHDx ID |
|---------|------|-----------|---------------|----------|--------|----------------------------------------------------------------------------------------------------------------------------------------------------------------------------------------------------------------------------------------------------------------------|---------|
| Malawi  | 2014 | SBH       | 8126          | 0        | 140    | ICF International, Ministry of Health (Malawi), National Malaria Control Program (Malawi), National Statistical Office of Malawi. Malawi Malaria Indicator Survey 2014. Fairfax, United States: ICF International, 2015.                                             | 157059  |
| Malawi  | 2014 | CBH       | 72579         | 31       | 0      | National Statistical Office of Malawi, United Nations Children's Fund (UNICEF). Malawi Multiple Indicator Cluster Survey 2013-2014. New York, United States: United Nations Children's Fund (UNICEF), 2015.                                                          | 161662  |
| Malawi  | 2016 | CBH       | 68074         | 0        | 850    | Emory University and Centers for Disease Control & Prevention Collaboration, ICF International, Ministry of Health (Malawi), National Statistical Office of Malawi. Malawi Demographic and Health Survey 2015-2016. Fairfax, United States: ICF International, 2017. | 218581  |
| Malawi  | 2017 | SBH       | 39128         | 0        | 148    | ICF International, National Malaria Control Program (Malawi). Malawi Malaria Indicator Survey 2017. Fairfax, United States: ICF International, 2018.                                                                                                                 | 286769  |
| Mali    | 2001 | CBH       | 48407         | 0        | 399    | Macro International, Inc, National Directorate of Statistics and Informatics (DNSI) (Mali), Planning and Statistics Unit, Ministry of Health (Mali). Mali Demographic and Health Survey 2001. Fairfax, United States: ICF International.                             | 20315   |
| Mali    | 2006 | CBH       | 52140         | 0        | 405    | Macro International, Inc, Ministry of Health (Mali), National Directorate of Statistics and Informatics (DNSI) (Mali). Mali Demographic and Health Survey 2006. Fairfax, United States: ICF International.                                                           | 20274   |

| Country    | Year | Data Type | Children Born | Polygons | Points | Citation                                                                                                                                                                                                                                                                               | GHDx ID |
|------------|------|-----------|---------------|----------|--------|----------------------------------------------------------------------------------------------------------------------------------------------------------------------------------------------------------------------------------------------------------------------------------------|---------|
| Mali       | 2009 | SBH       | 840735        | 244      | 0      | Central Census Bureau (Mali), Minnesota Population Center. Mali Census 2009 from the Integrated Public Use Microdata Series, International: [Machine-readable database]. Minneapolis: University of Minnesota.                                                                         | 151311  |
| Mali       | 2013 | CBH       | 33803         | 0        | 413    | ICF International, INFO-STAT (Mali), Ministry of Health (Mali), National Institute of Statistics (INSTAT) (Mali), Planning and Statistics Unit, Ministry of Health (Mali). Mali Demographic and Health Survey 2012-2013. Fairfax, United States: ICF International, 2014.              | 77388   |
| Mali       | 2015 | SBH       | 28960         | 0        | 177    | ICF International, INFO-STAT (Mali), Ministry of Health and Public Hygiene (Mali), National Institute of Public Health Research (INRSP) (Mali), National Institute of Statistics (INSTAT) (Mali). Mali Malaria Indicator Survey 2015. Fairfax, United States: ICF International, 2016. | 218587  |
| Mali       | 2015 | CBH       | 55820         | 8        | 0      | Ministry of Health (Mali), Ministry of Planning (Mali), National Institute of Statistics (INSTAT) (Mali), United Nations Children's Fund (UNICEF). Mali Multiple Indicator Cluster Survey 2015. New York, United States: United Nations Children's Fund (UNICEF), 2017.                | 248224  |
| Mauritania | 2001 | CBH       | 19202         | 13       | 0      | Macro International, Inc, National Office of Statistics (Mauritania). Mauritania Demographic and Health Survey 2000-2001. Fairfax, United States: ICF International.                                                                                                                   | 20322   |
| Mauritania | 2004 | CBH       | 13246         | 13       | 0      | Macro International, Inc, Ministry of Health and Social Affairs (Mauritania), National Office of Statistics (Mauritania). Mauritania Special Demographic and Health Survey 2003-2004.                                                                                                  | 26871   |



| Country    | Year | Data Type | Children Born | Polygons | Points | Citation                                                                                                                                                                                                                        | GHDx ID |
|------------|------|-----------|---------------|----------|--------|---------------------------------------------------------------------------------------------------------------------------------------------------------------------------------------------------------------------------------|---------|
| Mauritania | 2007 | SBH       | 35683         | 196      | 0      | National Office of Statistics (Mauritania), United Nations Children's Fund (UNICEF). Mauritania Multiple Indicator Cluster Survey 2007. New York, United States: United Nations Children's Fund (UNICEF).                       | 8115    |
| Mauritania | 2011 | CBH       | 33648         | 194      | 0      | National Office of Statistics (Mauritania), United Nations Children's Fund (UNICEF). Mauritania Multiple Indicator Cluster Survey 2011. New York, United States: United Nations Children's Fund (UNICEF), 2015.                 | 152783  |
| Mauritania | 2015 | CBH       | 75012         | 13       | 0      | National Office of Statistics (Mauritania), United Nations Children's Fund (UNICEF). Mauritania Multiple Indicator Cluster Survey 2015. New York, United States: United Nations Children's Fund (UNICEF), 2018.                 | 267343  |
| Mongolia   | 2003 | SBH       | 21076         | 20       | 0      | Ministry of Health (Mongolia), National Statistical Office of Mongolia, United Nations Population Fund (UNFPA). Mongolia Reproductive Health Survey 2003. Ulaanbaatar, Mongolia: National Statistical Office of Mongolia, 2004. | 24159   |
| Mongolia   | 2005 | SBH       | 15378         | 22       | 0      | National Statistical Office of Mongolia, United Nations Children's Fund (UNICEF). Mongolia Multiple Indicator Cluster Survey 2005. New York, United States: United Nations Children's Fund (UNICEF).                            | 8777    |
| Mongolia   | 2010 | SBH       | 18061         | 217      | 0      | National Statistical Office of Mongolia, United Nations Children's Fund (UNICEF). Mongolia Multiple Indicator Cluster Survey 2010. New York, United States: United Nations Children's Fund (UNICEF), 2013.                      | 76704   |
| Mongolia   | 2012 | SBH       | 3471          | 23       | 0      | National Statistical Office of Mongolia, United Nations Children's Fund (UNICEF). Mongolia - Khuvsgul Multiple Indicator Cluster Survey 2012. New York, United States: United Nations Children's Fund (UNICEF), 2015.           | 189045  |

| Country  | Year | Data Type | Children Born | Polygons | Points | Citation                                                                                                                                                                                                                                                                   | GHDx ID |
|----------|------|-----------|---------------|----------|--------|----------------------------------------------------------------------------------------------------------------------------------------------------------------------------------------------------------------------------------------------------------------------------|---------|
| Mongolia | 2012 | SBH       | 1628          | 1        | 0      | National Statistical Office of Mongolia, United Nations Children's Fund (UNICEF). Mongolia - Nalaikh District Multiple Cluster Indicator Survey 2012. New York, United States: United Nations Children's Fund (UNICEF), 2017.                                              | 189048  |
| Mongolia | 2016 | CBH       | 24448         | 528      | 0      | Government of Mongolia, National Statistical Office of Mongolia, United Nations Children's Fund (UNICEF), United Nations Population Fund (UNFPA). Mongolia Multiple Indicator Cluster Survey 2013. New York, United States: United Nations Children's Fund (UNICEF), 2016. | 150866  |
| Mongolia | 2016 | CBH       | 4453          | 82       | 0      | National Statistical Office of Mongolia, United Nations Children's Fund (UNICEF). Mongolia - Khuvsgul Multiple Indicator Cluster Survey 2016. New York, United States: United Nations Children's Fund (UNICEF), 2018.                                                      | 335994  |
| Morocco  | 2004 | CBH       | 32494         | 0        | 480    | League of Arab States, Macro International, Inc, Ministry of Health (Morocco). Morocco Demographic and Health Survey 2003-2004. Fairfax, United States: ICF International.                                                                                                 | 20361   |
| Morocco  | 2004 | SBH       | 726578        | 60       | 0      | Minnesota Population Center, High Commission for Planning (Morocco). Morocco Population and Housing Census 2004 from the Integrated Public Use Microdata Series, International: [Machine-readable database]. Minneapolis: University of Minnesota, 2012.                   | 56492   |
| Morocco  | 2011 | SBH       | 30414         | 59       | 0      | Ministry of Health (Morocco), Pan Arab Project for Family Health (PAPFAM), United Nations Children's Fund (UNICEF), United Nations Population Fund (UNFPA), World Health Organization (WHO). Morocco National Survey on Population and Family Health 2010-2011.            | 126909  |

| Country    | Year | Data Type | Children Born | Polygons | Points | Citation                                                                                                                                                                                                                                                                                      | GHDx ID |
|------------|------|-----------|---------------|----------|--------|-----------------------------------------------------------------------------------------------------------------------------------------------------------------------------------------------------------------------------------------------------------------------------------------------|---------|
| Mozambique | 2003 | CBH       | 37443         | 11       | 0      | Macro International, Inc, National Institute of Statistics (INE) (Mozambique). Mozambique Demographic and Health Survey 2003-2004. Fairfax, United States: ICF International.                                                                                                                 | 20394   |
| Mozambique | 2007 | SBH       | 1359379       | 337      | 0      | Minnesota Population Center, Mozambique National Statistics Institute. Mozambique Census 2007 from the Integrated Public Use Microdata Series, International: [Machine-readable database]. Minneapolis: University of Minnesota, 2015.                                                        | 227143  |
| Mozambique | 2009 | SBH       | 29263         | 0        | 270    | ICF Macro, Ministry of Health (Mozambique), National Institute of Statistics (INE) (Mozambique). Mozambique AIDS Indicator Survey 2009. Fairfax, United States: ICF International, 2010.                                                                                                      | 8906    |
| Mozambique | 2009 | CBH       | 42215         | 618      | 67     | United Nations Children's Fund (UNICEF), National Statistics Institute (Mozambique). Mozambique Multiple Indicator Cluster Survey 2008-2009. New York, United States: United Nations Children's Fund (UNICEF).                                                                                | 27031   |
| Mozambique | 2011 | CBH       | 37984         | 0        | 609    | ICF Macro, Manhica Health Research Center (CISM), Ministry of Health (Mozambique), National Institute of Statistics (INE) (Mozambique). Mozambique Demographic and Health Survey 2011. Fairfax, United States: ICF International.                                                             | 55975   |
| Mozambique | 2015 | CBH       | 6356          | 0        | 20     | Centers for Disease Control and Prevention (CDC), ICF International, Ministry of Health (Mozambique), National Institute of Health (Mozambique), National Institute of Statistics (INE) (Mozambique). Mozambique AIDS Indicator Survey 2015. Fairfax, United States: ICF International, 2018. | 157060  |

| Country | Year | Data Type | Children Born | Polygons | Points | Citation                                                                                                                                                                                                               | GHDx ID |
|---------|------|-----------|---------------|----------|--------|------------------------------------------------------------------------------------------------------------------------------------------------------------------------------------------------------------------------|---------|
| Myanmar | 2010 | CBH       | 60796         | 17       | 0      | Ministry of Health (Myanmar), Ministry of National Planning and Economic Development (Myanmar), United Nations Children's Fund (UNICEF). Myanmar Multiple Indicator Cluster Survey 2009-2010.                          | 90696   |
| Myanmar | 2016 | CBH       | 22989         | 0        | 441    | ICF International, Ministry of Health and Sports (Myanmar). Myanmar Demographic and Health Survey 2015-2016. Fairfax, United States: ICF International, 2017.                                                          | 157061  |
| Namibia | 2000 | CBH       | 14946         | 0        | 259    | Macro International, Inc, Ministry of Health and Social Services (Namibia), National Planning Commission (Namibia). Namibia Demographic and Health Survey 2000. Calverton, United States: Macro International, Inc.    | 20417   |
| Namibia | 2007 | CBH       | 19522         | 0        | 491    | Macro International, Inc, Ministry of Health and Social Services (Namibia). Namibia Demographic and Health Survey 2006-2007. Fairfax, United States: ICF International.                                                | 20428   |
| Namibia | 2011 | SBH       | 206980        | 13       | 0      | Namibia Statistics Agency, Statistics South Africa. Namibia Population and Housing Census 2011. Windhoek, Namibia: Namibia Statistics Agency, 2013.                                                                    | 134132  |
| Namibia | 2013 | CBH       | 18090         | 0        | 549    | ICF International, Ministry of Health and Social Services (Namibia), Namibia Institute of Pathology, Namibia Statistics Agency. Namibia Demographic and Health Survey 2013. Fairfax, United States: ICF International. | 150382  |
| Nepal   | 2001 | CBH       | 28955         | 0        | 251    | Macro International, Inc, Ministry of Health and Population (Nepal), New ERA. Nepal Demographic and Health Survey 2001. Fairfax, United States: ICF International.                                                     | 20450   |

| Country   | Year | Data Type | Children Born | Polygons | Points | Citation                                                                                                                                                                                                      | GHDx ID |
|-----------|------|-----------|---------------|----------|--------|---------------------------------------------------------------------------------------------------------------------------------------------------------------------------------------------------------------|---------|
| Nepal     | 2004 | CBH       | 11800         | 72       | 0      | Central Bureau of Statistics (Nepal), World Bank. Nepal Living Standards Measurement Survey 2003-2004. Kathmandu, Nepal: Central Bureau of Statistics (Nepal).                                                | 46480   |
| Nepal     | 2006 | CBH       | 26394         | 0        | 260    | Macro International, Inc, Ministry of Health and Population (Nepal), New ERA. Nepal Demographic and Health Survey 2006. Fairfax, United States: ICF International.                                            | 20462   |
| Nepal     | 2011 | CBH       | 26615         | 0        | 289    | ICF Macro, Ministry of Health and Population (Nepal), New ERA. Nepal Demographic and Health Survey 2011. Fairfax, United States: ICF International.                                                           | 21240   |
| Nepal     | 2014 | CBH       | 28647         | 0        | 510    | Central Bureau of Statistics (Nepal), United Nations Children's Fund (UNICEF). Nepal Multiple Indicator Cluster Survey 2014. New York, United States: United Nations Children's Fund (UNICEF), 2015.          | 162317  |
| Nepal     | 2017 | CBH       | 26028         | 73       | 383    | ICF International, Ministry of Health (Nepal), New ERA. Nepal Demographic and Health Survey 2016-2017. Fairfax, United States: ICF International, 2017.                                                       | 286782  |
| Nicaragua | 2001 | SBH       | 13963         | 116      | 0      | National Institute of Statistics and Censuses (Nicaragua), World Bank. Nicaragua Living Standards Measurement Survey 2001.                                                                                    | 9422    |
| Nicaragua | 2001 | CBH       | 34157         | 131      | 0      | Macro International, Inc, Ministry of Health (Nicaragua), National Institute of Statistics and Censuses (Nicaragua). Nicaragua Demographic and Health Survey 2001. Fairfax, United States: ICF International. | 20487   |
| Nicaragua | 2005 | SBH       | 20528         | 135      | 0      | National Institute of Statistics and Censuses (Nicaragua), World Bank. Nicaragua Living Standards Measurement Survey 2005.                                                                                    | 44645   |

| Country   | Year | Data Type | Children Born | Polygons | Points | Citation                                                                                                                                                                                                                                                                                        | GHDx ID |
|-----------|------|-----------|---------------|----------|--------|-------------------------------------------------------------------------------------------------------------------------------------------------------------------------------------------------------------------------------------------------------------------------------------------------|---------|
| Nicaragua | 2005 | SBH       | 295730        | 87       | 0      | Minnesota Population Center, National Institute of Statistics and Censuses (Nicaragua). Nicaragua Population and Housing Census 2005 from the Integrated Public Use Microdata Series, International: [Machine-readable database]. Minneapolis: University of Minnesota, 2012.                   | 56520   |
| Nicaragua | 2007 | CBH       | 34055         | 141      | 0      | Division of Reproductive Health, Centers for Disease Control and Prevention (CDC), National Institute for Development Information (Nicaragua). Nicaragua Reproductive Health Survey 2006-2007. Managua, Nicaragua: National Institute for Development Information (Nicaragua).                  | 9270    |
| Nicaragua | 2012 | CBH       | 31815         | 134      | 0      | Ministry of Health (Nicaragua), National Institute for Development Information (Nicaragua). Nicaragua National Demographic and Health Survey 2011-2012. Managua, Nicaragua: National Institute for Development Information (Nicaragua).                                                         | 126952  |
| Niger     | 2006 | CBH       | 34378         | 8        | 0      | Department of Statistics and National Accounts (Niger), Macro International, Inc. Niger Demographic and Health Survey 2006. Fairfax, United States: ICF International.                                                                                                                          | 20499   |
| Niger     | 2012 | CBH       | 44183         | 8        | 0      | ICF International, Ministry of Public Health (Niger), National Institute of Statistics (Niger). Niger Demographic and Health Survey 2012. Fairfax, United States: ICF International.                                                                                                            | 74393   |
| Nigeria   | 2003 | CBH       | 23038         | 0        | 360    | Department for International Development (DFID) (United Kingdom), National Population Commission of Nigeria, ORC Macro, United Nations Children's Fund (UNICEF), United Nations Population Fund (UNFPA). Nigeria Demographic and Health Survey 2003. Fairfax, United States: ICF International. | 20567   |

| Country | Year | Data Type | Children Born | Polygons | Points | Citation                                                                                                                                                                                                                                                                                                                | GHDx ID |
|---------|------|-----------|---------------|----------|--------|-------------------------------------------------------------------------------------------------------------------------------------------------------------------------------------------------------------------------------------------------------------------------------------------------------------------------|---------|
| Nigeria | 2004 | SBH       | 53051         | 37       | 0      | Federal Office of Statistics (Nigeria). Nigeria Living Standards Survey 2003-2004.                                                                                                                                                                                                                                      | 25006   |
| Nigeria | 2007 | SBH       | 68689         | 37       | 0      | United Nations Children's Fund (UNICEF), National Bureau of Statistics (Nigeria). Nigeria Multiple Indicator Cluster Survey 2007. New York, United States: United Nations Children's Fund (UNICEF).                                                                                                                     | 9516    |
| Nigeria | 2008 | CBH       | 104808        | 0        | 886    | Macro International, Inc, National Population Commission of Nigeria. Nigeria Demographic and Health Survey 2008. Fairfax, United States: ICF International, 2009.                                                                                                                                                       | 21433   |
| Nigeria | 2008 | SBH       | 55508         | 34       | 0      | Central Bank of Nigeria, National Bureau of Statistics (Nigeria), Nigerian Communications Commission (NCC). Nigeria General Household Survey 2008.                                                                                                                                                                      | 24915   |
| Nigeria | 2008 | SBH       | 16333         | 37       | 0      | Federal Ministry of Health (Nigeria), National Agency for the Control of AIDS (NACA) (Nigeria), National Bureau of Statistics (Nigeria), National Population Commission (NPC), Society for Family Health (Nigeria), University College Hospital, Ibadan. Nigeria National HIV/AIDS and Reproductive Health Survey 2007. | 325046  |
| Nigeria | 2010 | CBH       | 19644         | 0        | 239    | ICF Macro, National Malaria Control Programme (Nigeria), National Population Commission of Nigeria. Nigeria Malaria Indicator Survey 2010. Fairfax, United States: ICF International.                                                                                                                                   | 30991   |
| Nigeria | 2011 | SBH       | 100531        | 37       | 0      | National Bureau of Statistics (Nigeria), United Nations Children's Fund (UNICEF). Nigeria Multiple Indicator Cluster Survey 2011. New York, United States: United Nations Children's Fund (UNICEF), 2013.                                                                                                               | 76703   |

| Country  | Year | Data Type | Children Born | Polygons | Points | Citation                                                                                                                                                                                                                                                                                                                                                                                    | GHDx ID |
|----------|------|-----------|---------------|----------|--------|---------------------------------------------------------------------------------------------------------------------------------------------------------------------------------------------------------------------------------------------------------------------------------------------------------------------------------------------------------------------------------------------|---------|
| Nigeria  | 2012 | SBH       | 42204         | 679      | 0      | Expanded Social Marketing Project in Nigeria (ESMPIN), Federal Ministry of Health (Nigeria), Joint United Nations Program on HIV/AIDS (UNAIDS), National Population Commission (NPC), Society for Family Health (Nigeria), University College Hospital, Ibadan, World Health Organization (WHO). Nigeria National HIV/AIDS and Reproductive Health Survey 2012.                             | 324443  |
| Nigeria  | 2013 | CBH       | 119386        | 0        | 889    | ICF International, National Population Commission of Nigeria. Nigeria Demographic and Health Survey 2013. Fairfax, United States: ICF International.                                                                                                                                                                                                                                        | 77390   |
| Nigeria  | 2015 | SBH       | 25450         | 0        | 322    | ICF International, National Bureau of Statistics (Nigeria), National Malaria Control Programme (Nigeria), National Population Commission of Nigeria. Nigeria Malaria Indicator Survey 2015. Fairfax, United States: ICF International, 2016.                                                                                                                                                | 218590  |
| Nigeria  | 2017 | CBH       | 101649        | 37       | 0      | National Agency for the Control of AIDS (Nigeria), National Bureau of Statistics (Nigeria), National Primary Health Care Development Agency (NPHCDA) (Nigeria), United Nations Children's Fund (UNICEF). Nigeria Multiple Indicator Cluster Survey with National Immunization Coverage Survey Supplement 2016-2017. New York, United States: United Nations Children's Fund (UNICEF), 2018. | 218613  |
| Pakistan | 2002 | SBH       | 68782         | 7        | 0      | Federal Bureau of Statistics (Pakistan). Pakistan Integrated Household Survey 2001-2002. Islamabad, Pakistan: Federal Bureau of Statistics (Pakistan).                                                                                                                                                                                                                                      | 9720    |
| Pakistan | 2006 | SBH       | 60656         | 4        | 0      | Federal Bureau of Statistics (Pakistan). Pakistan Social and Living Standards Measurement Survey 2005-2006. Islamabad, Pakistan: Federal Bureau of Statistics (Pakistan).                                                                                                                                                                                                                   | 24818   |



| Country  | Year | Data Type | Children Born | Polygons | Points | Citation                                                                                                                                                                                                                                                                                                                                             | GHDx ID |
|----------|------|-----------|---------------|----------|--------|------------------------------------------------------------------------------------------------------------------------------------------------------------------------------------------------------------------------------------------------------------------------------------------------------------------------------------------------------|---------|
| Pakistan | 2007 | CBH       | 39049         | 0        | 955    | Macro International, Inc, National Institute of Population Studies (Pakistan). Pakistan Demographic and Health Survey 2006-2007. Fairfax, United States: ICF International.                                                                                                                                                                          | 20595   |
| Pakistan | 2008 | SBH       | 56298         | 4        | 0      | Federal Bureau of Statistics (Pakistan). Pakistan Social and Living Standards Measurement Survey 2007-2008. Islamabad, Pakistan: Federal Bureau of Statistics (Pakistan).                                                                                                                                                                            | 30634   |
| Pakistan | 2010 | SBH       | 45966         | 31       | 0      | Government of Balochistan (Pakistan), United Nations Children's Fund (UNICEF). Pakistan - Balochistan Multiple Indicator Cluster Survey 2010. New York, United States: United Nations Children's Fund (UNICEF).                                                                                                                                      | 60942   |
| Pakistan | 2011 | SBH       | 297998        | 145      | 0      | Bureau of Statistics (Punjab), United Nations Children's Fund (UNICEF), United Nations Development Programme (UNDP). Pakistan - Punjab Multiple Indicator Cluster Survey 2011. New York, United States: United Nations Children's Fund (UNICEF), 2013.                                                                                               | 104236  |
| Pakistan | 2013 | CBH       | 50238         | 6        | 0      | ICF International, National Institute of Population Studies (Pakistan), Pakistan Bureau of Statistics. Pakistan Demographic and Health Survey 2012-2013. Fairfax, United States: ICF International.                                                                                                                                                  | 77521   |
| Pakistan | 2014 | SBH       | 68680         | 28       | 0      | Bureau of Statistics, Planning and Development Department, Government of Sindh (Pakistan), Global Alliance for Improved Nutrition (GAIN), Pakistan Council of Research in Water Resource (PCRWR), United Nations Children's Fund (UNICEF). Pakistan - Sindh Multiple Indicator Cluster Survey 2014. Fairfax, United States: ICF International, 2016. | 232763  |

| Country   | Year | Data Type | Children Born | Polygons | Points | Citation                                                                                                                                                                                                                                                                                               | GHDx ID |
|-----------|------|-----------|---------------|----------|--------|--------------------------------------------------------------------------------------------------------------------------------------------------------------------------------------------------------------------------------------------------------------------------------------------------------|---------|
| Pakistan  | 2014 | SBH       | 121066        | 36       | 0      | Bureau of Statistics (Punjab), United Nations Children's Fund (UNICEF). Pakistan - Punjab Multiple Indicator Cluster Survey 2014. New York, United States: United Nations Children's Fund (UNICEF), 2015.                                                                                              | 236266  |
| Pakistan  | 2018 | CBH       | 50495         | 0        | 561    | ICF International, Ministry of National Health Services, Regulations & Coordination (Pakistan), National Institute of Population Studies (Pakistan). Pakistan Demographic and Health Survey 2017-2018. Fairfax, United States: ICF International, 2018.                                                | 286783  |
| Palestine | 2000 | CBH       | 26074         | 2        | 0      | Ministry of Health (Palestine), Palestinian Central Bureau of Statistics, United Nations Children's Fund (UNICEF), United Nations Population Fund (UNFPA). Palestine - West Bank and Gaza Strip Multiple Indicator Cluster Survey 2000. Ramallah, Palestine: Palestinian Central Bureau of Statistics. | 10001   |
| Palestine | 2004 | CBH       | 22478         | 2        | 0      | Palestinian Central Bureau of Statistics. Palestine Demographic and Health Survey 2004.                                                                                                                                                                                                                | 20596   |
| Palestine | 2007 | CBH       | 51635         | 16       | 0      | League of Arab States, Palestinian Central Bureau of Statistics, United Nations Children's Fund (UNICEF). Palestine Family Health Survey 2006-2007.                                                                                                                                                    | 9999    |
| Palestine | 2010 | CBH       | 55823         | 16       | 0      | Ministry of Health (Palestine), Palestinian Central Bureau of Statistics, United Nations Children's Fund (UNICEF), United Nations Population Fund (UNFPA). Palestine Multiple Indicator Cluster Survey 2010. New York, United States: United Nations Children's Fund (UNICEF), 2014.                   | 125591  |

| Country          | Year | Data Type | Children Born | Polygons | Points | Citation                                                                                                                                                                                                                                                                   | GHDx ID |
|------------------|------|-----------|---------------|----------|--------|----------------------------------------------------------------------------------------------------------------------------------------------------------------------------------------------------------------------------------------------------------------------------|---------|
| Palestine        | 2014 | CBH       | 31817         | 16       | 0      | Ministry of Health (Palestine), Palestinian Central Bureau of Statistics, United Nations Children's Fund (UNICEF). Palestine Multiple Indicator Cluster Survey 2014. New York, United States: United Nations Children's Fund (UNICEF), 2015.                               | 161590  |
| Panama           | 2003 | SBH       | 13641         | 12       | 0      | Census and Statistics Directorate (Panama), Ministry of Economy and Finance (Panama), World Bank. Panama Living Standard Measurement Survey 2003. Washington DC, United States: World Bank.                                                                                | 10224   |
| Panama           | 2008 | SBH       | 13333         | 12       | 0      | Census and Statistics Directorate (Panama), Ministry of Economy and Finance (Panama), World Bank. Panama Living Standard Measurement Survey 2008. Washington DC, United States: World Bank.                                                                                | 46517   |
| Panama           | 2010 | SBH       | 156544        | 39       | 0      | Minnesota Population Center, National Institute of Statistics and Census (Panama). Panama Population and Housing Census 2010 from the Integrated Public Use Microdata Series, International: [Machine-readable database]. Minneapolis: University of Minnesota, 2013.      | 106529  |
| Papua New Guinea | 2006 | SBH       | 48396         | 99       | 0      | National Statistical Office (Papua New Guinea), National Statistics Office (Philippines). Papua New Guinea Demographic and Health Survey 2006-2007.                                                                                                                        | 44870   |
| Paraguay         | 2002 | SBH       | 272785        | 76       | 0      | Minnesota Population Center, Paraguay Department of Statistics, Surveys and Censuses. Paraguay Population and Housing Census 2002 from the Integrated Public Use Microdata Series, International: [Machine-readable database]. Minneapolis: University of Minnesota, 2015. | 227167  |

| Country  | Year | Data Type | Children Born | Polygons | Points | Citation                                                                                                                                                                                                                                                                                       | GHDx ID |
|----------|------|-----------|---------------|----------|--------|------------------------------------------------------------------------------------------------------------------------------------------------------------------------------------------------------------------------------------------------------------------------------------------------|---------|
| Paraguay | 2004 | CBH       | 14799         | 16       | 0      | Division of Reproductive Health-Centers for Disease Control and Prevention (CDC). (2005): Paraguay Reproductive Health Survey 2004. Asuncion, Paraguay, Paraguayan Center for Population Studies (CEPEP).                                                                                      | 10370   |
| Paraguay | 2008 | CBH       | 11368         | 16       | 0      | Paraguay Center for Population Studies (CEPEP). Paraguay Reproductive Health Survey 2008. Asuncion, Paraguay: Paraguayan Center for Population Studies (CEPEP).                                                                                                                                | 27525   |
| Paraguay | 2016 | CBH       | 14355         | 9        | 0      | General Directorate of Statistics, Surveys and Censuses (Paraguay), Ministry of Public Health and Social Welfare (Paraguay), United Nations Children's Fund (UNICEF). Paraguay Multiple Indicator Cluster Survey 2016. New York, United States: United Nations Children's Fund (UNICEF), 2017. | 324470  |
| Peru     | 2000 | CBH       | 65453         | 0        | 1409   | Macro International, Inc, National Institute of Statistics (Peru). Peru Demographic and Health Survey 2000. Fairfax, United States: ICF International.                                                                                                                                         | 20649   |
| Peru     | 2007 | SBH       | 1255851       | 175      | 0      | National Institute of Statistics and Informatics (INEI) (Peru), Minnesota Population Center. Peru National Population and Housing Census 2007 from the Integrated Public Use Microdata Series, International: [Machine-readable database]. Minneapolis: University of Minnesota.               | 41267   |
| Peru     | 2008 | CBH       | 89220         | 0        | 1408   | Ministry of Economy and Finance (Peru), National Institute of Statistics and Informatics (Peru), ORC Macro. Peru Continuous Demographic and Health Survey 2003-2008. Fairfax, United States: ICF International.                                                                                | 275090  |

| Country | Year | Data Type | Children Born | Polygons | Points | Citation                                                                                                                                                                                                                                   | GHDx ID |
|---------|------|-----------|---------------|----------|--------|--------------------------------------------------------------------------------------------------------------------------------------------------------------------------------------------------------------------------------------------|---------|
| Peru    | 2009 | CBH       | 50084         | 0        | 1132   | National Institute of Statistics and Informatics (Peru), ORC Macro. Peru Continuous Demographic and Health Survey 2009. Fairfax, United States: ICF International.                                                                         | 270404  |
| Peru    | 2010 | CBH       | 46780         | 24       | 0      | National Institute of Statistics and Informatics (Peru). Peru Continuous Demographic and Health Survey 2010. Fairfax, United States: ICF International.                                                                                    | 270469  |
| Peru    | 2011 | CBH       | 46194         | 24       | 0      | Macro International, Inc, National Institute of Statistics and Informatics (Peru). Peru Continuous Demographic and Health Survey 2011. Fairfax, United States: ICF International.                                                          | 270470  |
| Peru    | 2012 | CBH       | 47261         | 24       | 0      | Macro International, Inc, National Institute of Statistics and Informatics (Peru). Peru Continuous Demographic and Health Survey 2012. Fairfax, United States: ICF International.                                                          | 270471  |
| Peru    | 2013 | CBH       | 44725         | 24       | 0      | ICF International, National Institute of Statistics and Informatics (Peru). Peru Continuous Demographic and Health Survey 2013. Lima, Peru: National Institute of Statistics and Informatics (Peru), 2014.                                 | 146860  |
| Peru    | 2014 | CBH       | 47633         | 24       | 0      | ICF International, Ministry of Health (Peru), National Institute of Statistics and Informatics (Peru), National Police of Peru (PNP). Peru Continuous Demographic and Health Survey 2014. Fairfax, United States: ICF International, 2015. | 209930  |
| Peru    | 2015 | CBH       | 74559         | 0        | 1617   | National Institute of Statistics and Informatics (Peru). Peru Demographic and Family Health Survey 2015. Lima, Peru: National Institute of Statistics and Informatics (Peru), 2017.                                                        | 303663  |

| Country     | Year | Data Type | Children Born | Polygons | Points | Citation                                                                                                                                                                                                                                                                                        | GHDx ID |
|-------------|------|-----------|---------------|----------|--------|-------------------------------------------------------------------------------------------------------------------------------------------------------------------------------------------------------------------------------------------------------------------------------------------------|---------|
| Peru        | 2016 | CBH       | 67481         | 0        | 1976   | National Institute of Statistics and Informatics (Peru). Peru Demographic and Family Health Survey 2016. Lima, Peru: National Institute of Statistics and Informatics (Peru), 2017.                                                                                                             | 303664  |
| Peru        | 2017 | SBH       | 64444         | 0        | 1933   | National Center for Food and Nutrition, National Institute of Health (Peru), National Institute of Statistics and Informatics (Peru), National Police of Peru (PNP). Peru Demographic and Family Health Survey 2017. Lima, Peru: National Institute of Statistics and Informatics (Peru).       | 358824  |
| Philippines | 2003 | CBH       | 30443         | 0        | 815    | Macro International, Inc, National Statistics Office (Philippines). Philippines Demographic and Health Survey 2003. Fairfax, United States: ICF International.                                                                                                                                  | 20699   |
| Philippines | 2008 | CBH       | 28518         | 0        | 784    | Macro International, Inc, National Statistics Office (Philippines). Philippines Demographic and Health Survey 2008. Fairfax, United States: ICF International, 2010.                                                                                                                            | 21421   |
| Philippines | 2010 | SBH       | 4151720       | 1308     | 0      | Philippines Statistics Authority, Minnesota Population Center. Philippines Population and Housing Census 2010 from the Integrated Public Use Microdata Series, International. Minneapolis, MN: IPUMS, 2018. <a href="https://doi.org/10.18128/D020.V7.1">https://doi.org/10.18128/D020.V7.1</a> | 367607  |
| Philippines | 2011 | CBH       | 99962         | 82       | 0      | ICF International, National Statistics Office (Philippines). Philippines Demographic and Health Survey 2011.                                                                                                                                                                                    | 135803  |
| Philippines | 2013 | CBH       | 31680         | 17       | 0      | ICF International, Philippines Statistics Authority. Philippines Demographic and Health Survey 2013. Fairfax, United States: ICF International, 2014.                                                                                                                                           | 142943  |

| Country               | Year | Data Type | Children Born | Polygons | Points | Citation                                                                                                                                                                                                                                       | GHDx ID |
|-----------------------|------|-----------|---------------|----------|--------|------------------------------------------------------------------------------------------------------------------------------------------------------------------------------------------------------------------------------------------------|---------|
| Philippines           | 2017 | CBH       | 10551         | 0        | 1206   | ICF International, Philippines Statistics Authority, United States Agency for International Development (USAID). Philippines Demographic and Health Survey 2017. Fairfax, United States: ICF International, 2018.                              | 337877  |
| Republic of the Congo | 2005 | CBH       | 16687         | 12       | 0      | Macro International, Inc, National Center for Statistics and Economic Studies (Congo, Rep.). Congo Demographic and Health Survey 2005. Fairfax, United States: ICF International.                                                              | 19391   |
| Republic of the Congo | 2009 | SBH       | 18574         | 12       | 0      | ICF Macro, National Center for Statistics and Economic Studies (Congo, Rep.). Congo AIDS Indicator Survey 2009. Fairfax, United States: ICF International.                                                                                     | 3133    |
| Republic of the Congo | 2012 | CBH       | 31948         | 12       | 0      | ICF International, Ministry of Health (Congo, Rep.), National Center for Statistics and Economic Studies (Congo, Rep.). Congo Demographic and Health Survey 2011-2012. Fairfax, United States: ICF International.                              | 56151   |
| Republic of the Congo | 2014 | CBH       | 31640         | 11       | 0      | National Institute of Statistics (INS) (Congo, Rep.), United Nations Children's Fund (UNICEF). Congo Multiple Indicator Cluster Survey 2014-2015. New York, United States: United Nations Children's Fund (UNICEF), 2018.                      | 234733  |
| Rwanda                | 2000 | CBH       | 27602         | 12       | 0      | Macro International, Inc, National Office of Population (Rwanda). Rwanda Demographic and Health Survey 2000. Fairfax, United States: ICF International.                                                                                        | 20722   |
| Rwanda                | 2002 | SBH       | 518181        | 104      | 0      | National Census Commission (Rwanda), Minnesota Population Center. Rwanda Population and Housing Census 2002 from the Integrated Public Use Microdata Series, International: [Machine-readable database]. Minneapolis: University of Minnesota. | 42432   |

| Country | Year | Data Type | Children Born | Polygons | Points | Citation                                                                                                                                                                                                                                                                                               | GHDx ID |
|---------|------|-----------|---------------|----------|--------|--------------------------------------------------------------------------------------------------------------------------------------------------------------------------------------------------------------------------------------------------------------------------------------------------------|---------|
| Rwanda  | 2005 | CBH       | 30072         | 0        | 456    | Macro International, Inc, National Institute of Statistics of Rwanda. Rwanda Demographic and Health Survey 2005. Fairfax, United States: ICF International.                                                                                                                                            | 20740   |
| Rwanda  | 2006 | SBH       | 21031         | 30       | 0      | National Institute of Statistics of Rwanda (NISR), Oxford Policy Management. Rwanda Integrated Living Conditions Survey 2005-2006. Kigali, Rwanda: National Institute of Statistics of Rwanda (NISR).                                                                                                  | 11324   |
| Rwanda  | 2008 | CBH       | 18421         | 0        | 246    | Macro International, Inc, Ministry of Health (Rwanda), National Institute of Statistics of Rwanda. Rwanda Interim Demographic and Health Survey 2007-2008. Fairfax, United States: ICF International.                                                                                                  | 21222   |
| Rwanda  | 2011 | CBH       | 32639         | 0        | 492    | ICF Macro, Ministry of Health (Rwanda), National Institute of Statistics of Rwanda. Rwanda Demographic and Health Survey 2010-2011. Fairfax, United States: ICF International.                                                                                                                         | 56040   |
| Rwanda  | 2012 | SBH       | 550802        | 30       | 0      | National Institute of Statistics of Rwanda. Rwanda Population and Housing Census 2012. Kigali, Rwanda: National Institute of Statistics of Rwanda, 2015.                                                                                                                                               | 218773  |
| Rwanda  | 2012 | SBH       | 552005        | 29       | 0      | National Institute of Statistics (Rwanda), Minnesota Population Center. Rwanda Population and Housing Census 2012 from the Integrated Public Use Microdata Series, International. Minneapolis, MN: IPUMS, 2018.<br><a href="https://doi.org/10.18128/D020.V7.1">https://doi.org/10.18128/D020.V7.1</a> | 367645  |
| Rwanda  | 2013 | SBH       | 11726         | 5        | 0      | ICF International, Ministry of Health (Rwanda). Rwanda Malaria Indicator Survey 2013. Fairfax, United States: ICF International, 2014.                                                                                                                                                                 | 77391   |



| Country               | Year | Data Type | Children Born | Polygons | Points | Citation                                                                                                                                                                                                                                                                                                                                                                                                                                 | GHDx ID |
|-----------------------|------|-----------|---------------|----------|--------|------------------------------------------------------------------------------------------------------------------------------------------------------------------------------------------------------------------------------------------------------------------------------------------------------------------------------------------------------------------------------------------------------------------------------------------|---------|
| Rwanda                | 2015 | CBH       | 30058         | 0        | 492    | ICF International, Ministry of Health (Rwanda), National Institute of Statistics of Rwanda. Rwanda Demographic and Health Survey 2014-2015. Fairfax, United States: ICF International, 2016.                                                                                                                                                                                                                                             | 157063  |
| Rwanda                | 2017 | SBH       | 11349         | 30       | 0      | ICF International, Ministry of Health (Rwanda), Rwanda Biomedical Center. Rwanda Malaria Indicator Survey 2017. Fairfax, United States: ICF International, 2018.                                                                                                                                                                                                                                                                         | 350836  |
| Sao Tome and Principe | 2009 | CBH       | 7620          | 7        | 0      | ICF Macro, Ministry of Health (Sao Tome and Principe), National Institute of Statistics (Sao Tome and Principe). Sao Tome and Principe Demographic and Health Survey 2008-2009. Fairfax, United States: ICF International.                                                                                                                                                                                                               | 26866   |
| Sao Tome and Principe | 2014 | CBH       | 7492          | 7        | 0      | Global Fund to Fight Aids Tuberculosis and Malaria (GFATM), ICF International, National Center for Endemic Diseases (CNE) (Sao Tome and Principe), National Institute of Statistics (Sao Tome and Principe), United Nations Children's Fund (UNICEF), United Nations Development Programme (UNDP). Sao Tome and Principe Multiple Indicator Cluster Survey 2014. New York, United States: United Nations Children's Fund (UNICEF), 2016. | 214640  |
| Senegal               | 2002 | SBH       | 571816        | 34       | 0      | Directorate of Forecasting and Statistics (Senegal), Minnesota Population Center. Senegal General Population and Housing Census 2002 from the Integrated Public Use Microdata Series, International: [Machine-readable database]. Minneapolis: University of Minnesota.                                                                                                                                                                  | 43142   |
| Senegal               | 2005 | CBH       | 39895         | 0        | 366    | Ministry of Health and Prevention (Senegal), Research Center for Human Development (Senegal). Senegal Demographic and Health Survey 2005. Fairfax, United States: ICF International.                                                                                                                                                                                                                                                     | 26855   |

| Country | Year | Data Type | Children Born | Polygons | Points | Citation                                                                                                                                                                                                                                                                  | GHDx ID |
|---------|------|-----------|---------------|----------|--------|---------------------------------------------------------------------------------------------------------------------------------------------------------------------------------------------------------------------------------------------------------------------------|---------|
| Senegal | 2006 | SBH       | 18520         | 11       | 0      | Macro International, Inc, Research Center for Human Development (Senegal). Senegal Malaria Indicator Survey 2006. Fairfax, United States: ICF International.                                                                                                              | 11516   |
| Senegal | 2009 | CBH       | 53608         | 0        | 319    | Macro International, Inc, Research Center for Human Development (Senegal). Senegal Malaria Indicator Survey 2008-2009. Fairfax, United States: ICF International.                                                                                                         | 11540   |
| Senegal | 2011 | CBH       | 42510         | 0        | 385    | Center for Research in Human Development (CRDH), Cheikh Anta Diop University, Hospital Aristide Le Dantec, ICF Macro, National Agency of Statistics and Demography (Senegal). Senegal Demographic and Health Survey 2010-2011. Fairfax, United States: ICF International. | 56063   |
| Senegal | 2013 | CBH       | 22563         | 0        | 200    | ICF International, Ministry of Health and Social Action (Senegal), National Agency of Statistics and Demography (Senegal). Senegal Continuous Demographic and Health Survey 2012-2013. Fairfax, United States: ICF International.                                         | 111432  |
| Senegal | 2014 | CBH       | 22365         | 14       | 0      | Cheikh Anta Diop University, ICF International, National Agency of Statistics and Demography (Senegal). Senegal Continuous Demographic and Health Survey 2014. Fairfax, United States: ICF International.                                                                 | 191270  |
| Senegal | 2015 | CBH       | 23250         | 0        | 214    | Cheikh Anta Diop University, ICF International, National Agency of Statistics and Demography (Senegal). Senegal Continuous Demographic and Health Survey 2015. Fairfax, United States: ICF International, 2016.                                                           | 218592  |

| Country      | Year | Data Type | Children Born | Polygons | Points | Citation                                                                                                                                                                                                                                                                              | GHDx ID |
|--------------|------|-----------|---------------|----------|--------|---------------------------------------------------------------------------------------------------------------------------------------------------------------------------------------------------------------------------------------------------------------------------------------|---------|
| Senegal      | 2015 | CBH       | 16532         | 4        | 0      | National Agency of Statistics and Demography (Senegal), United Nations Children's Fund (UNICEF). Senegal - Dakar Urban Multiple Indicator Cluster Survey 2015-2016. New York, United States: United Nations Children's Fund (UNICEF), 2018.                                           | 287639  |
| Senegal      | 2016 | CBH       | 22740         | 0        | 214    | ICF International, Ministry of Health and Social Action (Senegal), National Agency of Statistics and Demography (Senegal). Senegal Continuous Demographic and Health Survey 2016. Fairfax, United States: ICF International, 2017.                                                    | 286772  |
| Senegal      | 2017 | CBH       | 42944         | 14       | 0      | ICF International, Ministry of Health and Social Action (Senegal), National Agency of Statistics and Demography (Senegal), Unit for the Fight Against Malnutrition (Senegal). Senegal Continuous Demographic and Health Survey 2017. Fairfax, United States: ICF International, 2018. | 353526  |
| Sierra Leone | 2004 | SBH       | 344320        | 100      | 0      | Statistics Sierra Leone and Minnesota Population Center. Sierra Leone Population and Housing Census 2004 from the Integrated Public Use Microdata Series, International: [Machine-readable database]. Minneapolis: University of Minnesota, 2011.                                     | 11661   |
| Sierra Leone | 2005 | SBH       | 28284         | 14       | 0      | United Nations Children's Fund (UNICEF), Statistics Sierra Leone. Sierra Leone Multiple Indicator Cluster Survey 2005. New York, United States: United Nations Children's Fund (UNICEF).                                                                                              | 11649   |
| Sierra Leone | 2008 | CBH       | 21136         | 0        | 350    | Macro International, Inc, Statistics Sierra Leone. Sierra Leone Demographic and Health Survey 2008. Fairfax, United States: ICF International.                                                                                                                                        | 21258   |

| Country      | Year | Data Type | Children Born | Polygons | Points | Citation                                                                                                                                                                                                                                                                                                                                        | GHDx ID |
|--------------|------|-----------|---------------|----------|--------|-------------------------------------------------------------------------------------------------------------------------------------------------------------------------------------------------------------------------------------------------------------------------------------------------------------------------------------------------|---------|
| Sierra Leone | 2010 | SBH       | 39257         | 14       | 0      | Statistics Sierra Leone, United Nations Children's Fund (UNICEF). Sierra Leone Multiple Indicator Cluster Survey 2010. New York, United States: United Nations Children's Fund (UNICEF).                                                                                                                                                        | 76700   |
| Sierra Leone | 2013 | CBH       | 47392         | 0        | 435    | ICF International, Ministry of Health and Sanitation (Sierra Leone), Statistics Sierra Leone. Sierra Leone Demographic and Health Survey 2013. Fairfax, United States: ICF International, 2014.                                                                                                                                                 | 131467  |
| Sierra Leone | 2016 | SBH       | 28463         | 14       | 0      | Catholic Relief Services (CRS), College of Medicine and Allied Health Sciences, University of Sierra Leone (COMAHS), ICF International, National Malaria Control Programme (Sierra Leone), Roll Back Malaria Partnership, Statistics Sierra Leone. Sierra Leone Malaria Indicator Survey 2016. Fairfax, United States: ICF International, 2017. | 286773  |
| Sierra Leone | 2017 | CBH       | 42070         | 14       | 0      | Statistics Sierra Leone, United Nations Children's Fund (UNICEF). Sierra Leone Multiple Indicator Cluster Survey 2017. New York, United States: United Nations Children's Fund (UNICEF), 2018.                                                                                                                                                  | 218619  |
| Somalia      | 2006 | CBH       | 20034         | 18       | 0      | Pan Arab Project for Family Health (PAPFAM), United Nations Children's Fund (UNICEF). Somalia Multiple Indicator Cluster Survey 2006. New York, United States: United Nations Children's Fund (UNICEF).                                                                                                                                         | 11774   |
| Somalia      | 2011 | CBH       | 16700         | 0        | 244    | Ministry of National Planning and Development (Somaliland), United Nations Children's Fund (UNICEF). Somalia - Somaliland Multiple Indicator Cluster Survey 2011. New York, United States: United Nations Children's Fund (UNICEF), 2015.                                                                                                       | 91507   |

| Country      | Year | Data Type | Children Born | Polygons | Points | Citation                                                                                                                                                                                                                                                                                 | GHDx ID |
|--------------|------|-----------|---------------|----------|--------|------------------------------------------------------------------------------------------------------------------------------------------------------------------------------------------------------------------------------------------------------------------------------------------|---------|
| South Africa | 2001 | SBH       | 1799625       | 277      | 0      | Statistics South Africa, Minnesota Population Center. South Africa Census 2001 from the Integrated Public Use Microdata Series, International: [Machine-readable database]. Minneapolis: University of Minnesota.                                                                        | 43152   |
| South Africa | 2002 | SBH       | 43580         | 9        | 0      | Statistics South Africa. South Africa General Household Survey 2002. Pretoria, South Africa: Statistics South Africa.                                                                                                                                                                    | 115481  |
| South Africa | 2007 | SBH       | 469555        | 218      | 0      | Statistics South Africa, Minnesota Population Center. South Africa Community Survey 2007 from the Integrated Public Use Microdata Series, International: [Machine-readable database]. Minneapolis: University of Minnesota.                                                              | 43158   |
| South Africa | 2016 | CBH       | 14144         | 0        | 714    | Department of Health (South Africa), ICF International, South African Medical Research Council, Statistics South Africa. South Africa Demographic and Health Survey 2016. Fairfax, United States: ICF International, 2019.                                                               | 157064  |
| South Africa | 2016 | SBH       | 1247106       | 212      | 0      | Statistics South Africa. South Africa Community Survey 2016. Pretoria, South Africa: Statistics South Africa, 2016.                                                                                                                                                                      | 280803  |
| South Sudan  | 2008 | SBH       | 337728        | 72       | 0      | Minnesota Population Center, Southern Sudan Centre for Census, Statistics and Evaluation. Sudan - South Sudan Population and Housing Census 2008 from the Integrated Public Use Microdata Series, International: [Machine-readable database]. Minneapolis: University of Minnesota, 2013 | 106548  |

| Country     | Year | Data Type | Children Born | Polygons | Points | Citation                                                                                                                                                                                                                                                                                                                                                               | GHDx ID |
|-------------|------|-----------|---------------|----------|--------|------------------------------------------------------------------------------------------------------------------------------------------------------------------------------------------------------------------------------------------------------------------------------------------------------------------------------------------------------------------------|---------|
| South Sudan | 2010 | CBH       | 28987         | 10       | 0      | Central Bureau of Statistics (Sudan), Federal Ministry of Health (Sudan), Government of Sudan, Ministry of Health (South Sudan), Southern Sudan Centre for Census, Statistics and Evaluation. Sudan - South Multiple Indicator Cluster Survey 2010. New York, United States: United Nations Children's Fund (UNICEF), 2015.                                            | 32189   |
| Sudan       | 2006 | CBH       | 77520         | 25       | 0      | Ministry of Health (Southern Sudan), Federal Ministry of Health (Sudan), Southern Sudan Centre for Census, Statistics and Evaluation (SSCCSE), Central Bureau of Statistics (Sudan). Sudan Family Health Survey 2006.                                                                                                                                                  | 24143   |
| Sudan       | 2008 | SBH       | 2810742       | 128      | 0      | National Population Census Council (Sudan), Central Bureau of Statistics (Sudan), Southern Sudan Centre for Census, Statistics and Evaluation (SSCCSE), Minnesota Population Center. Sudan Population and Housing Census 2008 from the Integrated Public Use Microdata Series, International: [Machine-readable database]. Minneapolis: University of Minnesota, 2011. | 43167   |
| Sudan       | 2010 | CBH       | 47092         | 15       | 0      | Central Bureau of Statistics (Sudan), Ministry of Health (South Sudan). Sudan - North Multiple Indicator Cluster Survey 2010. New York, United States: United Nations Children's Fund (UNICEF), 2015.                                                                                                                                                                  | 153643  |
| Sudan       | 2014 | CBH       | 52245         | 18       | 0      | Central Bureau of Statistics (Sudan), Federal Ministry of Health (Sudan), United Nations Children's Fund (UNICEF). Sudan Multiple Indicator Cluster Survey 2014. New York, United States: United Nations Children's Fund (UNICEF), 2016.                                                                                                                               | 200617  |

| Country    | Year | Data Type | Children Born | Polygons | Points | Citation                                                                                                                                                                                                                                                                                                                      | GHDx ID |
|------------|------|-----------|---------------|----------|--------|-------------------------------------------------------------------------------------------------------------------------------------------------------------------------------------------------------------------------------------------------------------------------------------------------------------------------------|---------|
| Suriname   | 2006 | SBH       | 10503         | 5        | 0      | General Statistical Office (Suriname), United Nations Children's Fund (UNICEF). Suriname Multiple Indicator Cluster Survey 2006. New York, United States: United Nations Children's Fund (UNICEF).                                                                                                                            | 12289   |
| Swaziland  | 2007 | CBH       | 11410         | 0        | 270    | Central Statistical Office (Swaziland), Macro International, Inc. Swaziland Demographic and Health Survey 2006-2007. Fairfax, United States: ICF International.                                                                                                                                                               | 20829   |
| Swaziland  | 2010 | CBH       | 9805          | 4        | 0      | Central Statistical Office (Swaziland), United Nations Children's Fund (UNICEF). Swaziland Multiple Indicator Cluster Survey 2010. New York, United States: United Nations Children's Fund (UNICEF).                                                                                                                          | 30325   |
| Swaziland  | 2014 | CBH       | 9830          | 4        | 0      | Central Statistical Office (Swaziland), United Nations Children's Fund (UNICEF), United Nations Educational, Scientific and Cultural Organization (UNESCO), United Nations Population Fund (UNFPA). Swaziland Multiple Indicator Cluster Survey 2014. New York, United States: United Nations Children's Fund (UNICEF), 2016. | 200707  |
| Syria      | 2006 | SBH       | 55015         | 60       | 0      | United Nations Children's Fund (UNICEF), Central Bureau of Statistics (Syria), Ministry of Health (Syria), Pan Arab Project for Family Health (PAPFAM). Syria Multiple Indicator Cluster Survey 2006. New York, United States: United Nations Children's Fund (UNICEF).                                                       | 12399   |
| Syria      | 2009 | CBH       | 7365          | 2        | 0      | Central Bureau of Statistics (Syria), League of Arab States. Syria Family Health Survey 2009.                                                                                                                                                                                                                                 | 126911  |
| Tajikistan | 2003 | CBH       | 13458         | 63       | 4      | National State Statistical Agency (Tajikistan), World Bank. Tajikistan Living Standards Measurement Survey 2003.                                                                                                                                                                                                              | 12489   |

| Country    | Year | Data Type | Children Born | Polygons | Points | Citation                                                                                                                                                                                                                                              | GHDx ID |
|------------|------|-----------|---------------|----------|--------|-------------------------------------------------------------------------------------------------------------------------------------------------------------------------------------------------------------------------------------------------------|---------|
| Tajikistan | 2005 | SBH       | 23127         | 5        | 0      | United Nations Children's Fund (UNICEF), State Committee on Statistics of the Republic of Tajikistan. Tajikistan Multiple Indicator Cluster Survey 2005. New York, United States: United Nations Children's Fund (UNICEF).                            | 12608   |
| Tajikistan | 2012 | CBH       | 19938         | 0        | 342    | ICF International, Ministry of Health (Tajikistan), Statistical Agency under the President of the Republic of Tajikistan. Tajikistan Demographic and Health Survey 2012. Fairfax, United States: ICF International, 2013.                             | 74460   |
| Tajikistan | 2017 | CBH       | 21985         | 0        | 365    | ICF International, Statistical Agency under the President of the Republic of Tajikistan. Tajikistan Demographic and Health Survey 2017. Fairfax, United States: ICF International, 2018.                                                              | 341838  |
| Tanzania   | 2002 | SBH       | 2664423       | 129      | 0      | National Bureau of Statistics (Tanzania), Minnesota Population Center. Tanzania Population and Housing Census 2002 from the Integrated Public Use Microdata Series, International: [Machine-readable database]. Minneapolis: University of Minnesota. | 43212   |
| Tanzania   | 2004 | SBH       | 33014         | 0        | 345    | National Bureau of Statistics (Tanzania), ORC Macro, Tanzania Commission for AIDS (TACAIDS). Tanzania AIDS Indicator Survey 2003-2004. Fairfax, United States: ICF International.                                                                     | 12630   |
| Tanzania   | 2005 | CBH       | 30557         | 26       | 0      | Macro International, Inc, National Bureau of Statistics (Tanzania). Tanzania Demographic and Health Survey 2004-2005. Fairfax, United States: ICF International.                                                                                      | 20875   |



| Country  | Year | Data Type | Children Born | Polygons | Points | Citation                                                                                                                                                                                                                                                                                                                                              | GHDx ID |
|----------|------|-----------|---------------|----------|--------|-------------------------------------------------------------------------------------------------------------------------------------------------------------------------------------------------------------------------------------------------------------------------------------------------------------------------------------------------------|---------|
| Tanzania | 2008 | CBH       | 27511         | 0        | 466    | Macro International, Inc, National Bureau of Statistics (Tanzania), Office of Chief Government Statistician (OCGS-Zanzibar), Tanzania Commission for AIDS (TACAIDS), Zanzibar AIDS Commission (ZAC). Tanzania HIV/AIDS and Malaria Indicator Survey 2007-2008. Fairfax, United States: ICF International.                                             | 12644   |
| Tanzania | 2010 | CBH       | 29777         | 0        | 458    | ICF Macro, National Bureau of Statistics (Tanzania). Tanzania Demographic and Health Survey 2009-2010. Fairfax, United States: ICF International.                                                                                                                                                                                                     | 21331   |
| Tanzania | 2012 | SBH       | 32522         | 0        | 573    | ICF International, National Bureau of Statistics (Tanzania), Office of Chief Government Statistician (OCGS-Zanzibar), Tanzania Commission for AIDS (TACAIDS), Zanzibar AIDS Commission (ZAC). Tanzania AIDS Indicator Survey 2011-2012. Fairfax, United States: ICF International, 2013.                                                              | 77395   |
| Tanzania | 2012 | SBH       | 3225395       | 169      | 0      | National Bureau of Statistics (Tanzania), Minnesota Population Center. Tanzania Population and Housing Census 2012 from the Integrated Public Use Microdata Series, International. Minneapolis: University of Minnesota, 2017.                                                                                                                        | 294725  |
| Tanzania | 2016 | CBH       | 37169         | 0        | 608    | ICF International, Ministry of Health (Zanzibar), Ministry of Health, Community Development, Gender, Elderly and Children (MoHCDEC) (Tanzania), National Bureau of Statistics (Tanzania), Office of Chief Government Statistician (OCGS-Zanzibar). Tanzania Demographic and Health Survey 2015-2016. Fairfax, United States: ICF International, 2016. | 218593  |

| Country  | Year | Data Type | Children Born | Polygons | Points | Citation                                                                                                                                                                                                                                                                                                                                                                                                                                                                                                                                                                                                                               | GHDx ID |
|----------|------|-----------|---------------|----------|--------|----------------------------------------------------------------------------------------------------------------------------------------------------------------------------------------------------------------------------------------------------------------------------------------------------------------------------------------------------------------------------------------------------------------------------------------------------------------------------------------------------------------------------------------------------------------------------------------------------------------------------------------|---------|
| Tanzania | 2017 | SBH       | 29279         | 29       | 0      | ICF International, Ministry of Health (Zanzibar), Ministry of Health, Community Development, Gender, Elderly and Children (MoHCDEC) (Tanzania), National Bureau of Statistics (Tanzania), Office of Chief Government Statistician (OCGS-Zanzibar). Tanzania Malaria Indicator Survey 2017. Fairfax, United States: ICF International, 2018.                                                                                                                                                                                                                                                                                            | 350798  |
| Thailand | 2006 | SBH       | 48610         | 4        | 0      | National Statistical Office (Thailand), United Nations Children's Fund (UNICEF). Thailand Multiple Indicator Cluster Survey 2005-2006. New York, United States: United Nations Children's Fund (UNICEF).                                                                                                                                                                                                                                                                                                                                                                                                                               | 12732   |
| Thailand | 2012 | SBH       | 30853         | 5        | 0      | College of Population Studies, Chulalongkorn University (Thailand), Institute for Population and Social Research, Mahidol University (Thailand), International Health Policy Program (Thailand), Ministry of Education (Thailand), Ministry of Public Health (Thailand), Ministry of Social Development and Human Security (MSDHS) (Thailand), National Health Security Office (Thailand), National Statistical Office (Thailand), Thai Health Promotion Foundation, United Nations Children's Fund (UNICEF). Thailand Multiple Indicator Cluster Survey 2012. New York, United States: United Nations Children's Fund (UNICEF), 2016. | 148649  |
| Thailand | 2015 | SBH       | 37245         | 1        | 0      | National Health Security Office (Thailand), National Statistical Office (Thailand), United Nations Children's Fund (UNICEF). Thailand Multiple Indicator Cluster Survey 2015-2016. New York, United States: United Nations Children's Fund (UNICEF), 2018.                                                                                                                                                                                                                                                                                                                                                                             | 296646  |

| Country     | Year | Data Type | Children Born | Polygons | Points | Citation                                                                                                                                                                                                                                                                                  | GHDx ID            |
|-------------|------|-----------|---------------|----------|--------|-------------------------------------------------------------------------------------------------------------------------------------------------------------------------------------------------------------------------------------------------------------------------------------------|--------------------|
| Thailand    | 2016 | SBH       | 3448          | 1        | 0      | National Health Security Office (Thailand), National Statistical Office (Thailand), United Nations Children's Fund (UNICEF). Thailand - Bangkok Small Community Multiple Indicator Cluster Survey 2016. New York, United States: United Nations Children's Fund (UNICEF), 2018.           | 331377             |
| The Gambia  | 2006 | SBH       | 27475         | 37       | 0      | Gambia Bureau of Statistics (GBOS), United Nations Children's Fund (UNICEF). Gambia Multiple Indicator Cluster Survey 2005-2006. New York, United States: United Nations Children's Fund (UNICEF).                                                                                        | 3935               |
| The Gambia  | 2010 | SBH       | 42194         | 6        | 0      | Gambia Bureau of Statistics (GBOS), United Nations Children's Fund (UNICEF). Gambia Multiple Indicator Cluster Survey 2010. New York, United States: United Nations Children's Fund (UNICEF), 2018.                                                                                       | 91506              |
| The Gambia  | 2013 | CBH       | 26601         | 37       | 0      | Gambia Bureau of Statistics (GBOS), ICF International, Ministry of Health and Social Welfare (Gambia). Gambia Demographic and Health Survey 2013. Fairfax, United States: ICF International, 2015.                                                                                        | 77384              |
| Timor-Leste | 2003 | CBH       | 17889         | 92       | 287    | ACIL Australia Pty Ltd., Australian National University, Ministry of Health (Timor-Leste), National Statistics Directorate (Timor-Leste), University of Newcastle (Australia). Timor-Leste Demographic and Health Survey 2003. Newcastle, Australia: University of Newcastle (Australia). | 20888 <sup>+</sup> |
| Timor-Leste | 2008 | SBH       | 14113         | 64       | 0      | National Statistics Directorate (Timor-Leste), World Bank. Timor-Leste Living Standards and Measurement Survey 2007-2008. Washington DC, United States: World Bank.                                                                                                                       | 46682              |

| Country     | Year | Data Type | Children Born | Polygons | Points | Citation                                                                                                                                                                                                                                                          | GHDx ID |
|-------------|------|-----------|---------------|----------|--------|-------------------------------------------------------------------------------------------------------------------------------------------------------------------------------------------------------------------------------------------------------------------|---------|
| Timor-Leste | 2010 | CBH       | 35998         | 13       | 0      | ICF Macro, Ministry of Finance (Timor-Leste), National Statistics Directorate (Timor-Leste). Timor-Leste Demographic and Health Survey 2009-2010. Fairfax, United States: ICF International.                                                                      | 21274   |
| Timor-Leste | 2016 | CBH       | 28682         | 0        | 455    | ICF International, National Statistics Directorate (Timor-Leste). Timor-Leste Demographic and Health Survey 2016. Fairfax, United States: ICF International, 2018.                                                                                                | 286785  |
| Togo        | 2006 | SBH       | 17832         | 6        | 0      | Directorate General of Statistics and National Accounting (Togo), United Nations Children's Fund (UNICEF). Togo Multiple Indicator Cluster Survey 2006. New York, United States: United Nations Children's Fund (UNICEF).                                         | 12896   |
| Togo        | 2010 | SBH       | 18954         | 6        | 0      | Directorate General of Statistics and National Accounting (Togo), United Nations Children's Fund (UNICEF). Togo Multiple Indicator Cluster Survey 2010. New York, United States: United Nations Children's Fund (UNICEF).                                         | 40021   |
| Togo        | 2013 | CBH       | 26264         | 0        | 330    | Directorate General of Statistics and National Accounts (Togo), ICF International, Ministry of Health (Togo), Ministry of Planning, Development and Zoning (Togo). Togo Demographic and Health Survey 2013-2014. Fairfax, United States: ICF International, 2015. | 77515   |
| Togo        | 2017 | SBH       | 13603         | 0        | 171    | ICF International, National Institute of Hygiene, Ministry of Health (Togo), National Institute of Statistics and Economic and Demographic Studies (INSEED) (Togo). Togo Malaria Indicator Survey 2017. Fairfax, United States: ICF International, 2018.          | 359318  |

| Country             | Year | Data Type | Children Born | Polygons | Points | Citation                                                                                                                                                                                                                                                                                                 | GHDx ID |
|---------------------|------|-----------|---------------|----------|--------|----------------------------------------------------------------------------------------------------------------------------------------------------------------------------------------------------------------------------------------------------------------------------------------------------------|---------|
| Trinidad and Tobago | 2006 | SBH       | 6551          | 15       | 0      | Central Statistical Office (Trinidad and Tobago) and United Nations Children's Fund (UNICEF). Trinidad and Tobago Multiple Indicator Cluster Survey 2006. New York, United States: United Nations Children's Fund (UNICEF).                                                                              | 12950   |
| Trinidad and Tobago | 2011 | SBH       | 35781         | 15       | 0      | Central Statistical Office (Trinidad and Tobago), Minnesota Population Center. Trinidad and Tobago Population and Housing Census 2011 from the Integrated Public Use Microdata Series, International [Machine-readable database]. Minneapolis: University of Minnesota, 2017.                            | 294807  |
| Trinidad and Tobago | 2011 | SBH       | 5617          | 5        | 0      | Central Statistical Office (Trinidad and Tobago), Ministry of Social Development and Family Services (Trinidad and Tobago), United Nations Children's Fund (UNICEF). Trinidad and Tobago Multiple Indicator Cluster Survey 2011. New York, United States: United Nations Children's Fund (UNICEF), 2018. | 332558  |
| Tunisia             | 2012 | CBH       | 13569         | 9        | 0      | Ministry of Regional Development and Planning (Tunisia), National Institute of Statistics (Tunisia), United Nations Children's Fund (UNICEF). Tunisia Multiple Indicator Cluster Survey 2011-2012. New York, United States: United Nations Children's Fund (UNICEF), 2014.                               | 76709   |
| Turkmenistan        | 2006 | SBH       | 12070         | 6        | 0      | Ministry of Foreign Affairs (Turkmenistan), Ministry of Health and Medical Industry (Turkmenistan), United Nations Children's Fund (UNICEF). Turkmenistan Multiple Indicator Cluster Survey 2006. New York, United States: United Nations Children's Fund (UNICEF), 2016.                                | 13064   |

| Country      | Year | Data Type | Children Born | Polygons | Points | Citation                                                                                                                                                                                                                                              | GHDx ID |
|--------------|------|-----------|---------------|----------|--------|-------------------------------------------------------------------------------------------------------------------------------------------------------------------------------------------------------------------------------------------------------|---------|
| Turkmenistan | 2016 | CBH       | 12800         | 6        | 0      | State Committee on Statistics of Turkmenistan, United Nations Children's Fund (UNICEF). Turkmenistan Multiple Indicator Cluster Survey 2015-2016. New York, United States: United Nations Children's Fund (UNICEF), 2017.                             | 264583  |
| Uganda       | 2001 | CBH       | 23410         | 0        | 266    | Macro International, Inc, Uganda Bureau of Statistics. Uganda Demographic and Health Survey 2000-2001. Fairfax, United States: ICF International.                                                                                                     | 20993   |
| Uganda       | 2002 | SBH       | 1811659       | 161      | 0      | Uganda Bureau of Statistics, Minnesota Population Center. Uganda Population and Housing Census 2002 from the Integrated Public Use Microdata Series, International: [Machine-readable database]. Minneapolis: University of Minnesota.                | 43328   |
| Uganda       | 2005 | SBH       | 36564         | 55       | 0      | Division of Reproductive Health, Centers for Disease Control and Prevention (CDC), Ministry of Health (Uganda). Uganda AIDS Indicator Survey 2004-2005.                                                                                               | 13084   |
| Uganda       | 2006 | CBH       | 30090         | 0        | 336    | Macro International, Inc, Uganda Bureau of Statistics. Uganda Demographic and Health Survey 2006. Fairfax, United States: ICF International.                                                                                                          | 21014   |
| Uganda       | 2010 | CBH       | 13863         | 0        | 170    | ICF Macro, Ministry of Health (Uganda), Mulago Hospital, Uganda Bureau of Statistics, United Nations Children's Fund (UNICEF), World Health Organization (WHO). Uganda Malaria Indicator Survey 2009-2010. Fairfax, United States: ICF International. | 13109   |
| Uganda       | 2010 | SBH       | 9416          | 7        | 328    | Uganda Bureau of Statistics. Uganda Living Standards Measurement Survey - Integrated Survey on Agriculture 2009-2010. Washington DC, United States: World Bank.                                                                                       | 81004   |

| Country    | Year | Data Type | Children Born | Polygons | Points | Citation                                                                                                                                                                                                                                                       | GHDx ID |
|------------|------|-----------|---------------|----------|--------|----------------------------------------------------------------------------------------------------------------------------------------------------------------------------------------------------------------------------------------------------------------|---------|
| Uganda     | 2011 | SBH       | 68086         | 0        | 470    | Centers for Disease Control and Prevention (CDC), ICF Macro, Ministry of Health (Uganda), Uganda Bureau of Statistics, Uganda Virus Research Institute. Uganda AIDS Indicator Survey 2011. Fairfax, United States: ICF International.                          | 55973   |
| Uganda     | 2011 | CBH       | 28609         | 0        | 400    | ICF Macro, Uganda Bureau of Statistics. Uganda Demographic and Health Survey 2011. Fairfax, United States: ICF International.                                                                                                                                  | 56021   |
| Uganda     | 2014 | SBH       | 6353          | 412      | 0      | Government of the Netherlands, Uganda Bureau of Statistics, World Bank. Uganda Living Standards Measurement Survey - Integrated Survey on Agriculture 2013-2014. Washington DC, United States: World Bank.                                                     | 264959  |
| Uganda     | 2015 | SBH       | 17128         | 0        | 208    | ICF International, National Malaria Control Program, Ministry of Health (Uganda), Uganda Bureau of Statistics. Uganda Malaria Indicator Survey 2014-2015. Fairfax, United States: ICF International.                                                           | 157065  |
| Uganda     | 2016 | CBH       | 56868         | 0        | 685    | ICF International, Uganda Bureau of Statistics. Uganda Demographic and Health Survey 2016. Fairfax, United States: ICF International, 2018.                                                                                                                    | 286780  |
| Uzbekistan | 2002 | CBH       | 11607         | 0        | 218    | Analytical and Information Center of the Ministry of Health of Uzbekistan, Macro International, Inc, Ministry of Macroeconomics and Statistics (Uzbekistan). Uzbekistan Special Demographic and Health Survey 2002. Fairfax, United States: ICF International. | 21039   |

| Country    | Year | Data Type | Children Born | Polygons | Points | Citation                                                                                                                                                                                                                                                   | GHDx ID |
|------------|------|-----------|---------------|----------|--------|------------------------------------------------------------------------------------------------------------------------------------------------------------------------------------------------------------------------------------------------------------|---------|
| Uzbekistan | 2006 | SBH       | 26751         | 6        | 0      | United Nations Children's Fund (UNICEF), State Committee of the Republic of Uzbekistan on Statistics. Uzbekistan Multiple Indicator Cluster Survey 2006. New York, United States: United Nations Children's Fund (UNICEF).                                 | 13445   |
| Venezuela  | 2001 | SBH       | 1176917       | 237      | 0      | National Institute of Statistics (Venezuela), Minnesota Population Center. Venezuela Population and Housing Census 2002 from the Integrated Public Use Microdata Series, International: [Machine-readable database]. Minneapolis: University of Minnesota. | 43412   |
| Vietnam    | 2002 | CBH       | 14383         | 41       | 0      | General Statistics Office (Vietnam), Macro International, Inc. Vietnam Demographic and Health Survey 2002. Fairfax, United States: ICF International.                                                                                                      | 21058   |
| Vietnam    | 2005 | SBH       | 20964         | 64       | 0      | General Statistics Office (Vietnam), National Institute of Hygiene and Epidemiology (Viet Nam), ORC Macro. Vietnam AIDS Indicator Survey 2005. Fairfax, United States: ICF International.                                                                  | 13544   |
| Vietnam    | 2006 | SBH       | 16447         | 8        | 0      | General Statistics Office (Vietnam), United Nations Children's Fund (UNICEF). Vietnam Multiple Indicator Cluster Survey 2006. New York, United States: United Nations Children's Fund (UNICEF).                                                            | 13719   |
| Vietnam    | 2009 | SBH       | 6004427       | 673      | 0      | General Statistics Office (Viet Nam), Minnesota Population Center. Viet Nam Population and Housing Census 2009 from the Integrated Public Use Microdata Series, International: [Machine-readable database]. Minneapolis: University of Minnesota.          | 43726   |



| Country | Year | Data Type | Children Born | Polygons | Points | Citation                                                                                                                                                                                                                      | GHDx ID |
|---------|------|-----------|---------------|----------|--------|-------------------------------------------------------------------------------------------------------------------------------------------------------------------------------------------------------------------------------|---------|
| Vietnam | 2011 | SBH       | 18127         | 6        | 0      | General Statistics Office (Vietnam), United Nations Children's Fund (UNICEF). Vietnam Multiple Indicator Cluster Survey 2010-2011. New York, United States: United Nations Children's Fund (UNICEF).                          | 57999   |
| Vietnam | 2014 | CBH       | 15479         | 6        | 0      | General Statistics Office (Vietnam), United Nations Children's Fund (UNICEF). Vietnam Multiple Indicator Cluster Survey 2013-2014. New York, United States: United Nations Children's Fund (UNICEF), 2015.                    | 152735  |
| Yemen   | 2003 | SBH       | 54378         | 20       | 0      | Central Statistical Organization (Yemen), League of Arab States, Ministry of Public Health and Population (Yemen), Pan Arab Project for Family Health (PAPFAM). Yemen Family Health Survey 2003.                              | 13795   |
| Yemen   | 2006 | CBH       | 17213         | 21       | 0      | Ministry of Health (Yemen) and United Nations Children's Fund (UNICEF). Yemen Multiple Indicator Cluster Survey 2006. New York, United States: United Nations Children's Fund (UNICEF).                                       | 13816   |
| Yemen   | 2013 | CBH       | 64602         | 21       | 0      | Central Statistical Organization (Yemen), ICF International, Ministry of Public Health and Population (Yemen). Yemen Demographic and Health Survey 2013. Fairfax, United States: ICF International.                           | 112500  |
| Yemen   | 2013 | SBH       | 60675         | 19       | 0      | Ministry of Planning and International Cooperation (Yemen), International Policy Center for Inclusive Growth, Interaction in Development (Yemen), UNICEF Yemen. Yemen National Social Protection Monitoring Survey 2012-2013. | 249499  |

| Country  | Year | Data Type | Children Born | Polygons | Points | Citation                                                                                                                                                                                                                                                                        | GHDx ID |
|----------|------|-----------|---------------|----------|--------|---------------------------------------------------------------------------------------------------------------------------------------------------------------------------------------------------------------------------------------------------------------------------------|---------|
| Zambia   | 2002 | CBH       | 23805         | 9        | 0      | Central Board of Health (Zambia), Central Statistical Office (Zambia), Macro International, Inc. Zambia Demographic and Health Survey 2001-2002. Fairfax, United States: ICF International.                                                                                     | 21102   |
| Zambia   | 2007 | CBH       | 21366         | 0        | 319    | Central Statistical Office (Zambia), Macro International, Inc. Zambia Demographic and Health Survey 2007. Fairfax, United States: ICF International.                                                                                                                            | 21117   |
| Zambia   | 2010 | SBH       | 768988        | 150      | 0      | Central Statistical Office (Zambia), Minnesota Population Center. Zambia Census 2010 from the Integrated Public Use Microdata Series, International: [Machine-readable database]. Minneapolis: University of Minnesota.                                                         | 151326  |
| Zambia   | 2014 | CBH       | 49207         | 0        | 719    | Central Statistical Office (Zambia), ICF International, Ministry of Health (Zambia), Tropical Diseases Research Centre, University Teaching Hospital (Zambia), University of Zambia. Zambia Demographic and Health Survey 2013-2014. Fairfax, United States: ICF International. | 77516   |
| Zimbabwe | 2006 | CBH       | 19489         | 0        | 396    | Central Statistical Office (Zimbabwe), Macro International, Inc. Zimbabwe Demographic and Health Survey 2005-2006. Calverton, United States: Macro International, Inc.                                                                                                          | 21163   |
| Zimbabwe | 2009 | CBH       | 23716         | 10       | 0      | Central Statistical Office (Zimbabwe). Zimbabwe Multiple Indicator Monitoring Survey 2009. New York, United States: United Nations Children's Fund (UNICEF).                                                                                                                    | 35493   |
| Zimbabwe | 2011 | CBH       | 19279         | 0        | 393    | ICF Macro, Zimbabwe National Statistics Agency. Zimbabwe Demographic and Health Survey 2010-2011. Calverton, United States: ICF Macro, 2012.                                                                                                                                    | 55992   |

| Country  | Year | Data Type | Children Born | Polygons | Points | Citation                                                                                                                                                                                                                                                                               | GHDx ID |
|----------|------|-----------|---------------|----------|--------|----------------------------------------------------------------------------------------------------------------------------------------------------------------------------------------------------------------------------------------------------------------------------------------|---------|
| Zimbabwe | 2012 | SBH       | 312920        | 88       | 0      | National Statistical Agency (Zimbabwe), Minnesota Population Center. Zimbabwe Population Census 2012 from the Integrated Public Use Microdata Series, International. Minneapolis, MN: IPUMS, 2018. <a href="https://doi.org/10.18128/D020.V7.1">https://doi.org/10.18128/D020.V7.1</a> | 367747  |
| Zimbabwe | 2014 | CBH       | 32285         | 10       | 0      | United Nations Children's Fund (UNICEF), Zimbabwe National Statistics Agency. Zimbabwe Multiple Indicator Cluster Survey 2014. New York, United States: United Nations Children's Fund (UNICEF), 2015.                                                                                 | 152720  |
| Zimbabwe | 2015 | CBH       | 20791         | 0        | 400    | ICF International, National Microbiology Reference Laboratory, Harare Central Hospital (NMRL) (Zimbabwe), Zimbabwe National Statistics Agency. Zimbabwe Demographic and Health Survey 2015. Fairfax, United States: ICF International, 2016.                                           | 157066  |

1282

1283

1284

1285

1286

1287

1288

1289

1290

1291

1292

1293

1294

1295

| Country      | Year      | Data Type | Reason                                                                                | Citation                                                                                                                                                                                                                                                                                                                                                                                                                       | GHDx ID |
|--------------|-----------|-----------|---------------------------------------------------------------------------------------|--------------------------------------------------------------------------------------------------------------------------------------------------------------------------------------------------------------------------------------------------------------------------------------------------------------------------------------------------------------------------------------------------------------------------------|---------|
| Bangladesh   | 2010-2013 | SBH       | Excluded for multiple visits to same household                                        | Fogarty International Center, National Institutes of Health (NIH), Foundation for the National Institutes of Health (FNIH), International Centre for Diarrhoeal Disease Research, Bangladesh (ICDDR,B). Bangladesh - Dhaka Malnutrition and Enteric Disease Study 2009-2014.                                                                                                                                                   | 261683  |
| Bhutan       | 2005      | SBH       | Unable to geomatch                                                                    | Office of the Census Commissioner (Bhutan). Bhutan Population and Housing Census 2005. Thimphu, Bhutan: Office of the Census Commissioner (Bhutan), 2006.                                                                                                                                                                                                                                                                      | 1175    |
| Burkina Faso | 2008      | CBH       | Only has CBH for <5                                                                   | Global Fund to Fight Aids Tuberculosis and Malaria (GFATM). Burkina Faso Global Fund Household Health Coverage Survey 2008.                                                                                                                                                                                                                                                                                                    | 26642   |
| Burkina Faso | 2015      | SBH       | Excluded pma2020 for inflated mortality and high missingness in reported child deaths | Burkina Faso Institut national de la statistique et de la demographie (National Institute of Statistics and Demography), and The Bill & Melinda Gates Institute for Population and Reproductive Health at The Johns Hopkins Bloomberg School of Public Health. Performance Monitoring and Accountability 2020 (PMA2020) Survey round 2, PMA2015/Burkina Faso-R2. 2015. Ouagadougou, Burkina Faso and Baltimore, Maryland, USA. | 257045  |
| Burkina Faso | 2016      | SBH       | Excluded pma2020 for inflated mortality and high missingness in reported child deaths | Burkina Faso Institut national de la statistique et de la demographie (National Institute of Statistics and Demography), and The Bill & Melinda Gates Institute for Population and Reproductive Health at The Johns Hopkins Bloomberg School of Public Health. Performance Monitoring and Accountability 2020 (PMA2020) Survey round 3, PMA2016/Burkina Faso-R3. 2016. Ouagadougou, Burkina Faso and Baltimore, Maryland, USA. | 285993  |

| Country      | Year      | Data Type | Reason                                                                                | Citation                                                                                                                                                                                                                                                                                                                                                                                                                       | GHDx ID |
|--------------|-----------|-----------|---------------------------------------------------------------------------------------|--------------------------------------------------------------------------------------------------------------------------------------------------------------------------------------------------------------------------------------------------------------------------------------------------------------------------------------------------------------------------------------------------------------------------------|---------|
| Burkina Faso | 2016-2017 | SBH       | Excluded pma2020 for inflated mortality and high missingness in reported child deaths | Burkina Faso Institut national de la statistique et de la demographie (National Institute of Statistics and Demography), and The Bill & Melinda Gates Institute for Population and Reproductive Health at The Johns Hopkins Bloomberg School of Public Health. Performance Monitoring and Accountability 2020 (PMA2020) Survey round 4, PMA2016/Burkina Faso-R4. 2016. Ouagadougou, Burkina Faso and Baltimore, Maryland, USA. | 307751  |
| Burkina Faso | 2017-2018 | SBH       | Excluded pma2020 for inflated mortality and high missingness in reported child deaths | Burkina Faso Institut national de la statistique et de la demographie (National Institute of Statistics and Demography), and The Bill & Melinda Gates Institute for Population and Reproductive Health at The Johns Hopkins Bloomberg School of Public Health. Performance Monitoring and Accountability 2020 (PMA2020) Survey round 5, PMA2017/Burkina Faso-R5. 2017. Ouagadougou, Burkina Faso and Baltimore, Maryland, USA. | 375719  |
| Cambodia     | 2003-2005 | SBH       | Excluded due to high number missing interview dates                                   | National Institute of Statistics (Cambodia), Statistics Sweden. Cambodia Socio-Economic Survey 2003-2005. Phnom Penh, Cambodia: National Institute of Statistics (Cambodia).                                                                                                                                                                                                                                                   | 30963   |
| Cambodia     | 2004      | SBH       | These age ranges dont match training data for SBH-CBH model                           | Institute for Social Research, University of Michigan. Cambodia Elderly Survey 2004. Ann Arbor, United States: Institute for Social Research, University of Michigan.                                                                                                                                                                                                                                                          | 135505  |
| Cambodia     | 2008      | CBH       | CBH has unreasonably low mortality                                                    | National Institute of Statistics (Cambodia). Cambodia Anthropometric Survey 2008 - National Institute of Statistics. Phnom Penh, Cambodia: National Institute of Statistics (Cambodia), 2011.                                                                                                                                                                                                                                  | 135773  |

| Country                          | Year | Data Type | Reason                                                                                | Citation                                                                                                                                                                                                                                                                                                                                                                                                                                                                           | GHDx ID |
|----------------------------------|------|-----------|---------------------------------------------------------------------------------------|------------------------------------------------------------------------------------------------------------------------------------------------------------------------------------------------------------------------------------------------------------------------------------------------------------------------------------------------------------------------------------------------------------------------------------------------------------------------------------|---------|
| Cameroon                         | 2001 | SBH       | Low N and unrealistic age trend of CEB/CED                                            | National Institute of Statistics (Cameroon), Directorate of Statistics and National Accounts, Ministry of Economics and Finance (Cameroon), AFRISTAT. Cameroon Household Survey 2001. Yaounde, Cameroon: National Institute of Statistics (Cameroon).                                                                                                                                                                                                                              | 2039    |
| Colombia                         | 2008 | SBH       | Need age of woman to use SBH                                                          | National Administrative Department of Statistics (Colombia). Colombia National Quality of Life Survey 2008. Bogotá, Colombia: National Administrative Department of Statistics (Colombia).                                                                                                                                                                                                                                                                                         | 68235   |
| Cote d'Ivoire                    | 2006 | SBH       | Poor quality dataset, CEB values negative                                             | United Nations Children's Fund (UNICEF), National Institute of Statistics (Cote d'Ivoire). Cote d'Ivoire Multiple Indicator Cluster Survey 2006. New York, United States: United Nations Children's Fund (UNICEF).                                                                                                                                                                                                                                                                 | 26433   |
| Cote d'Ivoire                    | 2017 | SBH       | Excluded pma2020 for inflated mortality and high missingness in reported child deaths | Institut National de la Statistique de la Cote d'Ivoire (INS-Cote d'Ivoire), La Direction de Coordination du Programme National de Sante de la Mere et de l'Enfant (DC-PNSME), and The Bill & Melinda Gates Institute for Population and Reproductive Health at The Johns Hopkins Bloomberg School of Public Health. Performance Monitoring and Accountability 2020 (PMA2020) Survey round 1, PMA2017/Cote d'Ivoire-R1. 2017. Abidjan, Cote d'Ivoire and Baltimore, Maryland, USA. | 350350  |
| Democratic Republic of the Congo | 2015 | SBH       | Excluded pma2020 for inflated mortality and high missingness in reported child deaths | Tulane University School of Public Health, University of Kinshasa School of Public Health and The Bill & Melinda Gates Institute for Population and Reproductive Health at The Johns Hopkins Bloomberg School of Public Health. Performance Monitoring and Accountability 2020 (PMA2020) Survey round 3, PMA2015/DRC-R3 (Kinshasa). 2015. Kinshasa, DRC and Baltimore, Maryland, USA.                                                                                              | 257826  |

| Country                          | Year      | Data Type | Reason                                                                                | Citation                                                                                                                                                                                                                                                                                                                                                                                              | GHDx ID |
|----------------------------------|-----------|-----------|---------------------------------------------------------------------------------------|-------------------------------------------------------------------------------------------------------------------------------------------------------------------------------------------------------------------------------------------------------------------------------------------------------------------------------------------------------------------------------------------------------|---------|
| Democratic Republic of the Congo | 2015-2016 | SBH       | Excluded pma2020 for inflated mortality and high missingness in reported child deaths | Tulane University School of Public Health, University of Kinshasa School of Public Health and The Bill & Melinda Gates Institute for Population and Reproductive Health at The Johns Hopkins Bloomberg School of Public Health. Performance Monitoring and Accountability 2020 (PMA2020) Survey round 4, PMA2015/DRC-R4 (Kinshasa & Kongo Central). 2015. Kinshasa, DRC and Baltimore, Maryland, USA. | 286019  |
| Democratic Republic of the Congo | 2016      | SBH       | Excluded pma2020 for inflated mortality and high missingness in reported child deaths | Tulane University School of Public Health, University of Kinshasa School of Public Health and The Bill & Melinda Gates Institute for Population and Reproductive Health at The Johns Hopkins Bloomberg School of Public Health. Performance Monitoring and Accountability 2020 (PMA2020) Survey round 5, PMA2016/DRC-R5 (Kinshasa & Kongo Central). 2016. Kinshasa, DRC and Baltimore, Maryland, USA. | 286054  |
| Djibouti                         | 2012      | CBH       | missing birth or death date exceeded 10% (Africa Paper)                               | Department of Statistics and Demographic Studies (Djibouti), League of Arab States, Ministry of Health (Djibouti), Pan Arab Project for Family Health (PAPFAM). Djibouti Family Health Survey 2012.                                                                                                                                                                                                   | 218035  |
| Ecuador                          | 2012      | CBH       | Excluded, no age of death in dataset                                                  | Ministry of Public Health (Ecuador), National Institute of Statistics and Censuses (Ecuador). Ecuador National Health and Nutrition Survey 2012.                                                                                                                                                                                                                                                      | 153674  |
| Egypt                            | 2013-2014 | SBH       | Excluded due to high number missing ced                                               | El-Zanaty and Associates, Ministry of Health and Population (Egypt), United Nations Children's Fund (UNICEF). Egypt IPHN Rural Districts Multiple Indicator Cluster Survey 2013-2014. New York, United States: United Nations Children's Fund (UNICEF), 2016.                                                                                                                                         | 159617  |

| Country  | Year      | Data Type | Reason                                                                                                          | Citation                                                                                                                                                                                                                                                                                                                                                                                                                                        | GHDx ID |
|----------|-----------|-----------|-----------------------------------------------------------------------------------------------------------------|-------------------------------------------------------------------------------------------------------------------------------------------------------------------------------------------------------------------------------------------------------------------------------------------------------------------------------------------------------------------------------------------------------------------------------------------------|---------|
| Ethiopia | 2007      | SBH       | 80% missingness in SBH data and unrealistic geographic distribution of mortality risk (Excluded in prior paper) | Minnesota Population Center, Ethiopia Central Statistical Agency. Ethiopia Population and Housing Census 2007 from the Integrated Public Use Microdata Series, International: [Machine-readable database]. Minneapolis: University of Minnesota, 2015.                                                                                                                                                                                          | 227133  |
| Ethiopia | 2008      | CBH       | Only has CBH for <5                                                                                             | Ethiopian Health and Nutrition Research Center (EHNRI), Macro International, Inc, Ministry of Health (Ethiopia). Ethiopia Global Fund Household Health Coverage Survey 2008.                                                                                                                                                                                                                                                                    | 26661   |
| Ethiopia | 2016      | SBH       | Excluded pma2020 for inflated mortality and high missingness in reported child deaths                           | Addis Ababa University School of Public Health and The Bill & Melinda Gates Institute for Population and Reproductive Health at The Johns Hopkins Bloomberg School of Public Health. Performance Monitoring and Accountability 2020 (PMA2020) Survey round 4, PMA2016/Ethiopia-R4. 2016. Ethiopia and Baltimore, Maryland, USA. PMA2020) Survey round 3, PMA2016/Burkina Faso-R3. 2016. Ouagadougou, Burkina Faso and Baltimore, Maryland, USA. | 285891  |
| Ethiopia | 2017      | SBH       | Excluded pma2020 for inflated mortality and high missingness in reported child deaths                           | Addis Ababa University School of Public Health and The Bill & Melinda Gates Institute for Population and Reproductive Health at The Johns Hopkins Bloomberg School of Public Health. Performance Monitoring and Accountability 2020 (PMA2020) Survey round 5, PMA2017/Ethiopia-R5. 2017. Ethiopia and Baltimore, Maryland, USA.                                                                                                                 | 347050  |
| Ghana    | 2009-2010 | SBH       | Need age of woman to use SBH                                                                                    | Economic Growth Center, Yale University, Institute of Statistical, Social and Economic Research, University of Ghana. Ghana Socioeconomic Panel Survey 2009-2010. Washington DC, United States: World Bank.                                                                                                                                                                                                                                     | 236205  |



| Country       | Year | Data Type | Reason                                                                                | Citation                                                                                                                                                                                                                                                                                                                                                                                                                                                                                                          | GHDx ID |
|---------------|------|-----------|---------------------------------------------------------------------------------------|-------------------------------------------------------------------------------------------------------------------------------------------------------------------------------------------------------------------------------------------------------------------------------------------------------------------------------------------------------------------------------------------------------------------------------------------------------------------------------------------------------------------|---------|
| Ghana         | 2014 | SBH       | Excluded pma2020 for inflated mortality and high missingness in reported child deaths | Kwame Nkrumah University of Science & Technology School of Medicine and The Bill & Melinda Gates Institute for Population and Reproductive Health at The Johns Hopkins Bloomberg School of Public Health. Performance Monitoring and Accountability 2020 (PMA2020) Survey round 3, PMA2014/Ghana-R3. 2014. Ghana and Baltimore, Maryland, USA.                                                                                                                                                                    | 256243  |
| Ghana         | 2015 | SBH       | Excluded pma2020 for inflated mortality and high missingness in reported child deaths | Bill and Melinda Gates Institute for Population and Reproductive Health, Johns Hopkins Bloomberg School of Public Health, Ghana Health Service, Ghana Statistical Service, Kwame Nkrumah University of Science and Technology (KNUST), University for Development Studies (Ghana). Ghana Performance Monitoring and Accountability 2020 Survey, Round 4 2015. Baltimore, United States: Bill and Melinda Gates Institute for Population and Reproductive Health, Johns Hopkins Bloomberg School of Public Health. | 256244  |
| Ghana         | 2016 | SBH       | Excluded pma2020 for inflated mortality and high missingness in reported child deaths | Kwame Nkrumah University of Science & Technology School of Medicine and The Bill & Melinda Gates Institute for Population and Reproductive Health at The Johns Hopkins Bloomberg School of Public Health. Performance Monitoring and Accountability 2020 (PMA2020) Survey round 5, PMA2016/Ghana-R5. 2016. Ghana and Baltimore, Maryland, USA.                                                                                                                                                                    | 286146  |
| Guinea-Bissau | 2010 | SBH       | Excluded due to high number missing ced                                               | Centers for Disease Control and Prevention (CDC), National Statistics Institute (Guinea-Bissau), United Nations Children's Fund (UNICEF). Guinea-Bissau Multiple Indicator Cluster Survey 2010. New York, United States: United Nations Children's Fund (UNICEF), 2018.                                                                                                                                                                                                                                           | 27215   |

| Country   | Year      | Data Type | Reason                                                                                | Citation                                                                                                                                                                                                                                                                                                 | GHDx ID |
|-----------|-----------|-----------|---------------------------------------------------------------------------------------|----------------------------------------------------------------------------------------------------------------------------------------------------------------------------------------------------------------------------------------------------------------------------------------------------------|---------|
| India     | 2005      | CBH       | Missingness, small sample size, and convoluted sampling methods                       | Desai, Sonalde, Reeve Vanneman, and National Council of Applied Economic Research, New Delhi. India Human Development Survey (IHDS), 2005. ICPSR22626-v8. Ann Arbor, MI: Inter-university Consortium for Political and Social Research [distributor], 2010-06-29. doi:10.3886/ICPSR22626.v8.             | 26919   |
| India     | 2010      | SBH       | These age ranges dont match training data for SBH-CBH model                           | Harvard School of Public Health, International Institute for Population Sciences (India), RAND Corporation. India Longitudinal Aging Study Pilot 2010.                                                                                                                                                   | 174154  |
| India     | 2011-2012 | CBH       | Missingness, small sample size, and convoluted sampling methods                       | Desai, Sonalde, and Reeve Vanneman. India Human Development Survey-II (IHDS-II), 2011-12. ICPSR36151-v5. Ann Arbor, MI: Inter-university Consortium for Political and Social Research [distributor], 2016-08-01. <a href="http://doi.org/10.3886/ICPSR36151.v5">http://doi.org/10.3886/ICPSR36151.v5</a> | 165498  |
| Indonesia | 2000      | CBH       | Excluded due to high number missing date of birth, skewed births towards past 5 years | Center for Population and Policy Studies, Gadjah Mada University (Indonesia), RAND Corporation. Indonesia Family Life Survey 2000. Santa Monica, United States: RAND Corporation.                                                                                                                        | 6111    |
| Indonesia | 2000      | CBH       | Excluded due to high number missing date of birth                                     | Statistics Indonesia. Indonesia Population and Housing Census 2000.                                                                                                                                                                                                                                      | 22674   |
| Indonesia | 2005      | CBH       | Excluded due to high number missing date of birth                                     | Statistics Indonesia. Indonesia Intercensal Population Survey 2005.                                                                                                                                                                                                                                      | 6547    |
| Indonesia | 2007-2008 | CBH       | Excluded due to high number missing date of birth, skewed births towards past 5 years | Center for Population and Policy Studies, Gadjah Mada University (Indonesia), RAND Corporation, SurveyMETER. Indonesia Family Life Survey 2007-2008. Santa Monica, United States: RAND Corporation.                                                                                                      | 6464    |
| Indonesia | 2012      | CBH       | Excluded due to high number missing date of birth                                     | National Team for the Acceleration of Poverty Reduction (TNP2K) (Indonesia), SurveyMETER, University of Southern California, World Bank. Indonesia Family Life Survey East 2012.                                                                                                                         | 219201  |

| Country   | Year      | Data Type | Reason                                                             | Citation                                                                                                                                                                                                                                                                                     | GHDx ID |
|-----------|-----------|-----------|--------------------------------------------------------------------|----------------------------------------------------------------------------------------------------------------------------------------------------------------------------------------------------------------------------------------------------------------------------------------------|---------|
| Indonesia | 2014-2015 | CBH       | Excluded due to high number missing date of birth                  | RAND Corporation, SurveyMETER. Indonesia Family Life Survey 2014-2015. Santa Monica, United States: RAND Corporation, 2016.                                                                                                                                                                  | 264956  |
| Kenya     | 2009      | SBH       | Not representative sample                                          | Kenya National Bureau of Statistics, United Nations Children's Fund (UNICEF). Kenya - Coast Multiple Indicator Cluster Survey 2009. New York, United States: United Nations Children's Fund (UNICEF), 2014.                                                                                  | 56420   |
| Kenya     | 2012-2013 | CBH       | Only collected data on youngest 3 children                         | Kenya National Bureau of Statistics, Ministry of Devolution and Planning (Kenya), Ministry of Health (Kenya), National AIDS and STI Control Program (Kenya). Kenya AIDS Indicator Survey 2012-2013. Nairobi, Kenya: Kenya National Bureau of Statistics.                                     | 133304  |
| Kenya     | 2013-2014 | CBH       | missing birth or death date exceeded 10% (Excluded in prior paper) | Kenya National Bureau of Statistics, Population Studies and Research Institute, University of Nairobi (Kenya), United Nations Children's Fund (UNICEF). Kenya - Bungoma County Multiple Indicator Survey 2013-2014. New York, United States: United Nations Children's Fund (UNICEF), 2015.  | 203654  |
| Kenya     | 2013-2014 | CBH       | missing birth or death date exceeded 10% (Excluded in prior paper) | Kenya National Bureau of Statistics, Population Studies and Research Institute, University of Nairobi (Kenya), United Nations Children's Fund (UNICEF). Kenya - Kakamega County Multiple Indicator Survey 2013-2014. New York, United States: United Nations Children's Fund (UNICEF), 2015. | 203663  |
| Kenya     | 2013-2014 | CBH       | missing birth or death date exceeded 10% (Excluded in prior paper) | Kenya National Bureau of Statistics, Population Studies and Research Institute, University of Nairobi (Kenya), United Nations Children's Fund (UNICEF). Kenya - Turkana County Multiple Indicator Survey 2013-2014. New York, United States: United Nations Children's Fund (UNICEF), 2015.  | 203664  |

| Country  | Year      | Data Type | Reason                                                                                | Citation                                                                                                                                                                                                                                                                                                                              | GHDx ID |
|----------|-----------|-----------|---------------------------------------------------------------------------------------|---------------------------------------------------------------------------------------------------------------------------------------------------------------------------------------------------------------------------------------------------------------------------------------------------------------------------------------|---------|
| Kenya    | 2015      | SBH       | Excluded pma2020 for inflated mortality and high missingness in reported child deaths | International Centre for Reproductive Health Kenya (ICRHK) and The Bill & Melinda Gates Institute for Population and Reproductive Health at The Johns Hopkins Bloomberg School of Public Health. Performance Monitoring and Accountability 2020 (PMA2020) Survey round 3, PMA2015/Kenya-R3. 2015. Kenya and Baltimore, Maryland, USA. | 256365  |
| Kenya    | 2015      | SBH       | Excluded pma2020 for inflated mortality and high missingness in reported child deaths | International Centre for Reproductive Health Kenya (ICRHK) and The Bill & Melinda Gates Institute for Population and Reproductive Health at The Johns Hopkins Bloomberg School of Public Health. Performance Monitoring and Accountability 2020 (PMA2020) Survey round 4, PMA2015/Kenya-R4. 2015. Kenya and Baltimore, Maryland, USA. | 256366  |
| Kenya    | 2016      | SBH       | Excluded pma2020 for inflated mortality and high missingness in reported child deaths | International Centre for Reproductive Health Kenya (ICRHK) and The Bill & Melinda Gates Institute for Population and Reproductive Health at The Johns Hopkins Bloomberg School of Public Health. Performance Monitoring and Accountability 2020 (PMA2020) Survey round 5, PMA2016/Kenya-R5. 2016. Kenya and Baltimore, Maryland, USA. | 347047  |
| Malawi   | 2007-2008 | CBH       | No SBH mortality and CBH only for children died                                       | Ministry of Economic Planning and Development (Malawi), National Statistical Office of Malawi. Malawi Global Fund Household Health Coverage Survey 2007-2008.                                                                                                                                                                         | 26683   |
| Mongolia | 2008      | SBH       | Unable to geomatch                                                                    | Ministry of Health (Mongolia), National Statistical Office of Mongolia. Mongolia Reproductive Health Survey 2008. Ulaanbaatar, Mongolia: National Statistical Office of Mongolia.                                                                                                                                                     | 125230  |

| Country | Year      | Data Type | Reason                                                                                                                                                                     | Citation                                                                                                                                                                                                                                                                                                                                                                          | GHDx ID |
|---------|-----------|-----------|----------------------------------------------------------------------------------------------------------------------------------------------------------------------------|-----------------------------------------------------------------------------------------------------------------------------------------------------------------------------------------------------------------------------------------------------------------------------------------------------------------------------------------------------------------------------------|---------|
| Nepal   | 2010-2013 | SBH       | Excluded for multiple visits to same household                                                                                                                             | Fogarty International Center, National Institutes of Health (NIH), Foundation for the National Institutes of Health (FNIH), Institute of Medicine, Tribhuvan University, University of Bergen, Walter Reed/AFRIMS Research Unit Nepal (WARUN). Nepal - Bhaktapur Malnutrition and Enteric Disease Study 2009-2014.                                                                | 261880  |
| Niger   | 2012      | CBH       | dropped points from Diffa region for discordance with data points from the same surveys in nearby regions with similar sociodemographic profiles (Excluded in prior paper) | ICF International, Ministry of Public Health (Niger), National Institute of Statistics (Niger). Niger Demographic and Health Survey 2012. Fairfax, United States: ICF International.                                                                                                                                                                                              | 74393   |
| Niger   | 2017      | SBH       | Excluded pma2020 for inflated mortality and high missingness in reported child deaths                                                                                      | Niger/Niamey Institut National de la Statistique (National Institute of Statistics) and The Bill & Melinda Gates Institute for Population and Reproductive Health at The Johns Hopkins Bloomberg School of Public Health. Performance Monitoring and Accountability 2020 (PMA2020) Survey round 4, PMA2017/Niger-R4 (National). 2017. Niamey, Niger and Baltimore, Maryland, USA. | 349890  |
| Nigeria | 2007      | SBH       | Excluded, over 50% missingness in ceb and ced                                                                                                                              | National Bureau of Statistics (Nigeria), Minnesota Population Center. Nigeria General Household Survey 2007 from the Integrated Public Use Microdata Series, International: [Machine-readable database]. Minneapolis: University of Minnesota.                                                                                                                                    | 151312  |
| Nigeria | 2008      | SBH       | Large amounts of missing data                                                                                                                                              | National Bureau of Statistics (Nigeria), Minnesota Population Center. Nigeria General Household Survey 2008 from the Integrated Public Use Microdata Series, International: [Machine-readable database]. Minneapolis: University of Minnesota.                                                                                                                                    | 151313  |

| Country   | Year      | Data Type | Reason                                                                                                                                                                                   | Citation                                                                                                                                                                                                                                                                                                                                                                                   | GHDx ID |
|-----------|-----------|-----------|------------------------------------------------------------------------------------------------------------------------------------------------------------------------------------------|--------------------------------------------------------------------------------------------------------------------------------------------------------------------------------------------------------------------------------------------------------------------------------------------------------------------------------------------------------------------------------------------|---------|
| Nigeria   | 2009      | SBH       | Data appeared unreliable with multiple rows stating persons aged <5 to have given birth to multiple children. Choosing not to use as have good quality data for 2008 and 2010. Excluded. | National Bureau of Statistics (Nigeria), Minnesota Population Center. Nigeria General Household Survey 2009 from the Integrated Public Use Microdata Series, International: [Machine-readable database]. Minneapolis: University of Minnesota.                                                                                                                                             | 151314  |
| Nigeria   | 2010      | SBH       | Unrealistic distribution of CED                                                                                                                                                          | National Bureau of Statistics (Nigeria). Nigeria Living Standards Survey 2008-2010. Abuja, Nigeria: National Bureau of Statistics (Nigeria).                                                                                                                                                                                                                                               | 151719  |
| Nigeria   | 2016      | SBH       | Excluded pma2020 for inflated mortality and high missingness in reported child deaths                                                                                                    | Centre for Research, Evaluation Resources and Development (CRERD), Bayero University Kano (BUK), and The Bill & Melinda Gates Institute for Population and Reproductive Health at The Johns Hopkins Bloomberg School of Public Health. Performance Monitoring and Accountability 2020 (PMA2020) Survey round 3, PMA2016/Nigeria-R3 (National). 2016. Nigeria and Baltimore, Maryland, USA. | 286022  |
| Pakistan  | 2010-2013 | SBH       | Excluded for multiple visits to same household                                                                                                                                           | Aga Khan University, Fogarty International Center, National Institutes of Health (NIH), Foundation for the National Institutes of Health (FNIH). Pakistan - Naushahro Feroze Malnutrition and Enteric Disease Study 2009-2014.                                                                                                                                                             | 261883  |
| Palestine | 2007      | SBH       | Missing ced, ages are binned to 5yrs, Have CBH in this year                                                                                                                              | Palestinian Central Bureau of Statistics, Minnesota Population Center. Palestine Population, Housing, and Establishment Census 2007 from the Integrated Public Use Microdata Series, International: [Machine-readable database]. Minneapolis: University of Minnesota, 2011.                                                                                                               | 41088   |
| Palestine | 2007-2008 | SBH       | Excluded as IPUMS has this data and this data has spuriously high CED                                                                                                                    | Palestinian Central Bureau of Statistics. Palestine Population, Housing and Establishment Census 2007-2008.                                                                                                                                                                                                                                                                                | 10040   |

| Country      | Year      | Data Type | Reason                                                             | Citation                                                                                                                                                                                                                                                                                                                                                                           | GHDx ID |
|--------------|-----------|-----------|--------------------------------------------------------------------|------------------------------------------------------------------------------------------------------------------------------------------------------------------------------------------------------------------------------------------------------------------------------------------------------------------------------------------------------------------------------------|---------|
| Paraguay     | 2010      | SBH       | Only has SBH for <15                                               | General Directorate of Statistics, Surveys and Censuses (Paraguay). Paraguay Permanent Household Survey 2010. Asunción, Paraguay: General Directorate of Statistics, Surveys and Censuses (Paraguay).                                                                                                                                                                              | 243537  |
| Peru         | 2010-2013 | SBH       | Excluded for multiple visits to same household                     | Fogarty International Center, National Institutes of Health (NIH), Foundation for the National Institutes of Health (FNIH), Johns Hopkins Bloomberg School of Public Health. Peru - Loreto Malnutrition and Enteric Disease Study 2009-2014.                                                                                                                                       | 261879  |
| Somalia      | 2011      | CBH       | missing birth or death date exceeded 10% (Excluded in prior paper) | Puntland Ministry of Planning and International Cooperation (Somalia), United Nations Children's Fund (UNICEF). Somalia - Northeast Zone Multiple Indicator Cluster Survey 2011. New York, United States: United Nations Children's Fund (UNICEF), 2015.                                                                                                                           | 91508   |
| South Africa | 2004      | SBH       | Excluded due to high number missing ced                            | University of Kwazulu-Natal, University of Wisconsin, London School of Hygiene and Tropical Medicine, International Food Policy Research Institute (IFPRI), Department of Social Development (South Africa), Norwegian Institute for Urban and Regional Research (NIBR). South Africa KwaZulu-Natal Income Dynamics Study 2004. Durban, South Africa: University of Kwazulu-Natal. | 31142   |
| South Africa | 2008      | SBH       | Survey series revisits households                                  | University of Cape Town, Southern Africa Labour and Development Research Unit. National Income Dynamics Study (NIDS) Wave 1 [computer files]. Cape Town: Southern Africa Labour and Development Research Unit [producer], 2009. Cape Town: DataFirst [distributor], 2009                                                                                                           | 27885   |

| Country      | Year      | Data Type | Reason                                                             | Citation                                                                                                                                                                                                                                                                                                                                                                                                             | GHDx ID |
|--------------|-----------|-----------|--------------------------------------------------------------------|----------------------------------------------------------------------------------------------------------------------------------------------------------------------------------------------------------------------------------------------------------------------------------------------------------------------------------------------------------------------------------------------------------------------|---------|
| South Africa | 2010-2013 | SBH       | Excluded for multiple visits to same household                     | Fogarty International Center, National Institutes of Health (NIH), Foundation for the National Institutes of Health (FNIH), University of Venda. South Africa - Venda Malnutrition and Enteric Disease Study 2009-2014.                                                                                                                                                                                              | 261887  |
| South Africa | 2011      | SBH       | Reported 0 ced                                                     | Statistics South Africa. South Africa Population and Housing Census 2011.                                                                                                                                                                                                                                                                                                                                            | 12146   |
| South Africa | 2011      | CBH       | missing birth or death date exceeded 10% (Excluded in prior paper) | Southern Africa Labour and Development Research Unit. National Income Dynamics Study 2010-2011, Wave 2. Version 1.0. Cape Town: Southern Africa Labour and Development Research Unit [producer], 2012. Cape Town: DataFirst [distributor], 2013.                                                                                                                                                                     | 133731  |
| South Africa | 2011-2012 | SBH       | Excluded due to high number missing ced                            | Centers for Disease Control and Prevention (CDC), Global Clinical and Viral Laboratory (South Africa), Human Sciences Research Council, National Institute for Communicable Diseases (South Africa), South African Medical Research Council, University of Cape Town. South Africa National HIV Prevalence, Incidence, and Behavior Survey 2011-2012. Pretoria, South Africa: Human Sciences Research Council, 2016. | 313076  |
| South Africa | 2012      | SBH       | Survey series revisits households                                  | Southern Africa Labour and Development Research Unit. National Income Dynamics Study 2012, Wave 3 [dataset]. Version 1.2. Cape Town: Southern Africa Labour and Development Research Unit [producer], 2013. Cape Town: DataFirst [distributor], 2013                                                                                                                                                                 | 133732  |



| Country      | Year      | Data Type | Reason                                                    | Citation                                                                                                                                                                                                                                                                                                                                                    | GHDx ID |
|--------------|-----------|-----------|-----------------------------------------------------------|-------------------------------------------------------------------------------------------------------------------------------------------------------------------------------------------------------------------------------------------------------------------------------------------------------------------------------------------------------------|---------|
| South Africa | 2014-2015 | SBH       | Survey series revisits households                         | Southern Africa Labour and Development Research Unit. National Income Dynamics Study 2014 - 2015, Wave 4 [dataset]. Version 1.1. Cape Town: Southern Africa Labour and Development Research Unit [producer], 2016. Cape Town: DataFirst [distributor], 2016. Pretoria: Department of Planning Monitoring and Evaluation [commissioner], 2014                | 265153  |
| South Africa | 2017      | SBH       | Survey series revisits households                         | Southern Africa Labour and Development Research Unit. National Income Dynamics Study 2017, Wave 5 [dataset]. Version 1.0.0 Pretoria: Department of Planning, Monitoring, and Evaluation [funding agency]. Cape Town: Southern Africa Labour and Development Research Unit [implementer], 2018. Cape Town: DataFirst [distributor], 2018. 10.25828/fw3h-v708 | 369644  |
| South Sudan  | 2010      | CBH       | Cannot currently handle country splits within time series | Central Bureau of Statistics (Sudan), Federal Ministry of Health (Sudan), Government of Sudan, Ministry of Health (South Sudan), Southern Sudan Centre for Census, Statistics and Evaluation. Sudan - South Multiple Indicator Cluster Survey 2010. New York, United States: United Nations Children's Fund (UNICEF), 2015.                                 | 32189   |
| Tajikistan   | 2007      | SBH       | Need age of woman to use SBH                              | National State Statistical Agency (Tajikistan), World Bank. Tajikistan Living Standards Measurement Survey 2007.                                                                                                                                                                                                                                            | 12584   |
| Tanzania     | 2009      | SBH       | Only has SBH for <5                                       | Economic Development Initiatives (EDI). Tanzania Mainland Truck Roads and Zanzibar Rural Roads Activities Impact Evaluation 2009. High Wycombe, England: Economic Development Initiatives (EDI), 2010.                                                                                                                                                      | 32332   |

| Country     | Year      | Data Type | Reason                                                                                | Citation                                                                                                                                                                                                                                                                                                                                                    | GHDx ID |
|-------------|-----------|-----------|---------------------------------------------------------------------------------------|-------------------------------------------------------------------------------------------------------------------------------------------------------------------------------------------------------------------------------------------------------------------------------------------------------------------------------------------------------------|---------|
| Tanzania    | 2009-2014 | SBH       | Excluded for multiple visits to same household                                        | Fogarty International Center, National Institutes of Health (NIH), Foundation for the National Institutes of Health (FNIH), Haydom Lutheran Hospital. Tanzania - Haydom Malnutrition and Enteric Disease Study 2009-2014.                                                                                                                                   | 261889  |
| Timor-Leste | 2001      | SBH       | Unable to geomatch                                                                    | National Statistics Directorate (Timor-Leste), World Bank. Timor-Leste Living Standards and Measurement Survey 2001. Washington DC, United States: World Bank.                                                                                                                                                                                              | 12863   |
| Tunisia     | 2001      | CBH       | Excluded due to high number missing date of birth                                     | League of Arab States, National Office for Family and Population, Ministry of Public Health (Tunisia), Pan Arab Project for Family Health (PAPFAM). Tunisia Family Health Survey 2001.                                                                                                                                                                      | 12978   |
| Uganda      | 2010-2011 | SBH       | Panel Survey - Not representative                                                     | Uganda Bureau of Statistics. Uganda Living Standards Measurement Survey - Integrated Survey on Agriculture 2011-2012. Washington DC, United States: World Bank.                                                                                                                                                                                             | 142935  |
| Uganda      | 2015      | SBH       | Excluded pma2020 for inflated mortality and high missingness in reported child deaths | Makerere University, School of Public Health at the College of Health Sciences and The Bill & Melinda Gates Institute for Population and Reproductive Health at The Johns Hopkins Bloomberg School of Public Health. Performance Monitoring and Accountability 2020 (PMA2020) Survey round 3, PMA2015/Uganda-R3. 2015. Uganda and Baltimore, Maryland, USA. | 256201  |
| Uganda      | 2016      | SBH       | Excluded pma2020 for inflated mortality and high missingness in reported child deaths | Makerere University, School of Public Health at the College of Health Sciences and The Bill & Melinda Gates Institute for Population and Reproductive Health at The Johns Hopkins Bloomberg School of Public Health. Performance Monitoring and Accountability 2020 (PMA2020) Survey round 4, PMA2016/Uganda-R4. 2016. Uganda and Baltimore, Maryland, USA. | 285893  |

| Country | Year | Data Type | Reason                                                                                | Citation                                                                                                                                                                                                                                                                                                                                                    | GHDx ID |
|---------|------|-----------|---------------------------------------------------------------------------------------|-------------------------------------------------------------------------------------------------------------------------------------------------------------------------------------------------------------------------------------------------------------------------------------------------------------------------------------------------------------|---------|
| Uganda  | 2017 | SBH       | Excluded pma2020 for inflated mortality and high missingness in reported child deaths | Makerere University, School of Public Health at the College of Health Sciences and The Bill & Melinda Gates Institute for Population and Reproductive Health at The Johns Hopkins Bloomberg School of Public Health. Performance Monitoring and Accountability 2020 (PMA2020) Survey round 5, PMA2017/Uganda-R5. 2017. Uganda and Baltimore, Maryland, USA. | 347043  |
| Zambia  | 2008 | CBH       | Only has CBH for <5                                                                   | Central Statistical Office (Zambia). Zambia Global Fund Household Health Coverage Survey 2008. Lusaka, Zambia: Central Statistical Office (Zambia).                                                                                                                                                                                                         | 26702   |

1297
