# Supplementary material for: Mapping 123 million neonatal, infant and child deaths between 2000 and 2017
Source: Nature. 2019 Oct 16;574(7778):353–8. doi: 10.1038/s41586-019-1545-0 (PMC6800389; doi:10.1038/s41586-019-1545-0)
Supplement: Supplementary file 3 — A full list of LBD Under-5 Mortality Collaborators and their affiliations. [file 41586_2019_1545_MOESM3_ESM.pdf]

## **LBD Under-5 Mortality Collaborators:**

Roy Burstein\*, Nathaniel J. Henry\*, Michael L. Collison, Laurie B. Marczak, Amber Sligar, Stefanie Watson, Neal Marquez, Mahdieh Abbasalizad-Farhangi, Masoumeh Abbasi, Foad Abd-Allah, Amir Abdoli, Mohammad Abdollahi, Ibrahim Abdollahpour, Rizwan Suliankatchi Abdulkader, Michael R. M. Abrigo, Dilaram Acharya, Oladimeji M. Adebayo, Victor Adekanmbi, Davoud Adham, Mahdi Afshari, Mohammad Aghaali, Keivan Ahmadi, Mehdi Ahmadi, Ehsan Ahmadpour, Rushdia Ahmed, Chalachew Genet Akal, Joshua O. Akinyemi, Fares Alahdab, Noore Alam, Genet Melak Alamene, Kefyalew Addis Alene, Mehran Alijanzadeh, Cyrus Alinia, Vahid Alipour, Syed Mohamed Aljunid, Mohammed J. Almalki, Hesham M. Al-Mekhlafi, Khalid Altirkawi, Nelson Alvis-Guzman, Adeladza Kofi Amegah, Saeed Amini, Arianna Maeve Loreche Amit, Zohreh Anbari, Sofia Androudi, Mina Anjomshoa, Fereshteh Ansari, Carl Abelardo T. Antonio, Jalal Arabloo, Zohreh Arefi, Olatunde Aremu, Bahram Armoon, Amit Arora, Al Artaman, Anvar Asadi, Mehran Asadi-Aliabadi, Amir Ashraf-Ganjouei, Reza Assadi, Bahar Ataeinia, Sachin R. Atre, Beatriz Paulina Ayala Quintanilla, Martin Amogre Ayanore, Samad Azari, Ebrahim Babaei, Arefeh Babazadeh, Alaa Badawi, Soghra Bagheri, Mojtaba Bagherzadeh, Nafiseh Baheiraei, Abbas Balouchi, Aleksandra Barac, Quique Bassat, Bernhard T. Baune, Mohsen Bayati, Neeraj Bedi, Ettore Beghi, Masoud Behzadifar, Meysam Behzadifar, Yared Belete Belay, Brent Bell, Michelle L. Bell, Dessalegn Ajema Berbada, Robert S. Bernstein, Natalia V. Bhattacharjee, Suraj Bhattarai, Zulfiqar A. Bhutta, Ali Bijani, Somayeh Bohlouli, Nicholas J. K. Breitborde, Gabrielle Britton, Annie J. Browne, Sharath Burugina Nagaraja, Reinhard Busse, Zahid A. Butt, Josip Car, Rosario Cárdenas, Carlos A. Castañeda-Orjuela, Ester Cerin, Wagaye Fentahun Chanie, Pranab Chatterjee, Dinh-Toi Chu, Cyrus Cooper, Vera M. Costa, Koustuv Dalal, Lalit Dandona, Rakhi Dandona, Farah Daoud, Ahmad Daryani, Rajat Das Gupta, Ian Davis, Nicole Davis Weaver, Dragos Virgil Davitoiu, Jan-Walter De Neve, Feleke Mekonnen Demeke, Gebre Teklemariam Demoz, Kebede Deribe, Rupak Desai, Aniruddha Deshpande, Hanna Demelash Desyibelew, Sagnik Dey, Samath Dhamminda Dharmaratne, Meghnath Dhimal, Daniel Diaz, Leila Doshmangir, Andre R. Duraes, Laura Dwyer-Lindgren, Lucas Earl, Roya Ebrahimi, Soheil Ebrahimpour, Andem Effiong, Aziz Eftekhari, Elham Ehsani-Chimeh, Iman El Sayed, Maysaa El Sayed Zaki, Maha El Tantawi, Ziad El-Khatib, Mohammad Hassan Emamian, Shymaa Enany, Sharareh Eskandarieh, Oghenowede Eyawo, Maha Ezalarab, Mahbobeh Faramarzi, Mohammad Fareed, Roghiyeh Faridnia, Andre Faro, Ali Akbar Fazaeli, Mehdi Fazlzadeh, Netsanet Fentahun, Seyed-Mohammad Fereshtehnejad, João C. Fernandes, Irina Filip, Florian Fischer, Nataliya A. Foigt, Masoud Foroutan, Joel Msafiri Francis, Takeshi Fukumoto, Nancy Fullman, Silvano Gallus, Destallem Gebremedhin Gebre, Tsegaye Tewelde Gebrehiwot, Gebreamlak Gebremedhn Gebremeskel, Bradford D. Gessner, Birhanu Geta, Peter W. Gething, Reza Ghadimi, Keyghobad Ghadiri, Mahsa Ghajarzadeh, Ahmad Ghashghaee, Paramjit Singh Gill, Tiffany K. Gill, Nick Golding, Nelson G. M. Gomes, Philimon N. Gona, Sameer Vali Gopalani, Giuseppe Gorini, Bárbara Niegia Garcia Goulart, Nicholas Graetz, Felix Greaves, Manfred S. Green, Yuming Guo, Arvin Haj-Mirzaian, Arya Haj-Mirzaian, Brian James Hall, Samer Hamidi, Hamidreza Haririan, Josep Maria Haro, Milad Hasankhani, Edris Hasanpoor, Amir Hasanzadeh, Hadi Hassankhani, Hamid Yimam Hassen, Mohamed I. Hegazy, Delia Hendrie, Fatemeh Heydarpour, Thomas R. Hird, Chi Linh Hoang, Gillian Hollerich, Enayatollah Homaie Rad, Mojtaba Hoseini-Ghahfarokhi, Naznin Hossain, Mostafa Hosseini, Mehdi Hosseinzadeh, Mihaela Hostiuc, Sorin Hostiuc, Mowafa Househ, Mohamed Hsairi, Olayinka Stephen Ilesanmi, Mohammad Hasan Imani-Nasab, Usman Iqbal, Seyed Sina Naghibi Irvani, Nazrul Islam, Sheikh Mohammed Shariful Islam, Mikk Jürisson, Nader Jafari Balalami, Amir Jalali, Javad Javidnia, Achala Upendra Jayatilleke, Ensiyeh Jenabi, John S. Ji, Yash B. Jobanputra, Kimberly Johnson, Jost B. Jonas, Zahra Jorjoran Shushtari, Jacek Jerzy Jozwiak, Ali Kabir, Amaha Kahsay, Hamed Kalani, Rohollah

Kalhor, Manoochehr Karami, Surendra Karki, Amir Kasaeian, Nicholas J. Kassebaum, Peter Njenga Keiyoro, Grant Rodgers Kemp, Roghayeh Khabiri, Yousef Saleh Khader, Morteza Abdullatif Khafaie, Ejaz Ahmad Khan, Junaid Khan, Muhammad Shahzeb Khan, Young-Ho Khang, Khaled Khatib, Amir Khater, Mona M. Khater, Alireza Khatony, Mohammad Khazaei, Salman Khazaei, Maryam Khazaei-Pool, Jagdish Khubchandani, Neda Kianipour, Yun Jin Kim, Ruth W. Kimokoti, Damaris K. Kinyoki, Adnan Kisa, Sezer Kisa, Tufa Kolola, Soewarta Kosen, Parvaiz A. Koul, Ai Koyanagi, Moritz U. G. Kraemer, Kewal Krishan, Kris J. Krohn, Nuworza Kugbey, G Anil Kumar, Manasi Kumar, Pushpendra Kumar, Desmond Kuupiel, Ben Lacey, Sheetal D. Lad, Faris Hasan Lami, Anders O. Larsson, Paul H. Lee, Mostafa Leili, Aubrey J. Levine, Shanshan Li, Lee-Ling Lim, Stefan Listl, Joshua Longbottom, Jaifred Christian F. Lopez, Stefan Lorkowski, Sameh Magdeldin, Hassan Magdy Abd El Razek, Muhammed Magdy Abd El Razek, Azeem Majeed, Afshin Maleki, Reza Malekzadeh, Deborah Carvalho Malta, Abdullah A. Mamun, Navid Manafi, Ana-Laura Manda, Morteza Mansourian, Francisco Rogerlândio Martins-Melo, Anthony Masaka, Benjamin Ballard Massenburg, Pallab K. Maulik, Benjamin K. Mayala, Mohsen Mazidi, Martin McKee, Ravi Mehrotra, Kala M. Mehta, Gebrekiros Gebremichael Meles, Walter Mendoza, Ritesh G. Menezes, Atte Meretoja, Tuomo J. Meretoja, Tomislav Mestrovic, Ted R. Miller, Molly K. Miller-Petrie, Edward J. Mills, George J. Milne, GK Mini, Seyed Mostafa Mir, Hamed Mirjalali, Erkin M. Mirrakhimov, Efati Mohamadi, Dara K. Mohammad, Aso Mohammad Darwesh, Naser Mohammad Gholi Mezerji, Ammas Siraj Mohammed, Shafiu Mohammed, Ali H. Mokdad, Mariam Molokhia, Lorenzo Monasta, Yoshan Moodley, Mahmood Moosazadeh, Ghobad Moradi, Masoud Moradi, Yousef Moradi, Maziar Moradi-Lakeh, Mehdi Moradinazar, Paula Moraga, Lidia Morawska, Abbas Mosapour, Seyyed Meysam Mousavi, Ulrich Otto Mueller, Atalay Goshu Muluneh, Ghulam Mustafa, Behnam Nabavizadeh, Mehdi Naderi, Ahamarshan Jayaraman Nagarajan, Azin Nahvijou, Farid Najafi, Vinay Nangia, Duduzile Edith Ndwandwe, Nahid Neamati, Ionut Negoii, Ruxandra Irina Negoii, Josephine W. Ngunjiri, Huong Lan Thi Nguyen, Long Hoang Nguyen, Son Hoang Nguyen, Katie R. Nielsen, Dina Nur Anggraini Ningrum, Yirga Legesse Nirayo, Molly R. Nixon, Chukwudi A. Nnaji, Marzieh Nojomi, Mehdi Noroozi, Shirin Nosratnejad, Jean Jacques Noubiap, Soraya Nouraei Motlagh, Richard Ofori-Asenso, Felix Akpojene Ogbo, Kelechi E. Oladimeji, Andrew T. Olagunju, Meysam Olfatifar, Solomon Olum, Bolajoko Olubukunola Olusanya, Mojisola Morenike Oluwasanu, Obinna E. Onwujekwe, Eyal Oren, Doris D. V. Ortega-Altamirano, Alberto Ortiz, Osayomwanbo Osarenotor, Frank B. Osei, Aaron E. Osgood-Zimmerman, Stanislav S. Otstavnov, Mayowa Ojo Owolabi, Mahesh P A, Abdol Sattar Pagheh, Smita Pakhale, Songhomitra Panda-Jonas, Animika Pandey, Eun-Kee Park, Hadi Parsian, Tahereh Pashaei, Sangram Kishor Patel, Veincent Christian Filipino Pepito, Alexandre Pereira, Samantha Perkins, Brandon V. Pickering, Thomas Pilgrim, Majid Pirestani, Bakhtiar Piroozii, Meghdad Pirsaeheb, Oleguer Plana-Ripoll, Hadi Pourjafar, Parul Puri, Mostafa Qorbani, Hedley Quintana, Mohammad Rabiee, Navid Rabiee, Amir Radfar, Alireza Rafiei, Fakher Rahim, Zohreh Rahimi, Vafa Rahimi-Movaghar, Shadi Rahimzadeh, Fatemeh Rajati, Sree Bhushan Raju, Azra Ramezankhani, Chhabi Lal Ranabhat, Davide Rasella, Vahid Rashedi, Lal Rawal, Robert C. Reiner, Andre M. N. Renzaho, Satar Rezaei, Aziz Rezapour, Seyed Mohammad Riahi, Ana Isabel Ribeiro, Leonardo Roeber, Elias Merdassa Roro, Max Roser, Gholamreza Roshandel, Daem Roshani, Ali Rostami, Enrico Rubagotti, Salvatore Rubino, Siamak Sabour, Nafis Sadat, Ehsan Sadeghi, Reza Saeedi, Yahya Safari, Roya Safari-Faramani, Mahdi Safdarian, Amirhossein Sahebkar, Mohammad Reza Salahshoor, Nasir Salam, Payman Salamati, Farkhonde Salehi, Saleh Salehi Zahabi, Yahya Salimi, Hamideh Salimzadeh, Joshua A. Salomon, Evanson Zondani Sambala, Abdallah M. Samy, Milena M. Santric Milicevic, Bruno Piassi Sao Jose, Sivan Yegnanarayana Iyer Saraswathy, Rodrigo Sarmiento-Suárez, Benn Sartorius, Brijesh Sathian, Sonia Saxena, Alyssa N. Sbarra, Lauren E. Schaeffer, David C. Schwebel, Sadaf G. Sepanlou,

Seyedmojtaba Seyedmousavi, Faramarz Shaahmadi, Masood Ali Shaikh, Mehran Shams-Beyranvand, Amir Shamshirian, Morteza Shamsizadeh, Kiomars Sharafi, Mehdi Sharif, Mahdi Sharif-Alhoseini, Hamid Sharifi, Jayendra Sharma, Rajesh Sharma, Aziz Sheikh, Chloe Shields, Mika Shigematsu, Rahman Shiri, Ivy Shiue, Kerem Shuval, Tariq J. Siddiqi, João Pedro Silva, Jasvinder A. Singh, Dharendra Narain Sinha, Malede Mequanent Sisay, Solomon Sisay, Karen Sliwa, David L. Smith, Ranjani Somayaji, Moslem Soofi, Joan B. Soriano, Chandrashekhar T. Sreeramareddy, Agus Sudaryanto, Mu'awiyyah Babale Sufiyan, Bryan L. Sykes, PN Sylaja, Rafael Tabarés-Seisdedos, Karen M. Tabb, Takahiro Tabuchi, Nuno Taveira, Mohamad-Hani Tamsah, Abdullah Sulieman Terkawi, Zemenu Tadesse Tessema, Kavumpurathu Raman Thankappan, Sathish Thirunavukkarasu, Quyen G. To, Marcos Roberto Tovani-Palone, Bach Xuan Tran, Khanh Bao Tran, Irfan Ullah, Muhammad Shariq Usman, Olalekan A. Uthman, Amir Vahedian-Azimi, Pascual R. Valdez, Job F. M. van Boven, Tommi Juhani Vasankari, Yasser Vasseghian, Yousef Veisani, Narayanaswamy Venketasubramanian, Francesco S. Violante, Sergey Konstantinovitch Vladimirov, Vasily Vlassov, Theo Vos, Giang Thu Vu, Isidora S. Vujcic, Yasir Waheed, Jon Wakefield, Haidong Wang, Yafeng Wang, Yuan-Pang Wang, Joseph L. Ward, Robert G. Weintraub, Kidu Gidey Weldegewergs, Girmay Teklay Weldesamuel, Ronny Westerman, Charles Shey Wiysonge, Dawit Dawit Zewdu Wondafrash, Lauren Woyczynski, Ai-Min Wu, Gelin Xu, Abbas Yadegar, Tomohide Yamada, Vahid Yazdi-Feyzabadi, Christopher Sabo Yilgwan, Paul Yip, Naohiro Yonemoto, Javad Yoosefi Lebni, Mustafa Z. Younis, Mahmoud Yousefifard, Hebat-Allah Salah A. Yousof, Chuanhua Yu, Hasan Yusefzadeh, Erfan Zabehe, Telma Zahirian Moghadam, Sojib Bin Zaman, Mohammad Zamani, Hamed Zandian, Alireza Zangeneh, Taddese Alemu Zerfu, Yunquan Zhang, Arash Ziapour, Sanjay Zodpey, Christopher J. L. Murray<sup>§</sup> & Simon I. Hay<sup>§†</sup>.

\*These authors contributed equally

§These authors jointly supervised the work

†Corresponding author

*Institute for Health Metrics and Evaluation, University of Washington, Seattle, WA, USA*

Roy Burstein, Nathaniel J. Henry, Michael L. Collison, Laurie B. Marczak, Amber Sligar, Stefanie Watson, Neal Marquez, Brent Bell, Natalia V. Bhattacharjee, Lalit Dandona, Rakhi Dandona, Farah Daoud, Ian Davis, Nicole Davis Weaver, Aniruddha Deshpande, Samath D. Dharmaratne, Laura Dwyer-Lindgren, Lucas Earl, Maha Ezalarab, Nancy Fullman, Nicholas Graetz, Gillian Hollerich, Kimberly Johnson, Nicholas J. Kassebaum, Grant R. Kemp, Damaris K. Kinyoki, Kris J. Krohn, Aubrey J. Levine, Benjamin K. Mayala, Molly K. Miller-Petrie, Ali H. Mokdad, Molly R. Nixon, Aaron E. Osgood-Zimmerman, Samantha Perkins, Brandon V. Pickering, Robert C. Reiner, Nafis Sadat, Alyssa N. Sbarra, Lauren E. Schaeffer, Chloe Shields, David L. Smith, Theo Vos, Haidong Wang, Lauren Woyczynski, Christopher J. L. Murray & Simon I. Hay

*Department of Health Metrics Sciences, School of Medicine, University of Washington, Seattle, WA, USA*

Laura Dwyer-Lindgren, Damaris K. Kinyoki, Ali H. Mokdad, Robert C. Reiner, Benn Sartorius, David L. Smith, Theo Vos, Haidong Wang, Christopher J. L. Murray & Simon I. Hay

*Department of Anesthesiology & Pain Medicine, University of Washington, Seattle, WA, USA*

Nicholas J. Kassebaum

*Division of Plastic Surgery, University of Washington, Seattle, WA, USA*

Benjamin B. Massenburg

*Global Health Department, University of Washington, Seattle, WA, USA*

Katie R. Nielsen

*Department of Medicine, University of Washington, Seattle, WA, USA*

Ranjani Somayaji

*Department of Statistics, University of Washington, Seattle, WA, USA*

Jon Wakefield

*Department of Pediatrics, University of Washington, Seattle, WA, USA*

Katie R. Nielsen

*University of Washington, Seattle, WA, USA*

Eyal Oren

*Department of Nutrition, Tabriz University of Medical Sciences, Tabriz, Iran*

Mahdieh Abbasalizad-Farhangi

*Department of Parasitology and Mycology, Tabriz University of Medical Sciences, Tabriz, Iran*

Ehsan Ahmadpour

*Research Center for Evidence Based Medicine-Health Management and Safety Promotion Research Institute, Tabriz University of Medical Sciences, Tabriz, Iran*

Fereshteh Ansari

*Department of Health Policy and Economy, Tabriz University of Medical Sciences, Tabriz, Iran*  
Leila Doshmangir

*Department of Toxicology and Pharmacology, Tabriz University of Medical Sciences, Tabriz, Iran*  
Aziz Eftekhari

*School of Nutrition and Food Sciences, Tabriz University of Medical Sciences, Tabriz, Iran*  
Milad Hasankhani

*School of Nursing and Midwifery Tabriz University of Medical Sciences, Tabriz, Iran*  
Hadi Hassankhani

*Tabriz Health Management Research Center, Tabriz University of Medical Sciences, Tabriz, Iran*  
Roghayeh Khabiri

*Department of Health Economics, Tabriz University of Medical Sciences, Tabriz, Iran*  
Shirin Nosratnejad

*Tabriz University of Medical Sciences, Tabriz, Iran*  
Hamidreza Haririan

*Research Center for Environmental Determinants of Health, Kermanshah University of Medical Sciences, Kermanshah, Iran*  
Anvar Asadi, Mehdi Moradinazar, Ehsan Sadeghi & Masoud Moradi

*Medical Biology Research Center, Kermanshah University of Medical Sciences, Kermanshah, Iran*  
Fatemeh Heydarpour

*Radiology and Nuclear Medicine Department, Kermanshah University of Medical Sciences, Kermanshah, Iran*  
Mojtaba Hoseini-Ghahfarokhi

*Psychiatric Department, Kermanshah University of Medical Sciences, Kermanshah, Iran*  
Amir Jalali

*Operating Room Department, Kermanshah University of Medical Sciences, Kermanshah, Iran*  
Mehdi Naderi

*Department of Epidemiology & Biostatistics, Kermanshah University of Medical Sciences, Kermanshah, Iran*  
Farid Najafi & Yahya Salimi

*Department of Clinical Biochemistry, Kermanshah University of Medical Sciences, Kermanshah, Iran*  
Zohreh Rahimi

*Department of Health Education & Promotion, Kermanshah University of Medical Sciences,  
Kermanshah, Iran*  
Fatemeh Rajati

*Environmental Determinants of Health Research Center, Kermanshah University of Medical Sciences,  
Kermanshah, Iran*  
Satar Rezaei

*Faculty of Public Health, Kermanshah University of Medical Sciences, Kermanshah, Iran*  
Roya Safari-Faramani

*Department of Anatomical Sciences, Kermanshah University of Medical Sciences, Kermanshah, Iran*  
Mohammad R. Salahshoor

*Taleghani Hospital, Kermanshah University of Medical Sciences, Kermanshah, Iran*  
Farkhonde Salehi

*Department of Radiology and Nuclear Medicine, Kermanshah University of Medical Sciences,  
Kermanshah, Iran*  
Saleh Salehi Zahabi

*Social Development and Health Promotion Research Center, Kermanshah University of Medical  
Sciences, Kermanshah, Iran*  
Moslem Soofi

*Research Center for Environmental Determinants of Health (RCEDH), Kermanshah University of  
Medical Sciences, Kermanshah, Iran*  
Yasser Vasseghian

*Social Development and Health Promotion Research Center, Kermanshah University of Medical  
Sciences, Kermanshah, Iran*  
Alireza Zangeneh

*School of Public Health, Kermanshah University of Medical Sciences, Kermanshah, Iran*  
Neda Kianipour

*Kermanshah University of Medical Sciences, Kermanshah, Iran*  
Masoumeh Abbasi, Soghra Bagheri, Keyghobad Ghadiri, Alireza Khatony, Neda Kianipour, Masoud  
Moradi, Meghdad Pirsaeheb, Yahya Safari & Kiomars Sharafi

*Department of Neurology, Cairo University, Cairo, Egypt*  
Foad Abd-Allah & Mohamed I. Hegazy

*Department of Medical Parasitology, Cairo University, Cairo, Egypt*  
Mona M. Khater

*Medical Parasitology Department, Cairo University, Cairo, Egypt*  
Hebat-Allah S. A. Yousof

*Department of Parasitology and Mycology, Jahrom University of Medical Sciences, Jahrom, Iran*  
Amir Abdoli

*The Institute of Pharmaceutical Sciences, Tehran University of Medical Sciences, Tehran, Iran*  
Mohammad Abdollahi

*Department of Health Promotion and Education, Tehran University of Medical Sciences, Tehran, Iran*  
Zohreh Arefi

*Faculty of Medicine, Tehran University of Medical Sciences, Tehran, Iran*  
Amir Ashraf-Ganjouei

*Non-communicable Diseases Research Center, Tehran University of Medical Sciences, Tehran, Iran*  
Bahar Ataeinia, Shadi Rahimzadeh & Mehran Shams-Beyranvand

*National Institute for Health Researchers, Tehran University of Medical Sciences, Tehran, Iran*  
Elham Ehsani-Chimeh

*Multiple Sclerosis Research Center, Tehran University of Medical Sciences, Tehran, Iran*  
Amir Ashraf-Ganjouei, Ibrahim Abdollahpour & Sharareh Eskandarieh

*Environmental Health Engineering, Tehran University of Medical Sciences, Tehran, Iran*  
Mehdi Fazlzadeh

*Department of Neurology, Tehran University of Medical Sciences, Tehran, Iran*  
Mahsa Ghajarzadeh

*Department of Pharmacology, Tehran University of Medical Sciences, Tehran, Iran*  
Arvin Haj-Mirzaian & Arya Haj-Mirzaian

*Department of Microbiology, Tehran University of Medical Sciences, Tehran, Iran*  
Amir Hasanzadeh

*Department of Epidemiology and Biostatistics, Tehran University of Medical Sciences, Tehran, Iran*  
Mostafa Hosseini

*Hematologic Malignancies Research Center, Tehran University of Medical Sciences, Tehran, Iran*  
Amir Kasaeian

*National Institute for Health Research (NIHR), Tehran University of Medical Sciences, Tehran, Iran*  
Roghayeh Khabiri

*Digestive Diseases Research Institute, Tehran University of Medical Sciences, Tehran, Iran*  
Reza Malekzadeh, Gholamreza Roshandel, Hamideh Salimzadeh & Sadaf G. Sepanlou

*Health Equity Research Center, Tehran University of Medical Sciences, Tehran, Iran*  
Efat Mohamadi

*Department of Health Management and Economics, Tehran University of Medical Sciences, Tehran, Iran*  
Seyyed Meysam Mousavi

*Department of Urology, Tehran University of Medical Sciences, Tehran, Iran*  
Behnam Nabavizadeh

*Cancer Research Center of Cancer Institute, Tehran University of Medical Sciences, Tehran, Iran*  
Azin Nahvijou

*Endocrinology and Metabolism Molecular-Cellular Sciences Institute, Tehran University of Medical Sciences, Tehran, Iran*  
Fakher Rahim

*Sina Trauma and Surgery Research Center, Tehran University of Medical Sciences, Tehran, Iran*  
Vafa Rahimi-Movaghar, Mahdi Safdarian, Payman Salamati & Mahdi Sharif-Alhoseini

*Center of Expertise in Microbiology, Tehran University of Medical Sciences, Tehran, Iran*  
Seyedmojtaba Seyedmousavi

*Hematology-Oncology and Stem Cell Transplantation Research Center, Tehran University of Medical Sciences, Tehran, Iran*  
Amir Kasaeian

*Department of Epidemiology, Arak University of Medical Sciences, Arak, Iran*  
Ibrahim Abdollahpour

*Health Services Management Department, Arak University of Medical Sciences, Arak, Iran*  
Saeed Amini & Zohreh Anbari

*Department of Public Health, Ministry of Health, Riyadh, Saudi Arabia*  
Rizwan S. Abdulkader

*Policy and Planning Division, Ministry of Health, Riyadh, Saudi Arabia*  
Jayendra Sharma

*Research Department, Philippine Institute for Development Studies, Quezon City, The Philippines*  
Michael R.M. Abrigo

*Department of Preventive Medicine, Dongguk University, Gyeongju, South Korea*  
Dilaram Acharya

*Department of Community Medicine, Kathmandu University, Devdaha, Nepal*  
Dilaram Acharya

*College of Medicine, University College Hospital, Ibadan, Nigeria*  
Oladimeji M. Adebayo

*School of Medicine, Cardiff University, Cardiff, UK*  
Victor Adekanmbi

*School of Health, Ardabil University of Medical Science, Ardabil, Iran*  
Davoud Adham

*Department of Environmental Health Engineering, Ardabil University of Medical Science, Ardabil, Iran*  
Mehdi Fazlzadeh

*Social Determinants of Health Research Center, Ardabil University of Medical Science, Ardabil, Iran*  
Telma Zahirian Moghadam & Hamed Zandian

*Department of Community Medicine, Ardabil University of Medical Science, Ardabil, Iran*  
Hamed Zandian

*Department of Community Medicine, Zabol University of Medical Sciences, Zabol, Iran*  
Mahdi Afshari

*Department of Epidemiology and Biostatistics, Qom University of Medical Sciences, Qom, Iran*  
Mohammad Aghaali

*School of Pharmacy, University of Lincoln, Lincoln, UK*  
Keivan Ahmadi

*Environmental Technologies Research Center, Ahvaz Jundishapur University of Medical Sciences, Ahvaz, Iran*  
Mehdi Ahmadi

*Social Determinants of Health Research Center, Ahvaz Jundishapur University of Medical Sciences, Ahvaz, Iran*  
Morteza A. Khafaie

*Thalassemia and Hemoglobinopathy Research Center, Ahvaz Jundishapur University of Medical Sciences, Ahvaz, Iran*  
Fakher Rahim

*James P Grant School of Public Health, Brac University, Dhaka, Bangladesh*  
Rushdia Ahmed & Rajat Das Gupta

*Health Systems and Population Studies Division, International Centre for Diarrhoeal Disease Research,  
Bangladesh, Dhaka, Bangladesh*  
Rushdia Ahmed & Naznin Hossain

*Maternal and Child Health Division, International Centre for Diarrhoeal Disease Research,  
Bangladesh, Dhaka, Bangladesh*  
Sojib bin Zaman

*Department of Medical Laboratory Science, Bahir Dar University, Bahir Dar, Ethiopia*  
Chalachew G. Akal

*Public Health Nutrition, Bahir Dar University, Bahir Dar, Ethiopia*  
Hanna D. Desyibelew

*Department of Public Health Nutrition, Bahir Dar University, Bahir Dar, Ethiopia*  
Netsanet Fentahun

*Bahir Dar University, Bahir Dar, Ethiopia*  
Feleke M. Demeke

*Epidemiology and Medical Statistics, University of Ibadan, Ibadan, Nigeria*  
Joshua O. Akinyemi

*Department of Community Medicine, University of Ibadan, Ibadan, Nigeria*  
Olayinka S. Ilesanmi

*Department of Health Promotion and Education, University of Ibadan, Ibadan, Nigeria*  
Mojisola M. Oluwasanu

*Institute for Advanced Medical Research and Training, University of Ibadan, Ibadan, Nigeria*  
Mayowa O. Owolabi

*Evidence Based Practice Center, Mayo Clinic Foundation for Medical Education and Research,  
Rochester, MN, USA*  
Fares Alahdab

*Prevention Division, Queensland Health, Herston, QLD, Australia*  
Noore Alam

*School of Health Sciences, Madda Walabu University, Bale Goba, Ethiopia*  
Genet Melak Alamene

*Institute of Public Health, University of Gondar, Gondar, Ethiopia*  
Kefyalew A. Alene

*Department of Obstetrics and Gynaecology, University of Gondar, Gondar, Ethiopia*  
Wagaye F. Chanie

*Department of Epidemiology and Biostatistics, University of Gondar, Gondar, Ethiopia*  
Zemenu T. Tessema, Malede M. Sisay & Atalay G. Muluneh

*Research School of Population Health, Australian National University, Canberra, ACT, Australia*  
Kefyalew A. Alene

*Social Determinants of Health Research Center, Qazvin University of Medical Sciences, Qazvin, Iran*  
Rohollah Kalhor

*Qazvin University of Medical Sciences, Qazvin, Iran*  
Mehran Alijanzadeh

*Department of Health Care Management and Economics, Urmia University of Medical Science, Urmia, Iran*  
Cyrus Alinia

*Health Economics Department, Iran University of Medical Sciences, Tehran, Iran*  
Vahid Alipour

*Health Management and Economics Research Center, Iran University of Medical Sciences, Tehran, Iran*  
Jalal Arabloo, Samad Azari, Mehdi Hosseinzadeh, Aziz Rezapour, Telma Zahirian Moghadam & Vahid Alipour

*Preventive Medicine and Public Health Research Center, Iran University of Medical Sciences, Tehran, Iran*  
Mehran Asadi-Aliabadi, Ebrahim Babaee, Maziar Moradi-Lakeh & Marzieh Nojomi

*School of Nursing and Midwifery, Iran University of Medical Sciences, Tehran, Iran*  
Abbas Balouchi

*Department of Health Services Management, Iran University of Medical Sciences, Tehran, Iran*  
Ahmad Ghashghaee

*Minimally Invasive Surgery Research Center, Iran University of Medical Sciences, Tehran, Iran*  
Ali Kabir

*Ophthalmology Department, Iran University of Medical Sciences, Tehran, Iran*  
Navid Manafi

*Department of Health Education and Health Promotion, Iran University of Medical Sciences, Tehran, Iran*  
Morteza Mansourian, Javad Yoosefi Lebni & Arash Ziapour

*Department of Epidemiology, Iran University of Medical Sciences, Tehran, Iran*  
Yousef Moradi

*Department of Community and Family Medicine, Iran University of Medical Sciences, Tehran, Iran*  
Marzieh Nojomi

*School of Behavioral Sciences and Mental Health, Iran University of Medical Sciences, Tehran, Iran*  
Vahid Rashedi

*Department of Neuroscience, Iran University of Medical Sciences, Tehran, Iran*  
Mahdi Safdarian

*Department of Health Policy and Management, Kuwait University, Safat, Kuwait*  
Syed M. Aljunid

*International Centre for Casemix and Clinical Coding, National University of Malaysia, Bandar Tun Razak, Malaysia*  
Syed M. Aljunid

*Medical Research Center, Jazan University, Jazan, Saudi Arabia*  
Hesham M. Al-Mekhlafi

*Faculty of Public Health and Tropical Medicine, Jazan University, Jazan, Saudi Arabia*  
Mohammed J. Almalki

*Jazan University, Jazan, Saudi Arabia*  
Mohammed J. Almalki & Neeraj Bedi

*Department of Medical Parasitology, Sana'a University, Sana'a, Yemen*  
Hesham M. Al-Mekhlafi

*Department of Pediatrics, King Saud University, Riyadh, Saudi Arabia*  
Mohamad-Hani Temsah

*King Saud University, Riyadh, Saudi Arabia*  
Khalid Altirkawi

*Research Group in Health Economics, Universidad de Cartagena, Cartagena, Colombia*  
Nelson Alvis-Guzman

*Research Group in Hospital Management and Health Policies, Universidad de la Costa, Barranquilla, Colombia*  
Nelson Alvis-Guzman

*Biomedical Science, University of Cape Coast, Cape Coast, Ghana*  
Adeladza K. Amegah

*Department of Epidemiology and Biostatistics, University of the Philippines Manila, Manila, The Philippines*

Arianna Mae L. Amit & Jaifred Christian F. Lopez

*Department of Health Policy and Administration, University of the Philippines Manila, Manila, The Philippines*

Carl Abelardo T. Antonio

*Online Programs for Applied Learning, Johns Hopkins University, Baltimore, Maryland, USA*

Arianna Mae L. Amit

*Center for Clinical Global Health Education, Johns Hopkins University, Baltimore, Maryland, USA*

Sachin R. Atre

*Department of Radiology, Johns Hopkins University, Baltimore, Maryland, USA*

Arya Haj-Mirzaian

*Department of Medicine, University of Thessaly, Volos, Greece*

Sofia Androudi

*Social Determinants of Health Research Center, Rafsanjan University of Medical Sciences, Rafsanjan, Iran*

Mina Anjomshoa

*Department of Applied Social Sciences, Hong Kong Polytechnic University, Hong Kong, China*

Carl Abelardo T. Antonio

*School of Nursing, Hong Kong Polytechnic University, Hong Kong, China*

Paul H. Lee

*School of Health Sciences, Birmingham City University, Birmingham, UK*

Olatunde Aremu

*School of Nursing and Midwifery, Saveh University of Medical Sciences, Saveh, Iran*

Bahram Armoon

*Social Determinants of Health Research Center, Saveh University of Medical Sciences, Saveh, Iran*

Bahram Armoon

*School of Science and Health, Western Sydney University, Penrith, NSW, Australia*

Amit Arora & Lal Rawal

*Translational Health Research Institute, Western Sydney University, Penrith, NSW, Australia*

Felix A. Ogbo

*School of Social Sciences and Psychology, Western Sydney University, Penrith, NSW, Australia*

Andre M.N. Renzaho

*Social Science and Psychology, Western Sydney University, Penrith, NSW, Australia*  
Lal Rawal

*Oral Health Services, Sydney Local Health District, Sydney, NSW, Australia*  
Amit Arora

*Department of Community Health Sciences, University of Manitoba, Winnipeg, MB, Canada*  
Al Artaman

*Department Ophthalmology, University of Manitoba, Winnipeg, MB, Canada*  
Navid Manafi

*Education Development Center, Mashhad University of Medical Sciences, Mashhad, Iran*  
Reza Assadi

*Neurogenic Inflammation Research Center, Mashhad University of Medical Sciences, Mashhad, Iran*  
Amirhossein Sahebkar

*Biotechnology Research Center, Mashhad University of Medical Sciences, Mashhad, Iran*  
Amirhossein Sahebkar

*Dr. D.Y. Patil Medical College, Pune, India*  
Sachin R. Atre

*The Judith Lumley Centre, La Trobe University, Melbourne, VIC, Australia*  
Beatriz Paulina Ayala Quintanilla

*General Office for Research and Technological Transfer, Peruvian National Institute of Health, Lima, Peru*  
Beatriz Paulina Ayala Quintanilla

*Department of Family and Community Health, University of Health and Allied Sciences, Ho, Ghana*  
Martin A. Ayanore

*Family and Community Health, University of Health and Allied Sciences, Ho, Ghana*  
Nuworza Kugbey

*Center for Infectious Diseases Research, Babol, Iran*  
Arefeh Babazadeh & Soheil Ebrahimpour

*Public Health Risk Sciences Division, Public Health Agency of Canada, Toronto, ON, Canada*  
Alaa Badawi

*Department of Nutritional Sciences, University of Toronto, Toronto, ON, Canada*  
Alaa Badawi

*The Centre for Global Child Health, Hospital for Sick Children, University of Toronto, Toronto, ON, Canada*

Zulfiqar A. Bhutta

*Department of Chemistry, Sharif University of Technology, Tehran, Iran*

Mojtaba Bagherzadeh & Navid Rabiee

*Department of Electrical Engineering, Sharif University of Technology, Tehran, Iran*

Erfan Zabeh

*Tissue Engineering and Applied Cell Sciences Division, Tarbiat Modares University, Tehran, Iran*

Nafiseh Baheiraei

*Department of Clinical Biochemistry, Tarbiat Modares University, Tehran, Iran*

Abbas Mosapour

*Parasitology and Entomology Department, Tarbiat Modares University, Tehran, Iran*

Majid Pirestani

*Division of Diseases, Advanced Technologies Research Group, Tehran, Iran*

Nafiseh Baheiraei

*Clinic for Infectious and Tropical Diseases, Clinical Center of Serbia, Belgrade, Serbia*

Aleksandra Barac

*Faculty of Medicine, University of Belgrade, Belgrade, Serbia*

Aleksandra Barac & Isidora S. Vujcic

*Centre School of Public Health and Health Management, University of Belgrade, Belgrade, Serbia*

Milena M. Santric Milicevic

*Barcelona Institute for Global Health, University of Barcelona, Barcelona, Spain*

Quique Bassat

*Catalan Institution for Research and Advanced Studies (ICREA), Barcelona, Spain*

Quique Bassat & Ai Koyanagi

*Department of Psychiatry, Melbourne Medical School, Melbourne, VIC, Australia*

Bernhard T. Baune

*Health Human Resources Research Center, Shiraz University of Medical Sciences, Shiraz, Iran*

Mohsen Bayati

*Non-communicable Diseases Research Center, Shiraz University of Medical Sciences, Shiraz, Iran*

Reza Malekzadeh & Sadaf G. Sepanlou

*Department of Community Medicine, Gandhi Medical College Bhopal, Bhopal, India*  
Neeraj Bedi

*Department of Neuroscience, Mario Negri Institute for Pharmacological Research, Milan, Italy*  
Ettore Beghi

*Department of Environmental Health Science, Mario Negri Institute for Pharmacological Research, Milan, Italy*  
Silvano Gallus

*Social Determinants of Health Research Center, Lorestan University of Medical Sciences, Khorramabad, Iran*  
Masoud Behzadifar

*Hepatitis Research Center, Lorestan University of Medical Sciences, Khorramabad, Iran*  
Meysam Behzadifar

*Department of Public Health, Lorestan University of Medical Sciences, Khorramabad, Iran*  
Mohammad Hasan Imani-Nasab & Soraya Nouraei Motlagh

*Pharmacoepidemiology and Social Pharmacy, Mekelle University, Mekelle, Ethiopia*  
Yared Belete Belay

*School of Nursing, Mekelle University, Mekelle, Ethiopia*  
Gebreamlak G. Gebremeskel

*Department of Nutrition and Dietetics, Mekelle University, Mekelle, Ethiopia*  
Amaha Kahsay

*Clinical Pharmacy Unit, Mekelle University, Mekelle, Ethiopia*  
Yirga L. Nirayo & Kidu G. Weldegewergs

*Department of Pharmacology and Toxicology, Mekelle University, Mekelle, Ethiopia*  
Dawit D.Z. Wondafrash

*Mekelle University, Mekelle, Ethiopia*  
Destallem G. Gebre

*School of Forestry and Environmental Studies, Yale University, New Haven, CT, USA*  
Michelle L. Bell

*Department of Public Health, Arba Minch University, Arba Minch, Ethiopia*  
Dessaegn A. Berbada & Gebrekiros G. Meles

*Hubert Department of Global Health, Emory University, Atlanta, GA, USA*  
Robert S. Bernstein

*Department of Global Health, University of South Florida, Tampa, FL, USA*  
Robert S. Bernstein

*Department of Health Services Research and Policy, London School of Hygiene & Tropical Medicine, London, UK*  
Martin McKee

*Faculty of Infectious and Tropical Diseases, London School of Hygiene & Tropical Medicine, London, UK*  
Benn Sartorius

*London School of Hygiene & Tropical Medicine, London, UK*  
Suraj Bhattarai

*Nepal Academy of Science & Technology, Patan, Nepal*  
Suraj Bhattarai

*Center of Excellence in Women and Child Health, Aga Khan University, Karachi, Pakistan*  
Zulfiqar A. Bhutta

*Social Determinants of Health Research Center, Babol University of Medical Sciences, Babol, Iran*  
Ali Bijani

*Health Research Institute, Babol University of Medical Sciences, Babol, Iran*  
Reza Ghadimi

*Department of Clinical Biochemistry, Babol University of Medical Sciences, Babol, Iran*  
Seyed Mostafa Mir, Abbas Mosapour, Nahid Neamati & Hadi Parsian

*Infectious Diseases and Tropical Medicine Research Center, Babol University of Medical Sciences, Babol, Iran*  
Ali Rostami

*Student Research Committee, Babol University of Medical Sciences, Babol, Iran*  
Mohammad Zamani

*Babol University of Medical Sciences, Babol, Iran*  
Mahbobeh Faramarzi

*Department of Veterinary Medicine, Karaj Islamic Azad University, Kermanshah, Iran*  
Somayeh Bohlouli

*Department of Laboratory Sciences, Karaj Islamic Azad University, Kermanshah, Iran*  
Mehdi Sharif

*Department of Basic Sciences, Karaj Islamic Azad University, Kermanshah, Iran*  
Mehdi Sharif

*Department of Psychology, Ohio State University, Columbus, OH, USA*  
Nicholas J.K. Breitborde

*Psychiatry and Behavioral Health Department, Ohio State University, Columbus, OH, USA*  
Nicholas J.K. Breitborde

*Neuroscience Department, Institute for Scientific Research and High Technology Services, City of Knowledge, Panama*  
Gabrielle Britton

*Gorgas Memorial Institute for Health Studies, Panama, Panama*  
Gabrielle Britton & Hedley Quintana

*Big Data Institute, Li Ka Shing Centre for Health Information and Discovery, University of Oxford, Oxford, UK*  
Annie J. Browne & Peter W. Gething

*Department of Rheumatology, University of Oxford, Oxford, UK*  
Cyrus Cooper

*Department of Zoology, University of Oxford, Oxford, UK*  
Moritz U.G. Kraemer

*Nuffield Department of Population Health, University of Oxford, Oxford, UK*  
Ben Lacey

*Martin School, University of Oxford, Oxford, UK*  
Max Roser

*Department of Community Medicine, Employees' State Insurance Model Hospital, Bangalore, India*  
Sharath Burugina Nagaraja

*Department for Health Care Management, Technical University of Berlin, Berlin, Germany*  
Reinhard Busse

*School of Population and Public Health, University of British Columbia, Vancouver, BC, Canada*  
Zahid A. Butt

*Al Shifa School of Public Health, Al Shifa Trust Eye Hospital, Rawalpindi, Pakistan*  
Zahid A. Butt

*Centre for Population Health Sciences, Nanyang Technological University, Singapore, Singapore*  
Josip Car

*Nanyang Technological University, Singapore, Singapore*  
Sathish Thirunavukkarasu

*Global Ehealth Unit, Imperial College London, London, UK*  
Josip Car

*Department of Primary Care and Public Health, Imperial College London, London, UK*  
Felix Greaves & Azeem Majeed

*School of Public Health, Imperial College London, London, UK*  
Sonia Saxena

*Department of Population and Health, Metropolitan Autonomous University, Mexico City, Mexico*  
Rosario Cárdenas

*Colombian National Health Observatory, National Institute of Health, Bogota, Colombia*  
Carlos A. Castañeda-Orjuela

*Epidemiology and Public Health Evaluation Group, National University of Colombia, Bogota, Colombia*  
Carlos A. Castañeda-Orjuela

*Mary Mackillop Institute for Health Research, Australian Catholic University, Melbourne, VIC, Australia*  
Ester Cerin

*School of Public Health, University of Hong Kong, Hong Kong, China*  
Ester Cerin

*Centre for Suicide Research and Prevention, University of Hong Kong, Hong Kong, China*  
Paul Yip

*Department of Social Work and Social Administration, University of Hong Kong, Hong Kong, China*  
Paul Yip

*Division of Epidemiology, National Institute of Cholera and Enteric Diseases, Kolkata, India*  
Pranab Chatterjee

*Faculty of Biology, Hanoi National University of Education, Hanoi, Vietnam*  
Dinh-Toi Chu

*Medical Research Council Lifecourse Epidemiology Unit, University of Southampton, Southampton, UK*  
Cyrus Cooper

*Applied Molecular Biosciences Unit (UCIBIO), University of Porto, Porto, Portugal*  
Vera M. Costa & João P. Silva

*Department of Chemistry, University of Porto, Porto, Portugal*  
Nelson G.M. Gomes

*EPIUnit, University of Porto, Porto, Portugal*  
Ana Isabel Ribeiro

*Institute of Public Health Kalyani, Kalyani, India*  
Koustuv Dalal

*School of Health Science, Orebro University, Orebro, Sweden*  
Koustuv Dalal

*Indian Institute of Public Health, Public Health Foundation of India, Gurugram, India*  
Sanjay Zodpey

*Public Health Foundation of India, Gurugram, India*  
Lalit Dandona, Rakhi Dandona, G Anil Kumar & Animika Pandey

*Toxoplasmosis Research Center, Mazandaran University of Medical Sciences, Sari, Iran*  
Ahmad Daryani & Abdol Sattar Pagheh

*Department of Parasitology, Mazandaran University of Medical Sciences, Sari, Iran*  
Roghiyeh Faridnia

*Department of Medical Mycology, Mazandaran University of Medical Sciences, Sari, Iran*  
Javad Javidnia

*Department of Public Health, Mazandaran University of Medical Sciences, Sari, Iran*  
Maryam Khazaei-Pool

*Health Sciences Research Center, Mazandaran University of Medical Sciences, Sari, Iran*  
Mahmood Moosazadeh

*Molecular and Cell Biology Research Center, Mazandaran University of Medical Sciences, Sari, Iran*  
Alireza Rafiei

*Invasive Fungi Research Center, Mazandaran University of Medical Sciences, Sari, Iran*  
Seyedmojtaba Seyedmousavi

*Medical Laboratory Sciences, Mazandaran University of Medical Sciences, Sari, Iran*  
Amir Shamshirian

*Department of Immunology, Mazandaran University of Medical Sciences, Sari, Iran*  
Alireza Rafiei

*Mazandaran University of Medical Sciences, Sari, Iran*  
Hamed Kalani

*Department of General Surgery, Carol Davila University of Medicine and Pharmacy, Bucharest, Romania*

Dragos V. Davitoiu & Mihaela Hostiuc

*Faculty of Dentistry, Carol Davila University of Medicine and Pharmacy, Bucharest, Romania*

Sorin Hostiuc

*Emergency Hospital of Bucharest, Carol Davila University of Medicine and Pharmacy, Bucharest, Romania*

Ionut Negoii

*Anatomy and Embryology Department, Carol Davila University of Medicine and Pharmacy, Bucharest, Romania*

Ruxandra I. Negoii

*General Surgery Department, Carol Davila University of Medicine and Pharmacy, Bucharest, Romania*

Ionut Negoii

*Department of Surgery, Clinical Emergency Hospital Sf. Pantelimon, Bucharest, Romania*

Dragos V. Davitoiu

*Heidelberg Institute of Global Health (HIGH), Heidelberg University, Heidelberg, Germany*

Jan-Walter de Neve

*Department of Ophthalmology, Heidelberg University, Heidelberg, Germany*

Jost B. Jonas

*Institute of Public Health, Heidelberg University, Heidelberg, Germany*

Shafiu Mohammed

*Heidelberg University, Heidelberg, Germany*

Songhomitra Panda-Jonas

*School of Pharmacy, Aksum University, Aksum, Ethiopia*

Gebre T. Demoz

*Nursing Department, Aksum University, Aksum, Ethiopia*

Gebreamlak G. Gebremeskel

*School of Nursing, Aksum University, Aksum, Ethiopia*

Girmay T. Weldesamuel

*School of Public Health, Addis Ababa University, Addis Ababa, Ethiopia*

Kebede Deribe

*Public Health, Addis Ababa University, Addis Ababa, Ethiopia*

Elias E.M. Roro

*Department of Pharmacology, Addis Ababa University, Addis Ababa, Ethiopia*

Dawit D.Z. Wondafrash

*Addis Ababa University, Addis Ababa, Ethiopia*

Gebre T. Demoz

*Department of Global Health and Infection, Brighton and Sussex Medical School, Brighton, UK*

Kebede Deribe

*Division of Cardiology, Atlanta Veterans Affairs Medical Center, Decatur, GA, USA*

Rupak Desai

*Centre for Atmospheric Sciences, Indian Institute of Technology Delhi, New Delhi, India*

Sagnik Dey

*Department of Community Medicine, University of Peradeniya, Peradeniya, Sri Lanka*

Samath D. Dharmaratne

*Health Research Section, Nepal Health Research Council, Kathmandu, Nepal*

Meghnath Dhimal

*Center of Complexity Sciences, National Autonomous University of Mexico, Mexico City, Mexico*

Daniel Diaz

*Facultad de Medicina Veterinaria y Zootecnia, Autonomous University of Sinaloa, Culiacan Rosales, Mexico*

Daniel Diaz

*School of Medicine, Federal University of Bahia, Salvador, Brazil*

Andre R. Duraes

*Institute of Public Health, Federal University of Bahia, Salvador, Brazil*

Davide Rasella

*Diretoria Médica, Roberto Santos General Hospital, Salvador, Brazil*

Andre R. Duraes

*Environmental Health Research Center, Kurdistan University of Medical Sciences, Sanandaj, Iran*

Roya Ebrahimi, Afshin Maleki & Tahereh Pashaei

*Department of Epidemiology and Biostatistics, Kurdistan University of Medical Sciences, Sanandaj, Iran*

Ghobad Moradi

*Social Determinants of Health Research Center, Kurdistan University of Medical Sciences, Sanandaj, Iran*

Bakhtiar Piroozi & Ghobad Moradi

*Epidemiology and Biostatistics, Kurdistan University of Medical Sciences, Sanandaj, Iran*

Daem Roshani

*Clinical Epidemiology and Biostatistics, University of Newcastle, Newcastle, NSW, Australia*

Andem Effiong

*Department of Basic Sciences, Maragheh University of Medical Sciences, Maragheh, Iran*

Aziz Eftekhari

*Healthcare Management, Maragheh University of Medical Sciences, Maragheh, Iran*

Edris Hasanpoor

*Department of Microbiology, Maragheh University of Medical Sciences, Maragheh, Iran*

Amir Hasanzadeh

*Department of Public Health, and Department of Nutrition and Food Sciences, Maragheh University of Medical Sciences, Maragheh, Iran*

Hadi Pourjafar

*Medical Research Institute, Alexandria University, Alexandria, Egypt*

Iman El Sayed

*Pediatric Dentistry and Dental Public Health, Alexandria University, Alexandria, Egypt*

Maha El Tantawi

*Department of Clinical Pathology, Mansoura University, Mansoura, Egypt*

Maysaa El Sayed Zaki

*Preventive Dental Sciences, Imam Abdulrahman Bin Faisal University, Dammam, Saudi Arabia*

Maha El Tantawi

*Forensic Medicine Division, Imam Abdulrahman Bin Faisal University, Dammam, Saudi Arabia*

Ritesh G. Menezes

*Department of Public Health Sciences, Karolinska Institutet, Stockholm, Sweden*

Ziad El-Khatib

*Department of Neurobiology, Karolinska Institutet, Stockholm, Sweden*

Seyed-Mohammad Fereshtehnejad

*Department of Medicine Huddinge, Karolinska Institutet, Stockholm, Sweden*

Dara K. Mohammad

*Ophthalmic Epidemiology Research Center, Shahroud University of Medical Sciences, Shahroud, Iran*  
Mohammad Hassan Emamian

*Department of Microbiology and Immunology, Suez Canal University, Ismailia, Egypt*  
Shymaa Enany

*Physiology Department, Suez Canal University, Ismailia, Egypt*  
Sameh Magdeldin

*Proteomics and Metabolomics Unit, Suez Canal University, Ismailia, Egypt*  
Sameh Magdeldin

*Epidemiology and Population Health, British Columbia Centre for Excellence in HIV/AIDS, Vancouver, BC, Canada*  
Oghenowede Eyawo

*Faculty of Health Sciences, Simon Fraser University, Burnaby, BC, Canada*  
Oghenowede Eyawo

*College of Medicine, Imam Muhammad Ibn Saud Islamic University, Riyadh, Saudi Arabia*  
Mohammad Fareed

*Department of Psychology, Federal University of Sergipe, Sao Cristovao, Brazil*  
Andre Faro

*Social Determinants of Health Research Center, Hamadan University of Medical Sciences, Hamadan, Iran*  
Ali Akbar Fazaeli

*Department of Epidemiology, Hamadan University of Medical Sciences, Hamadan, Iran*  
Manoochehr Karami & Salman Khazaei

*Department of Environmental Health Engineering, Hamadan University of Medical Sciences, Hamadan, Iran*  
Mohammad Khazaei & Mostafa Leili

*Department of Biostatistics, Hamadan University of Medical Sciences, Hamadan, Iran*  
Naser Mohammad Gholi Mezerji

*Chronic Diseases (Home Care) Research Center, Hamadan University of Medical Sciences, Hamadan, Iran*  
Morteza Shamsizadeh

*Division of Neurology, University of Ottawa, Ottawa, ON, Canada*  
Seyed-Mohammad Fereshtehnejad

*Center for Biotechnology and Fine Chemistry, Catholic University of Portugal, Porto, Portugal*  
João C. Fernandes

*Psychiatry Department, Kaiser Permanente, Fontana, CA, USA*  
Irina Filip

*Department of Health Sciences, A.T. Still University, Mesa, Arizona, USA*  
Irina Filip

*School of Midwifery, A.T. Still University, Mesa, Arizona, USA*  
Ensiyeh Jenabi

*College of Graduate Health Sciences, A.T. Still University, Mesa, Arizona, USA*  
Amir Radfar

*Department of Public Health Medicine, Bielefeld University, Bielefeld, Germany*  
Florian Fischer

*Institute of Gerontology, National Academy of Medical Sciences of Ukraine, Kyiv, Ukraine*  
Nataliya A. Foigt

*Abadan School of Medical Sciences, Abadan, Iran*  
Masoud Foroutan

*Clinical Medicine and Wits Reproductive Health and HIV Insititute, University of the Witwatersrand, Johannesburg, South Africa*  
Joel M. Francis

*Gene Expression & Regulation Program, Cancer Institute (W.I.A), Philadelphia, PA, USA*  
Takeshi Fukumoto

*Department of Dermatology, Kobe University, Kobe, Japan*  
Takeshi Fukumoto

*Dr. Tewelde Legesse Health Sciences College, Mekelle, Ethiopia*  
Destallem G. Gebre

*Department of Epidemiology, Jimma University, Jimma, Ethiopia*  
Tsegaye T. Gebrehiwot

*Vaccines Department, Pfizer Inc., Collegeville, PA, USA*  
Bradford D. Gessner

*Agency of Preventive Medicine, Paris, France*  
Bradford D. Gessner

*Department of Pharmacy, Wollo University, Dessie, Ethiopia*  
Birhanu Geta

*Unit of Academic Primary Care, University of Warwick, Coventry, UK*  
Paramjit S. Gill

*Division of Health Sciences, University of Warwick, Coventry, UK*  
Olalekan A. Uthman

*Adelaide Medical School, University of Adelaide, Adelaide, SA, Australia*  
Tiffany K. Gill

*REQUIMTE/LAQV, Porto, Portugal*  
Nelson G. M. Gomes

*Nursing and Health Sciences Department, University of Massachusetts Boston, Boston, MA, USA*  
Philimon N. Gona

*Department of Biostatistics and Epidemiology, University of Oklahoma, Oklahoma City, OK, USA*  
Sameer V. Gopalani

*Department of Health and Social Affairs, Government of the Federated States of Micronesia, Palikir, Federated States of Micronesia*  
Sameer V. Gopalani

*Occupational and Environmental Epidemiology Section, Cancer Prevention and Research Institute, Florence, Italy*  
Giuseppe Gorini

*Postgraduate Program in Epidemiology, Federal University of Rio Grande do Sul, Porto Alegre, Brazil*  
Bárbara N. G. Goulart

*Health Improvement Directorate, Public Health England, London, UK*  
Felix Greaves

*School of Public Health, University of Haifa, Haifa, Israel*  
Manfred S. Green & Kerem Shuval

*School of Public Health and Preventive Medicine, Monash University, Melbourne, VIC, Australia*  
Yuming Guo, Thomas R. Hird & Shanshan Li

*Centre of Cardiovascular Research and Education in Therapeutics, Monash University, Melbourne, VIC, Australia*  
Richard Ofori-Asenso

*Department of Medicine, Monash University, Melbourne, VIC, Australia*  
Sojib bin Zaman

*Department of Epidemiology and Biostatistics, Zhengzhou University, Zhengzhou, China*  
Yuming Guo

*Obesity Research Center, Research Institute for Endocrine Sciences, Shahid Beheshti University of Medical Sciences, Tehran, Iran*  
Arvin Haj-Mirzaian

*Research Institute for Endocrine Sciences, Shahid Beheshti University of Medical Sciences, Tehran, Iran*  
Seyed Sina N. Irvani

*Foodborne and Waterborne Diseases Research Center, Shahid Beheshti University of Medical Sciences, Tehran, Iran*  
Hamed Mirjalali & Abbas Yadegar

*Prevention of Metabolic Disorders Research Center, Shahid Beheshti University of Medical Sciences, Tehran, Iran*  
Azra Ramezankhani

*Department of Epidemiology, Shahid Beheshti University of Medical Sciences, Tehran, Iran*  
Seyed Mohammad Riahi & Siamak Sabour

*Prevention of Cardiovascular Disease Research Center, Shahid Beheshti University of Medical Sciences, Tehran, Iran*  
Mahmoud Yousefifard

*Department of Health, Safety, and Environment (HSE), Shahid Beheshti University of Medical Sciences, Tehran, Iran*  
Reza Saeedi

*Critical Care Quality Improvement Research Center, Shahid Beheshti University of Medical Sciences, Tehran, Iran*  
Azra Ramezankhani

*Global and Community Mental Health Research Group, University of Macau, Macao, China*  
Brian J. Hall

*School of Health and Environmental Studies, Hamdan Bin Mohammed Smart University, Dubai, United Arab Emirates*  
Samer Hamidi

*Carlos III Health Institute, Biomedical Research Networking Center for Mental Health Network (CIBERSAM), Madrid, Spain*  
Rafael Tabarés-Seisdedos

*Biomedical Research Networking Center for Mental Health Network (CIBERSAM), Madrid, Spain*  
Josep M. Haro

*Research and Development Unit, San Juan de Dios Sanitary Park, Sant Boi De Llobregat, Spain*  
Josep M. Haro

*CIBERSAM, San Juan de Dios Sanitary Park, Sant Boi De Llobregat, Spain*  
Ai Koyanagi

*Independent Consultant, Tabriz, Iran*  
Hadi Hassankhani

*Public Health Department, Mizan-Tepi University, Teppi, Ethiopia*  
Hamid Y. Hassen

*Unit of Epidemiology and Social Medicine, University Hospital Antwerp, Wilrijk, Belgium*  
Hamid Y. Hassen

*School of Public Health, Curtin University, Bentley, Western Australia, Australia*  
Delia Hendrie & Ted R. Miller

*Population Health, Baker Heart and Diabetes Institute, Melbourne, VIC, Australia*  
Thomas R. Hird

*Center of Excellence in Behavioral Medicine, Nguyen Tat Thanh University, Ho Chi Minh, Vietnam*  
Chi L. Hoang & Giang T. Vu

*Center for Excellence in Behavioral Health, Nguyen Tat Thanh University, Ho Chi Minh, Vietnam*  
Long H. Nguyen & Son H. Nguyen

*Social Determinants of Health Research Center, Guilan Road Trauma Research Center, Guilan University of Medical Sciences, Rasht, Iran*  
Enayatollah Homaie Rad

*Guilan Road Trauma Research Center, Guilan University of Medical Sciences, Rasht, Iran*  
Enayatollah Homaie Rad

*Department of Pharmacology and Therapeutics, University of Dhaka, Dhaka, Bangladesh*  
Naznin Hossain

*Computer Science Department, University of Human Development, Sulaimaniyah, Iraq*  
Mehdi Hosseinzadeh

*Information Technology Department, University of Human Development, Sulaimaniyah, Iraq*  
Aso Mohammad Darwesh

*Department of Internal Medicine, Bucharest Emergency Hospital, Bucharest, Romania*  
Mihaela Hostiuc

*Clinical Legal Medicine, National Institute of Legal Medicine Mina Minovici, Bucharest, Romania*  
Sorin Hostiuc

*Division of Information and Computing Technology, Hamad Bin Khalifa University, Doha, Qatar*  
Mowafa Househ

*Qatar Foundation for Education, Science, and Community Development, Doha, Qatar*  
Mowafa Househ

*Faculty of Medicine Tunis, Medicine School of Tunis, Baab Saadoun, Tunisia*  
Mohamed Hsairi

*Global Health and Development Department, Taipei Medical University, Taipei City, Taiwan,*  
Usman Iqbal

*MRC Epidemiology Unit, University of Cambridge, Cambridge, UK*  
Nazrul Islam

*Medical School, Harvard University, Boston, MA, USA*  
Moritz U.G. Kraemer

*Department of Genetics, Harvard University, Boston, MA, USA*  
Alexandre Pereira

*Division of General Internal Medicine and Primary Care, Harvard University, Boston, MA, USA*  
Aziz Sheikh

*Harvard University, Boston, MA, USA*  
Nazrul Islam

*Institute for Physical Activity and Nutrition, Deakin University, Burwood, VIC, Australia*  
Sheikh Mohammed Shariful Islam

*Sydney Medical School, University of Sydney, Sydney, NSW, Australia*  
Sheikh Mohammed Shariful Islam

*Institute of Family Medicine and Public Health, University of Tartu, Tartu, Estonia*  
Mikk Jürisson

*Psychosis Department, Babol Nushirvani University of Technology, Babol, Iran*  
Nader Jafari Balalami

*Faculty of Graduate Studies, University of Colombo, Colombo, Sri Lanka*  
Achala U. Jayatilleke

*Institute of Medicine, University of Colombo, Colombo, Sri Lanka*  
Achala U. Jayatilleke

*Environmental Research Center, Duke Kunshan University, Kunshan, China*  
John S. Ji

*Department of Medicine, University of Miami, Atlantis, FL, USA*  
Yash B. Jobanputra

*Beijing Institute of Ophthalmology, Beijing Tongren Hospital, Beijing, China*  
Jost B. Jonas

*Social Determinants of Health Research Center, University of Social Welfare and Rehabilitation Sciences, Tehran, Iran*  
Zahra Jorjoran Shushtari

*University of Social Welfare and Rehabilitation Sciences, Tehran, Iran*  
Mehdi Noroozi

*Faculty of Medicine and Health Sciences, University of Opole, Opole, Poland*  
Jacek J. Jozwiak

*Department of Family Medicine and Public Health, University of Opole, Opole, Poland*  
Jacek J. Jozwiak

*Isfahan University of Medical Sciences, Isfahan, Iran*  
Hamed Kalani

*Research and Development, Australian Red Cross Blood Service, Sydney, NSW, Australia*  
Surendra Karki

*School of Public Health and Community Medicine, University of New South Wales, Sydney, NSW, Australia*  
Surendra Karki

*School of Medicine, University of New South Wales, Sydney, NSW, Australia*  
Pallab K. Maulik

*Odel Campus, University of Nairobi, Nairobi, Kenya*  
Peter N. Keiyoro

*Department of Psychiatry, University of Nairobi, Nairobi, Kenya*  
Manasi Kumar

*Michigan State University, East Lansing, MI, USA*  
Grant R. Kemp

*Department of Public Health and Community Medicine, Jordan University of Science and Technology, Ramtha, Jordan*  
Yousef S. Khader

*Epidemiology and Biostatistics Department, Health Services Academy, Islamabad, Pakistan*  
Ejaz A. Khan

*Population Studies, International Institute for Population Sciences, Mumbai, India*  
Junaid Khan

*International Institute for Population Sciences, Mumbai, India*  
Pushpendra Kumar & Parul Puri

*Department of Internal Medicine, John H. Stroger, Jr. Hospital of Cook County, Chicago, IL, USA*  
Muhammad S. Khan

*Department of Internal Medicine, Dow University of Health Sciences, Karachi, Pakistan*  
Muhammad S. Khan, Tariq J. Siddiqi & Muhammad S. Usman

*Institute of Health Policy and Management, Seoul National University, Seoul, South Korea*  
Young-Ho Khang

*Department of Health Policy and Management, Seoul National University, Seoul, South Korea*  
Young-Ho Khang

*Faculty of Health and Wellbeing, Sheffield Hallam University, Sheffield, UK*  
Khaled Khatab

*Department of Arts and Sciences, Ohio University, Zanesville, OH, USA*  
Khaled Khatab

*Internal Medicine and Gastroenterology Department, National Hepatology and Tropical Research Institute, Cairo, Egypt*  
Amir Khater

*Department of Nutrition and Health Science, Ball State University, Muncie, IN, USA*  
Jagdish Khubchandani

*School of Medicine, Xiamen University Malaysia, Sepang, Malaysia*  
Yun Jin Kim

*Department of Nutrition, Simmons College, Boston, MA, USA*  
Ruth W. Kimokoti

*Department of Health Management and Health Economics, Kristiania University College, Oslo, Norway*  
Adnan Kisa

*Department of Health Services Policy and Management, University of South Carolina, Columbia, SC, USA*  
Adnan Kisa

*Nursing and Health Promotion, Oslo Metropolitan University, Oslo, Norway*  
Sezer Kisa

*Department of Public Health, Debre Berhan University, Debre Berhan, Ethiopia*  
Tufa Kolola

*Independent Consultant, Jakarta, Indonesia*  
Soewarto Kosen

*Department of Internal and Pulmonary Medicine, Sheri Kashmir Institute of Medical Sciences, Srinagar, India*  
Parvaiz A. Koul

*Department of Anthropology, Panjab University, Chandigarh, India*  
Kewal Krishan

*Psychology and Health Promotion, University of Kwazulu-Natal, Durban, South Africa*  
Nuworza Kugbey

*Department of Public Health Medicine, University of Kwazulu-Natal, Durban, South Africa*  
Desmond Kuupiel, Yoshan Moodley & Kelechi E. Oladimeji

*Department of Psychology, University College London, London, UK*  
Manasi Kumar

*Institute of Child Health, University College London, London, UK*  
Joseph L. Ward

*Nursing, St. John of God Hospital, Duayaw Nkwanta, Ghana*  
Desmond Kuupiel

*National Institute for Health Research, Oxford Biomedical Research Centre (NIHR), Oxford, UK*  
Ben Lacey

*Department of Pediatrics, Post Graduate Institute of Medical Education and Research, Chandigarh, India*  
Sheetal D. Lad

*Department of Community and Family Medicine, Academy of Medical Science, Baghdad, Iraq*  
Faris H. Lami

*Department of Medical Sciences, Uppsala University, Uppsala, Sweden*  
Anders O. Larsson

*Department of Clinical Chemistry and Pharmacology, Uppsala University Hospital, Uppsala, Sweden*  
Anders O. Larsson

*Department of Medicine, University of Malaya, Kuala Lumpur, Malaysia*  
Lee-ling Lim

*Department of Medicine and Therapeutics, The Chinese University of Hong Kong, Shatin, China*  
Lee-ling Lim

*Department of Dentistry, Radboud University, Nijmegen, The Netherlands*  
Stefan Listl

*Section for Translational Health Economics, Heidelberg University Hospital, Heidelberg, Germany*  
Stefan Listl

*Department of Vector Biology, Liverpool School of Tropical Medicine, Liverpool, UK*  
Joshua Longbottom

*Alliance for Improving Health Outcomes, Inc., Quezon City, The Philippines*  
Jaifred Christian F. Lopez

*Institute of Nutrition, Friedrich Schiller University Jena, Jena, Germany*  
Stefan Lorkowski

*Competence Cluster for Nutrition and Cardiovascular Health (NUTRICARD), Jena, Germany*  
Stefan Lorkowski

*Department of Cardiology, Damietta University, Damietta, Egypt*  
Hassan Magdy Abd El Razek

*Ophthalmology Department, Aswan Faculty of Medicine, Aswan, Egypt*  
Muhammed Magdy Abd El Razek

*Department of Maternal and Child Nursing and Public Health, Federal University of Minas Gerais, Belo Horizonte, Brazil*  
Deborah C. Malta

*Post-graduate Program in Infectious Diseases and Tropical Medicine, Federal University of Minas Gerais, Belo Horizonte, Brazil*  
Bruno P. Sao Jose

*Institute for Social Science Research, The University of Queensland, Brisbane, QLD, Australia*  
Abdullah A. Mamun

*Surgery Department, Emergency University Hospital Bucharest, Bucharest, Romania*  
Ana-Laura Manda

*Campus Caucaia, Federal Institute of Education, Science and Technology of Ceará, Caucaia, Brazil*  
Francisco R. Martins-Melo

*Faculty of Health and Education, Botho University-Botswana, Gaborone, Botswana*  
Anthony A. Masaka

*Research Department, The George Institute for Global Health, New Delhi, India*  
Pallab K. Maulik

*Department of Biology and Biological Engineering, Chalmers University of Technology, Gothenburg, Sweden*  
Mohsen Mazidi

*Preventive Oncology Department, National Institute of Cancer Prevention and Research, Noida, India*  
Ravi Mehrotra

*Department of Epidemiology and Biostatistics, University of California San Francisco, San Francisco, CA, USA*  
Kala M. Mehta

*Peru Country Office, United Nations Population Fund (UNFPA), Lima, Peru*  
Walter Mendoza

*Neurocenter, Helsinki University Hospital, Helsinki, Finland*  
Atte Meretoja

*Breast Surgery Unit, Helsinki University Hospital, Helsinki, Finland*  
Tuomo J. Meretoja

*School of Health Sciences, University of Melbourne, Parkville, VIC, Australia*  
Atte Meretoja

*University of Helsinki, Helsinki, Finland*  
Tuomo J. Meretoja

*Clinical Microbiology and Parasitology Unit, Dr. Zora Profozic Polyclinic, Zagreb, Croatia*  
Tomislav Mestrovic

*University Centre Varazdin, University North, Varazdin, Croatia*  
Tomislav Mestrovic

*Pacific Institute for Research & Evaluation, Calverton, MD, USA*  
Ted R. Miller

*Health, Evidence, and Impact, McMaster University, Hamilton, ON, Canada*  
Edward J. Mills

*Department of Psychiatry and Behavioural Neurosciences, McMaster University, Hamilton, ON, Canada*  
Andrew T. Olagunju

*Department of Computer Science and Software Engineering, University of Western Australia, Perth, WA, Australia*  
George J. Milne

*Department of Public Health, Amrita Institute of Medical Sciences, Kochi, India*  
GK Mini

*Golestan Research Center of Gastroenterology and Hepatology, Golestan University of Medical Sciences, Gorgan, Iran*  
Gholamreza Roshandel

*Golestan University of Medical Sciences, Gorgan, Iran*  
Seyed Mostafa Mir

*Faculty of General Medicine, Kyrgyz State Medical Academy, Bishkek, Kyrgyzstan*  
Erkin M. Mirrakhimov

*Department of Atherosclerosis and Coronary Heart Disease, National Center of Cardiology and Internal Disease, Bishkek, Kyrgyzstan*  
Erkin M. Mirrakhimov

*Department of Food Technology, College of Agriculture, Salahaddin University-Erbil, Erbil, Iraq*  
Dara K. Mohammad

*School of Pharmacy, Haramaya University, Harar, Ethiopia*  
Ammas S. Mohammed

*Health Systems and Policy Research Unit, Ahmadu Bello University, Zaria, Nigeria*  
Shafiu Mohammed

*Department of Community Medicine, Ahmadu Bello University, Zaria, Nigeria*  
Mu'awiyyah B. Sufiyan

*Faculty of Life Sciences and Medicine, King's College London, London, UK*  
Mariam Molokhia

*Clinical Epidemiology and Public Health Research Unit, Burlo Garofolo Institute for Maternal and Child Health, Trieste, Italy*  
Lorenzo Monasta

*Department of Mathematical Sciences, University of Bath, Bath, UK*  
Paula Moraga

*International Laboratory for Air Quality and Health, Queensland University of Technology, Brisbane, QLD, Australia*  
Lidia Morawska

*School of Exercise and Nutrition Sciences, Queensland University of Technology, Brisbane, QLD, Australia*  
Quyen G. To

*Competence Center of Mortality-Follow-Up, German National Cohort*  
Ronny Westerman

*Federal Institute for Population Research, Wiesbaden, Germany*  
Ulrich O. Mueller

*Center for Population and Health, Wiesbaden, Germany*  
Ulrich O. Mueller

*Department of Pediatric Medicine, Nishtar Medical University, Multan, Pakistan*  
Ghulam Mustafa

*Department of Pediatrics & Pediatric Pulmonology, Institute of Mother & Child Care, Multan, Pakistan*  
Ghulam Mustafa

*Research and Analytics, Initiative for Financing Health and Human Development, Chennai, India*  
Ahamarshan J. Nagarajan

*Founder, Research and Analytics, Bioinsilico Technologies, Chennai, India*  
Ahamarshan J. Nagarajan

*Suraj Eye Institute, Nagpur, India*  
Vinay Nangia

*Cochrane South Africa, South African Medical Research Council, Cape Town, South Africa*  
Duduzile E. Ndwandwe, Chukwudi A. Nnaji & Evanson Z. Sambala

*Department of Cardiology, Cardio-aid, Bucharest, Romania*  
Ruxandra I. Negoii

*Department of Biological Sciences, University of Embu, Embu, Kenya*  
Josephine W. Ngunjiri

*Institute for Global Health Innovations, Duy Tan University, Hanoi, Vietnam*  
Huong L.T. Nguyen

*Public Health Science Department School of Public Health and Family Medicine, University of Cape Town, Cape Town, South Africa*  
Chukwudi A. Nnaji

*Department of Medicine, University of Cape Town, Cape Town, South Africa*  
Jean Jacques Noubiap, Karen Sliwa

*Independent Consultant, Accra, Ghana*  
Richard Ofori-Asenso

*Center for the Aid Program of Research in South Africa (CAPRISA) TB and HIV Pathogenesis Unit, United Nations Programme on HIV/AIDS (UNAIDS), Durban, South Africa*  
Kelechi E. Oladimeji

*Department of Psychiatry, University of Lagos, Lagos, Nigeria*  
Andrew T. Olagunju

*Gastroenterology and Liver Disease Research Center, A.C.S. Medical College and Hospital, Tehran, Iran*  
Meysam Olfatifar

*Department of Health Management and Economics, A.C.S. Medical College and Hospital, Tehran, Iran*  
Hasan Yusefzadeh

*Department of Food Science and Postharvest Technology, Gulu University, Gulu, Uganda*  
Solomon Olum

*Ghent University, Ghent, Belgium*  
Solomon Olum

*Centre for Healthy Start Initiative, Lagos, Nigeria*  
Bolajoko O. Olusanya

*Department of Pharmacology and Therapeutics, University of Nigeria Nsukka, Enugu, Nigeria*  
Obinna E. Onwujekwe

*Graduate School of Public Health, San Diego State University, San Diego, CA, USA*  
Eyal Oren

*Center for Health Systems Research, National Institute of Public Health, Cuernavaca, Mexico*  
Doris D. V. Ortega-Altamirano

*School of Medicine, Autonomous University of Madrid, Madrid, Spain*  
Alberto Ortiz

*Hospital Universitario de la Princesa, Autonomous University of Madrid, Madrid, Spain*  
Joan B. Soriano

*Department of Nephrology and Hypertension, The Institute for Health Research Foundation Jiménez Díaz University Hospital, Madrid, Spain*  
Alberto Ortiz

*Environmental Mangement and Toxicology, University of Benin, Benin City, Nigeria*  
Osayomwanbo Osarenotor

*Faculty of Geoinformation Science and Earth Observation, University of Twente, Enschede, The Netherlands*  
Frank B. Osei

*Department of Mathematics and Statistics, University of Energy and Natural Resources, Sunyani, Ghana*  
Frank B. Osei

*Analytical Center, Moscow Institute of Physics and Technology, Dolgoprudny, Russia*  
Stanislav S. Otstavnov

*Department of Information Technologies and Management, Moscow Institute of Physics and Technology, Dolgoprudny, Russia*  
Sergey K. Vladimirov

*Committee for the Comprehensive Assessment of Medical Devices and Information Technology, Health Technology Assessment Association, Moscow, Russia*  
Stanislav S. Otstavnov

*Department of Tb & Respiratory Medicine, Jagadguru Sri Shivarathreeswara University, Mysore, India*  
Mahesh P A

*Department of Medicine, Ottawa Hospital Research Institute, Ottawa, ON, Canada*  
Smita Pakhale

*Department of Medical Humanities and Social Medicine, Kosin University, Busan, South Korea*  
Eun-Kee Park

*Research and Evaluation, Population Council, New Delhi, India*  
Sangram K. Patel

*Indian Institute of Health Management Research University, Jaipur, India*  
Sangram K. Patel

*Center for Research and Innovation, Ateneo De Manila University, Pasig City, The Philippines*  
Veincent Christian F. Pepito

*Laboratory of Genetics and Molecular Cardiology, University of São Paulo, Sao Paulo, Brazil*  
Alexandre Pereira

*Department of Pathology and Legal Medicine, University of São Paulo, Sao Paulo, Brazil*  
Marcos R. Tovani-Palone

*Department of Psychiatry, University of São Paulo, Sao Paulo, Brazil*  
Yuan-Pang Wang

*Department of Cardiology, University of Bern, Bern, Switzerland*  
Thomas Pilgrim

*National Centre for Register-Based Research, Aarhus University, Aarhus, Denmark*  
Oleguer Plana-Ripoll

*Non-communicable Diseases Research Center, Alborz University of Medical Sciences, Karaj, Iran*  
Mostafa Qorbani

*Department of Health Promotion and Education, Alborz University of Medical Sciences, Karaj, Iran*  
Faramarz Shaahmadi

*Biomedical Engineering, Amirkabir University of Technology, Tehran, Iran*  
Mohammad Rabiee

*Medichem, Barcelona, Spain*  
Amir Radfar

*Department of Nephrology, Nizam's Institute of Medical Sciences, Hyderabad, India*  
Sree Bhushan Raju

*Policy Research Institute, Kathmandu, Nepal*  
Chhabi L. Ranabhat

*Institute for Poverty Alleviation and International Development, Yonsei University, Wonju, South Korea*  
Chhabi L. Ranabhat

*Gonçalo Moniz Institute, Oswaldo Cruz Foundation, Salvador, Brazil*  
Davide Rasella

*Department of Epidemiology, Birjand University of Medical Sciences, Birjand, Iran*  
Seyed Mohammad Riahi

*Department of Clinical Research, Federal University of Uberlândia, Uberlândia, Brazil*  
Leonardo Roevers

*Department of Public Health, Wollega University, Nekemte, Ethiopia*  
Elias E.M. Roro

*School of Biotechnology, Ikiam Amazon Regional University, Ciudad De Tena, Ecuador*  
Enrico Rubagotti

*Department of Ocean Science and Engineering, Southern University of Science and Technology, Shenzhen, China*  
Enrico Rubagotti

*Department of Biomedical Sciences, University of Sassari, Sassari, Italy*  
Salvatore Rubino

*Department of Pathology Al-Imam Mohammad Ibn Saud Islamic University, Riyadh, Saudi Arabia*  
Nasir Salam

*School of Health and Policy Management, Faculty of Health, York University, Toronto, ON, Canada*  
Payman Salamati

*Research Deputy, Taleghani Hospital, Kermanshah, Iran*  
Saleh Salehi Zahabi

*Center for Health Policy & Center for Primary Care and Outcomes Research, Stanford University, Stanford, CA, USA*  
Joshua A. Salomon

*Department of Entomology, Ain Shams University, Cairo, Egypt*  
Abdallah M. Samy

*Department of Community Medicine, PSG Institute of Medical Sciences and Research, Coimbatore, India*  
Sivan Y. Saraswathy

*PSG-FAIMER South Asia Regional Institute, Coimbatore, India*  
Sivan Y. Saraswathy

*Department of Health and Society, Faculty of Medicine, University of Applied and Environmental Sciences, Bogotá, Colombia*  
Rodrigo Sarmiento-Suárez

*Surgery Department, Hamad Medical Corporation, Doha, Qatar*  
Brijesh Sathian

*Faculty of Health & Social Sciences, Bournemouth University, Bournemouth, UK*  
Brijesh Sathian

*Department of Psychology, University of Alabama at Birmingham, Birmingham, AL, USA*  
David C. Schwebel

*Department of Epidemiology, University of Alabama at Birmingham, Birmingham, AL, USA*  
Jasvinder A. Singh

*Department of Medicine, University of Alabama at Birmingham, Birmingham, AL, USA*  
Jasvinder A. Singh

*Independent Consultant, Karachi, Pakistan*  
Masood Ali Shaikh

*School of Medicine, Dezful University of Medical Sciences, Dezful, Iran*  
Mehran Shams-Beyranvand

*HIV/STI Surveillance Research Center, Kerman University of Medical Sciences, Kerman, Iran*  
Hamid Sharifi

*Department of Health Management, Policy and Economics, Kerman University of Medical Sciences, Kerman, Iran*  
Vahid Yazdi-Feyzabadi

*Health Services Management Research Center, Kerman University of Medical Sciences, Kerman, Iran*  
Vahid Yazdi-Feyzabadi

*University School of Management and Entrepreneurship, Delhi Technological University, New Delhi, India*  
Rajesh Sharma

*Usher Institute of Population Health Sciences and Informatics, University of Edinburgh, Edinburgh, UK*  
Aziz Sheikh

*National Institute of Infectious Diseases, Tokyo, Japan*  
Mika Shigematsu

*Finnish Institute of Occupational Health, Helsinki, Finland*  
Rahman Shiri

*Institute of Medical Epidemiology, Martin Luther University Halle-Wittenberg, Halle, Germany*  
Ivy Shiue

*Department of Epidemiology, School of Preventive Oncology, Patna, India*  
Dhirendra N. Sinha

*Department of Epidemiology, Healis Sekhsaria Institute for Public Health, Mumbai, India*  
Dhirendra N. Sinha

*Department of Physiotherapy and Occupational Therapy, Næstved-Slagelse-Ringsted Hospitals, Slagelse, Denmark*  
Malede M. Sisay

*Medical Division, German Leprosy and TB Relief Association Ethiopia, Addis Ababa, Ethiopia*  
Solomon Sisay

*Department of Medicine, University of Calgary, Calgary, AB, Canada*  
Ranjani Somayaji

*Centro de Investigación en Red de Enfermedades Respiratorias (CIBERES), Institute of Health Carlos III, Madrid, Spain*  
Joan B. Soriano

*Division of Community Medicine, International Medical University, Kuala Lumpur, Malaysia*  
Chandrashekhar T. Sreeramareddy

*Department of Nursing, Muhammadiyah University of Surakarta, Kartasura, Indonesia*  
Agus Sudaryanto

*Department of Criminology, Law, and Society, University of California Irvine, Irvine, CA, USA*  
Bryan L. Sykes

*Neurology Department, Sree Chitra Tirunal Institute for Medical Sciences and Technology, Trivandrum, India*  
PN Sylaja

*Department of Medicine, University of Valencia, Valencia, Spain*  
Rafael Tabarés-Seisdedos

*School of Social Work, University of Illinois, Urbana, IL, USA*  
Karen M. Tabb

*Cancer Control Center, Osaka International Cancer Institute, Osaka, Japan*  
Takahiro Tabuchi

*University Institute "Egas Moniz", Monte Da Caparica, Portugal*  
Nuno Taveira

*Research Institute for Medicines, Faculty of Pharmacy of Lisbon, University of Lisbon, Lisbon, Portugal*  
Nuno Taveira

*College of Medicine, Alfaisal University, Riyadh, Saudi Arabia*  
Mohamad-Hani Tamsah

*Anesthesiology Department, University of Virginia, Charlottesville, VA, USA*  
Abdullah S. Terkawi

*Syrian Expatriate Medical Association (SEMA), Charlottesville, VA, USA*  
Abdullah S. Terkawi

*Department of Public Health and Community Medicine, Central University Kerala, Kasaragod, India*  
Kavumpurathu R. Thankappan

*Department of Health Economics, Hanoi Medical University, Hanoi, Vietnam*  
Bach Xuan Tran

*Department of Molecular Medicine and Pathology, University of Auckland, Auckland, New Zealand*  
Khanh B. Tran

*Clinical Hematology and Toxicology, Military Medical University, Hanoi, Vietnam*  
Khanh B. Tran

*Gomal Center of Biochemistry and Biotechnology, Gomal University, Dera Ismail Khan, Pakistan*  
Irfan Ullah

*TB Culture Laboratory, Mufti Mehmood Memorial Teaching Hospital, Dera Ismail Khan, Pakistan*  
Irfan Ullah

*Department of Education and Health, Trauma Research Center, Tehran, Iran*  
Amir Vahedian-Azimi

*Critical and Intensive Care Department, Trauma Research Center, Tehran, Iran*  
Amir Vahedian-Azimi

*Argentine Society of Medicine, Ciudad De Buenos Aires, Argentina*  
Pascual R. Valdez

*Velez Sarsfield Hospital, Buenos Aires, Argentina*  
Pascual R. Valdez

*University Medical Center Groningen, University of Groningen, Groningen, The Netherlands*  
Job F. M. Van Boven

*Department of General Practice, University Medical Center Groningen, Groningen, The Netherlands*  
Job F. M. Van Boven

*Ukk Institute, Tampere, Finland*  
Tommi J. Vasankari

*Psychosocial Injuries Research Center, Ilam University of Medical Sciences, Ilam, Iran*  
Yousef Veisani

*Raffles Neuroscience Centre, Raffles Hospital, Singapore, Singapore*  
Narayanaswamy Venketasubramanian

*Yong Loo Lin School of Medicine, National University of Singapore, Singapore, Singapore*  
Narayanaswamy Venketasubramanian

*Department of Medical and Surgical Sciences, University of Bologna, Bologna, Italy*  
Francesco S. Violante

*Occupational Health Unit, Sant'orsola Malpighi Hospital, Bologna, Italy*  
Francesco S. Violante

*Department of Information and Internet Technologies, I.m. Sechenov First Moscow State Medical University, Moscow, Russia*  
Sergey K. Vladimirov

*Department of Health Care Administration and Economy, National Research University Higher School of Economics, Moscow, Russia*  
Vasily Vlassov

*Foundation University Medical College, Foundation University, Rawalpindi, Pakistan*  
Yasir Waheed

*Department of Epidemiology and Biostatistics, Wuhan University, Wuhan, China*  
Yafeng Wang & Chuanhua Yu

*Global Health Institute, Wuhan University, Wuhan, China*  
Chuanhua Yu

*Department of Preventative Medicine, Wuhan University, Wuhan, China*  
Yunquan Zhang

*Cardiology Department, Royal Children's Hospital, Melbourne, VIC, Australia*  
Robert G. Weintraub

*Murdoch Childrens Research Institute, Melbourne, VIC, Australia*  
Robert G. Weintraub

*Cochrane South Africa, Medical Research Council South Africa, Cape Town, South Africa*  
Charles S. Wiysonge

*Department of Global Health, Stellenbosch University, Cape Town, South Africa*  
Charles S. Wiysonge

*Zhejiang Spine Research Center, Wenzhou Medical University, Wenzhou, China*  
Ai-Min Wu

*School of Medicine, Nanjing University, Nanjing, China*  
Gelin Xu

*Department of Diabetes and Metabolic Diseases, University of Tokyo, Tokyo, Japan*  
Tomohide Yamada

*Department of Pediatrics, University of Jos, Jos, Nigeria*  
Christopher S. Yilgwan

*Department of Pediatrics, Jos University Teaching Hospital, Jos, Nigeria*  
Christopher S. Yilgwan

*Department of Psychopharmacology, National Center of Neurology and Psychiatry, Tokyo, Japan*  
Naohiro Yonemoto

*Health Economics & Finance, Global Health, Jackson State University, Jackson, Mississippi, USA*  
Mustafa Z. Younis

*Research Center for Public Health, Tsinghua University, Peking, China*  
Mustafa Z. Younis

*Electrical Engineering, Institute for Research in Fundamental Sciences, Tehran, Iran*  
Erfan Zabeh

*Maternal and Child Wellbeing Unit, African Population Health Research Centre, Nairobi, Kenya*  
Taddese A. Zerfu

*Public Health Department, Dilla University, Dilla, Ethiopia*  
Taddese A. Zerfu

*School of Public Health, Wuhan University of Science and Technology, Wuhan, China*  
Yunquan Zhang
